# Supplementary material for: Strategies towards simpler configuration and higher peak capacity with comprehensive multidimensional gas chromatography
Source: Royal Society of Chemistry journal article supplement (doi:10.1039/d0ra10495g), 2021-01-01
Supplement: d0ra10495g1.xlsx [file d0ra10495g1.xlsx]

## Sheet: HC 5 min
			The raw data obtained from a single run for the overall comprehensive analysis using 5.00 min H/C window
			1st run	1st run	1st run	1st run	1st run	1st run	1st run	1st run	1st run	1st run
	1tR cut	from	8.5	13.5	18.5	23.5	28.5	33.5	38.5	43.5	48.5	53.5
		to	13.5	18.5	23.5	28.5	33.5	38.5	43.5	48.5	53.5	58.5
		1tR min	11	16	21	26	31	36	41	46	51	56
		2tR min	Intensity
	1	0	12281	30593	48022	26652	80064	123961	60224	299005	432958	843913
	2	0.0059453	11959	31246	47183	30541	82757	140396	57284	295656	423821	952760
	3	0.0118903	12412	30114	45274	27189	81723	158125	53310	310920	419865	1050783
	4	0.0178353	10116	29316	44743	30681	83435	174931	52806	310982	420718	1167119
	5	0.0237803	10258	23512	44742	30974	82519	199948	55560	313184	432427	1262282
	6	0.0297253	13505	21749	48842	31718	85604	219768	51834	309563	432336	1322454		Data Transformation
	7	0.0356703	13624	24367	44985	31629	82153	250883	51218	311130	424828	1361685
	8	0.0416153	9692	24785	48174	27796	88237	266609	56091	310757	432362	1362482
	9	0.0475603	12580	24638	45307	30806	82265	279412	52585	313647	432728	1351328
	10	0.0535053	9831	22970	47546	27875	80078	291105	53734	310331	422884	1314770
	11	0.0594503	10347	26658	43740	27163	79104	286095	56131	318494	432704	1273825
	12	0.0653953	13987	33003	48193	31048	73413	273973	59367	320353	431039	1210528
	13	0.0713403	10671	42336	48349	31777	70060	254107	62851	314322	431356	1122358
	14	0.0772853	10872	51895	48327	29267	67313	232066	72884	321838	420775	1060992
	15	0.0832303	10995	67904	49257	31931	61530	200563	73116	312211	436728	954113
	16	0.0891753	14500	76732	49894	28660	56843	170804	72022	318819	424587	865885
	17	0.0951203	13655	78154	45225	28062	58039	146340	75947	317111	437114	786723
	18	0.101065	10318	88501	50362	32689	54909	120551	70775	316214	424512	693892
	19	0.10701	13659	90851	48010	31949	48105	107819	64439	314436	418940	632904
	20	0.112955	13612	90300	48225	32015	49461	98797	62210	320823	423990	586122
	21	0.1189	12874	88074	47196	34262	48522	93084	60909	320432	435852	557894
	22	0.124845	9813	93115	52209	30207	43231	95943	58245	327042	428414	530059
	23	0.13079	13483	93102	46969	31160	45895	94821	56265	324664	421256	510093
	24	0.136735	10210	89276	49625	30027	45770	98164	59465	326026	424291	500755
	25	0.14268	14289	91259	55296	30460	45183	98174	58566	338049	431591	497742
	26	0.148625	14572	91509	53634	34084	43442	98224	56077	334955	432696	489662
	27	0.15457	12977	92662	58085	31409	40667	98723	53908	342387	435105	483672
	28	0.160515	10775	92537	59510	32034	40429	97989	54335	333275	428185	486104
	29	0.16646	14023	86831	62371	32461	39926	96417	52738	341493	417265	488675
	30	0.172405	13391	86341	63798	32000	43850	92160	57231	333384	419751	486174
	31	0.17835	12964	91202	69620	36482	40152	91149	52034	334508	431129	468445
	32	0.184295	12951	91271	73738	33071	40378	90644	52914	337370	421007	482952
	33	0.19024	9250	94101	70689	36744	39183	90008	55766	330249	425147	486626
	34	0.196185	11904	91626	66458	33659	38023	94977	53495	337819	434312	480079
	35	0.20213	9209	91685	68430	35806	38615	91903	55368	335253	429814	470167
	36	0.208075	12362	87164	68473	36898	38208	98057	55754	345775	426473	480827
	37	0.21402	8733	91553	68251	40416	40019	100068	52230	342079	419885	480082
	38	0.219965	8540	93534	64096	38111	38298	96978	56251	334580	415978	481977
	39	0.22591	11730	92194	66802	39651	40699	104398	52250	343212	414940	480994
	40	0.231855	11477	93277	65272	41122	40929	102304	52606	342609	431307	467451
	41	0.2378	11451	93156	65563	42746	40765	108325	53190	343249	432571	477026
	42	0.243745	11016	94030	72866	43825	39057	106428	52807	343011	420974	483870
	43	0.24969	11873	91917	69998	45290	37816	112750	54206	341435	431710	482579
	44	0.255635	11292	91027	74152	48575	41962	119761	54023	346984	426752	484978
	45	0.26158	11566	91286	72476	46704	40286	126024	53826	349512	432195	489867
	46	0.267525	11221	89462	76535	47130	41589	142784	53389	354048	432755	474968
	47	0.27347	11653	88479	75127	52530	38665	157064	53438	354308	436212	491974
	48	0.279415	10912	87420	77545	55263	39119	164593	58927	344209	433205	502412
	49	0.28536	8079	88054	79985	52827	39673	166405	56862	344652	431319	497577
	50	0.291305	7990	89699	79890	54198	40999	154176	59153	343516	435460	499644
	51	0.29725	8161	86714	79368	55934	45034	138729	71292	343701	419784	490587
	52	0.303195	10827	85662	84841	56178	42873	117541	114784	356679	431489	504487
	53	0.30914	8222	80422	87968	58546	43224	95781	193482	352831	436688	499365
	54	0.315085	7825	86719	90580	62329	43887	79728	305889	353483	428865	491481
	55	0.32103	7506	85254	92603	61907	47004	70586	414031	358089	426486	489912
	56	0.326975	8161	86201	103102	65785	43555	62744	469723	357045	434189	478550
	57	0.33292	11903	82675	109697	62947	46939	58980	457434	359540	424149	476879
	58	0.338865	11996	81321	110728	63820	42476	53554	403026	360807	419333	475926
	59	0.34481	11426	80016	119632	73269	42502	55587	326136	361832	422372	487486
	60	0.350755	11596	82968	120927	73481	45435	65814	231842	364200	427857	486840
	61	0.3567	8894	82319	128921	73723	42876	76852	159977	366196	425270	472121
	62	0.362645	11718	83094	132637	76468	42824	95124	120452	358542	433955	492087
	63	0.36859	8314	87910	136823	84157	46689	110560	103758	366632	430009	483756
	64	0.374535	10743	91043	141808	80864	47870	123469	96130	366712	433918	494492
	65	0.38048	11191	94104	144833	88063	45070	124315	103251	360951	415725	500622
	66	0.386425	10948	108985	142978	94398	44002	111417	104463	363197	436952	492604
	67	0.39237	10933	125260	154655	92126	49184	101291	113466	367039	436415	499349
	68	0.398315	7830	141315	163046	96501	46867	106340	124457	371182	423048	504268
	69	0.40426	10238	164352	168392	99692	48691	126830	136552	369887	431367	519285
	70	0.410205	10964	196224	173765	102422	45858	186771	142575	362741	436491	518851
	71	0.41615	11106	239914	178548	107386	46766	264362	147199	373941	433716	518230
	72	0.422095	7575	276704	183949	107480	46942	351972	149671	369040	435701	523050
	73	0.42804	7315	320605	193710	114447	47792	388348	146446	374143	436605	521519
	74	0.433985	7181	357211	195264	116940	46560	384710	134720	372399	434894	518379
	75	0.43993	6909	393333	197215	127018	45410	316755	119698	377010	423766	510008
	76	0.445875	11066	409745	210188	129550	46940	239035	101194	381324	434783	517141
	77	0.45182	7037	407865	221801	131622	43851	170357	86612	386562	427871	501910
	78	0.457765	10943	382567	221980	135867	42376	123223	76249	378963	421585	495141
	79	0.46371	11810	343847	234084	136549	41736	96849	70026	381774	435341	504637
	80	0.469655	13411	289445	235962	139006	43543	85612	67684	372541	416530	492664
	81	0.4756	9311	229478	247792	135912	44762	77521	70039	381215	432366	500694
	82	0.481545	14676	179022	254406	144408	39316	68363	65940	382570	432112	503944
	83	0.48749	13559	141350	276165	141802	42689	62901	65922	382984	422102	502285
	84	0.493435	13957	110863	295155	143477	42559	62379	65880	376211	436126	506579
	85	0.49938	14031	90208	343179	141816	38389	54933	72481	379114	433322	504144
	86	0.505325	13763	78224	419603	145363	40131	53931	67385	381400	435634	502934
	87	0.51127	12980	67657	542113	148185	39525	53529	69251	383749	436442	488572
	88	0.517215	12619	67189	728304	147460	38802	55846	69858	392821	425822	494142
	89	0.52316	13697	59429	967242	149594	38290	58595	71658	396888	441740	490307
	90	0.529105	14371	62452	1287477	148382	42478	59394	82823	397660	436213	487662
	91	0.53505	10050	57345	1637163	144210	40905	62565	80542	394118	435157	501064
	92	0.540995	13797	62432	2002124	141537	37314	66380	90592	402749	427313	498019
	93	0.54694	12473	61655	2321026	126949	40491	68947	104832	388424	436712	494657
	94	0.552885	12489	57684	2523323	124027	38855	73295	107054	393028	443215	497749
	95	0.55883	9780	63151	2568705	109663	37584	71588	116383	399839	440220	493512
	96	0.564775	8750	62153	2500372	102765	36852	76258	122665	385555	426598	492609
	97	0.57072	12633	65593	2239906	90863	40732	69368	125884	387358	437405	478961
	98	0.576665	12714	65158	1872831	76265	37723	64702	131012	385561	428244	487222
	99	0.58261	13537	65934	1522724	65254	38928	65047	122682	394358	422684	493103
	100	0.588555	12975	64444	1271096	58822	38190	57033	114034	400005	424780	492513
	101	0.5945	8986	70359	1112575	53843	38989	54928	105141	392667	426026	492398
	102	0.600445	12778	70675	1026172	47555	38795	57808	94167	392141	439595	478722
	103	0.60639	12548	72927	962872	42455	43481	53612	83375	407309	437501	493623
	104	0.612335	12668	70598	887149	40143	40619	51347	74534	405824	441088	493408
	105	0.61828	12869	75011	808564	39199	40965	51127	67754	404462	430081	493567
	106	0.624225	13342	69759	691734	36884	38587	52403	63042	404536	439463	485560
	107	0.63017	8741	69890	577486	36661	40297	53891	60181	404080	444716	500721
	108	0.636115	12694	80055	474908	37424	40257	53981	57176	407364	438522	501606
	109	0.64206	12504	77363	401862	37689	40411	55473	59401	393778	443897	504399
	110	0.648005	9707	85521	347373	33754	40734	58772	61024	394630	432712	505123
	111	0.65395	14862	88833	311876	34702	44146	65146	59285	402496	440887	508318
	112	0.659895	16113	84093	280130	36877	42549	64960	63030	394056	443713	509576
	113	0.66584	19492	89166	265364	34173	43554	68818	58579	407005	431191	505878
	114	0.671785	20645	96620	249667	34415	43806	71082	58121	414746	442745	494275
	115	0.67773	20349	98349	234412	34476	44553	80794	58531	422466	436891	511101
	116	0.683675	16305	93796	227914	37029	48074	89808	60968	437017	444794	506956
	117	0.68962	19968	101840	219641	38181	44670	91707	57861	440001	444085	495155
	118	0.695565	19454	105451	216450	34506	44831	101822	57801	445169	446383	501167
	119	0.70151	18147	103653	206330	37274	44910	115324	59709	447223	434930	505284
	120	0.707455	17644	100347	208957	34286	44722	130759	59199	452196	446542	506582
	121	0.7134	16983	107533	206310	37566	49896	142806	58865	447028	446877	498941
	122	0.719345	12217	111129	205922	36137	47379	160253	59213	451985	434889	502919
	123	0.72529	15301	115399	205526	36305	51225	179695	66255	442154	445181	508484
	124	0.731235	14250	118277	195626	33244	47666	199767	63638	459884	445338	506491
	125	0.73718	9991	123569	193927	35556	49170	221885	68242	457267	443932	499874
	126	0.743125	12470	126351	195803	32096	48902	249402	62100	455879	445058	490720
	127	0.74907	12717	128935	195978	32901	49942	279279	61330	447075	444924	491942
	128	0.755015	12167	126029	187798	35300	50206	306662	59213	426334	430862	494846
	129	0.76096	12055	136246	185385	35879	52748	347049	62247	418500	442244	489010
	130	0.766905	11888	141512	184454	35905	55004	382183	60457	417963	427008	489281
	131	0.77285	8336	136824	181412	34776	57134	416524	60604	410729	444867	487583
	132	0.778795	11767	148168	181167	32782	60866	459103	60489	404617	438509	474754
	133	0.78474	8474	150438	183707	33890	59581	504796	64036	402798	445746	475441
	134	0.790685	11542	152157	185660	32211	64868	551544	59564	397662	440997	476873
	135	0.79663	7947	160566	181477	34357	66769	594831	64530	409339	441717	487245
	136	0.802575	7358	156187	186478	34289	67893	649757	59050	406605	442899	482355
	137	0.80852	11282	169663	189099	34620	65305	686152	59402	412006	436656	498645
	138	0.814465	11139	178278	190969	35019	63000	711422	60399	407852	431447	486077
	139	0.82041	11537	183695	192909	34185	63448	703742	60300	409412	439802	496201
	140	0.826355	11639	187747	197450	33928	64684	686004	61888	405673	444373	509030
	141	0.8323	10595	193020	200209	35013	62210	629006	64721	413500	441187	493739
	142	0.838245	10797	202935	201687	35177	63920	567648	61767	411778	428415	511155
	143	0.84419	10965	210494	203711	35178	63005	478151	65734	398248	439453	500752
	144	0.850135	7891	221120	209017	34710	62803	388192	67124	409545	439002	511517
	145	0.85608	7607	231564	206581	35523	66865	292545	62088	406705	438790	506686
	146	0.862025	11034	244096	207940	39278	62875	226828	67879	407189	425761	507316
	147	0.86797	11319	256810	212587	35843	61652	160170	67924	409307	440262	500054
	148	0.873915	7288	267524	218868	35948	67331	119612	69213	404346	432540	484156
	149	0.87986	7555	286980	221863	36324	62667	88423	69371	412094	441864	489287
	150	0.885805	10773	294362	223679	36516	62332	68648	64392	412045	430858	491110
	151	0.89175	10693	310662	230482	40429	65803	56078	65514	414153	441023	474673
	152	0.897695	10702	315844	233569	39302	64810	54917	70790	404594	433107	485390
	153	0.90364	6805	324148	239446	35406	65304	47643	67151	412827	444397	468353
	154	0.909585	10541	335732	244195	36260	66831	46149	65326	411616	428129	468831
	155	0.91553	7229	337678	251861	36532	65875	49667	65652	405321	445084	465769
	156	0.921475	7186	341107	254237	35790	67094	49178	64367	420892	440437	479281
	157	0.92742	11354	342871	259444	35639	68348	45760	63591	419818	441106	468082
	158	0.933365	11185	344017	264160	35203	71637	48276	64756	425429	439686	480370
	159	0.93931	10293	337801	267405	35034	70879	48835	65610	423389	434820	482618
	160	0.945255	10250	338851	273811	37846	68175	55261	69083	435368	440881	487125
	161	0.9512	7219	330449	277548	38472	69788	59200	63994	435301	438353	484736
	162	0.957145	6900	326971	280710	35065	73250	57151	65244	453849	442456	494322
	163	0.96309	6973	322159	285249	33887	71008	64289	65709	461310	441718	497294
	164	0.969035	10162	323514	283558	34511	75881	71398	73340	461432	432185	502946
	165	0.97498	9926	316412	293986	37287	78429	67481	69685	477970	439270	513316
	166	0.980925	7225	310617	296247	35512	78785	70104	69742	506137	443994	515432
	167	0.98687	10902	313856	295595	35304	77178	61962	65955	520478	444368	508908
	168	0.992815	14935	303043	300802	35346	79845	57099	65208	531050	445171	520978
	169	0.99876	28432	296582	300249	36267	84174	50355	63371	525182	443373	516947
	170	1.00471	55088	291039	297810	35825	91618	48013	63724	527894	433079	511815
	171	1.01065	99911	280847	295795	35326	92604	45112	66355	514587	446636	506339
	172	1.0166	154578	263349	295905	38949	95323	42627	81853	508087	444624	504706
	173	1.02254	208185	266423	288154	39113	104024	41888	146269	481751	441396	515017
	174	1.02849	257968	259521	288262	37874	108846	39340	284472	469905	445038	508620
	175	1.03443	287788	248273	286381	37084	112112	41605	486966	471459	432198	509324
	176	1.04038	334573	244247	285500	39113	114746	40602	659184	463870	447492	510585
	177	1.04632	361783	238896	280275	36507	120976	39892	670287	461605	447373	497589
	178	1.05227	375970	224877	273660	37858	131929	41327	531522	465348	442106	506738
	179	1.05821	400265	213080	268477	38520	135953	43159	335534	462727	435998	507039
	180	1.06416	403235	198289	260526	40912	139887	41404	209069	467944	446266	509486
	181	1.0701	410905	181430	253445	44654	145538	40463	145178	477471	441744	504610
	182	1.07605	422619	160579	248208	44256	149599	40668	113192	487934	431926	510685
	183	1.08199	423471	137158	239350	43547	152201	41111	95177	497076	442591	494575
	184	1.08794	427483	127329	232429	42003	152317	45639	86306	497277	441417	500704
	185	1.09388	429273	112922	226830	46276	156198	45682	83202	507962	444285	507841
	186	1.09983	429848	103312	214910	46129	159567	41648	79027	506510	428508	503915
	187	1.10577	432690	91358	212579	42361	155317	46351	98394	514901	442714	499804
	188	1.11172	427760	74599	207018	46011	160132	44646	164314	535176	443921	499976
	189	1.11766	433974	76446	198277	46480	161092	49758	335038	544516	445212	497164
	190	1.12361	436130	63052	195103	47188	167233	48262	586002	549228	445847	493740
	191	1.12955	436620	68113	186913	47983	167706	54445	795035	570749	433551	493099
	192	1.1355	435348	56106	177549	49988	159475	53612	824552	563992	446888	475848
	193	1.14144	436712	64766	176176	48708	162837	61679	664636	568659	445081	485440
	194	1.14739	437707	60586	172769	47838	160079	58715	417379	542222	429214	491284
	195	1.15333	436581	61803	166560	50712	151391	61455	236534	531368	446951	490034
	196	1.15928	436069	58870	160306	53438	140123	65937	152394	504159	440384	473898
	197	1.16522	434168	61939	160169	51347	123855	64983	126229	485182	429699	495060
	198	1.17117	431201	59169	153971	54430	107621	65737	107935	481684	430897	493911
	199	1.17711	428303	60992	154360	54124	91602	65994	105068	488264	432837	490308
	200	1.18306	422803	60074	154776	55442	80395	60675	94749	480086	446754	493911
	201	1.189	423062	60328	152674	59672	68272	56958	90428	500177	448463	492605
	202	1.19495	423809	59293	156094	57772	58171	53634	88573	514276	444477	487488
	203	1.20089	416481	59888	154867	58496	50586	49601	86950	515253	442596	478687
	204	1.20684	412332	59000	154746	60360	45661	47631	83068	528162	445337	494577
	205	1.21278	409662	62480	156577	60751	43365	44287	85979	521633	450689	495560
	206	1.21873	409753	61103	156712	65241	40708	46341	86871	505419	433376	495328
	207	1.22467	406786	61236	153720	73401	39660	42131	80213	490779	444932	495883
	208	1.23062	402872	62825	156281	71299	38253	41827	81268	485961	444261	494093
	209	1.23656	396206	63228	152578	74161	39080	40635	81704	458822	432647	493921
	210	1.24251	394425	62993	158643	77835	40056	39496	80972	461139	447200	472840
	211	1.24845	388716	64103	165541	82163	39105	42323	82773	440301	444330	486656
	212	1.2544	390531	65164	160443	88250	38167	40024	82681	449579	432690	471525
	213	1.26034	377536	65383	165916	86880	38370	44175	81263	444321	443569	474593
	214	1.26629	378016	67406	164102	93925	39010	40063	80475	431864	434820	470221
	215	1.27223	365968	65684	168163	94924	38449	43072	76738	444448	444311	473964
	216	1.27818	331791	68591	164856	96695	41617	49041	77417	431276	443641	464644
	217	1.28412	265802	68579	168644	98617	37461	58181	78940	445624	442863	480642
	218	1.29007	179554	67956	168171	104875	38124	91141	77894	437210	435522	481589
	219	1.29601	102079	59619	169693	108237	41967	157568	77955	429291	454505	482033
	220	1.30196	54468	70124	164967	113415	38324	260944	76863	430434	458556	482445
	221	1.3079	35395	70768	165517	111962	41784	381612	77868	438845	453855	468616
	222	1.31385	24786	72933	161171	116684	38522	482089	77711	432532	473199	471608
	223	1.31979	25904	74063	163718	117554	41281	540214	76193	441117	474698	480223
	224	1.32574	25835	73990	170634	118175	41177	526014	78238	431829	518725	471569
	225	1.33168	26004	74739	174384	118325	36469	461438	79255	441156	546050	485148
	226	1.33763	27054	75400	176234	120650	38156	346954	80037	431132	564143	475908
	227	1.34357	25592	74754	175215	118391	40659	242826	81489	435777	598691	486957
	228	1.34952	26533	77689	175848	117470	37687	160592	78741	438082	641524	487292
	229	1.35546	24257	79067	174219	117961	38180	109282	83113	431562	671812	486073
	230	1.36141	27712	77806	175235	116780	39307	81615	76123	444461	693385	489311
	231	1.36735	27932	77209	173046	116129	37601	69972	77594	438198	721685	494328
	232	1.3733	28645	77745	173358	115820	39630	62157	85302	444532	737483	493642
	233	1.37924	30666	77961	171914	109221	39174	54002	80264	433282	755848	482636
	234	1.38519	26252	81300	167008	113247	39067	50937	80584	444637	760959	501090
	235	1.39113	26981	82321	172309	111362	41193	46607	82595	441306	767159	496755
	236	1.39708	32426	81364	166188	103019	39027	48089	83983	445581	780141	498070
	237	1.40302	32330	82611	167220	101013	41892	46285	111739	441968	795614	499491
	238	1.40897	34263	83887	164715	93160	38489	51092	172169	441610	786187	497292
	239	1.41491	35570	86737	165748	83968	41727	51741	245949	448375	813910	496120
	240	1.42086	36185	87609	165051	75582	38256	49074	297005	448985	811798	489333
	241	1.4268	38251	86450	167505	66969	38912	55550	281464	443046	830050	501211
	242	1.43275	34664	87861	167286	63916	38396	55640	226992	436182	812615	498227
	243	1.43869	40722	88489	167564	52458	43127	55550	156912	443666	834936	498490
	244	1.44464	42194	88878	165649	46333	37459	60833	117270	425126	823537	499288
	245	1.45058	43501	92110	168720	40677	42490	65543	101872	430366	826332	492252
	246	1.45653	45688	95174	164817	37859	38996	82731	100221	442539	818761	484582
	247	1.46247	47314	96153	168942	34245	37969	108378	97793	432874	818169	493549
	248	1.46842	48806	100945	168514	33525	38463	163139	100017	441504	811331	492993
	249	1.47436	48634	103307	169930	31469	37743	258742	107513	432274	808225	481527
	250	1.48031	50418	105397	170376	30055	42214	370358	104115	447403	803718	492298
	251	1.48625	56243	104689	174289	34283	42778	495163	110242	450249	813516	490717
	252	1.4922	58839	105423	174837	29121	38303	594198	113924	450257	815371	486647
	253	1.49814	61188	106318	177526	30202	39174	638037	116008	455830	827788	472791
	254	1.50409	59281	110292	175086	30761	37711	611517	122202	452760	834784	483868
	255	1.51003	64665	109785	177929	29999	38076	558858	127952	478285	833612	486844
	256	1.51598	69253	109863	182388	30728	38864	521194	134789	497450	838288	486951
	257	1.52192	68036	110912	181274	30522	41994	498777	142822	541989	839876	486260
	258	1.52787	71560	112307	184437	29833	42928	512247	150725	601727	844167	483830
	259	1.53381	73340	111432	188145	30280	42496	559915	158133	680861	822339	488188
	260	1.53976	76090	111174	189879	32649	40964	605530	165160	763142	840131	483865
	261	1.5457	74704	110100	189495	35079	39549	645657	176900	875010	836879	484454
	262	1.55165	75173	110823	190713	29222	43362	688244	185316	966108	828332	487544
	263	1.55759	81828	110812	193037	33670	39926	725121	193451	1034767	821936	488798
	264	1.56354	85123	107463	198445	30994	40092	706593	199125	1076625	832401	479130
	265	1.56948	83396	108280	200464	29500	44434	677099	206752	1106390	829306	487636
	266	1.57543	84167	108072	202342	33289	45061	658995	216080	1098015	837619	490483
	267	1.58137	83568	109067	203861	33997	43611	665670	224986	1041259	848610	488612
	268	1.58732	81726	108077	201648	30060	43420	681744	240156	946552	855994	489775
	269	1.59326	77117	111941	206785	29883	43807	712904	260837	871873	862301	487629
	270	1.59921	80611	112260	205755	30610	48423	751356	266400	770300	868785	485787
	271	1.60515	83842	103348	208044	30809	47167	743593	275344	671539	868642	487799
	272	1.6111	81697	116983	209226	33132	48743	664707	285131	604470	870089	475935
	273	1.61704	81871	119329	209525	32871	51630	533211	304373	546023	874558	490598
	274	1.62299	79760	116272	208530	29363	58153	381060	320359	501841	865852	469752
	275	1.62893	76760	114632	204594	31007	59750	255073	338842	491892	861034	490367
	276	1.63488	71918	111172	210618	31252	58573	170393	351849	482448	852214	485930
	277	1.64082	70131	106775	219367	31492	59156	123436	351603	520331	832269	490698
	278	1.64677	63309	101659	221239	34977	62120	99232	359346	557279	841427	478631
	279	1.65271	56060	96766	227325	31363	62940	89432	370602	645743	832654	485075
	280	1.65866	51378	91952	229041	31089	63268	77683	374478	741022	834490	487352
	281	1.6646	52034	86527	231232	34913	63166	70659	388448	886927	837982	484305
	282	1.67055	47166	82026	233830	34317	66634	68489	384827	1029514	839028	476855
	283	1.67649	45191	74032	238848	32315	64676	64523	387505	1165990	847104	483735
	284	1.68244	39828	71855	243934	31318	62814	57986	380313	1270400	854879	483053
	285	1.68838	41551	56139	242008	32493	61765	53869	370478	1326458	868322	484018
	286	1.69433	38297	55426	242559	31312	58733	50412	360916	1310938	871350	480260
	287	1.70027	37688	49947	243754	30887	59789	50594	345811	1238269	873235	468894
	288	1.70622	40347	42826	242941	33088	58182	46904	331084	1128065	874494	480700
	289	1.71216	39933	37108	247856	35760	54336	49369	304336	976656	871765	465987
	290	1.71811	38743	35218	250269	33680	54145	47862	277951	838942	864418	482457
	291	1.72405	35731	35744	249707	33777	54783	47401	256601	717940	858443	481445
	292	1.73	34240	35324	251409	33663	51928	50176	231910	632055	846656	480155
	293	1.73594	31976	35062	246787	34309	58153	49708	215505	555442	848843	480844
	294	1.74189	28235	35660	252867	37723	53108	54163	193450	517819	833070	483865
	295	1.74783	25955	31559	253122	35842	57555	51993	177072	510961	822356	482374
	296	1.75378	24708	30377	248742	36263	56837	54421	157688	497571	827418	483597
	297	1.75972	20763	30010	252629	41159	54795	56037	150931	489156	803354	481642
	298	1.76567	17410	34944	248597	37381	56248	57567	132322	475368	780924	483552
	299	1.77161	15651	31287	250629	37993	53886	63716	122731	482240	769466	471871
	300	1.77756	18051	35182	241520	38038	54792	64270	119612	471647	739528	472166
	301	1.7835	17209	35488	247050	38644	56794	71653	106490	473780	698474	468542
	302	1.78945	15621	33590	238458	40720	57133	71566	99387	473454	647554	479955
	303	1.79539	24481	36362	244527	39519	55686	77213	95301	477366	621248	479096
	304	1.80134	36308	36370	235326	40928	58927	83647	90636	475818	583167	476297
	305	1.80728	50793	33295	230416	43901	60637	90122	91626	470816	545559	467844
	306	1.81323	55167	33258	219297	42739	57787	104389	85747	476805	515469	480774
	307	1.81917	64504	34383	207609	44206	56358	112355	84048	476384	478260	481473
	308	1.82512	64409	34147	204537	47969	60764	125179	84621	473074	476140	474764
	309	1.83106	64476	38484	197285	47368	59886	134206	86428	476056	464066	481713
	310	1.83701	63865	38751	185675	46289	62063	156437	86417	463781	460110	481105
	311	1.84295	62394	38678	178698	48758	64495	168627	89442	475732	456495	480434
	312	1.8489	61262	35859	169014	46411	64677	188544	84917	480233	456961	483103
	313	1.85484	60356	35798	169000	49134	65043	211337	85089	486387	453898	485477
	314	1.86079	57480	35421	159455	48061	64378	233329	84383	512394	451235	481947
	315	1.86673	52255	40036	159889	47473	66135	256860	85746	540987	449790	464065
	316	1.87268	56908	41596	160048	51720	72731	291672	80269	571381	455025	468228
	317	1.87862	56619	37956	159861	53972	76161	320518	79947	635797	439684	477214
	318	1.88457	50147	41122	160054	51714	75574	357522	79410	686996	452866	474286
	319	1.89051	50785	39485	163247	56022	77611	393443	78059	723182	448965	465928
	320	1.89646	52280	38122	165498	52711	79040	429086	83370	735812	440199	479500
	321	1.9024	49335	41579	168971	51736	85822	462532	76256	706050	452830	463866
	322	1.90835	49005	42017	168812	51753	86377	493869	79657	678487	450920	477350
	323	1.91429	48253	43449	167073	52799	93061	518174	73867	622508	438100	467581
	324	1.92024	41965	39296	178030	54148	90766	538424	72446	579623	449598	481452
	325	1.92618	46258	44316	180951	51961	95049	544223	72386	541215	441256	477345
	326	1.93213	44870	43424	188707	52220	101907	538321	71019	501188	457866	469186
	327	1.93807	42794	44121	189712	56752	107197	512240	71987	498938	443045	479986
	328	1.94402	44625	43834	189864	52390	110074	467686	70641	478141	440907	477113
	329	1.94996	43143	40503	189372	56055	109068	414755	77023	491628	451840	466962
	330	1.95591	41234	46328	187847	53468	115650	348007	71532	484564	451066	464668
	331	1.96185	40953	41991	183399	51745	113498	279468	72146	472640	442731	479301
	332	1.9678	37352	46426	166795	50932	117862	221938	75800	472635	438289	477481
	333	1.97374	39584	45150	150070	53689	119911	168380	69934	480759	450482	471100
	334	1.97969	39821	41587	132119	52769	117618	123321	72729	475077	436430	481021
	335	1.98563	38324	45477	125411	52846	119990	94414	67838	480493	447450	467440
	336	1.99158	37051	43895	114097	57150	126530	74207	70798	473583	443695	463610
	337	1.99752	36425	41900	106951	58784	120887	65198	66462	488318	438137	470760
	338	2.00347	37681	45605	124721	54768	118762	55135	73954	507303	452102	478905
	339	2.00941	36317	43847	156390	56808	120456	54307	70471	534898	449973	483227
	340	2.01536	36310	43232	223426	51619	113545	48462	69718	574775	450928	469752
	341	2.0213	32130	41495	314656	50179	103982	50850	71676	637007	449517	484096
	342	2.02725	35490	47605	438144	49315	98410	45295	78308	700481	438870	488403
	343	2.03319	33492	46943	584381	46460	89788	48315	88049	756585	440257	486632
	344	2.03914	34344	46800	728535	45372	79696	46323	136972	814156	449770	478301
	345	2.04508	33698	47411	872871	48353	70137	45293	200697	846471	453102	481812
	346	2.05103	30718	43476	999039	46377	63959	43988	275656	871981	451633	485080
	347	2.05697	32388	42749	1135387	45636	59272	46794	285136	870533	451100	469011
	348	2.06292	32716	46918	1259732	42264	56493	43801	239182	824936	441567	470531
	349	2.06886	31454	45452	1383798	41674	55291	42218	175316	758879	452934	469763
	350	2.07481	27966	42424	1494651	39478	54828	43476	133991	707179	456408	483446
	351	2.08075	30751	43572	1593489	41662	55890	41849	113815	635244	456115	471635
	352	2.0867	29659	47735	1687061	41966	54935	41653	102458	574867	445203	482078
	353	2.09264	30016	47778	1761997	44804	56118	42270	93711	564768	448129	480574
	354	2.09859	25650	47031	1842114	48050	58024	40916	96609	559706	457980	470027
	355	2.10453	27560	48981	1901475	44634	64192	42013	91340	571077	457324	473663
	356	2.11048	24930	50624	1988841	45566	64205	51233	91580	613396	452209	481437
	357	2.11642	23770	51006	2063052	44157	64784	76100	102348	652421	457212	467505
	358	2.12237	28642	51803	2076851	47542	70326	122912	110306	709543	454138	478081
	359	2.12831	27676	48367	2139992	47834	77980	218259	138856	739798	440206	481991
	360	2.13426	23372	51058	2147899	48055	81119	364816	170164	760652	457113	485674
	361	2.1402	26427	46986	2179392	50472	81998	537411	207041	766368	452913	483080
	362	2.14615	26276	49504	2176607	53808	87086	746826	217202	741998	442542	486544
	363	2.15209	26830	46839	2150516	59584	92876	944032	226357	706516	456753	479292
	364	2.15804	23167	43023	2172606	57869	100884	1139083	200864	684830	455043	476305
	365	2.16398	22463	44566	2160572	60955	102728	1275777	162669	648871	452744	470396
	366	2.16993	26238	40778	2137059	68410	108823	1375922	135231	621547	443301	477482
	367	2.17587	25003	43412	2134211	66072	114705	1327273	107611	595881	456129	482549
	368	2.18182	26039	43428	2143326	67239	121093	1198149	96935	567311	454258	482827
	369	2.18776	21043	40952	2108039	69604	121723	940399	90401	546274	455637	468957
	370	2.19371	25799	38534	2036780	76873	130448	664118	88062	526843	441309	481965
	371	2.19965	25611	39245	1999092	74422	138677	402495	86557	502979	447413	469885
	372	2.2056	25231	41145	1957930	76481	145097	226739	84628	493147	457254	482589
	373	2.21154	25688	41814	1927855	82757	149489	131802	88017	485966	457314	475811
	374	2.21749	25476	38780	1915854	87072	154546	84940	81889	481428	462811	480905
	375	2.22343	25026	43089	1878653	84826	157229	67686	84744	484390	456961	481926
	376	2.22938	25026	43637	1861039	85367	157571	64196	80934	492095	462746	468023
	377	2.23532	25003	43048	1820768	88962	163880	61218	77478	500246	453838	481853
	378	2.24127	24658	43432	1787414	94139	155679	55379	77260	497107	466498	467766
	379	2.24721	24647	39750	1748542	95526	146036	56329	75057	523789	450153	482934
	380	2.25316	20720	40702	1719536	93891	136665	55168	75667	539108	455804	483231
	381	2.2591	20768	42163	1753485	94824	124241	56012	74651	568418	465529	478727
	382	2.26505	24279	45012	1741484	100608	111453	50929	75577	598940	464798	484569
	383	2.27099	20917	41986	1763779	96965	95623	51399	76974	631246	465168	482165
	384	2.27694	24357	47360	1779335	100173	87244	49221	75647	656875	450293	465465
	385	2.28288	23650	41744	1816157	106647	71734	48017	78149	704294	453159	474915
	386	2.28883	25033	47334	1875636	108512	62898	45455	75230	720563	464674	483144
	387	2.29477	20125	43529	1938524	107529	54548	46212	72148	766054	461464	471919
	388	2.30072	20814	43646	2004972	117030	49543	44155	73908	786359	451744	477667
	389	2.30666	24649	43188	2116685	117608	48731	45268	74668	817743	459629	468390
	390	2.31261	25061	48662	2161324	122851	48737	45311	74671	837099	446094	483966
	391	2.31855	20796	48116	2104505	122567	44029	45333	74164	828762	462799	480932
	392	2.3245	20506	46008	1891206	131769	44205	44200	76406	828008	454418	477016
	393	2.33044	24800	49016	1493571	137756	43791	44728	73961	785099	457815	481246
	394	2.33639	20689	49029	1035377	142137	45744	45839	74525	757156	446787	462969
	395	2.34233	21126	46921	634069	145872	44990	46685	76613	704932	458670	479617
	396	2.34828	24019	46777	368966	155877	45631	51875	74772	661279	455024	465253
	397	2.35422	23697	45640	233883	160890	46437	52542	78831	629335	448369	466851
	398	2.36017	20749	47822	170418	164696	47589	65845	76191	584449	460364	481386
	399	2.36611	22842	47661	139784	169615	49838	98828	73675	561835	455195	481864
	400	2.37206	24510	50539	124016	173093	54887	157131	76599	522623	458959	480968
	401	2.378	20528	49754	114801	181083	51875	236308	77579	514420	460651	470173
	402	2.38395	24117	52321	106835	181879	52431	353743	74549	506380	444019	470933
	403	2.38989	23771	49128	98382	185434	53105	485019	77918	493498	462275	484563
	404	2.39584	23109	54145	94457	195251	53490	612681	76119	496834	455758	486297
	405	2.40178	20705	54042	95250	198231	52414	682151	75707	514021	448003	474417
	406	2.40773	20627	50975	93803	214205	56428	659117	77367	510220	447965	486967
	407	2.41367	19982	55389	90990	216454	51167	527127	76684	508357	445816	482129
	408	2.41962	23448	53339	88056	220328	56196	365137	80725	495386	455127	479663
	409	2.42556	23244	58020	82842	229390	51710	219638	76776	480830	448204	500633
	410	2.43151	20317	56140	86115	230121	55422	140423	76440	457448	454479	504770
	411	2.43745	20266	52932	85654	238882	54617	101053	80712	431368	457932	507353
	412	2.4434	23374	54796	85552	245307	55486	85249	75203	428238	457794	513322
	413	2.44934	25181	60929	85707	249742	52668	78546	75542	412418	447606	516147
	414	2.45529	23751	60218	81517	252017	56017	77418	74911	402029	457152	527352
	415	2.46123	24202	59372	80900	261852	56690	79764	80236	400460	459940	536879
	416	2.46718	23103	60667	83710	263984	53081	72701	74875	395053	447120	549354
	417	2.47312	18917	64857	86551	265570	52790	68867	74888	396179	457695	542509
	418	2.47907	19662	66141	83832	263839	56689	68488	74565	402724	455143	569545
	419	2.48501	22524	66022	86820	271469	50970	59327	80905	398927	456125	576788
	420	2.49096	24653	67617	87394	265059	51261	56130	77498	398058	460051	579161
	421	2.4969	19221	66958	90516	261622	52509	53582	78643	400827	443792	607661
	422	2.50285	22550	65600	86237	255364	52773	51115	82562	404835	445150	610931
	423	2.50879	22795	69752	92146	241588	54922	50568	83706	397809	452812	640929
	424	2.51474	22183	68704	92218	225639	55700	49749	87099	403331	458388	657801
	425	2.52068	22575	70213	93008	206088	49337	52521	88904	420129	445286	677317
	426	2.52663	19624	76885	88772	181419	48301	53188	86996	427338	443143	701727
	427	2.53257	23845	76424	89256	157288	53401	51908	87411	447604	449612	721138
	428	2.53852	23146	73993	90876	126144	48218	56219	86515	459612	457888	732410
	429	2.54446	22734	75529	93005	108245	48455	61702	84481	462441	459757	754669
	430	2.55041	19192	75695	93165	88187	52648	61967	82138	476979	456616	783710
	431	2.55635	18886	82222	89402	70617	45165	64690	86326	477059	459364	800673
	432	2.5623	18757	82761	93784	56007	50056	70240	80699	469801	459488	796033
	433	2.56824	22084	81913	87305	49036	46862	68318	80793	455986	445726	820685
	434	2.57419	18661	86146	93573	44572	51943	69454	88152	431718	466614	829340
	435	2.58013	22536	95908	95654	45817	46010	68533	83003	425260	447704	832772
	436	2.58608	22813	96752	94352	50450	46298	71562	88817	413794	452940	847375
	437	2.59202	22265	94859	96366	47417	49100	62098	84255	416294	462007	852352
	438	2.59797	21842	99747	98932	51108	45440	58027	82604	404486	463726	858708
	439	2.60391	23160	94070	96929	49850	46248	55478	87138	408352	465649	849369
	440	2.60986	22263	95578	105189	46927	47360	51822	87581	409478	465117	849944
	441	2.6158	20584	93292	106204	46373	46687	50501	91270	423478	461058	832629
	442	2.62175	21447	98010	110911	41820	49849	52447	95699	413286	449040	829250
	443	2.62769	21231	95966	112940	43499	46673	51463	102605	420943	449953	798019
	444	2.63364	21079	95937	108819	37637	45556	47145	110083	417326	465344	783255
	445	2.63958	17923	97695	112430	40434	46884	51602	106308	443814	462989	759302
	446	2.64553	17684	100711	109594	35520	50337	47213	100076	460115	461749	726484
	447	2.65147	20704	99886	108327	38213	48505	48721	99052	480700	464492	694862
	448	2.65742	20666	104671	105844	38133	50300	50360	93391	505366	453438	672441
	449	2.66336	19655	102922	109715	32782	47007	46287	89251	521249	451179	645081
	450	2.66931	16870	108071	103233	33443	46365	45553	92013	531827	465813	609085
	451	2.67525	20484	109435	102395	34280	50298	50705	87352	528459	463089	600586
	452	2.6812	17850	113348	100555	32691	46952	47780	86733	500744	462974	571604
	453	2.68714	19904	114659	103194	33092	47970	47727	91082	494056	468094	556850
	454	2.69309	16690	110128	102892	36379	47332	48700	91507	466252	462719	553685
	455	2.69903	16534	116195	102922	31709	47546	49063	84895	451802	466983	545992
	456	2.70498	19757	118770	104741	31752	46265	52218	83915	433776	454584	518605
	457	2.71092	16078	120089	107968	32100	50194	55849	90006	430264	460499	517880
	458	2.71687	15757	123042	110164	32166	46715	58092	84009	433834	462603	520680
	459	2.72281	16307	122092	110601	32239	46162	65461	85231	438964	468044	505742
	460	2.72876	15426	123691	116578	34403	45245	67486	84473	437349	462998	487867
	461	2.7347	20086	128011	120046	31275	50783	71321	84762	452872	465204	494212
	462	2.74065	16229	127903	121839	31280	45867	83685	84250	462399	466634	479780
	463	2.74659	19475	128705	127443	35041	49241	84616	90323	480654	455363	493705
	464	2.75254	19073	133167	122861	31224	48942	88948	88127	494718	461830	484612
	465	2.75848	20129	130931	127978	30967	44320	94004	88047	504890	466913	489444
	466	2.76443	19472	133834	118838	35049	43424	93815	90347	490364	465496	469319
	467	2.77037	16585	140538	116077	34974	44238	91433	88242	498119	465465	469395
	468	2.77632	16427	141460	108085	33145	44444	86304	88154	497712	463694	480704
	469	2.78226	18964	144407	107257	35781	50290	75663	86015	506157	466444	478912
	470	2.78821	19409	150153	96665	37347	44433	68522	88093	502182	466231	468528
	471	2.79415	20512	151568	91234	32660	45070	64195	92049	512034	463728	480089
	472	2.8001	16381	152578	89791	34692	49407	64155	88365	530172	453470	481125
	473	2.80604	19266	150814	84194	35494	48669	67968	87830	527526	449765	464702
	474	2.81199	19985	155283	80537	32375	48228	79669	94799	527008	460506	466412
	475	2.81793	18747	159370	75320	36269	45073	115052	88597	512753	464962	481282
	476	2.82388	19749	156891	76927	37896	45299	206925	85244	499335	463666	465509
	477	2.82982	14997	159386	77420	38102	45000	378067	89605	507152	467719	466411
	478	2.83577	19281	167003	76064	33962	48451	654887	88818	499910	465545	478294
	479	2.84171	19393	167524	76750	36852	45321	993119	91876	494341	466331	476984
	480	2.84766	15710	173388	73994	35463	47494	1364004	88946	491689	449489	468209
	481	2.8536	16381	177721	78280	40928	45543	1688569	88159	479139	464125	471824
	482	2.85955	19069	174197	72553	41750	48070	1863888	87186	463178	463940	476421
	483	2.86549	19676	178060	73699	41782	46132	1873439	87416	442407	461166	475535
	484	2.87144	19056	185179	75603	39687	45743	1597451	87146	440140	450047	476565
	485	2.87738	15437	187173	79916	42146	47363	1162188	91136	432627	452068	478394
	486	2.88333	18861	183885	79933	42520	48245	755117	93321	424051	461252	472678
	487	2.88927	19566	186617	74800	43891	46413	508067	88222	420932	458672	476341
	488	2.89522	19424	191329	79186	45106	50837	372982	89190	401461	456401	476714
	489	2.90116	18937	197890	73775	50080	47827	308803	87154	405489	462366	463030
	490	2.90711	15416	199982	78482	49837	52034	270720	86732	417237	457110	463569
	491	2.91305	18675	206634	71570	50441	48740	233760	90212	411839	444895	468305
	492	2.919	15453	209005	74107	52865	52212	219030	88513	397867	462213	459461
	493	2.92494	15751	215080	77498	56191	47557	265425	92764	410377	453810	476196
	494	2.93089	16051	211829	72675	58137	48924	392177	87828	398259	443711	473895
	495	2.93683	19120	215132	77663	60149	49336	611896	88110	402123	451217	467697
	496	2.94278	14868	217947	72815	63431	51685	940148	90480	406186	455639	470900
	497	2.94872	18739	220212	74681	69397	53598	1288926	91977	428580	458637	458434
	498	2.95467	19516	225304	77488	73339	53297	1518135	96100	444018	442975	470607
	499	2.96061	18898	227019	75135	76249	53333	1556060	90848	470857	455288	471894
	500	2.96656	18481	234723	73397	81748	60546	1275821	97838	493401	455288	469552
	501	2.9725	15960	250624	71335	86288	61006	880466	90654	516643	446784	473561
	502	2.97845	17685	261329	75767	86800	67233	498754	93152	527048	441869	477959
	503	2.98439	19662	284951	76701	92213	66755	257879	96912	526775	445605	474682
	504	2.99034	17421	308084	74804	104273	70061	141159	97137	500558	445956	469086
	505	2.99628	15128	343359	79332	106754	71788	98484	90140	492451	460584	472229
	506	3.00223	18654	391262	79771	111666	65822	82482	94635	478497	443754	473422
	507	3.00817	15591	442115	78867	114651	60561	77228	95965	457852	446883	473323
	508	3.01412	19077	500041	84036	124540	57747	75784	91947	446207	451658	474335
	509	3.02006	18625	557639	80789	131796	54844	73782	91554	433388	460118	477558
	510	3.02601	15175	611929	85263	139366	52173	72880	90621	428040	464566	475236
	511	3.03195	18462	683544	82896	138881	51282	73824	93782	421326	457298	471684
	512	3.0379	15200	769149	88121	150973	54053	76057	92744	419311	463054	456093
	513	3.04384	18062	865436	82234	155392	54686	74911	94896	407234	462317	471266
	514	3.04979	15845	979279	86310	158635	49848	76046	96852	420316	456808	474832
	515	3.05573	18186	1147451	88081	168169	51608	75327	99099	404929	463097	477363
	516	3.06168	18281	1326774	84176	171447	51010	77234	105591	417307	451302	464425
	517	3.06762	14268	1541452	83174	178947	53333	72145	104788	414570	466175	476327
	518	3.07357	14192	1737334	84901	179565	54186	69702	108978	416617	463978	474774
	519	3.07951	19059	1882154	84517	182615	54085	68665	105235	417472	462947	470968
	520	3.08546	14909	1849111	84696	186922	57412	65466	107583	414519	450971	474741
	521	3.0914	15036	1688477	87888	189104	58794	62345	105120	413634	451743	459182
	522	3.09735	15473	1362020	84038	187758	60901	61086	100120	405275	465537	467543
	523	3.10329	17938	1020397	87352	188020	63709	58928	99222	417385	463184	462554
	524	3.10924	15139	773690	84669	183533	69986	57893	100220	418800	462699	464225
	525	3.11518	15793	634796	88279	175891	70354	58363	111183	417587	460505	474956
	526	3.12113	14634	567146	88277	167429	76960	57308	112841	422328	466359	471338
	527	3.12707	18681	541249	87037	153716	89072	61719	116751	417642	465295	458651
	528	3.13302	14931	542222	84740	142994	96497	58281	126861	423489	460631	459820
	529	3.13896	19258	542108	88329	132314	108414	59562	124950	417750	466497	460641
	530	3.14491	18594	551839	87723	121975	123346	63827	124306	418606	465984	474022
	531	3.15085	17932	562569	87934	101696	143072	60657	116295	418221	465998	477607
	532	3.1568	17735	571508	87939	93311	173449	62274	109075	421873	451960	475721
	533	3.16274	18298	575442	86945	84079	200049	61688	106296	428136	465998	473939
	534	3.16869	14885	590663	81734	72776	229389	65561	103509	427908	462329	480739
	535	3.17463	15249	598255	82549	63603	270056	63680	101677	432303	464678	478568
	536	3.18058	17572	609138	80768	55403	310993	63015	100549	432341	466105	483155
	537	3.18652	17922	610365	82822	54032	351254	62247	100649	432638	452380	487190
	538	3.19247	14845	625424	83287	44338	405199	59277	100821	424166	467838	494509
	539	3.19841	17403	632813	83527	39581	464432	59736	108234	426474	467664	507098
	540	3.20436	15039	644063	88957	37933	526046	59899	102830	441719	466825	529586
	541	3.2103	18765	646054	91788	37852	603609	57408	108663	441650	457794	545880
	542	3.21625	18170	648797	92829	36796	682589	56740	103559	428023	469956	603427
	543	3.22219	18140	664642	96151	36230	766007	58110	103040	440380	467462	664765
	544	3.22814	14760	681287	93719	31130	860151	57687	105581	441432	466229	711218
	545	3.23408	14714	698794	92807	31524	936490	58636	110021	440243	470201	774336
	546	3.24003	17649	726572	96017	33100	1008287	58826	103297	440925	470218	846111
	547	3.24597	17902	761609	92956	32854	1053762	64415	105965	424175	473530	902905
	548	3.25192	17120	792337	97516	35378	1075882	60620	111606	435614	474288	933248
	549	3.25786	17899	823321	96355	32253	1050730	61863	104095	433972	469918	959481
	550	3.26381	18751	851602	101601	33200	1016213	63918	110399	419925	459836	956474
	551	3.26975	18747	864919	104923	33160	924117	68137	108922	426090	458104	932619
	552	3.2757	15325	883755	101810	36100	809025	76201	104961	421604	469041	886727
	553	3.28164	18460	894688	108902	37063	681643	73577	112476	412205	463396	830940
	554	3.28759	18377	897793	104282	33981	541196	80955	102932	422034	464629	775014
	555	3.29353	14518	916790	107706	37820	415002	82306	103557	409884	453783	699901
	556	3.29948	14886	931151	107248	35806	307333	87337	104085	418681	464441	632469
	557	3.30542	14905	948318	112535	39245	213304	89410	102369	419651	466939	578185
	558	3.31137	18913	955362	110790	37392	154532	87627	102900	413302	471715	552992
	559	3.31731	18556	961040	119864	38788	107170	84635	104810	417687	466466	508733
	560	3.32326	14765	969885	115373	38959	81002	84655	104790	415952	467634	493640
	561	3.3292	17975	979474	116958	35564	67335	76534	108479	402189	457365	486580
	562	3.33515	18690	985106	123845	36573	60105	70784	104576	414391	471337	468343
	563	3.34109	17708	985410	118824	37007	58045	64016	110940	415997	470914	475713
	564	3.34704	17657	986809	127308	39121	51978	59392	107850	417278	459107	477594
	565	3.35298	15117	982927	127487	43661	51518	60506	105073	413734	460754	462244
	566	3.35893	18081	1006183	130239	44132	54360	58187	105145	418329	474702	462171
	567	3.36487	18441	1011333	129962	40716	54659	59497	105076	414920	466096	473816
	568	3.37082	14406	1012757	133155	41169	54951	53174	105862	421368	477453	465798
	569	3.37676	14344	1015593	135100	41672	50007	55115	110543	417072	485274	474995
	570	3.38271	17954	1027031	136175	41734	50268	55705	106189	417956	476477	476462
	571	3.38865	15182	1023143	136545	45702	48594	55525	109818	418425	493528	461252
	572	3.3946	14939	1029220	138135	46756	48924	55738	105077	424390	488796	477265
	573	3.40054	15480	1028419	139219	50590	50501	55736	109831	426787	492533	473220
	574	3.40649	14990	1050881	136628	48286	52142	57295	104212	418952	488568	461629
	575	3.41243	14526	1080762	140202	49158	49850	57320	104385	415446	483636	479233
	576	3.41838	14508	1107156	143076	49579	50698	60386	104839	428530	485211	476621
	577	3.42432	17699	1150108	142320	51438	53516	57347	105199	431980	472718	475719
	578	3.43027	14615	1182711	147735	55460	55668	58259	106965	416943	477843	477102
	579	3.43621	18063	1210975	148806	50051	59720	61908	107222	418552	467218	476939
	580	3.44216	17769	1224513	153167	49811	63750	58577	107428	428754	474702	467274
	581	3.4481	15018	1210373	154380	49504	65538	57396	109193	430108	473128	481404
	582	3.45405	15284	1171858	160742	53446	64042	59168	114359	433467	471072	469350
	583	3.45999	14925	1119435	166016	53756	63427	59039	109385	435346	457876	465400
	584	3.46594	17474	1052262	169487	53267	62955	55585	109759	436604	473290	468518
	585	3.47188	15506	960542	175782	50001	63476	60836	116670	443663	468130	478384
	586	3.47783	14954	883769	182583	54914	56631	55292	111764	451880	472818	466259
	587	3.48377	17930	790104	184486	52850	56196	55266	111369	454859	472862	476120
	588	3.48972	15417	706869	191519	52785	54154	55270	111492	444429	473058	477944
	589	3.49566	14812	621362	189509	54291	53669	54992	110179	445514	478314	476725
	590	3.50161	15308	534812	188998	54909	52373	55876	113661	452962	475208	477278
	591	3.50755	15318	467509	181138	56542	52476	56441	111647	439468	464242	463483
	592	3.5135	19183	406811	171462	61726	55569	59824	109729	451272	484132	469380
	593	3.51944	19259	350866	156625	61546	55329	56685	113812	440420	478335	477949
	594	3.52539	15945	317531	140620	60332	51102	58653	117704	435934	481172	462625
	595	3.53133	19043	299201	119691	65970	53524	57933	112926	434663	479770	475721
	596	3.53728	18862	271934	104825	64359	53044	59191	120790	428335	478519	473122
	597	3.54322	18903	266396	91851	68121	52631	57008	116830	428140	476259	475486
	598	3.54917	17930	256788	84862	71680	53054	58804	116123	432945	470982	476773
	599	3.55511	19120	248936	71980	67621	53427	60992	121516	429615	470122	475297
	600	3.56106	19366	238581	72438	68196	52245	66172	112342	429834	458088	478847
	601	3.567	15542	240218	64713	69971	53053	62839	114662	434501	471153	478362
	602	3.57295	18943	236731	65434	74069	59365	61571	121931	425706	469540	470846
	603	3.57889	18701	233275	61796	77034	59468	61800	113705	428513	464924	466572
	604	3.58484	17094	233530	61663	76083	57361	64673	116926	424473	482535	475543
	605	3.59078	19513	236653	65564	79021	60895	62809	117793	426914	473108	476867
	606	3.59673	19112	235533	62673	79542	59357	62093	116931	416995	477033	473778
	607	3.60267	16409	235521	61384	73648	63605	62211	121017	421774	482939	477677
	608	3.60862	16385	235505	62361	74298	62472	63795	117323	422140	503168	474802
	609	3.61456	16323	234501	63370	75451	63884	66372	123304	423204	491208	461282
	610	3.62051	18097	231587	68395	73058	67124	69187	116532	421836	500210	477397
	611	3.62645	20102	235374	66964	78883	69954	68734	119319	423007	505558	474053
	612	3.6324	21088	230199	67798	76939	72725	70987	126807	415867	516113	475717
	613	3.63834	16475	231435	66689	77965	75349	72008	121737	419203	513132	478454
	614	3.64429	18932	233183	64731	83358	79653	77960	125095	423186	507730	475965
	615	3.65023	20858	227279	63570	81208	83602	86721	127182	429553	508698	478942
	616	3.65618	21316	235401	68198	78904	82560	92198	131439	431268	500211	475141
	617	3.66212	17428	233580	69221	80187	84426	106097	129120	428687	484952	464151
	618	3.66807	21512	236076	64852	83174	88966	120078	125557	429885	490545	474761
	619	3.67401	20954	235943	66075	84065	90648	143116	122540	429244	486917	482052
	620	3.67996	21121	243603	66255	79346	86973	162937	123299	424962	487807	480736
	621	3.6859	21524	239632	67436	81651	91164	190794	125632	431596	464030	469801
	622	3.69185	21482	247877	69274	78230	87701	219443	121996	421934	475240	477288
	623	3.69779	18095	248420	73113	75302	90136	255308	123947	428009	475117	484497
	624	3.70374	21343	255101	74069	80204	91802	292927	129204	429253	470031	467910
	625	3.70968	18648	278189	71935	75628	91965	327661	125358	430532	457625	464762
	626	3.71563	21322	298141	80201	79392	95023	340829	125659	426970	454992	470533
	627	3.72157	21566	316148	85722	80971	102070	358478	127551	423937	472687	479455
	628	3.72752	19065	347733	92612	78708	111874	346483	129984	426804	474910	481706
	629	3.73346	18399	362720	111584	80968	127232	320179	127643	427898	476769	483974
	630	3.73941	21536	367899	134389	82260	148120	270682	128323	408277	489378	480194
	631	3.74535	21792	358804	162942	84984	178242	222912	126305	409877	491682	480743
	632	3.7513	19035	340446	186507	90869	212540	179460	125850	425389	487020	481670
	633	3.75724	22129	304898	209605	94366	252132	150149	123573	425375	510807	467153
	634	3.76319	22656	288745	220954	98776	284947	127698	132743	417344	504022	480399
	635	3.76913	21374	268479	213736	103116	294310	115411	128088	416077	516055	482034
	636	3.77508	21932	255817	200207	109345	296381	119197	134143	413129	537004	481472
	637	3.78102	20306	248193	176332	117369	273274	127036	129010	421130	544472	469009
	638	3.78697	22724	245535	156771	121278	229099	148509	134197	426243	534972	465108
	639	3.79291	20226	240026	131012	120857	181133	164818	130925	422932	544239	469858
	640	3.79886	21248	246459	123427	124747	145177	184326	129978	423488	536722	480441
	641	3.8048	19399	245436	113713	128438	121241	210267	127748	427044	530569	482126
	642	3.81075	23774	243126	103578	127519	103889	226480	127654	428821	515556	479112
	643	3.81669	22876	243364	100142	132044	100406	245476	130929	427946	497720	470147
	644	3.82264	19817	242384	88214	129940	94944	250750	127987	418422	503182	478185
	645	3.82858	20299	246788	77349	138713	86345	238256	134251	417789	495859	466453
	646	3.83453	19817	247326	71415	131019	84956	222781	129165	432178	495845	481178
	647	3.84047	22809	242282	62834	129201	84908	191169	129625	419003	474684	481481
	648	3.84642	19752	247339	54371	132597	82879	165187	133664	440937	475520	484027
	649	3.85236	19954	243482	49832	132703	88857	133162	129972	436145	485266	469698
	650	3.85831	22833	247798	43454	125678	88925	108179	134624	432219	480824	478184
	651	3.86425	19397	241998	42873	118209	91676	92575	135388	445079	489915	477815
	652	3.8702	22416	243579	41941	110106	95020	81157	136215	450022	490794	477557
	653	3.87614	22807	239787	41613	104848	93949	73780	142426	456275	498674	465266
	654	3.88209	22455	245217	41023	90247	92612	67317	137484	461179	503324	467146
	655	3.88803	19539	243506	41570	79852	98463	67580	137357	485473	488462	467494
	656	3.89398	19920	243200	43324	72676	96526	62737	135348	503715	487084	466076
	657	3.89992	23650	247375	41048	61146	97363	62651	142548	514106	487309	464717
	658	3.90587	23561	246605	44469	49464	100016	60840	135673	544092	498243	481130
	659	3.91181	21048	251391	43617	44254	105032	63496	141430	569140	497412	475002
	660	3.91776	21135	247329	40531	39052	104760	61604	134759	589238	485391	473196
	661	3.9237	24927	249648	41124	35871	106454	62086	136891	611575	480394	479870
	662	3.92965	24392	249300	44043	34557	104155	57841	148316	635780	474269	466649
	663	3.93559	23489	244257	46210	31287	105501	59302	140197	674774	489876	476177
	664	3.94154	23150	248605	42443	34488	102902	57395	142261	712935	469028	479282
	665	3.94748	22655	251822	42544	32717	116297	59645	145034	730806	483571	479707
	666	3.95343	20341	254261	44611	29330	134801	61320	146258	776607	462751	482066
	667	3.95937	23323	253185	43651	31089	179669	65045	141563	805704	476557	482066
	668	3.96532	24207	245349	47652	29622	243832	62711	141261	838827	479492	482066
	669	3.97126	22528	247545	44198	31214	337209	66290	139636	872379	476066	482066
	670	3.97721	22665	251534	45310	31846	452201	71980	144764	880111	463059	482066
	671	3.98315	19791	252786	44000	31245	601367	86032	138058	888585	477981	482066
	672	3.9891	18471	252712	46856	34569	748267	90372	140074	898351	484349	482066
	673	3.99504	19812	250262	42055	37044	955605	108600	146996	883241	481922	482066
	674	4.00099	22368	251545	45379	43754	1131949	133188	147331	861094	482720	482066
	675	4.00693	22505	251467	42915	46866	1309358	161440	140918	828015	486490	482066
	676	4.01288	21950	252393	45734	47070	1529185	205356	148293	798431	489817	482066
	677	4.01882	22454	246595	40696	47500	1767782	252075	142671	759696	493690	482066
	678	4.02477	21918	256493	41140	46989	1944556	313717	150448	714393	492815	482066
	679	4.03071	19464	254721	44154	50711	2226664	392762	148309	688304	491765	482066
	680	4.03666	22680	258499	42021	48463	2422949	464564	144623	658460	481766	482066
	681	4.0426	21034	254413	40515	44775	2623767	554955	149861	633598	487171	482066
	682	4.04855	22803	250885	40724	39797	2834995	639256	142904	607054	487372	482066
	683	4.05449	20758	259747	39426	38745	3082116	705562	144357	580831	487501	482066
	684	4.06044	23198	259247	39339	36034	3227774	769969	148624	553925	483118	482066
	685	4.06638	20466	261109	38943	36895	3492051	774981	146447	531224	488122	482066
	686	4.07233	24203	255593	40773	37663	3677025	759545	144519	496960	485690	482066
	687	4.07827	24656	259013	42105	34330	3891295	670749	151585	490230	485612	482066
	688	4.08422	25037	252952	42432	37272	4048782	543940	146832	463544	479081	482066
	689	4.09016	21933	255521	40740	35059	4159199	407178	146809	463828	480396	482066
	690	4.09611	26017	256293	42185	34088	3969860	285436	146218	447236	501731	482066
	691	4.10205	26826	261426	38118	34476	2598058	186875	147332	443994	491343	482066
	692	4.108	26754	258063	38284	37865	866607	126725	145704	434463	502713	482066
	693	4.11394	24421	255956	39654	33270	241488	86238	154223	437724	499526	482066
	694	4.11989	27438	256432	41875	32491	133316	68255	148270	420919	510006	482066
	695	4.12583	25116	257272	41941	31559	120111	58291	146690	428373	518531	482066
	696	4.13178	25731	252300	42089	31698	108475	58127	149526	423877	511031	482066
	697	4.13772	28058	249514	40036	31939	112022	55610	155536	427975	517956	482066
	698	4.14367	29240	252791	43042	34464	101449	57080	148653	423122	528220	482066
	699	4.14961	25527	253571	42411	30084	99303	55600	155813	419442	536963	482066
	700	4.15556	27144	256196	38727	30296	98218	57928	155074	421596	532915	482066
	701	4.1615	28446	258690	38050	31393	93371	55085	150463	411279	547064	482066
	702	4.16745	29245	260605	35613	30129	94748	55176	151067	421397	537128	482066
	703	4.17339	27979	261172	40209	30279	90792	55685	152425	420421	539809	482066
	704	4.17934	29323	257603	38247	30365	90601	53791	153148	423141	533520	482066
	705	4.18528	33849	264754	35931	29922	87258	53375	158086	420730	538866	482066
	706	4.19123	34042	268426	36022	30415	89627	51927	154788	420123	536682	482066
	707	4.19717	34418	270432	35507	29714	86051	50983	165410	420797	530096	482066
	708	4.20312	31532	272207	34073	30422	88703	49747	163411	418908	532585	482066
	709	4.20906	35283	275993	33205	29564	86509	49992	158421	422469	539338	482066
	710	4.21501	33563	276699	34765	28491	88157	48919	162564	422779	544447	482066
	711	4.22095	37482	279763	35517	32531	92038	50018	158230	421635	547243	482066
	712	4.2269	34456	282083	36204	29797	91488	51054	160292	410270	537905	482066
	713	4.23284	38289	283048	41146	30206	87717	48142	167149	425276	558266	482066
	714	4.23879	36145	281796	50837	29928	91070	54080	160015	429247	569568	482066
	715	4.24473	38692	295320	72178	31493	93376	50310	156963	432825	571488	482066
	716	4.25068	41839	298304	117988	29432	93588	50394	160779	421281	568170	482066
	717	4.25662	38352	306589	194559	29690	92523	50624	163661	433099	564311	482066
	718	4.26257	39976	302576	301027	33851	95897	50556	161998	420758	558193	482066
	719	4.26851	44561	300598	443424	33070	102679	52516	163796	432501	557779	482066
	720	4.27446	43201	298292	639082	31037	102924	56693	168986	428369	538798	482066
	721	4.2804	41663	292369	860696	31909	105211	53418	168515	429868	531311	482066
	722	4.28635	45647	298942	1106996	30960	112892	52490	166983	430042	540708	482066
	723	4.29229	49115	308116	1372197	35598	119637	55718	164844	424339	543404	482066
	724	4.29824	48989	314473	1640355	32830	133546	55516	167878	430251	545333	482066
	725	4.30418	50311	324119	1907248	35869	140420	61068	162701	416046	560372	482066
	726	4.31013	48907	329358	2122160	33569	151728	58092	163909	434893	560053	482066
	727	4.31607	49657	342788	2244068	32935	166694	63023	166435	430050	564320	482066
	728	4.32202	52071	346837	2111591	33527	177204	62877	170587	420078	589598	482066
	729	4.32796	53135	353174	1658996	34730	191752	62304	168799	430998	597253	482066
	730	4.33391	54292	361132	988890	34973	203401	70816	176931	431869	580889	482066
	731	4.33985	55398	369005	480895	33441	217427	67705	172783	433245	594509	482066
	732	4.3458	61956	371593	228235	37892	217198	70458	168906	431925	590328	482066
	733	4.35174	60799	371755	125984	35097	217089	72414	172005	427342	575775	482066
	734	4.35769	65096	374358	101074	35648	211690	73780	170682	420951	582893	482066
	735	4.36363	67139	370518	90300	37859	205444	75413	178716	430984	588162	482066
	736	4.36958	71903	367642	82437	41206	193335	77398	171082	425803	587049	482066
	737	4.37552	74521	345867	81034	45958	180120	74801	177830	425052	596348	482066
	738	4.38147	77639	318455	72888	54746	164505	75604	173579	420540	598353	482066
	739	4.38741	77602	291866	71383	53821	146978	74308	178393	420954	627987	482066
	740	4.39336	81905	260436	74020	57163	127700	70512	180111	427232	636080	482066
	741	4.3993	81165	249064	68608	58997	112777	67567	170751	406970	636473	482066
	742	4.40525	86434	250069	68742	63690	104525	68806	171559	410834	647906	482066
	743	4.41119	88856	286737	68966	63526	96629	59560	174611	410303	640760	482066
	744	4.41714	96653	370087	61282	63901	87457	57913	171954	408324	624973	482066
	745	4.42308	100546	505238	61360	60359	79201	57804	180191	418517	587346	482066
	746	4.42903	102952	690305	62606	61859	79104	58777	172307	407175	581682	482066
	747	4.43497	104319	931899	57151	61451	69220	58534	173970	414047	556212	482066
	748	4.44092	107267	1183554	60969	65750	65683	54250	180067	416263	535409	482066
	749	4.44686	108813	1450914	60864	62608	69094	53085	175185	411316	514422	482066
	750	4.45281	109934	1704714	58299	62810	63459	51937	177674	419980	519805	482066
	751	4.45875	109619	1981594	53605	62247	60694	50067	174985	409776	508124	482066
	752	4.4647	113687	2248417	55315	63299	63734	49819	181314	408816	503688	482066
	753	4.47064	112937	2530198	50025	61361	62062	49603	183468	408893	490774	482066
	754	4.47659	110273	2758857	53748	61568	61828	50029	173846	404178	500352	482066
	755	4.48253	110383	2995552	49540	62647	57436	49928	176344	417528	495813	482066
	756	4.48848	106503	3200187	50270	59550	57357	50353	182608	413637	493633	482066
	757	4.49442	106369	3362306	50142	59486	58543	49143	178523	420435	494928	482066
	758	4.50037	108302	3549640	45284	57681	59447	49315	177216	419942	480249	482066
	759	4.50631	106142	3796584	45305	57572	60123	49894	182994	425622	485700	482066
	760	4.51226	103892	4044925	44216	55715	55874	48841	185344	424354	483252	482066
	761	4.5182	101068	4220241	42507	59048	56617	49151	188004	420924	468317	482066
	762	4.52415	96821	4396847	44742	58100	58525	49956	184057	409476	482302	482066
	763	4.53009	96224	4470467	40234	54766	57396	54071	182778	412542	480532	482066
	764	4.53604	91986	4498949	39782	53973	58565	53488	185291	410621	480038	482066
	765	4.54198	91546	4358294	43158	52699	61620	51993	186814	424096	478624	482066
	766	4.54793	90509	4019381	42670	52123	57181	49591	187709	421752	485944	482066
	767	4.55387	86851	3421127	37568	53471	57664	49007	192458	421612	490987	482066
	768	4.55982	82436	2657482	39473	53788	63283	51149	188963	410053	482169	482066
	769	4.56576	77285	1956231	37610	44967	56993	51332	187959	419730	498874	482066
	770	4.57171	72508	1467212	37141	47045	58771	51962	186123	414938	505874	482066
	771	4.57765	67544	1158497	37089	44687	58096	52985	187502	431637	489790	482066
	772	4.5836	62513	948920	39273	40424	59275	55776	187030	419804	501184	482066
	773	4.58954	58433	807306	39246	39110	61327	56433	189400	411860	503271	482066
	774	4.59549	52158	702018	40213	41247	59689	57056	188934	423080	486738	482066
	775	4.60143	51031	620322	35781	42769	57123	61024	189235	428834	485184	482066
	776	4.60738	46216	544906	35717	41126	58290	57308	193557	428004	495490	482066
	777	4.61332	42638	486861	35326	46007	59181	55798	194448	423954	491238	482066
	778	4.61927	44333	438555	37534	46073	61865	56289	188274	425419	486389	482066
	779	4.62521	43468	406861	38867	49279	68677	60817	194026	429632	490200	482066
	780	4.63116	43270	372207	38051	54353	69601	58642	186498	428939	497559	482066
	781	4.6371	43541	338870	35064	55538	68275	59733	196731	427792	501013	482066
	782	4.64305	42076	312660	37799	54477	70256	61014	197174	430189	501017	482066
	783	4.64899	41610	284458	34451	58346	69442	61888	196426	429776	507087	482066
	784	4.65494	41060	263109	34219	61063	65939	64306	195130	414754	510282	482066
	785	4.66088	40753	239389	34553	57912	68941	62744	197602	424220	527300	482066
	786	4.66683	39812	225921	36905	60641	64426	68836	193802	425438	527630	482066
	787	4.67277	37160	211464	34231	62452	63926	65213	192880	429004	520567	482066
	788	4.67872	40019	198041	34639	67680	61646	68447	202781	417717	530676	482066
	789	4.68466	40148	181766	33993	66485	63185	68043	195997	420537	518611	482066
	790	4.69061	36834	168494	33993	68141	58393	64259	202586	414510	498139	482066
	791	4.69655	37382	157270	37998	71697	58862	67986	197886	417416	506825	482066
	792	4.7025	35646	150956	37590	75885	59263	61831	205671	428196	496733	482066
	793	4.70844	33694	141715	33265	80040	57740	61620	198454	417645	490525	482066
	794	4.71439	37384	129550	36205	77666	58923	59295	208521	426714	475804	482066
	795	4.72033	35711	121234	32907	81959	58597	58694	201273	430132	476836	482066
	796	4.72628	34389	110396	35342	84927	59068	57232	208636	428835	494375	482066
	797	4.73222	35370	101933	31968	89260	65276	56813	197509	415059	494843	482066
	798	4.73817	34675	97773	30998	93811	60448	54237	208020	428691	501452	482066
	799	4.74411	34807	93097	30475	98137	62500	52606	202060	424753	505546	482066
	800	4.75006	31245	84021	30684	101254	63604	57030	201306	426091	513501	482066
	801	4.756	34760	83473	34213	103406	63450	57725	201441	430456	514506	482066
	802	4.76195	30838	79277	33224	108247	62109	51616	198888	426284	524429	482066
	803	4.76789	34746	71265	29205	113338	67073	53029	207814	414632	525982	482066
	804	4.77384	32431	72400	29082	116952	68790	51642	207732	422625	516821	482066
	805	4.77978	36109	66794	31927	116843	65599	50969	200639	416693	510287	482066
	806	4.78573	32082	64530	29438	112937	68378	52533	204660	426824	512038	482066
	807	4.79167	35133	61895	28147	113149	72523	49796	205375	428887	508153	482066
	808	4.79762	33811	56278	29029	114233	68122	51728	210852	416247	508287	482066
	809	4.80356	32094	58012	28886	114760	73445	51906	208705	423972	493257	482066
	810	4.80951	34902	53707	29679	122747	69091	56200	209622	429078	507677	482066
	811	4.81545	37634	52161	28574	120452	68579	55350	217146	428587	503172	482066
	812	4.8214	34057	50129	32943	126974	71019	51508	209944	429726	514764	482066
	813	4.82734	37417	48346	28375	120032	70867	53705	212534	420370	521376	482066
	814	4.83329	35202	49571	32849	121763	62760	53938	222891	418052	519544	482066
	815	4.83923	38875	50159	32443	119075	60073	55084	223378	431511	536739	482066
	816	4.84518	38089	44055	29343	119945	61099	55596	220337	421183	532340	482066
	817	4.85112	38962	43751	30706	111351	56302	56040	220167	430318	542673	482066
	818	4.85707	38675	47865	33749	105789	59111	58122	223064	432092	553355	482066
	819	4.86301	38984	44452	34466	101166	55023	56148	223923	429779	554661	482066
	820	4.86896	35682	46675	31001	92677	51154	57684	235939	420779	551364	482066
	821	4.8749	39180	45506	34377	83502	52064	56420	226052	430773	547011	482066
	822	4.88085	35474	44719	35192	80554	49694	56641	237573	431691	539161	482066
	823	4.88679	36619	43896	29832	71598	49445	59469	235836	418557	546929	482066
	824	4.89274	39402	41767	32368	64759	52768	57883	244515	428623	540353	482066
	825	4.89868	37547	41319	32365	66318	49420	64082	240574	432042	533819	482066
	826	4.90463	37546	44412	31348	59463	51989	64556	244195	429704	532189	482066
	827	4.91057	37696	44265	27891	58389	50263	67657	257052	421131	524637	482066
	828	4.91652	33680	43623	31536	57959	50572	74567	255938	430760	521955	482066
	829	4.92246	36991	43862	29585	61596	51956	79573	262595	426805	516224	482066
	830	4.92841	37561	38863	25923	65150	54530	85798	272612	421094	507312	482066
	831	4.93435	34764	40524	24773	65529	57077	93597	273419	416794	493204	482066
	832	4.9403	33131	43797	29554	68541	60865	95320	282027	429493	503015	482066
	833	4.94624	37867	41065	29426	66004	60592	100143	286300	428999	484247	482066
	834	4.95219	38026	44942	25446	70425	67606	105307	290091	431141	490082	482066
	835	4.95813	39026	44656	26266	70553	69517	99594	293855	427146	513647	482066
	836	4.96408	35959	43810	27403	73335	78898	98737	295794	434971	534466	482066
	837	4.97002	36263	45199	26762	75309	85857	91514	295832	415195	553815	482066
	838	4.97597	34736	42541	30487	76299	92194	85564	292108	433446	609054	482066
	839	4.98191	35873	46798	26490	81952	99738	75970	296834	432449	657840	482066
	840	4.98786	34526	45374	29849	78660	109468	67571	293667	435329	754670	482066
	841	4.9938	30593	48022	26652	80064	123961	60224	299005	432958	843913	482066

## Sheet: HC 2.5 min
			The raw data obtained from 2 runs (shown in different colors) for the overall comprehensive analysis using 2.50 min H/C window
			1st run	2st run	1st run	2st run	1st run	2st run	1st run	2st run	1st run	2st run	1st run	2st run	1st run	2st run	1st run	2st run	1st run	2st run	1st run	2st run	1st run
	1tR cut	from	8.5	11	13.5	16	18.5	21	23.5	26	28.5	31	33.5	36	38.5	41	43.5	46	48.5	51	53.5	56	58.5
		to	11	13.5	16	18.5	21	23.5	26	28.5	31	33.5	36	38.5	41	43.5	46	48.5	51	53.5	56	58.5	61
		1tR min	9.75	12.25	14.75	17.25	19.75	22.25	24.75	27.25	29.75	32.25	34.75	37.25	39.75	42.25	44.75	47.25	49.75	52.25	54.75	57.25	59.75
		2tR min	Intensity
	1	0	2817	392044	11845	31035	30989	127604	93384	3475	6092	8395	62884	11620	26156	33477	123928	335965	405339	430526	472389	451794	451528
	2	0.0059453	2650	391436	11700	29840	26184	129102	105173	4846	7525	9304	94994	11246	29408	33079	124753	343472	413400	426569	481633	451800	446879
	3	0.0118903	3962	394789	13617	31774	21866	130792	111095	4200	5709	8110	128634	12333	27169	33690	122744	335731	410892	424583	494850	446099	448312
	4	0.0178353	2378	390346	12654	32453	19911	130643	108646	3683	6276	8512	163799	14050	26536	32923	127302	334316	407230	415879	501809	453741	448811
	5	0.0237803	2667	391032	12375	31883	19420	134006	97128	3827	6164	9492	185450	16317	26827	33398	130829	338556	402746	428777	504220	454406	448165
	6	0.0297253	2444	385758	12339	32525	17851	135395	87632	3821	6131	9845	176039	27069	26505	33151	128583	331131	408231	429623	515698	450707	443645
	7	0.0356703	2503	385757	12121	34781	16543	138786	77369	4151	6221	9726	161186	56387	26404	33893	127449	342063	413499	430206	509930	450948	450888
	8	0.0416153	2830	383570	10206	34758	17012	138153	72787	4156	6340	9822	130893	116939	25964	34374	131112	342590	415911	427081	512828	444070	441135
	9	0.0475603	2718	377327	10015	35138	16916	132462	72538	3526	6564	9725	94011	209609	25201	35105	132742	332689	406367	423784	510092	453983	447481
	10	0.0535053	4049	374169	9677	34530	15921	136796	71855	5322	6120	9932	64211	318216	23521	33806	126376	338709	405241	426297	505247	453868	446003
	11	0.0594503	2246	375221	7747	36743	15575	137007	78399	4860	8030	7977	39978	409897	25398	35897	124292	336957	405976	426355	494218	441841	438307		Data Transformation
	12	0.0653953	2585	374787	7224	36200	15265	131118	76415	5010	8265	8995	27036	448129	24376	35924	126635	338311	414628	424592	492404	458066	435051
	13	0.0713403	2903	366653	7417	37744	16964	134466	75482	4384	6529	8290	20439	431927	26502	34438	130288	334425	405732	416311	468018	456917	444715
	14	0.0772853	2941	349533	7176	38420	16481	129314	71141	3888	6819	7897	16421	365538	24296	35704	129622	335867	414007	427393	473755	456134	438217
	15	0.0832303	3882	301145	6794	40882	15418	128630	63892	3916	6967	7999	14538	262474	24012	34454	126347	336981	415728	428743	470271	460675	437621
	16	0.0891753	4031	217514	6388	41535	14992	128291	52498	3527	6361	8962	13969	171742	25719	34896	129463	344544	415077	432293	462605	457082	444147
	17	0.0951203	3672	124797	7486	42549	15479	128168	40791	4144	6950	8195	13867	103332	23209	34799	125256	336992	410311	424108	469435	448616	449184
	18	0.101065	4121	60553	6927	44018	15434	125596	32120	4078	5701	7971	16254	62876	24796	36025	125967	342381	420761	418929	468350	461776	447257
	19	0.10701	2498	24871	7366	43597	17214	126860	27740	5275	7666	8483	13529	40322	23636	35447	126690	343744	414646	421049	461823	451301	445748
	20	0.112955	4182	12988	7220	44661	14431	124162	21345	4291	5897	7759	13661	29141	23744	35083	122731	335843	417859	428706	467743	459847	443930
	21	0.1189	4144	10058	6998	43025	15757	129202	19946	4041	6210	8146	13337	22818	23853	34578	124959	350093	420799	424484	468075	454424	441787
	22	0.124845	2784	8848	8162	46589	14870	131291	18785	3712	6799	7613	13416	20017	23764	35069	129589	346822	414167	427974	462457	462773	446882
	23	0.13079	2470	8235	8472	45656	15042	127590	17772	3924	6272	8150	12595	17924	22906	38492	122966	350096	418568	425386	470379	464784	446557
	24	0.136735	2521	7066	7303	45974	14962	131472	17916	3987	7404	10037	12713	16882	24046	35060	126959	345330	415819	425200	461637	456761	449757
	25	0.14268	2594	5652	7564	48636	17237	133458	17857	3374	5885	8331	12275	15816	23250	36420	128119	351182	403641	428571	469394	466719	448983
	26	0.148625	2342	7202	8682	48580	15246	132434	18180	3723	7478	7570	11767	17663	25000	34072	126664	352259	418595	428949	456244	460995	443341
	27	0.15457	3864	5758	8584	48371	18258	128507	17931	3845	6125	8077	11696	16953	22514	35140	124852	350310	416964	425311	452610	469998	447875
	28	0.160515	2447	5027	7801	50055	15680	128395	17584	3989	5919	8107	12475	15150	22900	38047	129630	345420	414355	417190	458306	466316	443616
	29	0.16646	4190	4415	7276	52250	16418	125649	17915	4027	5886	8006	12353	14906	22326	35519	126475	346479	416145	430518	456570	457289	437114
	30	0.172405	4407	4184	8117	53197	17981	127846	19633	3307	5955	7830	10269	14420	22881	33831	130416	347657	416479	426545	452287	465096	446077
	31	0.17835	4405	5993	7853	53905	15962	125493	18377	3517	6109	7565	10373	14423	22483	34362	130556	347958	408248	429557	445588	453028	443631
	32	0.184295	2794	4587	7901	54606	17157	125388	19414	4705	5642	8037	9928	14121	22687	36235	132216	337983	413626	419534	447224	464679	438263
	33	0.19024	4110	4585	8131	54073	18620	127265	19156	3382	6367	9139	9243	16904	24496	36011	136371	345832	417353	431863	442703	464314	442463
	34	0.196185	2806	4496	7896	56154	18890	125250	19231	4955	6182	8228	9265	15952	23034	36412	137137	336456	417808	429367	450100	466148	447887
	35	0.20213	2634	6059	7860	59332	17965	127179	21073	3702	6160	8142	8970	22430	22578	37187	131843	342875	416186	432275	445406	464216	435315
	36	0.208075	2966	4209	8147	58903	20102	127633	17981	3474	6114	8087	10176	41649	21535	37932	134298	336647	413148	433629	445127	458412	446111
	37	0.21402	4117	5343	8274	59939	19240	124579	18419	3660	6725	7781	10296	81515	20940	37506	132629	342940	413463	428712	441504	450245	446111
	38	0.219965	2541	4112	8696	61309	21077	125436	17214	3608	8185	9296	8338	157940	22963	35791	135147	348478	419229	424700	435046	460588	446111
	39	0.22591	2835	3664	7384	63905	19656	126321	18488	3129	10525	9097	8872	246832	20467	36393	133992	339455	415868	425065	449525	456535	446111
	40	0.231855	2970	3573	6644	63265	23111	122700	15839	3601	14447	8027	10423	338412	22164	36740	132136	344100	415940	438579	450679	452413	446111
	41	0.2378	2515	5063	5542	64490	20695	128933	16828	3387	17177	7542	9362	396337	23355	39861	137244	342854	408594	434343	444505	443826	446111
	42	0.243745	4297	3836	5645	69216	21694	128135	15067	3700	21103	9714	8620	390728	27606	38580	135718	352299	405794	434808	451734	453882	446111
	43	0.24969	2496	4020	3904	70456	19483	126910	13116	3822	23780	8030	8711	334113	26135	38209	136706	354256	415688	426855	453316	454635	446111
	44	0.255635	3269	3953	5498	75184	14841	132239	12490	3463	25912	8138	8579	247328	26286	38277	136422	352597	414252	439916	448308	451526	446111
	45	0.26158	4135	3871	4115	75318	11256	129560	9442	3598	23072	7519	8914	160257	26671	37611	138782	353181	413783	441389	440031	449708	446111
	46	0.267525	2221	3358	4430	75784	7176	133781	8231	3473	21920	8150	8618	98851	26897	38300	139800	348192	406018	431961	450277	452673	446111
	47	0.27347	2437	3462	3924	80636	8467	130804	6964	3514	18870	8034	8376	60091	25571	37691	132735	347793	416985	434367	436082	459182	446111
	48	0.279415	3776	4857	4389	76885	6191	136255	7131	3631	16843	7859	8879	40738	25164	36857	139098	348824	410569	432732	442629	451458	446111
	49	0.28536	2100	3158	4026	76002	7531	137321	7705	3821	16011	7673	8891	26525	26790	39933	139769	354381	413208	443086	442781	453638	446111
	50	0.291305	2751	3845	5299	74837	5970	133450	6062	3584	13470	7503	10377	22250	24667	37993	138591	355147	402267	437372	442616	457520	446111
	51	0.29725	2572	3755	3751	72886	6179	133572	5958	3524	12078	7276	11599	21887	24499	39055	136231	344065	411520	435645	431303	447457	446111
	52	0.303195	3032	3674	4178	76331	5648	135888	5175	3610	11728	9349	14016	20941	23258	39121	144021	346896	417335	434220	426053	449260	446111
	53	0.30914	3177	3444	4214	78381	5439	136498	4869	5105	10806	9327	18396	28939	21711	42272	136937	353631	415656	420544	430263	452345	446111
	54	0.315085	2757	3366	4260	77272	5827	134499	6025	3485	10371	7446	23656	54142	22510	41737	135735	350305	405747	426517	444373	444240	446111
	55	0.32103	2702	3393	5282	80455	6090	127553	5593	3463	9684	7363	27589	100039	21812	40526	138338	352352	416101	428509	440266	443771	446111
	56	0.326975	3662	3075	4179	82179	5433	121940	5158	3997	9070	7906	34163	186668	21600	39524	142284	351872	417899	430660	441762	448281	446111
	57	0.33292	2821	3519	4434	89074	5919	112942	6054	3941	9273	7657	39344	302062	21541	40516	137569	354925	414633	426562	431858	452682	446111
	58	0.338865	2903	3550	4465	91941	4772	96011	5281	3437	8658	6945	40533	422575	21855	39674	137701	355354	421127	420504	445469	455142	446111
	59	0.34481	3079	4483	6036	92707	5400	76579	5637	3994	8792	6973	41093	510794	22500	40263	135220	352519	419004	431659	440258	457395	446111
	60	0.350755	2501	3267	5850	98926	5528	56316	5890	3504	10106	6941	41113	526279	21259	40061	135167	360053	411358	426563	443498	451017	446111
	61	0.3567	4054	3430	4495	97616	5090	41072	6471	3356	8705	7179	39122	480059	20909	42595	139680	351323	415603	430532	445370	449437	446111
	62	0.362645	4289	3513	4666	99432	7075	27406	5312	4105	9560	6925	38692	379407	19686	41052	143760	357585	410550	418735	440891	453321	446111
	63	0.36859	3925	3525	6359	99848	5582	16097	5494	3435	8265	8841	36328	257646	20086	43610	143195	353898	414529	429772	437372	444571	446111
	64	0.374535	4773	3352	4391	96745	5686	10064	5262	3506	9471	7209	34680	161222	22045	41337	142015	344663	416636	426838	440277	453666	446111
	65	0.38048	4642	3467	6211	94037	5385	8646	5052	3513	7299	8566	34057	92921	20781	40163	143251	359557	416674	418124	429299	453385	446111
	66	0.386425	5560	3752	4787	92712	5617	8986	4568	3896	6807	7350	30074	53686	20393	40991	140121	348287	416544	424246	433701	454973	446111
	67	0.39237	6421	3469	5011	87240	4996	8384	6666	3811	8249	7543	27322	37121	21430	43945	140311	356943	416208	425809	437268	455117	446111
	68	0.398315	13067	3528	6839	79609	4538	8779	5352	3797	7181	7293	26341	26271	23885	40636	140903	352176	415129	425961	432291	450103	446111
	69	0.40426	15265	2869	6181	73527	5303	7244	4933	3202	7570	7490	26191	21826	22498	38712	145754	354217	416932	428454	435079	448186	446111
	70	0.410205	17924	3364	4730	62327	5143	7802	4931	4716	6991	7172	24425	19537	22726	40427	145803	352718	408656	429149	437988	449568	446111
	71	0.41615	21792	2987	4072	55625	6290	7636	4735	3693	6856	7040	26198	18462	22852	39866	139854	356672	419111	428630	442902	446798	446111
	72	0.422095	24342	3296	4713	48206	6858	8938	5122	4939	6209	6812	25601	17802	22391	40587	145041	353288	413387	426091	441985	452282	446111
	73	0.42804	27142	3354	4146	40328	6854	7919	5148	3810	6345	7624	23059	17637	23095	40337	148323	356489	407114	425763	441457	441672	446111
	74	0.433985	27842	3236	4323	36579	6678	7902	6369	3959	6489	8505	22677	16234	22010	39300	148626	359350	415953	424412	442437	439285	446111
	75	0.43993	30041	3518	3878	28484	6011	8836	4674	4960	6046	7013	23125	15879	22041	40646	149969	354141	414050	426471	444772	449682	446111
	76	0.445875	31309	4203	3890	21597	6719	9052	5049	4714	7342	8915	22800	15714	21239	43949	146524	346617	419538	417033	433209	447845	446111
	77	0.45182	32280	3259	4040	16426	5241	7203	4856	3313	7605	7228	21842	16514	22050	43659	147209	347359	418644	430218	442817	447943	446111
	78	0.457765	32683	3299	3560	11795	5293	7865	4618	4591	6154	7045	21516	15027	21739	41162	152808	353782	410171	426546	441779	444085	446111
	79	0.46371	33944	3135	4841	7697	6957	9068	6536	4384	5960	8069	23267	14828	19522	42519	153616	354180	424879	424207	440499	455802	446111
	80	0.469655	34838	4740	3821	4995	7573	7124	6634	3471	5386	8993	21265	14612	20126	41005	151899	355534	409233	424727	432916	441585	446111
	81	0.4756	35832	3421	4567	4279	7666	7196	4669	4919	5846	7059	22586	16152	19550	41053	151341	349530	416281	425973	445407	448350	446111
	82	0.481545	36823	3034	3587	3734	5839	7511	4683	3551	5844	7682	23391	14927	19712	41630	151138	356304	428922	426873	435227	446479	446111
	83	0.48749	36528	4314	4835	3446	5316	7218	6181	3303	5003	7098	21127	13938	20476	41723	152488	358422	414448	420926	445829	440296	446111
	84	0.493435	35607	3276	5172	3118	5496	9127	5024	3390	7306	7187	22409	15183	19631	41395	157535	355581	418982	432625	446338	450483	446111
	85	0.49938	36894	3152	5380	3657	6089	7090	5631	3106	5396	7775	22618	15151	21972	41025	156511	357217	424959	432321	440894	447665	446111
	86	0.505325	36596	3002	3853	3475	5296	7417	4969	4647	5850	7245	22958	14461	19585	42942	154890	348456	433590	427777	447695	433709	446111
	87	0.51127	36544	4689	4584	4607	5403	7507	6347	3862	5958	7282	22059	14530	19545	42017	157122	349094	431991	418509	436139	443750	446111
	88	0.517215	36025	3305	3864	3394	7227	6899	5340	3869	6493	6866	21277	14502	19960	42288	153133	351041	429737	433608	441926	441235	446111
	89	0.52316	35277	4784	5189	3775	7142	7653	4672	3634	7296	7053	21690	14605	19203	40578	156116	350028	424682	432269	447576	438784	446111
	90	0.529105	35731	4485	3935	4923	5740	8277	4400	3309	7119	6426	21468	16059	19146	42570	155963	351161	423607	431684	436176	444558	446111
	91	0.53505	35206	3515	5095	3510	5609	7335	4781	3884	5361	6610	20974	13148	19907	42310	160147	360207	417767	418140	442069	448813	446111
	92	0.540995	35540	3233	3570	3661	5746	7951	6117	4976	5660	8029	19599	16219	19177	41690	153577	349282	429985	422380	430503	448478	446111
	93	0.54694	34266	3154	3722	3777	5327	6997	4824	3569	5713	8075	21333	14532	19337	42827	160951	358970	429344	432610	445216	437722	446111
	94	0.552885	34911	4621	3637	4910	5725	8930	4540	5115	5797	7955	18738	13314	18026	43467	159422	352046	429208	422530	438570	448243	446111
	95	0.55883	34311	3417	3728	3703	5371	8830	5392	3187	5711	6543	16813	13989	20030	43771	157051	357133	420641	424972	434107	433303	446111
	96	0.564775	33461	4860	3877	4000	5290	8266	7388	3441	5318	6828	16105	13603	19823	43623	158405	358519	429395	429395	444820	448419	446111
	97	0.57072	32666	3920	3681	3457	5131	7915	7589	3129	6130	6924	14621	15683	19812	43248	156950	359649	427885	429757	436274	443639	446111
	98	0.576665	32489	4688	4260	3330	6444	5940	10830	3354	5465	6264	11004	14875	18990	43876	161038	360015	428818	429125	444971	446823	446111
	99	0.58261	31930	4134	3757	3613	4978	5560	10771	3448	6238	6459	9750	15098	18426	42488	156929	359149	429910	426925	444108	445782	446111
	100	0.588555	30400	4128	4251	5330	6977	5205	12427	4964	5926	6884	10289	13025	19558	42211	163385	356431	430912	430931	443409	446939	446111
	101	0.5945	31263	5416	4648	5365	5330	6620	13923	3409	5496	7677	10027	14370	18914	43407	162203	345475	430073	427352	445286	451564	446111
	102	0.600445	30759	4159	4303	5350	4916	4909	15001	3614	5333	7106	8650	14294	18345	43896	163739	359296	424756	429008	430946	450217	446111
	103	0.60639	28816	5887	5506	3830	7179	4862	15549	3911	5839	6338	8949	13755	19429	42908	164521	359848	424828	419613	439861	447921	446111
	104	0.612335	28275	4828	5822	3928	6799	4849	17914	3549	5749	6415	8500	13415	18221	42011	159304	361126	415720	432226	440951	445296	446111
	105	0.61828	27375	5527	4475	3828	6857	4956	15807	3442	6147	6962	8399	14348	18327	44969	159101	353129	418843	428716	448939	446876	446111
	106	0.624225	26602	4955	5692	3686	5360	5388	14377	3709	7578	7048	8841	13849	18860	43848	165870	353591	414779	429793	429613	447035	446111
	107	0.63017	27151	5720	4302	3713	5517	4838	14729	4077	5926	6931	7683	14417	20384	43430	162766	363970	416785	433743	447374	446015	446111
	108	0.636115	19345	5887	4853	4393	6750	4456	14980	3791	7210	7020	8188	15200	18796	43672	167050	353616	413218	429645	443675	446261	446111
	109	0.64206	25523	5580	6114	4188	5459	4705	12670	3913	5553	6700	8277	13382	18424	45201	162557	362777	408193	433670	433462	442827	446111
	110	0.648005	24657	5379	4136	3989	4999	4846	13407	3888	7073	6737	10128	14577	19074	45221	167193	362016	416629	423309	443200	448132	446111
	111	0.65395	22917	5944	4940	5570	7259	4065	12857	3559	5744	7414	8026	13555	18894	44453	163212	359240	418978	427299	440810	442581	446111
	112	0.659895	22811	4861	6451	4204	7228	4617	13140	3788	5628	8707	8053	13232	18893	44401	162668	361939	414967	422561	436014	441175	446111
	113	0.66584	23140	4304	5120	4122	5016	5134	14715	3928	5564	7476	8513	13217	19729	44971	161037	364401	418430	418499	446285	446529	446111
	114	0.671785	20830	4644	6652	4075	5333	4800	17434	3807	8155	8438	8646	12778	21701	46493	165877	356897	420356	421897	437763	445061	446111
	115	0.67773	19677	4864	6328	4465	7031	5564	17600	3388	6642	7403	8471	12370	20730	45814	166669	357664	413982	432775	444790	437602	446111
	116	0.683675	19747	5775	5936	3897	5402	3953	18802	3890	9847	7780	8067	12635	20244	45346	169568	356095	419144	427672	446209	443791	446111
	117	0.68962	19512	4957	5513	5172	5183	4188	21169	3681	10220	7239	7936	13011	20230	45268	165544	367075	416379	421810	444104	445125	446111
	118	0.695565	19472	4791	5139	6011	5358	3962	20243	3408	11684	8280	8150	13052	19935	45501	166291	365577	414004	427233	434762	446040	446111
	119	0.70151	14182	6143	5719	5297	4678	4050	20178	3419	13312	9414	8862	12313	20163	49001	172139	356300	417971	426836	444552	450367	446111
	120	0.707455	18563	5959	5133	5526	5395	5218	20805	3428	12165	8753	9642	12356	19115	44265	166530	366768	416346	428834	446916	445689	446111
	121	0.7134	17954	4995	4755	4363	5541	3807	21139	3868	11904	7363	7584	11348	22074	44454	162838	360031	405773	431663	435009	448923	446111
	122	0.719345	17685	6436	5334	4039	5741	3968	19769	3403	12915	9355	8152	11587	22488	44983	167573	357391	418556	421595	432358	450256	446111
	123	0.72529	17242	4992	5832	6120	6782	3485	18495	3031	12398	7219	7671	11901	21556	48332	167580	364258	415163	428358	441843	445717	446111
	124	0.731235	11243	5652	4652	4453	6811	3890	19205	3406	14363	7483	7960	14591	20552	46074	170906	366848	418484	428733	436722	447203	446111
	125	0.73718	14910	5611	4582	4633	6650	5173	17801	3286	13464	7284	7798	12414	20483	45961	170967	364461	407980	431089	443299	445165	446111
	126	0.743125	14604	8988	4144	4579	5170	3681	16246	3061	13218	9990	7849	11909	20183	46532	167221	361339	417134	428192	442529	452841	446111
	127	0.74907	14444	8574	5262	4323	5143	5143	16686	3268	11579	8049	9608	12224	21933	46511	173655	363417	418726	430220	441613	450876	446111
	128	0.755015	14305	8279	4074	4759	5447	3735	16227	3591	11582	7974	7661	11809	22154	46194	173070	362638	415562	430328	435081	451209	446111
	129	0.76096	12725	9021	4067	5503	7136	3595	15350	4712	12641	8095	7933	11210	20445	49165	175971	361683	418911	426993	445444	450499	446111
	130	0.766905	13157	9064	6369	5112	5097	3687	14867	3493	11233	9799	7490	11672	21455	45123	174037	364842	409162	430329	443405	455695	446111
	131	0.77285	13116	8616	5631	5069	5521	3755	14736	3803	10155	8070	7170	12147	20919	46882	176856	361371	414753	426909	440278	444374	446111
	132	0.778795	12420	8322	7316	5100	6545	3659	13605	3502	9591	7574	8644	12306	20598	46936	184573	359806	417687	432145	444535	446745	446111
	133	0.78474	11765	8158	5033	5112	9985	3826	14959	3544	10880	7213	7488	13165	20381	47898	182349	355163	414785	427797	431530	450822	446111
	134	0.790685	11086	8619	8039	5273	17001	3760	12843	3977	10823	7846	7263	12492	20795	45486	185788	360706	414204	429503	445152	444760	446111
	135	0.79663	7846	8221	4984	4705	35181	3753	12413	4266	9130	7289	7675	12390	19418	48169	182447	360337	413272	423809	433867	449438	446111
	136	0.802575	11239	6210	8046	5586	67081	5506	12243	3577	7950	8868	7670	13027	20222	46884	179463	366388	418732	428840	433597	447878	446111
	137	0.80852	7133	9125	8055	6648	113782	3693	11580	3860	10410	7246	8008	14205	19845	48338	184598	358070	405552	430490	441968	451153	446111
	138	0.814465	9829	8858	7948	6668	164646	3678	12115	3555	10137	9082	7287	12847	20254	48663	185421	369750	407555	430811	434442	448769	446111
	139	0.82041	10462	8847	8109	9060	208826	3495	11489	3980	9275	7366	7505	12890	20181	47903	177159	365011	417006	423109	440874	444808	446111
	140	0.826355	9285	5920	5123	9219	242258	3321	10275	2972	13273	6937	7076	14140	20850	48456	178031	367709	420147	431364	433207	448801	446111
	141	0.8323	9223	6015	8073	7293	264053	4930	10907	4202	14497	7070	7266	13029	20222	49021	182021	366486	408284	422135	430622	439951	446111
	142	0.838245	9124	8483	4822	7013	258082	4766	10805	3862	16896	8605	7591	14983	20595	48697	180239	358774	414782	431432	431537	449365	446111
	143	0.84419	8737	8193	7802	7076	247413	3425	10442	5610	20092	7488	7505	13279	20576	45854	182155	360545	415710	430758	429971	442407	446111
	144	0.850135	5460	8908	8280	9777	229986	3829	10266	5017	25211	6968	8298	15535	19866	46726	180150	359703	415059	417761	432455	450375	446111
	145	0.85608	8849	6123	5821	7050	209578	3741	9583	5206	25035	6090	8392	23183	20178	51089	183334	363701	417551	429916	444223	448418	446111
	146	0.862025	8213	6260	5759	9428	197884	5310	9651	3813	27679	7047	11616	46059	20267	48654	180058	372157	416279	427433	444015	449575	446111
	147	0.86797	5911	8564	5663	6822	182207	4773	9455	3623	29869	6299	13337	97104	20987	51578	178076	362296	418313	429702	437677	449793	446111
	148	0.873915	8389	7694	5188	10733	168137	3791	9349	4133	29129	6293	14414	199253	19996	48715	176773	362702	417542	431330	443460	440148	446111
	149	0.87986	8118	7525	5468	11279	157741	6438	9235	4145	29730	8003	16318	342891	23247	49731	181674	359181	416962	431264	442241	451684	446111
	150	0.885805	5489	7324	8630	7483	142182	7132	9041	3981	32973	6481	18197	522765	19719	49625	181806	361675	418782	429271	442850	451691	446111
	151	0.89175	7753	4376	5277	7578	129828	4074	8754	3591	33583	6306	17611	710504	17872	50715	185398	363725	411032	431817	435025	451178	446111
	152	0.897695	4551	4182	5700	8205	118987	4244	8956	3854	33009	6209	18555	894794	18902	50052	180329	369740	418237	425145	446331	452319	446111
	153	0.90364	7811	7336	5381	10809	111736	6746	8885	3854	35033	6405	17148	1061524	19161	47241	188230	367857	421782	430419	446022	448781	446111
	154	0.909585	9326	6899	5414	11546	104297	7300	8654	3929	36902	6795	15370	1151141	19699	46703	187017	371717	419798	420946	441397	439955	446111
	155	0.91553	10068	6592	5494	8909	98364	4367	8985	3802	36077	6653	13388	1190764	20279	49520	190661	364048	420621	427460	436832	448058	446111
	156	0.921475	6942	6520	5448	7942	87763	4451	9742	5154	36624	6561	12429	1131567	19747	52367	187731	374115	406822	421510	441905	447465	446111
	157	0.92742	6802	4305	8068	9476	84401	4496	8510	3645	37383	5735	11645	967088	20231	49908	191327	373635	413127	428480	446100	450008	446111
	158	0.933365	9209	6152	8078	12426	74164	4636	8778	3698	38359	5849	11424	727999	23290	49226	189219	366757	418178	428839	445887	451789	446111
	159	0.93931	6621	6628	5640	9146	72734	4731	8873	3730	38606	8005	12815	472932	22766	50645	190950	375335	419914	430043	441526	437260	446111
	160	0.945255	9534	6514	5697	11429	69507	4120	11248	5508	40060	7944	11358	260895	20505	50753	196145	374743	421477	419775	443842	444114	446111
	161	0.9512	6621	7480	5212	12392	61322	7128	8227	6522	40429	6256	12962	131668	20844	54130	191882	375341	423523	429227	442381	450198	446111
	162	0.957145	9274	4336	8467	12654	53722	4216	7940	7976	41116	7145	10981	67861	22266	51985	196812	366137	417331	423243	444002	452537	446111
	163	0.96309	9958	4182	5067	10326	49925	3840	8422	7689	44209	6508	11870	41044	20964	55084	198317	366639	420326	429526	442764	435575	446111
	164	0.969035	9930	3923	7954	10302	49303	4424	10909	4510	43710	6349	11134	29918	20374	50130	194117	378432	419319	432154	437248	452235	446111
	165	0.97498	6558	6689	5555	9462	42224	4636	10459	4703	41765	6796	11321	26693	20832	51816	191040	374937	422963	433185	442385	448485	446111
	166	0.980925	6290	3805	5537	9791	41460	4031	7408	4622	38707	8311	12175	21754	23623	52099	190243	377562	406486	432879	445402	436604	446111
	167	0.98687	6916	3855	4989	7836	39726	4381	10694	7901	31779	6760	11018	19891	21209	52260	192887	376140	410591	419354	443371	436551	446111
	168	0.992815	9448	4499	7988	6297	35900	4461	8062	4779	25831	6800	11524	19579	19908	53859	197711	376885	408882	432897	442677	438056	446111
	169	0.99876	6900	6555	8723	5206	32256	4478	10705	4646	21307	6914	11294	17157	22027	50978	193584	377497	424789	427474	444386	440210	446111
	170	1.00471	9798	6420	5492	4484	29205	4114	7783	5112	21952	6781	10867	17964	21876	54751	192993	369292	418195	431994	443517	445319	446111
	171	1.01065	10251	3456	5769	3937	27384	4188	10036	12557	21791	6752	10673	16317	24983	54489	198757	375446	411900	422875	444203	443206	446111
	172	1.0166	10201	3598	8938	4048	27551	4492	10691	13032	18021	6937	10901	15258	20236	52649	199597	375341	412388	431184	441031	448482	446111
	173	1.02254	9916	3909	8441	3713	24760	7011	10816	14273	20965	7045	13088	15532	20916	51198	201149	379674	420465	434815	435481	441713	446111
	174	1.02849	7260	4331	7674	4006	24679	4271	9983	12998	17841	10034	12766	15045	21047	50673	200965	373523	410629	421569	442517	444028	446111
	175	1.03443	10450	4221	8608	3865	21188	4274	7424	11932	17532	6820	10616	17668	20399	53930	198633	369128	415747	423364	439117	436480	446111
	176	1.04038	9994	3805	5772	3429	22361	4146	10319	9676	17416	10316	11197	14718	20878	54346	205736	375006	419264	431883	442104	444864	446111
	177	1.04632	6169	4130	8125	4098	22296	4426	10249	11924	17593	6862	10466	14783	21022	55483	200134	376691	419958	420903	434571	448592	446111
	178	1.05227	8890	7087	8310	3682	16813	7006	6994	8331	20517	7163	10560	15571	22626	52236	209201	372157	416291	432775	444380	451135	446111
	179	1.05821	9943	4288	8338	3546	16482	4407	7732	9093	16250	6611	10970	14059	21255	53978	203634	374706	422817	425526	433747	449267	446111
	180	1.06416	10668	7131	8326	6060	15384	4341	7621	25136	19566	6517	11538	14707	20225	57565	204788	368012	420971	432359	434146	447072	446111
	181	1.0701	7833	3552	8699	3583	14129	4222	10110	34521	15970	6586	11069	13882	22555	52087	203303	370279	419343	423762	444348	444250	446111
	182	1.07605	7465	6780	8081	3744	14126	4623	7515	37286	20488	6683	10783	14389	20186	52371	212319	373558	419635	422850	444190	450154	446111
	183	1.08199	10679	3882	5994	6369	13742	4255	7070	27347	16744	6028	11224	14632	20969	53116	206692	376664	413762	430193	441113	444934	446111
	184	1.08794	10507	4025	5783	6588	12959	7291	7689	23467	16589	9807	10526	14369	22218	55729	210131	374679	419946	432463	443797	438013	446111
	185	1.09388	9984	3752	8191	3939	14708	4486	7545	21849	16955	9401	13966	16535	21650	56274	213011	376782	419747	424177	442457	448321	446111
	186	1.09983	7055	6155	5092	4028	15515	4500	7721	14837	16898	9326	9683	21422	22287	57682	212369	375088	419721	421456	445060	446838	446111
	187	1.10577	9943	7050	7952	6692	11714	4484	7550	13159	16027	6773	13117	34269	22928	55076	213519	371368	421257	428366	446435	447009	446111
	188	1.11172	6757	7100	5386	3833	11956	4270	7056	13581	15697	6884	9945	60932	23174	58094	212261	376677	422559	421212	451445	442743	446111
	189	1.11766	9556	6636	7958	6486	11455	4415	6788	12732	15818	7040	13464	117061	22793	52717	214228	376587	421144	422264	448478	446209	446111
	190	1.12361	8850	3796	5504	6482	11342	4133	7049	9405	15665	6275	10239	199858	23346	55856	221056	369496	417311	428517	444134	448234	446111
	191	1.12955	8859	6777	7864	6705	11743	4732	9419	9485	16934	9611	12819	325804	21057	56989	215454	375974	422620	423760	448351	449062	446111
	192	1.1355	9035	7275	5535	3438	13845	4516	9991	9818	18257	6820	10752	461431	22137	55212	217268	369802	421467	429285	450338	445450	446111
	193	1.14144	8310	6727	7725	5853	11078	4633	10355	16092	22448	13008	10215	569285	21321	55912	216646	365073	422792	425058	448542	442734	446111
	194	1.14739	8819	6381	8598	6213	13857	4294	6976	21371	22514	10385	10989	603983	21313	55377	217414	366637	414432	428377	442651	439042	446111
	195	1.15333	5845	3677	5551	6196	10694	7386	7846	17086	18194	10844	13449	521630	24185	57430	225634	366206	426126	427798	450870	436114	446111
	196	1.15928	6137	7190	8415	3255	11481	4226	9655	17129	22233	13036	14143	388826	22307	58281	222069	371864	418409	429272	449553	435416	446111
	197	1.16522	9056	3937	8329	3473	14245	4209	11025	16102	18401	13141	16776	237383	21115	57835	226065	375680	414633	429911	447273	451369	446111
	198	1.17117	5601	6566	8208	3932	13315	4121	11316	15763	18682	13191	13467	130670	23745	53845	219922	374019	422881	429817	448789	445836	446111
	199	1.17711	6512	6934	7862	3837	10416	7062	10334	15228	18023	11256	13598	68347	21348	53250	221494	368726	420075	435903	450936	442435	446111
	200	1.18306	11713	4229	5289	6576	10465	6762	12875	15269	20323	10246	14120	42875	23825	56204	222754	369668	420566	430815	447666	447507	446111
	201	1.189	9553	6593	5543	6374	10293	4204	11159	17537	17254	10423	15378	26812	23538	54705	223539	381321	420802	428851	449802	449498	446111
	202	1.19495	13608	6659	8204	6530	9882	7643	10386	15985	17856	10636	19576	22213	23221	57400	225821	368329	421444	433395	442197	446942	446111
	203	1.20089	12148	6570	8139	6373	10596	6668	11274	19341	17975	14002	22866	20285	23469	53937	224754	378538	422754	433196	434727	438464	446111
	204	1.20684	12379	4097	8829	3648	13518	10395	11590	15631	17955	13700	22828	18437	22580	55240	223868	383362	421881	430626	433055	444381	446111
	205	1.21278	12106	3774	5772	6925	10016	7465	10544	16030	20995	11443	27251	18684	23039	54407	225413	383299	424162	425883	438333	444312	446111
	206	1.21873	13156	6656	8205	6398	10039	8045	10923	18431	23383	13308	24108	19694	24769	58284	224557	380761	424894	433964	445701	446675	446111
	207	1.22467	13424	3503	7884	6752	12793	7988	13119	17975	20477	10850	26635	19437	26257	59603	221416	379693	423401	433636	439676	450166	446111
	208	1.23062	10317	6412	5337	6689	10267	10171	12026	15585	20671	10565	26306	18187	27245	58447	220552	381833	414428	432331	444138	440699	446111
	209	1.23656	10880	6319	5583	3495	12862	10436	11194	15901	21100	10396	25829	20193	27009	57782	222087	379760	415877	433689	447983	435017	446111
	210	1.24251	14369	4296	8819	3683	10074	10401	10680	14367	21332	10720	25904	19191	30258	59779	224215	374792	420226	428621	445253	444992	446111
	211	1.24845	13696	6541	5987	6999	10226	7949	10884	15129	20957	10617	26254	21393	24872	58681	225766	384175	420114	431514	442688	446553	446111
	212	1.2544	13481	6345	5384	6764	9871	10296	13430	15377	24300	10607	27037	18771	24991	56733	225408	379445	420666	433277	442530	436422	446111
	213	1.26034	10487	6662	8659	6392	9539	8627	10024	17071	19994	10911	26590	19395	25106	60327	232743	380584	420744	432168	443933	444128	446111
	214	1.26629	10543	6274	5843	3479	12349	10557	9930	15277	20075	11344	26581	21900	26531	58342	228366	374129	418787	430689	438990	443052	446111
	215	1.27223	12767	6801	6172	6604	11077	10693	13721	15251	19258	10578	26344	18577	28050	55984	236403	371372	421261	431008	439909	443487	446111
	216	1.27818	13346	6615	8415	3806	11550	7912	10512	18582	22499	10875	26841	22150	27589	62653	230755	370909	411834	420840	448279	447295	446111
	217	1.28412	9884	6434	8912	6581	12268	9319	13089	14869	20159	11161	26864	18455	28855	58697	237093	377069	419349	432683	446297	445960	446111
	218	1.29007	13207	7199	6740	4164	12047	13448	12643	19162	20130	10719	27149	18853	29215	60476	237225	368565	420743	421968	442967	447952	446111
	219	1.29601	9541	3901	8389	4003	12146	14727	12720	15773	19525	11898	26337	19525	29275	65010	236766	381140	419664	422018	446702	439962	446111
	220	1.30196	12314	4023	7281	3853	15066	14730	9142	18943	23574	14149	26356	21791	29872	60002	239109	380088	420485	428771	432299	450275	446111
	221	1.3079	12348	6792	12462	6460	12390	15786	10039	18444	20230	11239	28778	18718	29210	60760	231425	371622	424949	427646	440537	441869	446111
	222	1.31385	11609	6806	17014	7696	12555	17739	12560	17423	23873	11112	28550	18962	29596	61201	236053	379778	427614	431512	444571	441733	446111
	223	1.31979	8563	6441	21057	5088	15199	18328	9454	14872	23883	11313	24794	19219	29637	65721	229204	373553	415619	419516	442863	446283	446111
	224	1.32574	11361	3669	36050	5592	14866	18717	9561	14527	20813	11391	26238	22337	36492	68671	232908	378303	423171	430736	445281	445925	446111
	225	1.33168	11287	6768	46047	9030	12287	17725	9921	15360	24426	12186	26463	18082	39161	65603	229279	378536	426633	434585	442642	445472	446111
	226	1.33763	8416	6486	63248	6271	12360	19643	10587	15277	24923	11510	28056	18811	38880	65611	238584	384727	426466	429579	440886	449691	446111
	227	1.34357	8742	3980	74087	5901	12604	18776	9801	14793	21212	11379	25393	22008	35401	65345	237542	377140	430677	426087	445927	440257	446111
	228	1.34952	11839	4387	84572	5909	12321	20014	9589	14625	22193	14639	25667	19197	34564	65346	232507	374570	429224	445888	442298	442907	446111
	229	1.35546	8402	4185	90475	5707	12844	23650	9944	14629	22070	11286	28472	19777	31554	65553	242513	382966	422245	441939	441254	444654	446111
	230	1.36141	11013	6655	94423	7602	15301	21797	12795	14176	24496	11573	25920	18973	35034	66150	232289	369403	427684	447702	444785	444996	446111
	231	1.36735	7909	3880	95661	6623	11730	24115	9927	17501	21809	11910	29589	18810	30883	65954	244489	386343	434760	435069	437278	437058	446111
	232	1.3733	10975	4045	96028	4238	16000	29015	13031	15121	22417	11889	29587	22506	30928	69621	249955	392385	431589	449652	446234	446413	446111
	233	1.37924	7991	3656	90276	3853	16242	32023	11220	14096	22795	12762	28738	18504	31179	71735	240966	384364	434473	445592	435081	442358	446111
	234	1.38519	10886	3956	93680	3763	14469	31916	13850	13902	22291	15386	28370	18863	35477	67165	254784	393125	424855	447435	442830	447834	446111
	235	1.39113	11089	3663	94266	3802	17303	31280	10646	15380	24710	13083	27388	18949	31553	71106	249362	394594	436392	443777	448035	435670	446111
	236	1.39708	8153	4137	93784	4184	18013	33360	12930	14723	20451	12531	28110	18582	30311	68995	256372	395850	429653	448683	433806	448863	446111
	237	1.40302	10280	4130	92240	7370	22001	31129	12886	14423	21090	13012	28136	21697	30406	66541	252049	381763	422180	447624	444564	446128	446111
	238	1.40897	7586	7076	92010	4341	23927	28534	13539	16945	19621	12585	30159	17332	29934	66152	248938	393550	419414	451531	436730	446238	446111
	239	1.41491	10486	6532	92972	4402	22881	28344	13502	14207	22460	12935	29800	19540	29710	66826	258682	391514	432554	448832	438760	433679	446111
	240	1.42086	11046	6953	90444	6640	19511	29266	13882	17427	17397	13315	31426	17024	34312	66054	251152	392434	434102	449761	442450	448333	446111
	241	1.4268	11014	3934	92453	6867	17758	27848	11060	14474	17978	15990	34614	17524	33287	72501	251204	395023	429130	449817	446257	440899	446111
	242	1.43275	8019	6804	92981	7518	16371	23363	10909	13403	15473	12293	37058	17220	31989	68806	259616	394369	430310	448590	446559	449629	446111
	243	1.43869	10605	6655	92440	4688	18027	23915	10078	14367	19718	12642	41099	17756	30778	69672	247677	396177	421907	448432	440837	440338	446111
	244	1.44464	11013	6448	90886	4563	14702	22041	13094	13668	16442	12186	46986	18788	32345	68137	253722	392357	432717	447509	443075	444960	446111
	245	1.45058	10473	6351	91035	7108	17178	21317	10705	17530	19703	12180	47350	17569	30392	72529	261365	397407	425665	434526	441834	448516	446111
	246	1.45653	10852	3965	89026	4818	16981	21093	11593	14495	16318	12280	52306	17517	31107	76617	251694	395154	432128	444685	433756	441574	446111
	247	1.46247	7234	3875	92070	4996	13586	20189	11518	14180	16224	12473	51990	17574	35686	73915	262424	393470	433774	446756	435206	446540	446111
	248	1.46842	11022	6442	90503	7819	13268	20058	11182	17177	16318	12234	51964	21711	31721	72232	263037	390551	433047	445708	435234	444351	446111
	249	1.47436	10599	6184	92551	6797	12768	19776	13920	14168	16200	12516	45407	18492	30979	75627	255622	390187	435883	449065	442047	445619	446111
	250	1.48031	10398	3504	97023	4516	12836	20082	11440	14547	15788	15700	41592	18217	29194	68931	263807	382108	434323	434215	442167	444698	446111
	251	1.48625	10185	6497	99272	7271	13190	18891	11513	13844	16356	12418	36062	22340	30041	69469	260167	387960	431778	437272	444886	443650	446111
	252	1.4922	10276	4114	105010	4898	12227	18443	10598	13990	15154	11677	32189	21975	30514	70074	257815	382300	430774	434907	440999	446418	446111
	253	1.49814	7183	4057	109727	4639	12783	19735	11366	14236	19595	12858	29607	22340	30258	70117	269631	389609	434172	448358	445043	443019	446111
	254	1.50409	10932	4052	115814	4625	12500	18702	10410	14329	16351	12373	27109	20629	30263	70032	262836	383871	431995	452930	444576	443302	446111
	255	1.51003	10258	4022	118326	6996	12739	17828	12828	14339	15285	12091	28271	20564	30542	70060	261061	393503	424419	438078	441195	445728	446111
	256	1.51598	10269	3687	121984	7761	13323	21385	13133	17223	15933	12508	29756	21724	34896	69842	271642	391026	438155	438973	432072	436960	446111
	257	1.52192	7862	7359	123652	5334	16206	18816	10401	14025	16913	15165	27123	22213	31074	70643	263699	386949	434761	451834	443501	446743	446111
	258	1.52787	7719	7612	126748	7790	13566	18010	10794	16632	17047	11403	30444	22278	31698	72439	271564	383968	439140	445391	443192	438703	446111
	259	1.53381	6883	7668	132509	4558	13126	17760	13280	14151	17203	11442	29796	22820	30315	70416	276305	399101	434259	449608	433802	442555	446111
	260	1.53976	10168	8420	141773	4819	13423	17565	13893	14021	21311	11897	27031	21152	31677	71951	268409	398579	437359	448113	441404	444924	446111
	261	1.5457	7183	8755	143393	7721	17281	21192	11162	13208	18621	12193	26868	21370	31095	76135	266776	401230	436427	433852	440211	444963	446111
	262	1.55165	7235	5548	149163	7648	13894	17450	13643	13503	18957	11468	27885	23208	30845	70818	275694	401792	435260	445493	443839	441046	446111
	263	1.55759	6917	5899	152013	4969	13956	22038	11227	14892	19769	11839	27188	37635	32080	73305	277307	400072	435053	435837	443080	439172	446111
	264	1.56354	10020	8891	149690	4988	16643	18796	11483	14336	20133	10925	26538	69707	32128	74294	269096	405272	428330	442647	444128	442182	446111
	265	1.56948	10323	5635	144901	4893	14105	20864	10696	16436	19268	14423	27292	160904	32806	74428	268486	392052	436397	448433	431717	446160	446111
	266	1.57543	6981	5706	136841	4815	14701	17964	11956	19427	19010	11367	26956	334971	34950	77190	271745	403916	434963	436710	439639	445331	446111
	267	1.58137	6782	9261	123975	4650	14785	20657	12322	17491	17821	11330	27356	591326	35511	74643	272833	393399	434789	447554	444714	446602	446111
	268	1.58732	10012	5654	110778	4515	14304	18178	12073	18340	17598	11208	26611	950760	32193	74924	274121	408957	436470	438429	442120	440076	446111
	269	1.59326	10130	5898	95162	4904	15467	18226	14620	17826	17700	13596	27998	1260651	31650	78648	283783	399118	440426	448623	442994	455208	446111
	270	1.59921	7359	5582	77923	4744	15192	20768	13176	18035	17785	11053	30194	1463531	35596	78772	277833	402943	437365	438714	445756	443193	446111
	271	1.60515	7206	6096	65106	4941	19065	17626	15046	21527	17542	11440	35529	1348968	32717	73267	285508	396898	442188	445463	439051	437276	446111
	272	1.6111	6994	8908	54200	5284	17997	18080	15191	21606	21170	11049	42952	932267	35142	74178	285859	388351	431217	449386	444509	436418	446111
	273	1.61704	9879	8975	46150	4856	14923	17580	13325	19364	17297	14199	53362	447839	31935	73888	289388	390732	435795	440334	435400	445726	446111
	274	1.62299	10624	8645	37060	5152	18858	17377	13699	20001	17220	10962	59714	150810	31744	75044	280732	403070	430953	437170	432989	445922	446111
	275	1.62893	10194	5736	30646	4742	16131	17758	14620	23667	17710	12068	61933	55986	33348	74389	290785	389242	439640	440367	436332	442181	446111
	276	1.63488	10046	8691	23696	7062	15481	17525	14268	21658	21480	11502	59144	35775	32557	74850	287072	393026	427835	438652	432838	434590	446111
	277	1.64082	9942	5436	20730	4582	18969	17228	14449	20671	20253	11319	58297	25087	31383	81467	280449	399786	440019	451377	432038	449746	446111
	278	1.64677	9382	8558	18722	7036	19831	17503	14835	23647	21042	11147	67294	22180	31323	74819	286455	397931	437104	451405	444978	449429	446111
	279	1.65271	10294	8574	15772	7426	15331	16975	16097	24339	23604	12327	92749	21113	35358	73367	284103	396256	443471	452912	445989	447136	446111
	280	1.65866	9752	5672	14614	6904	14595	17432	17904	25590	19375	15083	139674	20858	38023	74965	293645	388012	439476	453036	434172	444452	446111
	281	1.6646	7047	8141	16492	5041	15274	17460	14875	27689	19652	11629	197426	20459	34378	74295	287500	392409	423942	447982	441879	451437	446111
	282	1.67055	6835	5295	12332	4602	15428	17453	14872	29435	20176	12489	231502	18566	34936	76994	288601	401092	430007	439129	442825	441410	446111
	283	1.67649	10333	8388	12571	4742	15727	19020	17540	32049	20831	11407	245590	18975	35751	80379	298806	402394	439076	436797	444651	435246	446111
	284	1.68244	6725	9229	11522	4865	19571	17005	15506	32871	24633	15632	214187	18886	37157	76982	297075	390755	435408	439249	433775	440327	446111
	285	1.68838	9149	8312	10961	4634	19210	19918	16903	34537	20570	12318	165207	18377	36255	74825	289713	400758	427707	448652	442615	438851	446111
	286	1.69433	6484	5428	10859	5014	19620	19562	17718	36393	21441	15528	113571	18894	35294	80634	293009	392507	427588	454372	444884	447538	446111
	287	1.70027	6657	8994	11050	5017	17860	20268	15495	42531	20711	15752	76438	19216	40155	76341	300407	401937	440373	450099	444703	444542	446111
	288	1.70622	9828	8769	13450	7726	21940	16751	15301	43185	21255	11997	54752	21844	38070	78102	301008	402212	442952	447852	440657	448068	446111
	289	1.71216	11123	8700	10946	5077	30832	19762	16312	46452	21560	12547	42157	18125	34256	82021	294616	394237	436045	452628	439595	437148	446111
	290	1.71811	8784	4832	10230	4939	42156	19816	15902	50852	20883	11439	35691	18390	36313	78274	298289	404647	429229	454109	446641	436934	446111
	291	1.72405	14097	8720	10471	4845	73827	16243	17159	55676	20008	12378	37151	17124	40808	77119	302899	402538	434792	453051	445231	441447	446111
	292	1.73	10553	5206	10509	4849	127353	20316	28697	60725	21003	11608	32165	17443	38435	78494	304251	403269	426382	449105	444842	445497	446111
	293	1.73594	14227	8144	13021	7876	212996	21497	69846	67197	20542	11385	30878	17956	37950	78238	297806	389883	441791	453473	443028	449079	446111
	294	1.74189	14020	5125	13652	5602	339073	24361	100846	69840	19672	12045	34973	21018	43927	80506	306885	404648	440296	446499	446759	437162	446111
	295	1.74783	14106	8847	10845	9111	514849	28380	106520	75559	19185	11936	31486	16486	38322	78051	309256	391669	424960	450081	444461	446166	446111
	296	1.75378	14273	8441	14073	9233	719742	29665	102284	83372	21962	12064	29257	17497	38085	78427	307137	391511	436622	452223	442948	448863	446111
	297	1.75972	13116	8704	9726	9201	948006	29322	100500	90873	19898	11894	32472	17560	36396	78386	307748	396658	429810	449146	443101	442642	446111
	298	1.76567	12997	5409	13934	6348	1148470	31277	95369	93532	19218	15614	31700	17223	35431	81572	305730	407012	429579	441233	437320	434360	446111
	299	1.77161	13854	8385	10818	6688	1312610	35905	88895	99882	20371	12276	30615	17772	35315	86448	310285	401742	438640	452069	443132	442532	446111
	300	1.77756	8685	7899	15120	6548	1409927	37729	84030	107674	18902	12769	34399	16730	35505	80472	303780	399329	425471	451785	441552	435243	446111
	301	1.7835	12147	5181	13951	6325	1446288	38606	79030	114078	22551	16552	32388	17608	36268	86757	309920	392363	439914	437159	445591	445556	446111
	302	1.78945	8778	8401	13891	6258	1398529	36562	66952	122198	21839	13324	36584	17223	35397	85374	300748	403153	436963	449033	444814	442093	446111
	303	1.79539	11907	8521	14808	6667	1286914	37698	60752	132453	23412	14668	32753	17189	34978	84671	314606	408846	430241	450482	441504	443845	446111
	304	1.80134	12517	5112	10916	6988	1142722	38039	52497	140004	20307	13949	32735	18102	34971	81869	302420	395023	439698	453585	449461	433871	446111
	305	1.80728	8793	7951	14633	9088	999940	42182	46481	145201	20026	18259	31990	16570	36080	87664	310773	396961	438553	450200	443790	432077	446111
	306	1.81323	12567	4669	10271	9504	906579	44108	36026	152592	21049	15634	32611	20968	35338	85550	312181	403013	432680	455262	438676	441907	446111
	307	1.81917	12277	8272	15304	6621	836340	46581	30231	159962	19711	20025	34446	21355	36150	83424	307350	397770	438426	454697	435434	445376	446111
	308	1.82512	12264	5289	14862	9517	821049	43030	24950	162113	20371	20715	31350	20557	35246	83857	309940	404924	440986	440876	438444	445687	446111
	309	1.83106	12369	5224	10603	9604	797899	43432	20626	167608	21541	18456	29929	18516	35335	84746	320403	396191	430457	453965	438132	442904	446111
	310	1.83701	12314	7962	11059	6656	784017	45065	18536	171198	23956	20096	28210	17457	35957	84832	317538	406703	442589	453816	440091	443778	446111
	311	1.84295	11674	8225	10413	9840	742393	45413	20752	172359	21244	22728	29508	16905	36494	83809	316419	395908	439171	452027	439902	444138	446111
	312	1.8489	8095	7546	10165	6503	692926	42426	17133	161061	21887	28735	32853	18237	36701	85030	317901	403415	433583	443232	443739	436318	446111
	313	1.85484	11955	5071	9924	9624	645961	41123	16836	163909	21971	29241	31157	17167	41613	88390	310876	396545	445208	451419	442088	443138	446111
	314	1.86079	12607	5100	15685	9048	582827	43200	16312	158502	22148	32164	30389	17878	40701	82811	313055	400255	444139	447357	443265	444837	446111
	315	1.86673	11841	5193	21279	6327	517340	42342	16419	152551	25985	40172	30803	19091	35665	84811	308210	399368	431822	447247	444412	445504	446111
	316	1.87268	8823	8315	33107	6099	436319	42927	16687	141030	22599	42359	35797	19208	35975	83656	320234	395587	441084	456246	432039	446278	446111
	317	1.87862	11846	7473	43464	9555	364883	39309	16650	129746	23989	53022	34295	19444	39558	82906	313047	404822	438231	454272	437772	446259	446111
	318	1.88457	8894	8023	57494	9117	300689	41192	20753	113673	27228	60924	40402	22220	39866	82927	316037	402873	440670	440452	442430	444550	446111
	319	1.89051	11391	4710	61698	6066	247148	37927	19126	101083	23861	72756	40437	19725	35390	84284	311114	396827	442217	456424	442942	445131	446111
	320	1.89646	12220	5137	63738	9185	205845	36534	20400	89612	24449	86761	46271	20986	39545	82780	308954	394867	444595	447729	443007	444447	446111
	321	1.9024	12245	8069	67896	6678	185099	36254	19788	74117	25073	106022	47812	20826	40013	85213	308562	396975	428674	453404	443149	444899	446111
	322	1.90835	13373	8295	68185	6065	160842	34653	20100	67479	28348	129162	51629	20989	36272	83865	309957	409289	440692	451483	443122	438780	446111
	323	1.91429	15527	7810	69317	7019	154604	37169	20006	53489	25317	156931	61658	24092	36318	83757	315555	399224	441979	448680	436417	445266	446111
	324	1.92024	15077	7664	69208	9240	146451	31570	19535	45296	29550	187605	67868	20994	35820	91393	312012	409067	432542	452726	441446	449642	446111
	325	1.92618	19823	5096	73030	7030	148866	33001	19946	37376	26125	227653	73381	20872	37378	84262	319165	394618	430644	451310	442885	445314	446111
	326	1.93213	19043	8991	75283	9710	146475	31489	18962	32304	27514	275581	80484	23424	36027	92320	319263	409568	443498	444602	441036	447906	446111
	327	1.93807	17818	8171	84227	7125	137266	25956	19152	27499	26057	331408	91673	24438	34991	85506	318884	400067	442746	456290	446095	444970	446111
	328	1.94402	18009	8514	89331	7504	136938	27999	18174	25560	30845	393311	103247	23476	40087	92656	314038	407199	445265	457699	442624	435693	446111
	329	1.94996	17254	5678	92460	9903	140217	25525	20481	20025	27737	461147	121613	20684	35889	88292	314688	399100	442920	441207	443400	441673	446111
	330	1.95591	15812	8650	97395	7353	136509	25093	20585	18035	32834	519393	138171	19394	36350	94670	322198	408159	444064	456002	444057	440325	446111
	331	1.96185	15221	5855	99869	9517	134209	24113	16643	18632	29128	589401	162392	20697	36237	89564	317825	397084	440261	438389	445194	449270	446111
	332	1.9678	13501	8475	102768	9311	134216	20159	17263	15146	34335	671519	185955	19440	42073	92174	323498	408262	443316	461910	438843	446296	446111
	333	1.97374	9812	8552	107953	7564	129430	19888	18120	13311	30593	746784	215140	21830	43141	89232	323033	397109	429788	454302	439832	447710	446111
	334	1.97969	12392	5718	105582	7088	129231	24020	16700	13462	31812	816314	239217	18452	38418	87696	328081	409637	443321	453005	443013	437692	446111
	335	1.98563	8829	8818	112325	9536	123856	21335	17095	16438	33163	866633	270830	22522	38027	90284	324632	399328	445434	450448	442123	448035	446111
	336	1.99158	11497	5318	126016	7370	126084	23088	20114	13596	33862	920427	302223	20486	37001	95866	327671	407431	429510	450274	440162	435590	446111
	337	1.99752	11904	5967	131259	7764	130761	21070	17970	16167	33427	949174	342226	18984	41236	97525	327450	398032	444480	451966	445005	435300	446111
	338	2.00347	8162	8445	132856	7112	127969	21690	17584	16263	35286	960133	372421	18466	36062	96885	328373	403818	432837	454133	443354	447417	446111
	339	2.00941	11823	5573	148925	7723	127660	21521	18496	13150	40359	921752	411596	17644	36607	92754	317381	410465	436829	458030	440022	452052	446111
	340	2.01536	12121	8856	159154	7938	128173	22160	16956	12894	37765	832257	451543	18161	35121	92948	325990	406690	444683	449295	440302	443967	446111
	341	2.0213	12365	5883	165481	10085	132566	21458	19066	15701	42624	722429	497778	17604	39234	93945	318444	408055	445179	462104	430597	445113	446111
	342	2.02725	10911	8859	176674	10000	135427	21545	19337	13682	42201	585250	531327	18219	35986	91576	325993	409051	436053	439787	444979	448417	446111
	343	2.03319	11053	8730	180901	7152	140352	21659	20041	13472	42402	444742	571145	19111	35798	97144	330017	395663	444853	439824	446233	447395	446111
	344	2.03914	11599	5681	190726	7224	144224	21752	22576	13137	43650	315275	604176	18291	39766	97973	329016	398522	444112	453320	439044	450795	446111
	345	2.04508	7774	7883	203103	6541	142879	20973	19812	13470	44310	211992	627932	18460	35334	93624	324427	409071	435397	454593	440917	451000	446111
	346	2.05103	7621	8474	204508	7523	149511	22219	20286	16237	45310	140942	631222	18915	34597	99854	320608	413346	433957	453189	442177	447012	446111
	347	2.05697	8155	5662	221299	6970	151574	21973	20287	17591	46497	92547	616462	18465	36862	92860	318688	407532	447396	457604	434202	448884	446111
	348	2.06292	10164	6365	239933	7535	154719	22762	23563	17778	45221	56737	583683	18601	39213	94213	329429	408951	431586	445326	445457	449485	446111
	349	2.06886	10516	8553	253822	7348	153637	22707	20708	17997	45570	38907	518085	19965	36224	90468	329980	398246	446340	453331	438023	445184	446111
	350	2.07481	10683	8807	263015	7896	161638	24908	23682	14969	44076	30811	442114	25626	39869	93606	322106	412203	447008	439910	432641	450243	446111
	351	2.08075	6873	5862	260375	7508	162773	26312	20757	16305	46893	25580	365922	30360	36799	92569	332650	398523	444364	455598	443324	448955	446111
	352	2.0867	10774	5492	281429	11036	165287	26543	23889	16060	46136	21330	289736	28007	36141	92282	328147	398155	448548	445352	441644	443966	446111
	353	2.09264	9775	8877	289872	7704	167097	23795	24092	17312	43074	18444	215861	24037	37612	91685	332829	400562	432782	444454	433305	445503	446111
	354	2.09859	10022	5531	285122	10567	174643	24907	24053	20935	45357	20199	152756	21538	38858	93719	333884	409598	446255	456129	433211	449914	446111
	355	2.10453	9949	8637	299208	7765	177229	25865	23579	18217	43235	17216	108805	20064	38191	97231	326383	408539	437028	444918	441514	452672	446111
	356	2.11048	7121	9065	301266	11018	180203	28168	21528	22889	43540	16499	72777	19755	39963	95688	326602	403210	446522	456657	433009	437119	446111
	357	2.11642	9917	8477	305160	8564	184434	29687	21130	24920	47347	17163	48415	22114	38986	94624	328822	405929	447076	453209	444429	450511	446111
	358	2.12237	6796	9182	304848	10022	186640	27840	21411	22330	45675	20166	35901	18523	40560	94870	328448	400669	434758	457428	445678	437460	446111
	359	2.12831	9948	6408	309543	10720	187727	27490	24482	24818	45670	15966	28010	18707	43630	100786	327840	412959	434251	456685	432584	445436	446111
	360	2.13426	10096	6119	318204	7932	192162	27549	21795	30570	46091	16398	23789	18474	39575	97508	326588	399890	450584	444721	447056	452128	446111
	361	2.1402	10345	5833	316428	8090	191770	31400	22697	30775	47769	16082	22610	19162	39575	93757	337214	411216	430203	443860	443817	448110	446111
	362	2.14615	10175	8432	324364	7620	195522	32519	24468	29448	45257	16317	20730	18940	41037	100243	334845	414697	430912	455536	446103	445891	446111
	363	2.15209	10937	9308	320850	8492	188999	31100	22038	30836	48757	16031	21154	18816	39989	94000	333954	414136	441207	454225	442395	446296	446111
	364	2.15804	10242	8708	318429	10848	188165	31807	24753	30471	46177	19002	19465	18937	41775	96170	335927	415093	442206	459869	444294	448936	446111
	365	2.16398	10261	5779	311863	7507	180131	32030	24901	30561	45767	18912	19006	19380	44339	95425	331818	410684	445396	438708	444640	447381	446111
	366	2.16993	7972	6459	311697	7813	173804	34574	23814	36358	44275	16253	19973	19708	40317	102018	345545	406389	435488	444420	432475	448600	446111
	367	2.17587	11401	6172	307470	10995	162571	35877	25684	34639	44401	16593	19259	19365	41962	96892	346189	411948	444568	455326	441526	439471	446111
	368	2.18182	24679	7933	295697	10452	159043	37264	24280	39398	43526	16726	18987	17989	40367	101397	356409	402816	440233	457015	434174	447402	446111
	369	2.18776	46259	5595	289495	8253	151143	33775	24989	36581	45031	16481	22355	18459	42046	101623	359830	411362	432834	453115	441273	448488	446111
	370	2.19371	84260	8618	284431	11328	148864	34080	21736	38483	41085	17589	19519	22081	40455	98439	364079	405530	444145	441659	442451	446429	446111
	371	2.19965	131950	5244	275218	11807	148437	33883	22614	40777	40769	20294	19412	19082	40201	100612	368669	414800	444966	457855	435486	447475	446111
	372	2.2056	182010	9021	271466	9176	144608	33263	21981	41244	43311	17235	21629	18385	44732	97723	391900	411733	449305	459163	441960	448831	446111
	373	2.21154	229140	6111	266530	11061	142270	34032	22635	39840	41705	17330	19123	21628	42955	105046	399671	409518	447043	454264	441610	451731	446111
	374	2.21749	271766	5959	260696	8379	139558	33596	22387	44558	45617	21222	18612	18468	49051	100275	400456	411953	442165	460155	438720	447549	446111
	375	2.22343	301972	8271	256094	7885	143726	32582	23187	39315	45660	18443	18178	18921	48508	102704	424290	411357	445467	451684	442960	437405	446111
	376	2.22938	328603	5774	248231	10788	141890	32334	25821	41144	46420	21509	19734	18151	43719	100520	434148	414694	449443	455822	441485	445239	446111
	377	2.23532	345577	5318	239698	8378	139335	35179	23213	43111	50168	18541	18775	18645	47284	106623	444683	405719	436931	453059	442129	448669	446111
	378	2.24127	367636	6040	226912	8319	142268	30256	23177	45275	53818	17882	19161	22175	41127	99371	441604	411438	449383	457463	440089	447487	446111
	379	2.24721	376377	8556	210512	8450	141910	29281	22315	42370	57835	18074	19180	18948	39981	101236	434351	411952	447139	452743	439144	445758	446111
	380	2.25316	387689	8716	188726	10981	133326	30100	22953	47502	61922	17603	18904	18580	40684	102288	416228	400400	447409	459143	444005	442553	446111
	381	2.2591	397096	8320	182417	11478	135115	27327	27110	41774	65097	17771	18967	18369	49361	106759	396288	411769	444819	442310	436154	446535	446111
	382	2.26505	400350	8235	165749	11611	124081	29919	27894	46336	72921	20038	18919	19619	89256	105764	389514	403797	448775	454080	445657	446885	446111
	383	2.27099	404478	6064	148613	12239	123115	25118	24742	47820	75137	20320	19067	19948	193005	101380	374103	416208	446081	457097	441856	437943	446111
	384	2.27694	411943	8070	133195	12791	114555	24419	26298	44058	81655	20207	18392	22784	389096	103650	379242	402722	435075	445617	440429	434808	446111
	385	2.28288	417703	6222	120224	18087	105366	23477	25824	42910	81899	19854	18786	19295	584972	104104	383292	414508	446197	455541	434474	442992	446111
	386	2.28883	411918	8518	109135	27515	99251	22338	25417	47753	86776	17553	21767	22634	638308	103529	372153	413894	436994	458601	443954	442753	446111
	387	2.29477	404201	8718	87976	44251	91169	25162	30242	41621	90666	17455	18793	19269	526547	105446	372024	411051	452312	463732	444847	447063	446111
	388	2.30072	414921	8727	85656	69024	90268	22470	26467	41611	94280	19071	19709	19568	351936	109026	388959	402823	436185	456427	446095	437093	446111
	389	2.30666	417501	8549	74447	95874	82401	20841	27104	38504	99172	17319	18861	19758	208039	105051	393781	413874	446863	452714	442192	447268	446111
	390	2.31261	411220	5394	55833	119919	71605	24032	30158	42927	107309	21751	19677	19526	126088	103788	398429	412226	447028	455917	444548	443562	446111
	391	2.31855	417018	5898	47957	146734	71618	23648	28048	42214	110625	18933	19661	19394	92666	104204	392196	415840	443581	456695	442101	446338	446111
	392	2.3245	420918	8487	47055	159593	63977	22032	28783	41347	117784	19805	20007	20159	75384	104805	405911	412919	444857	455684	432914	444985	446111
	393	2.33044	420085	5817	40917	168731	54820	25524	31538	41308	119874	20138	20497	19865	62535	109641	405890	411230	435037	448800	439708	439506	446111
	394	2.33639	423529	5671	35153	180352	51428	22169	29561	46390	127275	21141	20357	23475	61366	107547	411490	417182	449841	457434	435495	445371	446111
	395	2.34233	420207	5715	25040	185307	45353	23325	30804	43875	126055	22376	21538	20327	57900	108545	412883	402498	451288	455739	443976	448091	446111
	396	2.34828	423045	5811	30131	182629	40637	22151	33572	45570	123661	22381	26832	22084	64617	104921	424368	408223	444516	447156	445930	435731	446111
	397	2.35422	420755	6158	28221	188909	36401	23558	33780	49269	129597	22082	25516	21793	109562	114473	430796	411971	449155	448769	444475	444559	446111
	398	2.36017	422377	8680	18723	192759	28772	22967	36644	52853	128964	22963	27578	26028	232762	107437	444696	403410	441092	460739	431336	442333	446111
	399	2.36611	422763	8881	27376	190489	27010	23870	36582	50181	122081	27192	29321	25442	447893	107597	475580	413966	446047	455566	438296	444506	446111
	400	2.37206	423707	5299	26713	188560	22161	23944	36232	52775	118964	29231	36013	26079	691788	110546	484132	413708	448252	456755	440172	435546	446111
	401	2.378	418138	8986	17683	186872	22878	23778	39309	57553	120040	29612	34856	30720	793675	113263	485941	412035	449609	458815	435856	444693	446111
	402	2.38395	422824	5709	24812	186515	18288	25994	38943	55026	111727	26660	38017	31626	683323	112142	477474	413857	446567	462862	445936	442828	446111
	403	2.38989	417309	8579	25316	185199	16690	28693	38789	57446	98759	31195	43208	35151	438977	111915	469325	404934	450558	451587	441789	447682	446111
	404	2.39584	418833	5891	25489	189225	16334	26168	41960	59984	91213	29265	40073	39241	245229	116455	444464	413722	449380	461375	442435	444978	446111
	405	2.40178	416923	5548	25284	187927	14318	26540	41616	62596	79114	30444	45442	52246	139686	114870	429543	416260	446271	462737	444039	447020	446111
	406	2.40773	418237	8847	17098	192311	15065	26263	44587	57134	65523	32690	44199	57895	95583	119704	403357	416748	442274	457072	444566	452755	446111
	407	2.41367	419787	7971	17423	186664	17005	26956	47285	62185	50496	38620	43315	72700	80046	115141	401942	414726	449418	440570	441785	448164	446111
	408	2.41962	416962	8440	17585	194954	16951	29814	47538	57790	41176	39330	40344	91064	73036	117943	396045	416318	449386	456875	440414	448071	446111
	409	2.42556	416570	8925	25783	191729	13953	27364	50784	55535	31482	49090	33878	111096	67665	116608	402552	406257	451407	453177	441371	444883	446111
	410	2.43151	415430	8387	25497	194074	14926	27564	50558	54756	23207	48374	31223	138450	63160	114889	410917	415718	450103	462053	443676	439911	446111
	411	2.43745	418421	6507	18359	197833	14128	28992	52165	53820	19468	50090	28602	169605	61947	113736	416735	414593	450256	443344	442509	438959	446111
	412	2.4434	415858	8569	28040	200376	17112	29330	53333	49308	17959	50006	28747	207149	59418	111452	419317	408842	454053	454930	433941	448052	446111
	413	2.44934	415544	8244	27798	197898	14671	28105	55380	52201	15805	51798	25568	236202	60095	112220	436164	418682	451135	457578	442118	445920	446111
	414	2.45529	417001	6205	27862	196864	14847	27033	59491	48714	14641	53547	20130	272042	58586	114418	430464	404830	448641	442277	441845	446203	446111
	415	2.46123	413911	8245	29326	198708	15391	27333	61363	47990	15098	58673	22278	296562	55679	113992	420037	408281	442267	447888	437004	443448	446111
	416	2.46718	412787	8502	28984	205231	14338	27250	65405	50806	14885	55227	18608	298447	57616	120608	415628	415884	441073	449071	441425	449414	446111
	417	2.47312	410524	6018	29377	213785	17136	26998	66888	51663	14493	57878	17855	289612	55525	113546	402271	409467	451310	443591	437931	446742	446111
	418	2.47907	405314	6455	29813	222562	14768	26332	69390	56100	14305	58542	16791	259737	55319	115439	390282	416124	448203	448297	446402	437791	446111
	419	2.48501	412751	9830	29564	219818	14985	25743	72915	59992	15514	58965	17270	230847	54164	116451	380601	413235	451661	449855	444942	444098	446111
	420	2.49096	412494	10167	29503	224559	15802	25240	78102	58464	14725	62951	18357	183536	57973	120757	370181	411364	449772	460380	444136	447420	446111
	421	2.4969	409992	11544	29661	218578	15315	26876	80740	66247	18468	60765	17344	136344	53807	116241	372048	417250	448142	444110	446008	446437	446111
	422	2.50285	409727	13528	28843	214062	15030	21667	80851	68277	17925	61196	17957	105296	57126	119023	355495	414739	438238	453843	433910	449071	446111
	423	2.50879	409086	14170	30137	212892	18927	20119	82940	72411	15093	62069	20090	81658	53799	115623	355886	404915	451309	464584	444980	438138	446111
	424	2.51474	410397	13641	20539	207033	15307	19715	85078	79149	14768	61031	16996	76512	52214	123336	364309	416689	439301	454091	445323	452851	446111
	425	2.52068	405736	10507	30342	203346	15100	19401	87292	83193	15509	63165	17997	76430	49763	116857	347981	406082	453198	462288	436715	445855	446111
	426	2.52663	404245	10887	30419	205141	15659	17983	91463	88686	14266	62617	19702	84987	50840	119617	346329	408370	450998	459386	444036	440080	446111
	427	2.53257	402293	10227	21358	198468	18349	16657	95689	91975	15351	68641	20639	106361	54753	117627	352858	419546	440889	457374	444000	437713	446111
	428	2.53852	401373	13564	30591	198463	16976	17761	94462	100843	14956	64769	21112	121932	51040	122919	360087	414738	449902	458379	436963	448774	446111
	429	2.54446	399023	13955	29849	196881	18013	16030	95772	99768	17919	63994	22605	147459	51783	119672	342611	406223	443040	448295	435924	444738	446111
	430	2.55041	399928	13394	29969	199827	19428	19625	97792	106734	13989	60841	24641	162247	50428	119578	340725	421745	448203	451925	440085	448219	446111
	431	2.55635	399067	13718	29430	198960	24372	20678	101263	110647	14627	56845	25751	181463	51515	126541	345135	407721	452939	465405	441770	443403	446111
	432	2.5623	402873	11779	29825	193888	26710	17435	98658	106814	16990	53279	26744	196296	51867	121796	348388	417107	440081	448352	440440	452286	446111
	433	2.56824	398249	10917	30768	200466	26120	16292	100251	109127	18165	52524	28012	201088	53208	120446	350541	409102	447090	463584	437611	438318	446111
	434	2.57419	392936	14461	29422	200211	28396	17221	98248	110459	14528	49258	27187	193189	51820	125650	357524	411369	452835	465149	442158	443196	446111
	435	2.58013	395078	13930	30049	198546	32092	15780	94975	113060	15177	48318	28772	173179	54315	123247	347545	419005	448555	449000	444039	440042	446111
	436	2.58608	396358	11463	21185	200961	32351	15772	94180	112053	14290	42422	31034	152560	49563	121657	351304	420771	452687	459325	445419	447796	446111
	437	2.59202	388084	14293	30433	198681	31055	16133	91634	112587	14891	43869	26845	127253	50324	121713	359540	425704	451424	448770	436516	437464	446111
	438	2.59797	392832	14457	29297	198174	27583	17954	91410	113912	14952	46331	25710	98781	50127	126512	352986	421918	439874	466636	429080	447170	446111
	439	2.60391	388298	11846	30088	200266	27427	14887	95363	112423	14447	47751	27394	77521	54497	121787	365485	417455	451873	465587	436177	437366	446111
	440	2.60986	388666	11625	30485	201284	25158	14843	88969	104421	15099	45547	24731	62798	50981	127207	363696	413533	454599	455465	444220	433026	446111
	441	2.6158	386580	14741	30633	204476	25505	14802	88354	97216	18004	47132	27388	50046	51150	122308	361666	414083	452442	466325	436935	446167	446111
	442	2.62175	377049	14432	31857	200931	27861	17224	82929	89022	14585	50387	21790	43561	52272	121167	353606	411264	453045	466621	442156	437783	446111
	443	2.62769	380718	15376	31052	195528	25597	14447	80144	74640	14975	54758	21359	37161	49841	122172	355393	410157	457642	456102	437478	447557	446111
	444	2.63364	379467	14836	31150	206641	25049	15074	74357	64735	14601	55057	20587	38098	55159	128981	350253	421758	455561	473237	446545	444352	446111
	445	2.63958	370833	15249	31364	200855	25245	15477	70049	57219	15479	58486	19954	30768	53679	125144	352308	412182	460204	473957	444544	444471	446111
	446	2.64553	353258	12812	32090	204076	24701	14309	63922	47073	18104	61822	21061	33888	71508	130983	364995	421413	456025	457193	433607	438121	446111
	447	2.65147	301871	12274	32221	203019	25702	15810	54353	34137	15097	64893	23141	32745	120269	126071	360419	421489	459272	469975	439893	445953	446111
	448	2.65742	224858	15633	32284	199883	29153	14855	46960	31232	14520	66620	25233	31392	193036	130162	366945	423064	463139	466748	440476	447275	446111
	449	2.66336	137081	15290	32925	201062	29913	16692	43544	26059	14004	68064	25536	31074	253303	125746	369824	422832	461869	480233	439704	446896	446111
	450	2.66931	80967	15746	32575	203231	28111	15240	33967	19066	14173	68855	28549	28103	253501	132947	363143	424254	468515	480835	431163	439122	446111
	451	2.67525	52921	15317	33701	204185	30128	16012	29665	19674	14419	73160	30990	28035	207768	125996	364719	423282	467150	481327	437372	441707	446111
	452	2.6812	45876	14844	33293	203755	28871	18792	27197	16531	17880	69178	34959	29970	135760	126413	356865	424546	472557	476793	436363	449179	446111
	453	2.68714	47164	11972	34450	199989	29280	19497	22738	15135	15239	67135	41495	29836	91412	134144	364803	415357	471754	459709	446297	444088	446111
	454	2.69309	47205	11543	24279	204502	30253	16048	21356	16635	17917	65194	48459	29629	66163	128588	366534	415307	474709	474534	445390	447133	446111
	455	2.69903	49811	11323	34058	204820	33022	15909	20026	17700	16719	72197	57317	31950	59753	130134	357442	422979	484222	464668	441112	450135	446111
	456	2.70498	50567	14318	35572	208247	35377	14621	21220	14343	14563	93795	68009	33199	54373	135568	357281	414026	474200	473057	436450	445357	446111
	457	2.71092	53163	13132	35706	207262	35735	15163	20722	14179	16004	130338	77878	35736	53612	127958	361707	423646	490043	473960	439628	445357	446111
	458	2.71687	54494	10506	34706	202619	36886	15296	17861	17582	15019	189835	99341	40005	53754	136831	360292	424998	487449	472815	445899	445357	446111
	459	2.72281	56192	13877	35482	203570	36634	19029	17547	14066	17684	280715	125686	45376	54767	130271	354613	426556	508126	473541	434522	445357	446111
	460	2.72876	55871	13886	35785	200891	37891	19963	18098	17772	15656	405465	148671	52295	52107	131943	365908	421086	510224	470297	441275	445357	446111
	461	2.7347	59595	11950	26420	208150	39145	22882	17451	13851	15301	542052	186170	60741	54744	133114	359554	420661	509413	468139	432507	445357	446111
	462	2.74065	62772	14455	27050	206608	41921	20887	21807	14246	15440	680222	226017	73160	51795	137286	374752	419345	515652	470279	439530	445357	446111
	463	2.74659	62185	13143	28403	213056	48291	25040	18317	14567	18063	869975	272106	92058	54882	139325	373609	425150	526443	473508	439663	445357	446111
	464	2.75254	68021	15593	37351	211005	46271	27359	17431	14237	14949	1078927	316562	118282	50219	136882	391861	427654	530301	470497	440836	445357	446111
	465	2.75848	70796	13769	27200	212475	46623	31075	17289	14563	16766	1271242	365983	152395	52472	137656	419267	412252	541449	464440	431643	445357	446111
	466	2.76443	71163	16302	35853	218994	53509	32523	17008	13708	14558	1467896	420985	194367	54996	134650	458730	417913	550429	484804	440222	445357	446111
	467	2.77037	74398	12770	36308	217740	52361	35042	20287	13575	15382	1659655	475321	250353	55434	141985	531376	412573	553028	478628	443846	445357	446111
	468	2.77632	75646	12733	37667	221239	53745	33734	18121	16291	17303	1857858	530651	325062	50811	142254	614354	423276	569079	487978	443842	445357	446111
	469	2.78226	81952	16876	37364	221373	55224	34539	17435	14721	15350	2107534	582183	414036	51529	134965	712158	426435	571087	469328	439822	445357	446111
	470	2.78821	84751	13232	36196	222686	59689	35211	19961	14758	18826	2299693	629630	500960	55171	134364	816918	418182	598822	484361	442844	445357	446111
	471	2.79415	88145	13840	36835	222326	58435	33626	17621	14510	16445	2528372	636589	590159	55308	137557	899765	415845	608422	465807	432966	445357	446111
	472	2.8001	94645	13303	25956	223652	64375	35668	20662	14381	16726	2720438	637746	656898	55178	136651	970794	423472	610021	481837	435290	445357	446111
	473	2.80604	93814	14064	37399	221742	62037	31882	17971	14921	16845	2895093	597556	706320	49649	136967	1012858	414663	633876	484842	435173	445357	446111
	474	2.81199	96912	14793	37062	224917	70420	32982	17854	17121	16938	3111496	531346	702527	53795	137340	1018165	422304	647821	470349	440060	445357	446111
	475	2.81793	96627	17812	35249	226701	72340	31183	18056	17335	18346	3469251	438119	656834	57895	138224	998670	423226	644805	466417	434297	445357	446111
	476	2.82388	93322	17113	24819	222888	79257	31590	17343	14628	18529	3598775	349688	573964	51294	143220	933260	419066	648718	478366	443910	445357	446111
	477	2.82982	88548	15226	25053	223459	89817	33153	17917	15238	17525	3814017	257053	464976	51835	142433	843098	424823	657555	477345	443089	445357	446111
	478	2.83577	85210	18326	23822	224427	97128	29648	17663	14665	18361	3872783	184430	351995	53214	136046	754296	412389	661978	492309	444912	445357	446111
	479	2.84171	77553	15791	21713	218193	115073	30399	19246	17969	18975	3348407	128258	239830	54275	139151	660072	413866	688821	494939	434139	445357	446111
	480	2.84766	76081	18797	22184	216619	134269	30931	17459	14387	20551	1883827	95724	159384	53411	137506	570711	427600	698708	498961	438264	445357	446111
	481	2.8536	66705	19199	24991	221277	149219	34695	17408	14011	21771	537901	70357	101680	56339	139493	489642	422728	710425	504486	446204	445357	446111
	482	2.85955	68120	17211	24948	218746	159685	31284	18233	14435	23981	138972	58860	64854	60172	136214	447827	421550	714540	504697	445844	445357	446111
	483	2.86549	63063	16984	21008	215728	170561	30425	18984	14200	28985	65458	49539	43070	55803	145042	417609	424689	719079	512808	448403	445357	446111
	484	2.87144	58070	19573	23567	216797	176524	30138	21454	15627	29274	57665	47102	33040	56689	145127	398022	424935	724981	515299	434713	445357	446111
	485	2.87738	55598	17030	19802	210781	179465	30703	18471	14362	29163	50423	45286	30481	56747	145065	407367	420740	725855	521099	446617	445357	446111
	486	2.88333	55934	17855	20590	213272	182503	29908	20964	14663	30459	47958	47326	32248	57467	141690	436768	425855	714821	522096	442534	445357	446111
	487	2.88927	50871	17395	20257	217937	188061	32579	21021	17308	31212	48407	47061	27983	62562	139643	499036	423931	707885	521301	447187	445357	446111
	488	2.89522	47518	17888	20453	216200	191926	32753	17573	14901	31425	45738	39635	28135	59828	148513	588341	414922	712813	518576	446378	445357	446111
	489	2.90116	47788	18463	19352	227028	191891	29314	18523	13102	31627	47751	36234	30688	61287	146026	697723	426722	702827	522553	446620	445357	446111
	490	2.90711	46002	19155	23272	224701	201139	32728	22668	13938	33031	47959	32497	26517	69133	139520	821391	421660	682345	536035	444410	445357	446111
	491	2.91305	42568	21354	22733	221711	205484	28590	19811	13478	30730	43065	29906	25605	65137	147994	980691	428487	691880	535591	443218	445357	446111
	492	2.919	39987	20926	19707	224375	203359	27232	18989	12868	34117	40673	26600	25970	70130	146981	1095969	417448	686165	534118	442442	445357	446111
	493	2.92494	37784	23601	19138	229270	203597	26579	22432	16107	31689	43922	24347	26108	72026	151731	1203382	420667	668894	527585	446020	445357	446111
	494	2.93089	33063	20801	19935	229989	208290	26190	21090	11967	31144	43881	23400	25260	69081	150850	1242412	418655	662005	517380	446593	445357	446111
	495	2.93683	30879	25286	22246	231403	205086	26585	23212	12355	29475	38338	24715	25639	71341	152500	1209592	428667	651997	506451	444707	445357	446111
	496	2.94278	25314	26554	22894	232760	210659	24977	20938	12400	27284	44335	22360	25609	71530	154295	1127225	415744	655381	518972	446955	445357	446111
	497	2.94872	24393	26373	19762	228782	208926	27013	20690	11869	29069	42608	23119	24969	74334	147838	1009411	430423	646824	511098	448831	445357	446111
	498	2.95467	23352	23009	20482	233299	204011	27621	21381	12509	25873	44089	23185	23624	74386	148792	868989	424662	624805	521135	436247	445357	446111
	499	2.96061	20954	23759	25377	237294	211145	23351	21291	15866	24900	41257	24212	23626	75890	148263	727805	425688	630352	521731	435772	445357	446111
	500	2.96656	14881	24909	20915	240256	209972	23980	20481	16163	27018	44348	24755	27798	75272	155049	616442	425309	620710	539019	431055	445357	446111
	501	2.9725	14049	29336	22358	243289	209501	24098	22141	12324	23984	42546	25563	24144	74531	157533	532975	418544	612600	546335	442093	445357	446111
	502	2.97845	15904	25152	22304	244565	206889	27891	25178	15337	23628	42194	26090	24075	75147	150742	472405	416383	584847	552450	445547	445357	446111
	503	2.98439	14802	26855	23077	249723	202789	25486	22243	16686	24572	48106	33993	24260	73144	156900	440803	432130	592671	537955	444305	445357	446111
	504	2.99034	13660	26903	23543	254186	196665	28059	22886	15889	25161	46042	29664	24229	73467	152056	421090	428330	588491	552080	447269	445357	446111
	505	2.99628	12852	29108	22523	254165	194450	36420	23918	13378	25242	49928	31751	27577	72784	158561	412849	416600	572761	554529	446722	445357	446111
	506	3.00223	12123	28098	23554	258885	183894	54543	26556	12856	26372	49288	34330	24221	74207	159462	407165	424273	580465	551969	441699	445357	446111
	507	3.00817	8943	30644	23973	258609	177438	91463	25077	12947	28850	49905	37462	24610	75884	159233	402513	418556	582739	545847	446258	445357	446111
	508	3.01412	8386	31099	28028	263194	168737	155558	25835	13404	28099	54481	40836	24865	70006	154122	401321	425251	589721	536262	436920	445357	446111
	509	3.02006	8319	29855	25393	262916	160228	250655	26717	13460	29140	55946	44903	24179	68659	154342	396988	426931	586727	530545	443773	445357	446111
	510	3.02601	11738	33652	25273	261976	157493	388784	26188	14323	27057	61864	50005	26938	69368	156242	387810	425708	591505	532104	447283	445357	446111
	511	3.03195	12013	34854	25429	260045	152304	561860	27729	13869	29405	66209	55853	28209	69340	156320	394402	425002	581232	532407	435633	445357	446111
	512	3.0379	8303	35747	29169	263358	143192	777334	28662	14177	32738	71538	64580	32174	70315	155781	382717	428262	573074	537326	444102	445357	446111
	513	3.04384	13697	33659	26179	261738	139039	1002763	28645	14715	29472	79765	73610	31045	69760	162667	394390	430561	552857	535730	447252	445357	446111
	514	3.04979	17723	34590	27086	259577	127371	1257569	30249	15749	32798	93049	82137	32125	68913	158945	398811	418732	537790	547991	448952	445357	446111
	515	3.05573	24970	39178	29408	259754	120536	1533473	29302	15372	30174	104194	94975	36228	69113	156773	402341	428333	529598	564965	445768	445357	446111
	516	3.06168	28168	37362	27445	258039	112168	1785153	30232	15151	32039	117198	109105	34547	73476	164408	394205	427548	515296	567501	444768	445357	446111
	517	3.06762	32342	41592	30777	264338	102043	2045603	31387	15215	34778	133415	122324	35086	73401	158058	391859	428618	505516	575782	445578	445357	446111
	518	3.07357	39076	42905	31365	272014	98392	2172546	32286	16177	37744	151681	138087	37102	75476	155766	394181	417245	492063	576155	442356	445357	446111
	519	3.07951	37033	42659	31405	279004	98220	2105412	32615	16582	36206	159563	158431	40177	75520	159064	384601	421932	490377	578945	437570	445357	446111
	520	3.08546	40660	43276	27927	283389	92150	1725580	33799	17815	35550	170660	175054	42753	79267	162696	384261	427913	482196	577153	443867	445357	446111
	521	3.0914	41804	47938	29547	300706	88106	1083808	37119	17330	37663	181293	195520	42560	74437	164826	389617	432994	475853	568435	437067	445357	446111
	522	3.09735	40798	51814	28621	305606	88922	536176	38196	18601	40104	179108	220303	46031	74595	163060	403303	430476	456754	568154	445473	445357	446111
	523	3.10329	41056	49503	31627	317254	88399	237980	38391	18793	42361	178116	248556	48057	78288	171204	428285	426610	461031	569915	444564	445357	446111
	524	3.10924	36992	53505	30264	315002	86362	124174	38036	24810	43305	164498	278509	50460	78095	168278	466549	429633	464386	575389	444125	445357	446111
	525	3.11518	36070	52908	33481	316093	84717	87372	39065	33024	45187	154554	314471	51825	77654	166433	501411	428473	460646	583795	436176	445357	446111
	526	3.12113	39755	54551	30247	304229	84946	74006	34789	37669	47745	135789	342565	50824	74616	170007	560860	416895	465289	593875	445197	445357	446111
	527	3.12707	32766	56637	30271	289134	78915	67099	37647	42431	51373	120734	392581	52993	73817	165893	612935	417579	461896	607005	442598	445357	446111
	528	3.13302	38167	61762	33305	270347	84541	58707	35202	43124	57535	100634	412534	48269	69561	165058	647338	430407	463669	612661	442243	445357	446111
	529	3.13896	34647	64241	29575	246694	81824	55135	36383	45122	56735	90739	444888	47523	70058	171131	649186	430598	460569	623418	441064	445357	446111
	530	3.14491	36286	63049	29748	222281	78272	53152	39623	49685	60064	78017	466276	44415	68055	172782	618935	431392	458636	618162	446629	445357	446111
	531	3.15085	35820	67113	33348	197870	79830	46984	36330	47967	61450	67488	469942	41936	68498	171969	577598	432504	459863	621863	439728	445357	446111
	532	3.1568	31843	74571	34712	193897	80903	42673	36616	47162	66053	60779	481309	40320	67035	174292	526430	433055	442744	607485	443746	445357	446111
	533	3.16274	36058	76882	31747	206091	82628	37055	36667	46531	70568	55612	476394	33463	66307	166497	493320	427199	445933	585549	444502	445357	446111
	534	3.16869	35327	76796	34319	258143	82351	32711	38628	47363	72168	49454	461374	32176	65005	163477	456230	419398	447518	562395	437875	445357	446111
	535	3.17463	34513	84996	34827	354526	91132	28968	36916	48262	75137	45207	421586	30619	68491	165400	426149	425659	445081	546557	441303	445357	446111
	536	3.18058	33842	89385	31294	501703	121930	29025	37455	48066	76929	42805	377898	32506	64392	168370	411696	429032	452702	525539	445179	445357	446111
	537	3.18652	29566	92748	32591	712682	171002	24509	36772	47550	81705	42115	329026	31808	65182	167547	402779	423662	448447	503986	444820	445357	446111
	538	3.19247	33108	91546	30644	948396	245976	22549	36749	49367	85174	36170	261862	28541	66607	167216	395997	428093	449621	493664	448044	445357	446111
	539	3.19841	28212	93939	31996	1210889	356171	24892	38875	46837	82572	39110	205987	27575	66352	171600	396100	425045	449962	500046	446251	445357	446111
	540	3.20436	31487	98958	31914	1443470	498325	22918	36451	50590	83491	33044	152068	26302	70364	167313	381595	428374	435290	495030	444162	445357	446111
	541	3.2103	26949	100062	37163	1712694	674226	20638	37196	49005	84751	35916	107523	29944	66231	168693	383465	424315	450519	485203	442886	445357	446111
	542	3.21625	30295	100020	35362	1975435	859355	25266	36816	45663	86862	36313	74861	25747	70960	176866	384665	426009	437514	496386	434837	445357	446111
	543	3.22219	26118	99240	36866	2242185	1043011	21576	36380	45252	87961	36050	53549	24520	69576	169937	394987	420108	434750	491041	443712	445357	446111
	544	3.22814	27179	99544	32073	2510824	1219481	20582	36361	45644	85228	31948	40486	24835	68983	169226	398035	423460	445776	490415	440410	445357	446111
	545	3.23408	28280	100729	35093	2709275	1399887	20676	36867	46276	87074	34663	35863	25032	63921	171306	390781	425518	452437	484487	436266	445357	446111
	546	3.24003	25173	97027	32136	2926456	1545060	22426	38531	41170	80046	32108	28055	24674	63194	170970	417992	416451	450654	484483	449086	445357	446111
	547	3.24597	27441	101007	35926	3080555	1662197	20247	34805	42644	80660	32470	24893	24255	64079	170447	425915	412697	450654	478956	440909	445357	446111
	548	3.25192	25285	101860	34977	3288149	1794288	20153	34276	45321	69874	35991	26963	24674	62147	172412	470199	423159	446299	462065	444680	445357	446111
	549	3.25786	24796	100173	32208	3480285	1895101	20356	36156	43137	61947	31713	25236	25253	62602	173355	509031	415820	451930	472705	448661	445357	446111
	550	3.26381	26294	100270	31208	3635541	1969738	21518	31759	45635	53413	32660	21358	26053	67665	180421	567859	422896	439916	465658	448175	445357	446111
	551	3.26975	24122	100516	30075	3807045	2084494	17780	30228	42690	45138	34499	24425	24581	69665	180118	627234	415940	438381	469432	443767	445357	446111
	552	3.2757	24507	102156	34036	3936337	2118989	21363	31786	40018	39968	32487	20579	24530	76278	183349	688870	414116	444630	457655	448908	445357	446111
	553	3.28164	25611	99100	33643	4042585	2189023	18452	29037	39987	33042	30998	20237	25397	110632	177449	731899	427297	453666	463194	436034	445357	446111
	554	3.28759	25867	95894	29867	4128480	2217001	18805	27640	41529	28566	32802	19706	25056	175526	184603	783707	415979	439102	478020	442970	445357	446111
	555	3.29353	22940	92029	29182	4124752	2270909	18281	28008	37502	28749	32163	18753	30207	253405	187639	792001	417968	447616	483716	447444	445357	446111
	556	3.29948	23467	85415	32960	3969887	2265437	18070	30411	37450	25266	31659	17852	26959	289572	185808	759716	426032	448676	482116	442588	445357	446111
	557	3.30542	23883	80745	30806	3569547	2276566	18303	27606	36734	25087	34336	20196	26525	259425	180998	730272	429500	447862	493236	442668	445357	446111
	558	3.31137	22811	75552	27123	2790383	2271012	17991	29034	32575	25276	35841	17410	27086	194857	183812	651610	425242	442951	484879	445108	445357	446111
	559	3.31731	21614	70117	29107	1829896	2259984	21353	30200	31004	25610	31362	18119	28098	141482	183579	589786	421422	444533	483766	437411	445357	446111
	560	3.32326	23607	64850	27841	947550	2281434	17957	30279	32419	31451	31188	16720	27234	110830	189468	541063	429553	452423	494436	446511	445357	446111
	561	3.3292	22949	57668	23763	416228	2217730	18064	36410	26877	29631	31923	16369	32802	100410	190848	503122	429797	453951	477819	451568	445357	446111
	562	3.33515	20840	53377	22555	174095	2173280	21843	38021	24738	32257	34594	17618	30287	93407	190725	480569	428033	447959	482196	444801	445357	446111
	563	3.34109	20750	48163	22956	87022	2149728	21587	34652	23632	34138	30987	20537	31837	88680	189834	483833	428889	449085	488615	448772	445357	446111
	564	3.34704	22472	46928	19448	59287	2119366	20797	41610	21838	36254	37037	16571	35405	80937	191318	496219	426961	438783	490507	450029	445357	446111
	565	3.35298	22402	43674	19052	51617	2100785	21360	41049	21945	44594	35833	16011	32666	82804	179555	541161	430147	438024	480206	443298	445357	446111
	566	3.35893	21917	41387	18696	49376	2035640	18413	44353	20850	44133	31380	16904	33944	95889	181810	592022	426921	441063	486963	446160	445357	446111
	567	3.36487	21933	39043	16663	46245	1974498	20994	47333	23346	48507	32311	16984	33828	109695	185473	633229	427394	445016	481875	435416	445357	446111
	568	3.37082	19589	39224	18638	48622	1941282	19430	47951	20487	51826	32297	16458	35109	139103	182328	666356	431655	449968	478973	438427	445357	446111
	569	3.37676	21815	36301	17389	48505	1928503	18583	52089	20830	56703	35466	15802	34762	175184	189262	680184	417207	450445	482457	443510	445357	446111
	570	3.38271	22530	35322	15746	47811	1877715	19227	52002	21053	65264	34473	15986	39069	208835	181295	672153	417071	450996	499534	435860	445357	446111
	571	3.38865	19508	35813	15457	46518	1833688	18867	54161	21807	65063	31388	19715	37366	223867	192453	650368	428003	446142	502861	435264	445357	446111
	572	3.3946	21764	33322	16756	44229	1764022	18530	55825	20962	69385	32794	20282	39035	222203	182838	621190	431680	438380	514469	440695	445357	446111
	573	3.40054	21258	35177	15020	47594	1740566	18664	58225	21060	76134	32507	19432	42068	188312	186385	589547	422537	449218	505787	442796	445357	446111
	574	3.40649	21794	35826	15546	45010	1676071	19321	64587	21206	81186	33629	20981	39934	155978	184804	545366	432271	446317	518509	446284	445357	446111
	575	3.41243	19517	34682	16852	44897	1660207	19337	66582	22002	87018	35966	22908	41354	119709	187811	531565	423365	450499	505374	444226	445357	446111
	576	3.41838	20974	34231	14782	46068	1622183	19156	63441	22616	90216	33201	26125	41491	102164	189454	503615	429117	434793	512321	445743	445357	446111
	577	3.42432	19647	35018	17957	43134	1595423	18331	71644	23431	96746	32781	29265	41029	90728	199137	473612	433530	448900	511054	432533	445357	446111
	578	3.43027	19242	36668	17810	44956	1576112	19367	67911	25863	100000	32259	27252	45004	88541	191165	449432	423918	444936	499960	434749	445357	446111
	579	3.43621	20370	36642	17528	45760	1545296	20815	71338	23754	105365	35562	23702	42643	79884	200181	445665	433096	447846	484499	447063	445357	446111
	580	3.44216	18236	39451	15317	42182	1513499	18243	76701	27633	111465	30493	21617	41050	78703	192075	419190	419909	445606	491456	444048	445357	446111
	581	3.4481	20492	37337	15618	39054	1512551	18437	73212	26362	117995	31574	24007	36853	75451	198137	418949	430168	449191	479513	445513	445357	446111
	582	3.45405	19142	33940	15379	39177	1504927	17269	77735	26736	123212	31136	20968	36225	75523	201825	415397	418405	446963	485715	440261	445357	446111
	583	3.45999	18577	33343	15023	36409	1498091	17363	74962	32533	118815	33307	21174	36010	73258	192433	401013	420775	448616	480442	439826	445357	446111
	584	3.46594	18424	30548	14880	33757	1521236	16881	77443	34788	119473	35604	20591	33864	72170	198276	408175	427311	447930	485377	432220	445357	446111
	585	3.47188	16632	28678	17027	30628	1517524	16687	81543	37758	114561	32409	23111	31717	70813	195778	413338	419630	447515	487607	447544	445357	446111
	586	3.47783	16226	26762	16159	28363	1533386	17674	82144	47728	107543	33294	23074	35856	74711	195193	416676	431039	446982	476694	437696	445357	446111
	587	3.48377	18213	24153	17911	28496	1563012	18286	87084	60073	98482	37341	22409	30454	73977	197145	423927	425513	452482	498787	442761	445357	446111
	588	3.48972	17169	25652	20542	27054	1614108	15198	87350	70652	86832	34834	23743	30095	69767	195042	438975	416863	452365	502000	439287	445357	446111
	589	3.49566	16966	26147	25726	22932	1691056	15251	90718	74674	81821	34596	22341	30103	69986	205010	464311	427298	451007	510460	443348	445357	446111
	590	3.50161	17081	24889	26426	21491	1790515	16362	94929	76577	64006	35451	22340	29239	67326	204502	491506	427177	437584	511278	440362	445357	446111
	591	3.50755	16698	24484	28304	20620	1852832	14705	94448	73309	56184	39508	23071	29297	72078	194362	510550	427945	452990	513441	442158	445357	446111
	592	3.5135	16377	23234	25909	19813	1881091	15259	94898	71884	45427	38390	23086	29203	69066	201995	542230	415831	452350	499160	445692	445357	446111
	593	3.51944	17930	24840	26619	20420	1815955	14006	96466	70726	35018	37682	20789	28581	69623	203118	589931	430003	449152	506757	441517	445357	446111
	594	3.52539	18529	25514	25954	19938	1619713	14191	101264	71755	26886	39454	20245	31391	68953	199537	610015	429708	449283	507555	432301	445357	446111
	595	3.53133	15312	24350	28100	20479	1247185	13802	101678	75633	22915	41786	23218	29324	74507	205978	640909	430114	449465	486739	442784	445357	446111
	596	3.53728	18727	26551	29032	17911	844905	14055	110955	79026	17151	44479	19396	28510	68486	197203	686072	429722	443166	494593	435491	445357	446111
	597	3.54322	16179	27779	27225	17632	524649	14281	112200	80291	15041	47367	18895	30464	66442	209593	701402	425217	439466	493806	445121	445357	446111
	598	3.54917	17942	25270	27130	19331	320511	16394	117014	84928	14543	43741	18350	29963	68332	213179	738337	432240	449428	499347	445675	445357	446111
	599	3.55511	17956	26403	28349	18811	205134	16352	121462	90590	13643	41908	19383	28590	68142	205294	743708	431371	450835	482610	439535	445357	446111
	600	3.56106	16321	27365	26720	18226	147141	14849	113511	91607	13259	41874	17995	33900	66236	209230	740941	434569	437935	490459	443286	445357	446111
	601	3.567	18270	27255	26940	18434	121313	14091	115402	94560	13587	40823	22450	29552	72665	207403	739412	435354	432426	508685	444782	445357	446111
	602	3.57295	16268	28361	27104	18937	107365	14731	120633	94700	13806	40624	19814	29917	66576	215396	708815	430904	440359	517244	442986	445357	446111
	603	3.57889	16960	27911	27350	18267	97287	15475	130154	94571	13362	39551	20344	28962	74577	206976	688447	435058	450448	515950	446473	445357	446111
	604	3.58484	17550	27715	27302	17843	91239	15244	129109	91604	14133	37614	21051	29194	72587	211841	655463	419062	451118	530761	443763	445357	446111
	605	3.59078	15579	28616	28171	16859	85431	16165	135763	91208	15762	34755	25101	33158	69053	217689	616671	424559	449998	532335	440412	445357	446111
	606	3.59673	17101	27928	30089	17287	83692	17863	142014	85707	15505	31574	21749	33847	68534	215799	581454	435968	441550	541547	440141	445357	446111
	607	3.60267	16120	29099	30914	17213	81380	17736	144702	80537	14766	28956	23399	30954	74333	222054	551257	436625	449672	536640	444174	445357	446111
	608	3.60862	17201	29754	29090	16481	78836	18231	152521	73625	16594	29951	22807	31681	70794	213782	539446	425423	444659	530059	441267	445357	446111
	609	3.61456	15337	30939	29223	17337	75251	18653	164141	63257	19218	28644	23958	32815	70485	222820	515633	424784	444099	532071	434194	445357	446111
	610	3.62051	15039	30135	29902	18321	76219	18956	168796	56280	20047	27701	26011	32586	69891	223989	513967	425376	431749	513617	445045	445357	446111
	611	3.62645	15685	28642	31001	18753	73571	17871	176598	52971	20546	26974	26395	34044	72689	220092	506476	441551	447411	523597	446845	445357	446111
	612	3.6324	15384	30015	31815	18095	74334	18631	183230	40966	21736	27131	26799	35698	70040	219985	497050	425037	437336	522903	444113	445357	446111
	613	3.63834	16155	28524	31518	18751	74896	17331	184089	34959	20624	26760	27125	38180	74464	225623	512595	433903	445495	515105	446083	445357	446111
	614	3.64429	17949	28584	32538	18665	71914	16602	189610	31442	23004	26442	27393	38772	74105	223700	519459	436984	450525	509872	440624	445357	446111
	615	3.65023	14961	26570	31647	17651	72947	15654	194456	29118	20366	23030	28004	41354	71118	219723	521880	424588	438519	494692	445517	445357	446111
	616	3.65618	17041	28423	33116	18631	73976	12345	201128	28357	19741	23618	29861	48098	74638	224898	505818	430742	453018	504110	443298	445357	446111
	617	3.66212	15913	27822	34724	19056	72402	10507	201158	30118	19632	23342	32473	48206	71860	218029	504384	434176	444181	501868	444499	445357	446111
	618	3.66807	16638	29724	34949	19533	74716	10664	209157	27691	18759	27382	35944	54208	69489	220727	484622	431024	452512	497353	446682	445357	446111
	619	3.67401	15910	30171	34546	19155	74785	10471	213067	30981	18126	26633	38262	57646	70292	226943	459776	436272	449527	478659	444205	445357	446111
	620	3.67996	14814	30515	34517	19743	71998	9821	210037	31168	17240	27026	40568	67664	70676	219957	448566	425840	437751	491760	442616	445357	446111
	621	3.6859	16882	30442	35857	21806	73400	10985	213967	32163	17038	30128	46082	71099	75291	227850	435536	431501	448932	480297	434242	445357	446111
	622	3.69185	15035	32921	38235	21029	69530	9870	216166	34812	18032	26488	43684	76948	73946	218303	424056	424784	454508	466350	446754	445357	446111
	623	3.69779	16447	32782	36870	19541	63461	10952	215782	36801	17721	28539	43945	76945	71906	220767	418795	433689	442033	467394	446449	445357	446111
	624	3.70374	15395	32875	36934	20818	67582	9627	222430	39376	17042	30776	41763	73514	73875	219193	409792	430624	449145	475839	442914	445357	446111
	625	3.70968	17203	35148	38775	20662	64996	10068	222133	42347	17645	34977	37511	73081	76265	219016	414375	433005	450972	476521	444003	445357	446111
	626	3.71563	15029	32671	38672	23389	66141	9611	223439	44592	18334	40710	33983	62675	68385	221617	410241	434673	453656	474826	442263	445357	446111
	627	3.72157	15546	31917	40355	23992	64125	9229	215827	45697	18711	46267	29780	55819	69260	223548	410235	430417	452035	476794	439784	445357	446111
	628	3.72752	16528	28541	42506	21271	66364	8921	210900	44227	18486	54836	25401	47709	71909	221141	411598	434907	451907	479973	432350	445357	446111
	629	3.73346	16214	26384	41748	23460	63339	9495	200342	47325	20585	61567	22282	42884	71622	231039	408525	436362	450214	467272	441399	445357	446111
	630	3.73941	16216	25842	41380	23505	63772	9111	188976	48658	20027	73427	21731	34612	73081	231854	414219	434094	450692	484952	445268	445357	446111
	631	3.74535	14857	24933	44586	23670	68133	9005	169555	49143	17730	86029	20171	31343	77710	225353	403404	422804	453387	484683	447324	445357	446111
	632	3.7513	15343	20574	46292	22875	68994	10026	147991	50965	15780	103671	20155	30975	78872	233212	407117	434156	437447	486883	434155	445357	446111
	633	3.75724	16562	20495	45538	23156	66520	9979	121724	52190	16074	122696	19760	28288	85811	229046	415268	435616	444242	482256	443124	445357	446111
	634	3.76319	14369	17261	49766	24040	69710	11276	100562	55023	14013	146350	20184	27079	83587	232893	434935	417754	453539	493300	433994	445357	446111
	635	3.76913	15431	16560	49656	25058	67526	10223	78672	54895	12775	164623	22700	25728	81217	237386	433868	425094	451429	499191	446190	445357	446111
	636	3.77508	15198	15715	50275	23321	71122	10792	57913	54493	14908	184748	24523	25728	84885	239966	452217	423949	452924	504132	444316	445357	446111
	637	3.78102	13715	13239	52192	24398	70076	10629	42591	55711	12110	205706	29219	23871	86789	244676	477714	436886	443574	488508	444486	445357	446111
	638	3.78697	13051	12934	51293	23759	67966	11487	30319	55757	13847	215247	30276	25073	81053	242533	488989	432344	436713	503915	445382	445357	446111
	639	3.79291	14033	11697	52918	26086	67506	11636	23904	53956	10805	226377	32039	25939	79514	241814	491299	435158	443548	500083	448948	445357	446111
	640	3.79886	15087	13114	52067	24885	67758	12338	20336	52058	11132	224293	33467	27665	80711	244663	482354	431289	442809	508632	442572	445357	446111
	641	3.8048	13167	10965	51825	24008	64525	12048	20654	49434	12467	215457	38962	29083	76204	243648	475452	430948	452301	497388	440609	445357	446111
	642	3.81075	13347	11468	52095	23537	64683	11545	22758	43812	10906	198469	37609	33089	80265	239868	450508	437578	452165	507895	442295	445357	446111
	643	3.81669	13167	8837	55368	23779	63640	13688	24395	40345	12583	176091	37905	34325	80857	236943	437252	436584	442990	499380	443073	445357	446111
	644	3.82264	14560	11423	55101	23704	66116	12165	26908	35612	12670	147869	35252	33487	76443	238662	437721	431326	447914	517386	446369	445357	446111
	645	3.82858	13176	9317	55988	23242	67883	11957	26762	31225	10277	116910	33586	35291	79938	233848	428012	431208	447660	510967	443543	445357	446111
	646	3.83453	12440	11005	54978	23375	68254	12698	25515	25217	10001	91669	29529	35269	78906	234931	429505	434143	448585	510010	444280	445357	446111
	647	3.84047	12471	8889	55931	25061	67780	12326	23560	21860	10169	69614	25886	32717	75482	232861	427218	436792	449111	499655	443726	445357	446111
	648	3.84642	11765	9964	57652	23557	65562	12873	21587	20760	8800	56978	22116	32592	76822	236301	423043	424254	448388	493088	442325	445357	446111
	649	3.85236	14261	11061	58989	23537	65156	15134	17491	17690	9682	49357	19622	30996	84352	240623	426792	431373	431516	487459	445227	445357	446111
	650	3.85831	12597	9816	59338	25578	64497	12268	16733	15161	9850	48121	19367	29879	84848	236879	426116	429919	435841	486177	440978	445357	446111
	651	3.86425	12009	9054	59724	24853	65548	12105	15749	15810	9281	46094	18769	28760	97579	237202	417901	420360	437240	478693	442952	445357	446111
	652	3.8702	11879	10667	62397	26495	68314	12651	14999	13721	9033	45167	16615	26832	98726	234370	427419	427759	437911	465210	441012	445357	446111
	653	3.87614	12051	9125	63256	24973	69605	12399	13674	12859	9074	46866	15899	25000	101645	243603	434021	425125	438469	467172	430771	445357	446111
	654	3.88209	11645	9312	64093	25651	66511	14012	10950	13718	9008	47746	16725	26710	102301	246629	438430	419833	439442	466115	439994	445357	446111
	655	3.88803	11284	9709	66770	27231	66608	13396	12054	13944	8802	51140	16999	24680	95433	248925	460892	418008	441304	449764	442109	445357	446111
	656	3.89398	13108	9088	68020	27067	69347	14753	9868	12208	10698	48176	17505	23888	90393	248913	481707	427727	441607	461258	443957	445357	446111
	657	3.89992	11672	11149	66746	28686	70405	13761	11387	12100	9072	46414	16435	24451	86558	248671	506676	414971	438305	457864	447937	445357	446111
	658	3.90587	11542	9723	67379	29587	70215	14546	9649	12164	9074	45123	17565	23496	81041	247468	524307	418753	439215	452778	441379	445357	446111
	659	3.91181	12858	11598	71447	29713	68391	14318	9060	14179	8168	43950	17888	23489	78220	252658	533915	414386	438615	450535	443721	445357	446111
	660	3.91776	12143	9575	70188	31053	70872	15269	8899	14328	8336	41956	19470	23215	76694	251550	510811	423334	437343	450194	440314	445357	446111
	661	3.9237	11362	9869	73654	32061	70649	15067	8568	13901	8422	41969	17574	22152	78022	253555	499023	420051	426504	455371	444040	445357	446111
	662	3.92965	12340	11797	74155	33945	70857	17148	9640	15150	8682	38310	21493	25487	78866	251632	479251	419506	439884	451772	435220	445357	446111
	663	3.93559	10352	10222	76038	34473	73934	17904	7587	12817	8262	36967	21554	22800	76966	249206	461708	420918	440432	450957	443342	445357	446111
	664	3.94154	12199	10516	77979	35393	72576	16403	8071	12316	8369	36359	23313	23495	77120	252408	437960	421292	437454	455180	438489	445357	446111
	665	3.94748	10570	10655	78064	35287	76907	16511	8736	13137	8523	37549	24792	22301	76841	247618	434920	412856	438976	452920	443321	445357	446111
	666	3.95343	10053	10828	79052	37204	78763	17373	9302	12336	8913	36328	27648	22536	78921	252008	434758	422426	438715	454266	442388	445357	446111
	667	3.95937	10429	10102	84558	38076	80255	17911	8775	11190	8358	38347	29883	23310	77146	254203	422806	418373	432846	452181	442326	445357	446111
	668	3.96532	10909	10874	82763	39964	78999	18247	7906	11148	7834	41183	33068	22579	77241	254906	428642	423990	424641	451533	442609	445357	446111
	669	3.97126	10954	11423	83171	42060	72255	18144	9461	11264	7726	45776	38254	23557	76415	257623	452359	422019	436707	450135	443877	445357	446111
	670	3.97721	10919	10820	83634	44674	70396	18241	8238	10969	8800	53755	40662	23658	75767	257107	463315	419536	434150	456714	446203	445357	446111
	671	3.98315	10890	11102	85223	43260	67051	21447	8000	11144	7706	61591	44438	22683	77632	254595	477104	415478	436932	458715	440354	445357	446111
	672	3.9891	13023	12577	88321	43767	60975	19189	8597	11867	7398	69240	47088	23752	79632	258061	487230	421262	443559	460845	432446	445357	446111
	673	3.99504	11015	11711	92668	48695	54938	22908	10487	12195	7242	88633	53928	25073	80254	248873	492171	423609	437891	463485	443948	445357	446111
	674	4.00099	9442	11378	93763	46941	51727	20923	9073	11118	7447	106239	56778	23983	79441	261176	488120	424836	433654	464103	445618	445357	446111
	675	4.00693	12948	12635	96152	47252	46699	22993	9009	12470	7830	130100	55682	22774	81616	259571	492815	425363	425699	467403	442243	445357	446111
	676	4.01288	10981	11856	96761	51831	45396	23605	8870	11886	7966	152419	49100	24227	82920	263602	493217	418748	430885	465596	445689	445357	446111
	677	4.01882	12077	13331	99309	51008	43978	24388	9208	11368	7327	168061	45274	25170	83255	256992	496058	412195	437238	474134	433537	445357	446111
	678	4.02477	10277	12473	98214	52872	44184	24820	8569	11552	7696	164702	38131	26499	80337	260212	494715	420263	427148	474444	444841	445357	446111
	679	4.03071	11290	12904	100018	55795	42810	26331	10653	11330	7714	147326	32161	28123	79111	262428	513928	415331	434125	478354	442800	445357	446111
	680	4.03666	9996	14392	105282	56969	43043	26361	10057	13265	7395	118561	30831	36154	79195	257169	517656	413223	424359	478997	432691	445357	446111
	681	4.0426	10170	12809	106509	57900	44930	29024	10542	13255	7590	90336	31007	69085	80262	265125	525648	411826	432714	462085	443907	445357	446111
	682	4.04855	11406	14899	105459	56567	46057	29600	13148	11652	7794	65534	33701	140056	78226	268779	527953	419610	431770	462560	443093	445357	446111
	683	4.05449	10121	14710	109496	61438	44579	32037	12733	11835	7666	45538	39900	241087	77519	265310	522935	418851	437537	458334	446777	445357	446111
	684	4.06044	11226	13407	113411	61281	45379	31772	10023	13331	8494	32845	48152	336922	83207	269774	508858	423812	432082	451552	443479	445357	446111
	685	4.06638	9267	13623	117943	62535	46610	32387	7823	13426	10169	23232	55723	380853	80557	264161	507173	412800	437462	463245	443124	445357	446111
	686	4.07233	9307	16071	118788	63526	45994	35521	6607	13362	10032	20796	63628	382881	78940	263882	506689	427101	429975	451634	433467	445357	446111
	687	4.07827	11535	15927	119847	67760	47513	38188	6554	13568	8605	14977	72571	343304	83751	273309	500816	424713	428018	453442	443918	445357	446111
	688	4.08422	10970	15482	121715	66428	46630	38767	7013	13950	8150	14266	87843	271980	79829	266781	492613	419822	434640	451127	446023	445357	446111
	689	4.09016	11053	15934	123191	69395	48513	41774	7361	14457	8994	15137	111249	186819	85051	271660	483167	411456	435618	459341	447443	445357	446111
	690	4.09611	10218	16593	128111	71199	46325	43275	8864	15218	8727	12993	190728	123547	79878	276796	471694	423402	430033	461436	440166	445357	446111
	691	4.10205	10082	15405	125692	74453	46393	47306	7461	15799	8674	13302	379170	85526	83985	277061	458275	420700	427357	464125	440689	445357	446111
	692	4.108	9973	14915	126060	76615	48806	47955	7586	16410	8443	14569	611503	68820	79964	272406	441958	416062	434717	461050	445048	445357	446111
	693	4.11394	10727	16021	132609	78463	45879	50636	8733	16065	8874	14474	731281	62906	81251	277006	424392	414644	427198	473971	432734	445357	446111
	694	4.11989	9260	18147	133810	81359	46813	52718	8858	18552	8541	14862	646509	64621	81188	279058	425103	425265	436152	477565	444269	445357	446111
	695	4.12583	11200	18045	137781	88266	47153	54576	10442	16749	8602	15569	478982	71685	80841	274820	419555	418547	436712	487451	436551	445357	446111
	696	4.13178	11370	19293	139277	90937	46267	56389	9379	16350	9487	15186	354423	76966	79419	283248	416411	419490	428405	486688	447142	445357	446111
	697	4.13772	10418	19797	141859	95342	46957	57322	10646	16557	9427	15010	284811	85847	83485	280800	412629	412751	438230	484928	441961	445357	446111
	698	4.14367	9322	20127	145131	96726	46003	62955	11989	17155	9548	15980	235875	94227	79924	284960	393907	427405	432269	482360	443503	445357	446111
	699	4.14961	10960	19330	146425	101925	48495	65127	10989	16717	8677	15119	197821	106146	81483	281678	398857	421707	437279	492265	448800	445357	446111
	700	4.15556	11164	19847	147118	112672	46805	69887	11470	18572	9575	13867	175457	109471	82339	278390	406267	423228	433538	489594	444866	445357	446111
	701	4.1615	9152	19250	152611	120590	49052	77062	9712	16305	9748	14069	192604	110251	79912	284425	407890	428015	435579	486749	443316	445357	446111
	702	4.16745	8892	19281	153854	130612	45177	76943	10449	15686	9847	14310	286755	105411	80907	289762	402153	427373	422227	480271	448405	445357	446111
	703	4.17339	10054	21114	154316	134449	47131	84555	10930	15443	11476	15517	490455	94518	81523	289897	398580	420533	434640	486285	445934	445357	446111
	704	4.17934	9664	21052	160502	150929	47226	90130	10132	14326	10026	17552	797757	83113	84925	289285	409296	426273	430624	482669	446501	445357	446111
	705	4.18528	9857	20105	164168	159442	47103	93872	10990	12686	11706	18487	1112600	68466	81925	289375	414601	425662	433728	483048	430083	445357	446111
	706	4.19123	9381	21905	174555	163762	46827	97056	10240	12601	9901	21649	1383359	54388	82019	294126	421191	423982	434240	473485	429753	445357	446111
	707	4.19717	9376	21860	187050	175909	47943	102456	9712	12133	10752	22052	1490479	43948	82677	293864	448359	424729	433585	475367	444922	445357	446111
	708	4.20312	11086	21715	207064	182674	50141	104382	9013	10727	11005	22005	1321333	34835	82984	288339	463596	426988	432754	472551	437711	445357	446111
	709	4.20906	9377	22894	233474	191722	49237	106269	8589	9398	14617	22880	932709	32013	83300	285598	491962	425317	431854	457146	442196	445357	446111
	710	4.21501	10864	24689	273621	198126	50908	108337	8856	9167	14025	19740	545457	29447	82376	288902	512221	422749	437969	466191	443685	445357	446111
	711	4.22095	10359	25256	323834	196034	50543	107730	9896	8223	17247	20621	284061	27619	87844	298496	511899	421673	435888	451846	446950	445357	446111
	712	4.2269	9524	24721	388423	200610	52586	96794	8922	8011	18879	18540	136175	27205	86088	293299	515788	425372	434007	459023	436143	445357	446111
	713	4.23284	9126	26142	462236	206222	53524	62240	7420	7862	20131	15719	78099	29431	86178	293338	487333	423373	434721	468644	447335	445357	446111
	714	4.23879	9233	26480	543601	212985	47799	31028	7675	7601	22266	15310	56812	28098	83852	296131	468728	427697	431849	468721	443585	445357	446111
	715	4.24473	10342	27422	643558	217433	45157	25752	7391	7796	23217	14795	48008	31597	83899	295617	458048	426986	424173	465517	446809	445357	446111
	716	4.25068	8802	26462	760674	223012	43460	26416	8210	7539	22235	17813	45310	30655	86529	296511	441108	425431	435832	465942	438847	445357	446111
	717	4.25662	11164	29290	905818	228647	41472	26722	8328	8552	22463	19656	46103	33535	86461	304520	431762	427948	435831	463919	438319	445357	446111
	718	4.26257	10602	29752	1066131	229953	43240	26589	6379	7456	18047	20160	44411	35905	86035	306088	427104	425856	430806	472705	435168	445357	446111
	719	4.26851	11261	28730	1210066	235645	44206	25738	8219	7470	17942	22993	43132	38670	87752	309147	417045	432216	424632	463859	434502	445357	446111
	720	4.27446	11216	30154	1316716	238607	43534	24956	7270	7595	13637	27231	43895	44631	88761	300821	414381	428462	432967	467600	440925	445357	446111
	721	4.2804	9762	29072	1327744	234649	42731	24018	7074	7457	12706	27174	45706	50823	88745	303332	407365	428003	430304	468659	444055	445357	446111
	722	4.28635	9676	32116	1252074	234084	45150	21791	7244	7139	10663	27848	45065	59710	90535	307605	413667	418530	429680	466030	439400	445357	446111
	723	4.29229	10638	30646	1114832	234944	44657	20153	6953	7245	9621	29464	45146	68824	90141	297985	411202	429516	435642	454148	444452	445357	446111
	724	4.29824	9139	31245	939135	231188	43634	18572	7227	6898	10460	29626	44338	77495	91853	301898	406547	427505	427800	460627	442621	445357	446111
	725	4.30418	9710	31879	792555	225627	45487	17633	7229	6953	8379	25981	45886	86218	93575	299799	406483	423280	433007	465212	437346	445357	446111
	726	4.31013	9436	31405	691091	215318	43018	17907	8920	7952	10531	23082	44251	90747	95537	296472	410253	423111	432814	467582	433624	445357	446111
	727	4.31607	11267	33463	633442	204979	43082	15529	7858	8372	9215	20328	38329	92906	95849	302122	397515	428527	427828	452020	447206	445357	446111
	728	4.32202	9591	34564	603746	191854	46176	16631	8357	6754	11086	18015	39626	89517	95952	304314	408140	420636	435179	462305	441290	445357	446111
	729	4.32796	10478	34147	593824	181547	43598	13594	7714	5731	10556	16340	35887	80804	97809	303242	404340	419220	425427	466220	441800	445357	446111
	730	4.33391	9188	36882	577504	163961	45199	13795	7274	6414	8917	16534	33136	70822	96325	313811	404971	428670	439700	467294	435027	445357	446111
	731	4.33985	10557	39469	571745	142657	48840	13949	7651	8120	10742	15132	30602	58147	93269	306208	404140	419369	430584	467277	445567	445357	446111
	732	4.3458	10478	40721	567188	126931	51026	13538	7474	6634	10137	14071	32228	52533	95354	307775	406778	430340	429918	466756	434362	445357	446111
	733	4.35174	9555	42647	562498	108808	52407	12399	7313	6879	10548	15112	26914	42020	97683	310018	408521	426946	429917	462753	443175	445357	446111
	734	4.35769	9725	40831	561915	96083	52195	13465	8564	7252	11484	14020	28158	33819	104060	309346	409621	429942	439953	462603	442464	445357	446111
	735	4.36363	9360	40577	569527	85774	54095	12274	7759	6287	11233	13863	25532	28644	108194	306319	405013	430640	435971	473975	445439	445357	446111
	736	4.36958	9877	31942	588767	76444	55415	11808	8021	6910	12152	13194	25249	27901	121221	301013	409953	426597	443346	463946	438682	445357	446111
	737	4.37552	10980	20762	595594	67701	56511	11260	8338	7208	12794	13038	26763	27166	121512	308603	412129	428926	439947	464892	442215	445357	446111
	738	4.38147	9370	14142	616102	65626	58419	10974	7898	6391	13312	13153	26596	28282	125545	305980	402125	428254	440096	475269	436313	445357	446111
	739	4.38741	9526	10722	631601	63939	60986	9101	9010	6652	14360	13794	26872	26006	118065	308757	414659	417018	437122	477230	442472	445357	446111
	740	4.39336	10436	8729	652753	61192	60388	6382	8528	8014	13592	13379	27381	26438	111563	313740	407393	434223	439966	477351	443935	445357	446111
	741	4.3993	9126	9342	655097	56693	60369	6042	8938	7813	14543	14171	26166	26408	109615	308166	415453	428794	437215	469849	446598	445357	446111
	742	4.40525	9230	8900	674672	52624	61709	6335	8911	5955	15365	13142	28450	27397	103958	315347	417056	419805	433780	471397	443465	445357	446111
	743	4.41119	9648	9272	691597	49414	64685	5316	9006	8221	17398	13238	27052	25845	99867	328546	417690	422913	438255	465877	446646	445357	446111
	744	4.41714	8589	9586	697223	40841	63505	6033	8815	6434	19106	12773	26200	25371	96936	338874	416493	435027	443552	479726	435738	445357	446111
	745	4.42308	8586	11025	726800	35642	65559	5605	8803	5908	18670	14714	25824	26738	94550	344012	417771	422088	437619	473191	445886	445357	446111
	746	4.42903	8903	9416	742612	29036	70015	6880	10133	6467	20867	13438	27831	26520	98533	352587	415389	427578	438020	477383	447854	445357	446111
	747	4.43497	8818	10169	760249	23179	72758	6060	9485	6187	21360	14690	24972	26407	95540	366995	424118	422482	429741	477363	448185	445357	446111
	748	4.44092	8698	9678	785863	19338	72159	5722	8997	6051	22021	15825	24409	26649	98832	363485	421044	435970	437505	478219	447398	445357	446111
	749	4.44686	8490	11812	808509	18260	72546	7151	9891	6114	21513	17480	25109	27457	96088	357920	420649	435466	438995	476332	442933	445357	446111
	750	4.45281	8915	11469	824954	18585	73906	6055	9831	6973	18308	18334	26292	26007	97864	354696	419553	431427	438634	473788	442300	445357	446111
	751	4.45875	8617	9806	840738	14605	74049	5815	10573	5918	16933	20603	25035	25484	97227	354363	432613	423624	441613	476501	441932	445357	446111
	752	4.4647	7569	11387	851581	16311	76100	6185	12168	6331	13684	20783	26239	26249	97266	362220	419088	431690	443668	470360	444184	445357	446111
	753	4.47064	9548	11493	861808	15142	75014	6267	11713	5456	11930	19039	27594	27673	98644	361879	429688	431370	442294	468725	447958	445357	446111
	754	4.47659	8663	12109	863012	16677	79880	6194	9981	5976	12735	20163	29939	26156	101891	361868	428353	432359	443379	456352	437779	445357	446111
	755	4.48253	7831	11603	872231	15048	81169	6068	10777	6970	12097	16838	29192	28477	100127	357892	418221	429025	443855	462061	438007	445357	446111
	756	4.48848	10264	11103	898515	15270	81576	6357	10299	5403	9330	15178	29821	29935	104154	345613	429845	417885	426406	464579	447935	445357	446111
	757	4.49442	9927	11196	912595	17010	83843	5636	10242	5799	9241	13891	31599	28371	100025	343804	426714	429423	433690	460676	444163	445357	446111
	758	4.50037	8494	11352	923188	15175	85359	5925	10518	6152	8570	14410	33418	28302	100314	326925	422182	430151	438464	450990	437507	445357	446111
	759	4.50631	8164	11489	940052	15206	84539	5776	10888	6011	10731	13264	35081	28914	98660	328785	417772	426316	436551	456125	447703	445357	446111
	760	4.51226	9538	13250	942732	15731	87796	5712	11593	6570	8537	14011	39394	29311	101892	315345	409944	420638	441392	455029	433445	445357	446111
	761	4.5182	8287	11092	942999	16766	86007	5716	11264	7811	8639	12488	45570	29405	103872	323190	417127	415678	437695	444838	445101	445357	446111
	762	4.52415	8611	13331	957245	12488	87770	6151	12067	7150	7765	12364	46944	28893	104068	317587	412614	418784	439575	459093	447750	445357	446111
	763	4.53009	8351	13473	947004	10179	93850	5789	12149	6781	6927	12187	50790	27528	101394	312441	404579	415111	439433	461191	437676	445357	446111
	764	4.53604	8265	12792	952837	9784	91564	5329	14109	7073	8060	12882	52592	27945	99362	319461	409987	417329	442706	453129	446499	445357	446111
	765	4.54198	10973	11138	951988	8216	94196	5008	12569	6568	7096	12495	56073	28533	101250	320793	407586	424350	429137	459507	441621	445357	446111
	766	4.54793	8839	10672	962027	8857	95958	5535	13007	7651	7084	14452	58334	29563	105013	315265	408750	425815	438352	472279	443563	445357	446111
	767	4.55387	8846	10215	982380	9270	96812	5403	13591	6655	6847	12325	54277	28127	105943	318101	403701	427668	442416	462994	443061	445357	446111
	768	4.55982	8631	10762	980940	8264	97230	5528	13070	6084	8309	13019	52145	30884	101878	314309	409568	428286	437639	476280	436379	445357	446111
	769	4.56576	8549	10933	1005618	8486	100648	5203	14204	6350	6867	12680	44732	27865	100443	320320	405617	425812	440177	480990	445029	445357	446111
	770	4.57171	8476	11953	1008059	8918	101301	5163	14194	6436	6465	12524	37633	30342	103962	315948	408807	417935	431452	485132	447209	445357	446111
	771	4.57765	8897	11368	1023993	10130	103639	5469	14289	7361	8391	12740	28438	29632	105296	311462	407257	418668	442441	479345	441273	445357	446111
	772	4.5836	7700	12811	1008444	9381	105539	5000	13865	7516	6511	12893	26095	28523	102788	316432	407020	420933	428984	472174	448773	445357	446111
	773	4.58954	9829	12395	1016678	8626	107679	5786	14599	6162	6139	14239	24517	29135	105679	322677	399120	425817	441936	471157	440559	445357	446111
	774	4.59549	10015	11821	1017236	9975	104336	5637	14961	6523	6019	11980	25364	29212	102459	318051	407152	418654	445338	469363	433861	445357	446111
	775	4.60143	8907	12088	1008531	9980	108493	7152	15033	6224	6236	12642	26024	29566	102581	323449	408901	417308	447026	467117	441718	445357	446111
	776	4.60738	9034	13918	1023555	11009	109560	5988	14924	6116	7528	12753	25194	32175	100953	317407	405243	428489	446171	466522	436919	445357	446111
	777	4.61332	10026	12261	1039383	10502	111786	6023	15936	6141	5512	14426	24927	30487	104002	323953	406470	428615	455891	462290	437019	445357	446111
	778	4.61927	8708	11825	1048571	11964	112454	5675	15351	5768	5182	13142	24256	30925	104098	317372	394997	430915	458535	456806	446579	445357	446111
	779	4.62521	10488	14489	1061010	12923	117908	5863	14726	5776	6067	14055	26157	31468	103761	323791	407448	425658	456888	454463	448728	445357	446111
	780	4.63116	8563	13177	1070069	15311	121152	6973	14821	5463	6028	13314	27557	31158	103075	323939	409851	429961	468297	458531	435310	445357	446111
	781	4.6371	9304	15793	1067387	19676	119003	6118	13886	6180	7692	13436	26074	33496	104905	329037	409234	430150	466361	454920	437086	445357	446111
	782	4.64305	8559	15510	1062227	23670	121211	6650	14025	6220	6164	13645	24662	32411	104319	324596	413364	426377	469222	448388	439907	445357	446111
	783	4.64899	9187	14128	1056108	33054	125640	5132	16053	6395	7149	14030	26462	30408	104202	322760	411660	424979	457570	444611	434539	445357	446111
	784	4.65494	8504	14011	1031893	44439	125735	4875	13298	8358	7618	13792	26899	30353	108729	321460	401323	430200	463363	449047	447282	445357	446111
	785	4.66088	9078	14840	1001303	57351	124414	5118	12174	9384	9373	14159	26499	29438	101595	328695	412663	427045	458300	440137	446965	445357	446111
	786	4.66683	9350	14828	969924	77984	126728	4625	11167	10589	13766	16262	28477	28499	102535	323235	411416	423224	452288	454775	446570	445357	446111
	787	4.67277	8661	14515	934575	88774	129791	4182	11599	13136	13528	18381	28775	31450	106345	324008	410317	412876	442723	456798	447196	445357	446111
	788	4.67872	10703	15651	874111	103947	130837	4212	8653	15405	15427	19798	30592	29867	105362	319659	414768	427423	450040	445527	447166	445357	446111
	789	4.68466	10611	16867	779998	114740	129723	4006	9480	20694	16600	25216	29320	30281	105972	319630	415139	424649	445638	451387	435549	445357	446111
	790	4.69061	10135	17049	681099	118211	130858	3899	7319	20801	18033	30115	29025	29948	104169	326875	412865	426399	436476	455022	443705	445357	446111
	791	4.69655	9896	17769	583059	121422	128325	4007	6366	22860	19777	35398	32416	31208	106219	321254	416970	425428	440537	458740	446536	445357	446111
	792	4.7025	9469	17798	479302	125276	122880	4002	6378	23765	16005	41917	28880	30875	108400	330730	429658	428219	434830	462851	443347	445357	446111
	793	4.70844	9690	19062	394997	128493	117078	3278	6263	25551	16322	45989	27389	32039	109373	330520	429687	427688	442564	476838	446111	445357	446111
	794	4.71439	9013	22629	325721	128200	109966	4260	6105	27231	12300	44916	27381	34378	105072	322243	432495	428920	438773	482071	439551	445357	446111
	795	4.72033	9347	25592	275714	126873	98001	3789	6064	28352	11400	41407	26397	30565	108234	318030	449014	432622	442832	489639	444355	445357	446111
	796	4.72628	9060	27785	242436	128755	85992	4196	7711	29819	11614	36403	25969	32908	107996	332646	449624	427668	435401	489616	442021	445357	446111
	797	4.73222	10364	30405	219660	128656	74513	4047	5840	31160	10066	28632	26021	33587	106093	336838	447551	426857	444217	490233	445538	445357	446111
	798	4.73817	9422	28693	210075	130633	66526	4188	5683	31040	8976	23432	25709	30856	105305	335721	445356	422185	454498	487482	445231	445357	446111
	799	4.74411	9476	28038	204239	130887	54392	3856	7912	30454	9109	21110	28123	30996	109273	350589	437286	428752	438992	484851	445006	445357	446111
	800	4.75006	8774	25234	195382	131057	48985	3887	6136	31555	8048	16175	25415	32774	107720	350196	438784	422904	443786	482108	445374	445357	446111
	801	4.756	9670	22933	198062	130025	45700	4100	6044	33130	8007	13022	27116	32540	105744	348156	426843	428324	452072	475973	443726	445357	446111
	802	4.76195	9290	19647	199463	133650	39636	3980	6850	32400	7876	11935	28298	28791	111192	347773	430882	422055	454109	473522	438633	445357	446111
	803	4.76789	9316	19495	195154	133994	38264	4267	6679	34031	7708	10534	27747	31707	107702	343740	421779	424405	454462	475336	445235	445357	446111
	804	4.77384	11159	19575	195917	134083	35165	4234	6087	34960	7996	10840	26441	29632	107801	343262	431424	430266	451671	471555	451537	445357	446111
	805	4.77978	9736	18492	192014	129376	34115	3791	6394	36488	7499	11567	27526	30369	111472	340550	417725	429483	440665	469551	437498	445357	446111
	806	4.78573	10580	20194	178850	129951	33161	4238	6816	35510	7962	10179	27352	30035	115246	333957	419464	421231	447369	461993	447273	445357	446111
	807	4.79167	10761	20313	167232	128032	35386	4702	6854	36508	7883	10841	27620	32626	112238	331497	421118	433581	439287	464528	436460	445357	446111
	808	4.79762	10883	18594	147686	132710	32977	4622	6377	30361	8290	9866	30740	29849	113558	333722	417035	427377	449213	466883	444995	445357	446111
	809	4.80356	11697	20415	123022	126601	35099	4372	6834	27186	8379	12383	30341	33179	111205	342395	415949	428751	449427	464313	445557	445357	446111
	810	4.80951	9717	19765	95104	125541	33104	4851	7797	22748	8829	9482	29734	29928	114325	331869	410887	428038	449666	457233	445842	445357	446111
	811	4.81545	11103	19945	68314	128466	36643	4953	6958	19722	8834	9324	32419	31911	112159	334548	415710	418274	453033	464225	449725	445357	446111
	812	4.8214	10624	21787	49612	128453	35618	4698	6818	15844	9343	9341	33952	33047	110785	338192	414340	428501	439123	455388	436066	445357	446111
	813	4.82734	12247	21891	33728	124941	33666	4889	7143	15246	9405	10097	34653	29404	114171	350178	413292	419203	457913	465384	443846	445357	446111
	814	4.83329	10581	22250	25725	128188	35687	4874	6479	13153	10840	9875	35465	31078	111760	349642	410140	420942	448370	459080	440119	445357	446111
	815	4.83923	10972	21419	19049	128684	34911	5935	6262	11602	11989	9498	32634	31056	114156	342812	409591	429292	450900	463368	446247	445357	446111
	816	4.84518	11144	21159	17077	132884	33964	4640	6604	11825	12612	9802	34640	31799	115177	346477	404998	428672	469522	461940	445520	445357	446111
	817	4.85112	12024	21068	15857	134111	35204	4324	6813	11084	12814	9748	34206	31087	114488	342972	406632	424267	472326	464600	447931	445357	446111
	818	4.85707	12472	23421	14978	139467	33789	4256	6495	12771	14517	9587	32666	30727	117122	339284	398005	424890	479377	453728	444973	445357	446111
	819	4.86301	12418	22774	16307	138762	36477	3992	8380	10694	15826	11520	34334	30832	119194	337698	406966	426929	480597	460721	445870	445357	446111
	820	4.86896	11717	22501	15105	137676	35587	3989	6323	10141	17134	11740	34032	33548	123974	339864	407820	426643	485575	456890	442547	445357	446111
	821	4.8749	11407	23899	14713	140946	35395	4183	6303	10292	18797	10484	33883	32206	118936	326135	408456	430081	483030	455907	447592	445357	446111
	822	4.88085	13100	22155	15593	140889	35270	4355	6518	10317	20649	11782	34955	33032	121774	335837	410665	429974	487555	455124	444317	445357	446111
	823	4.88679	11271	22476	14025	137139	36453	4332	6818	9675	19245	10524	35211	33299	126899	338245	410426	427774	479672	455789	447844	445357	446111
	824	4.89274	13410	24228	16037	135885	38315	4314	6678	9647	20923	9987	35772	33098	120969	336308	404380	422650	474307	459599	436281	445357	446111
	825	4.89868	12202	24808	14996	135582	38748	5294	6912	9573	20305	11128	32701	36293	129472	340454	416020	430336	469958	452274	431364	445357	446111
	826	4.90463	11828	24242	14785	133399	36425	5642	6220	10002	20437	10273	34175	32980	124711	337340	414435	428210	469336	457114	438996	445357	446111
	827	4.91057	12860	23296	15946	127554	40469	4302	5910	9446	19464	10749	32488	32571	124234	338921	414404	423554	456728	455565	450900	445357	446111
	828	4.91652	14048	24719	19915	128932	40023	4023	6158	10656	17273	10834	31788	35615	123167	339359	411650	423557	450447	458463	436338	445357	446111
	829	4.92246	14083	24607	26975	126998	39213	3616	6147	9144	12308	10568	31188	34445	121584	342290	415707	421112	455241	457965	451638	445357	446111
	830	4.92841	12389	25462	39078	125963	39085	4280	6327	10399	11115	11359	30328	32522	125944	335242	412240	425317	450598	464615	440397	445357	446111
	831	4.93435	13649	25109	52454	127889	38434	3694	5831	10057	9210	10728	29759	32962	119947	333772	411566	424249	446107	445939	441374	445357	446111
	832	4.9403	12657	26552	69134	126228	39015	3536	5822	9186	8653	10747	28949	33157	118657	334484	410407	427354	448892	455380	448202	445357	446111
	833	4.94624	13812	26211	83555	125627	37689	4205	5786	8889	8265	10894	27368	33433	120415	334099	415623	424899	438041	454063	449489	445357	446111
	834	4.95219	14170	26955	92338	126808	35488	4367	5660	10588	8503	11272	26521	35883	125955	331902	414215	426450	440487	446904	441912	445357	446111
	835	4.95813	13411	25600	88207	126290	37574	3507	5998	9235	10490	11578	26180	33151	122901	331257	413152	416760	447311	457026	444851	445357	446111
	836	4.96408	13799	27091	81323	125102	37879	3442	5640	11433	10731	12088	26400	33367	124548	337157	409896	424766	446599	459922	437015	445357	446111
	837	4.97002	12027	27215	67692	125889	42037	5435	5877	8208	10931	12169	26605	33104	118850	340910	410316	414230	452103	456684	451277	445357	446111
	838	4.97597	11235	28024	52791	128208	49312	3814	6054	8364	15654	13561	26323	33187	124920	343525	401093	423704	452747	451495	438113	445357	446111
	839	4.98191	12058	29354	42837	130217	61441	3723	6289	8759	25080	12961	26292	35607	121471	340887	404466	425333	460709	449215	443701	445357	446111
	840	4.98786	11907	28263	33910	129823	81654	5321	6321	8225	38672	11447	27093	33166	124943	335898	409771	424009	457602	453844	447176	445357	446111
	841	4.9938	11845	31035	30989	127604	93384	3475	6092	8395	62884	11620	26156	33477	123928	335965	405339	430526	472389	451794	451528	445357	446111

## Sheet: HC 1.25 min
			The raw data obtained from 4 runs (shown in different colors) for the overall comprehensive analysis using 1.25 min H/C window
		0.625	1st run	2nd run	3rd run	4th run	1st run	2nd run	3rd run	4th run	1st run	2nd run	3rd run	4th run	1st run	2nd run	3rd run	4th run	1st run	2nd run	3rd run	4th run	1st run	2nd run	3rd run	4th run	1st run	2nd run	3rd run	4th run	1st run	2nd run	3rd run	4th run	1st run	2nd run	3rd run	4th run	1st run	2nd run	3rd run	4th run	1st run
	1tR cut	from	8.5	9.75	11	12.25	13.5	14.75	16	17.25	18.5	19.75	21	22.25	23.5	24.75	26	27.25	28.5	29.75	31	32.25	33.5	34.75	36	37.25	38.5	39.75	41	42.25	43.5	44.75	46	47.25	48.5	49.75	51	52.25	53.5	54.75	56	57.25	58.5
		to	9.75	11	12.25	13.5	14.75	16	17.25	18.5	19.75	21	22.25	23.5	24.75	26	27.25	28.5	29.75	31	32.25	33.5	34.75	36	37.25	38.5	39.75	41	42.25	43.5	44.75	46	47.25	48.5	49.75	51	52.25	53.5	54.75	56	57.25	58.5	59.75
		1tR min	9.125	10.375	11.625	12.875	14.125	15.375	16.625	17.875	19.125	20.375	21.625	22.875	24.125	25.375	26.625	27.875	29.125	30.375	31.625	32.875	34.125	35.375	36.625	37.875	39.125	40.375	41.625	42.875	44.125	45.375	46.625	47.875	49.125	50.375	51.625	52.875	54.125	55.375	56.625	57.875	59.125
		2tR min
	1	0	3380	22822	2287	204042	4088	3303	5068	9047	471355	2859	3151	4772	3462	4631	2945	3278	2933	3998	4806	4128	5283	6758	7906	9628	22071	13932	22928	39814	80681	148700	256200	345594	389801	405056	367600	413596	425472	428087	406242	425353	422160
	2	0.0059453	3122	21295	2827	203594	3485	4572	4924	7712	415360	3043	3223	3129	3383	3427	2865	4439	3064	3616	5199	4089	5340	6772	7873	9559	20944	14861	19674	40142	79293	153558	258588	349613	391097	393277	370064	414234	425392	432804	404861	430375	431471
	3	0.0118903	4357	21358	2819	198018	4761	4702	4975	9311	325540	3480	4055	5043	4640	5128	3800	3332	3334	5161	4853	3662	5782	6294	7848	8864	22436	15395	20526	40433	75331	152342	257099	349189	390058	407508	367899	406332	430093	429589	406475	423236	426361
	4	0.0178353	2753	21198	2432	191897	4934	4217	7044	10103	231576	4543	3829	3583	3189	3218	2320	3440	2892	3566	4772	3763	6221	6586	8064	8924	21296	15917	19982	40962	77419	152696	256871	341532	380426	404132	366267	417070	425206	429170	412850	427981	429297
	5	0.0237803	4298	19927	3499	196791	3158	3683	5952	8456	152495	3027	2436	3295	3032	3714	3924	5374	3263	4084	4834	4051	5919	6443	8048	9241	21287	15098	20554	41106	78311	154525	259626	348268	385591	394619	367888	414114	425706	433463	408592	423933	434972
	6	0.0297253	2987	20774	2588	189691	3956	3153	7138	9700	109832	2958	2838	4685	4500	5188	2765	3539	3017	3720	4854	5599	7960	6187	8154	8850	22349	15452	19552	40418	80041	153020	264011	346345	390500	403813	365522	412167	426946	420347	417100	425511	430561
	7	0.0356703	4855	19364	2876	183666	5268	3916	6041	9475	85163	2954	2598	5265	3446	4184	3015	3191	3865	3861	4846	3822	7665	5673	9375	8593	21382	14731	23221	40051	78224	147539	264158	339070	386157	404934	357217	404643	424844	417527	415707	426342	434076
	8	0.0416153	4347	18669	2829	185522	3844	3811	7009	8998	69395	2754	2480	3594	3105	3832	3039	3212	4892	3775	6105	5895	10086	5817	7864	8840	20741	15490	23562	40501	75180	151728	255624	347387	392490	392033	369079	413223	425105	431101	415041	423195	427425
	9	0.0475603	2783	18147	2370	186824	3843	4577	8503	9440	51822	3110	2495	3523	3429	3204	3816	4537	4372	5363	4333	3615	11726	6071	8463	8339	22952	15039	23279	41304	76186	146291	262887	346549	383244	398226	360173	414387	426945	433102	412864	428154	433272
	10	0.0535053	3283	18460	2543	181118	4131	5128	7896	9027	37213	2849	3702	3918	3674	3545	2456	3135	3079	3960	4814	4052	15882	6098	9183	8384	20517	15122	20476	44470	77745	148424	258746	349958	389606	400572	358857	414779	426880	430407	411226	419758	436011
	11	0.0594503	3381	17351	2889	176297	4709	4548	6678	9130	27073	3191	4132	3643	4444	3105	2998	3755	3289	4081	4890	5147	16620	5941	11667	8814	21066	14714	21570	42141	77450	152445	259656	348783	391874	401739	365678	413366	430884	420853	413550	420979	433882
	12	0.0653953	4509	16801	4056	176732	4075	4590	7062	10444	18380	2988	2535	3592	3378	2795	3134	4976	3131	3765	5055	3979	17807	8042	10670	8173	21420	15896	20308	42518	78253	155644	264731	341476	393334	401487	368024	403377	425576	417506	415881	415100	437215
	13	0.0713403	3172	16629	3757	173407	4211	4087	7396	11113	13813	3190	2660	3376	3680	3342	3277	3191	3165	3669	4795	3848	18699	5979	12171	7988	22438	15537	20918	41026	79023	148977	258842	349175	389678	402721	359737	410259	428502	421028	410281	429767	438052
	14	0.0772853	3120	15659	2770	172165	3809	5639	7810	10347	10537	2993	3788	3543	3255	3250	4052	3581	4534	4272	4665	4051	17806	5730	13776	8699	20479	16271	21411	41282	78533	152191	268691	352496	381992	398966	360825	406034	427886	424954	413802	419278	435496
	15	0.0832303	4049	15316	2484	171033	3604	5532	9260	10122	9476	3397	2318	3678	3252	4290	2551	3531	3077	4186	6222	4056	15554	5696	16552	8303	20383	15981	21411	42959	79783	155584	265480	342289	392156	403608	365214	405371	428026	436980	404992	429383	433042
	16	0.0891753	4268	14330	3130	167652	3786	4570	7964	9569	10911	3006	2526	3281	3477	2916	4448	3294	3035	3803	5950	4069	13492	6295	17056	8522	20330	15736	21681	40323	79244	151200	261149	346543	390441	399207	367504	401591	419523	434026	408387	429367	436523
	17	0.0951203	3118	14668	2829	159722	3837	4504	7625	10829	10694	3488	2268	3408	3120	4374	2855	3142	2799	3671	6059	4034	10473	7952	17184	8383	20997	15502	20198	41729	82952	152029	263948	347577	382289	398376	363265	407485	414809	421540	412296	429708	426714
	18	0.101065	3140	14332	3158	162985	3906	4483	7708	10718	7695	2995	2842	3492	3393	3461	4179	3599	2466	3862	4653	3551	8904	5676	15992	7856	20095	16770	21055	44350	85585	161220	261581	351269	391878	398586	362620	404546	421028	419498	404287	427158	431644
	19	0.10701	3131	12920	4099	157171	3323	4371	8722	10565	7662	3064	2269	3432	4656	3695	3060	3404	3143	3562	4744	4045	7077	5816	14587	10304	19422	15339	21941	44705	81790	159176	269634	346821	385343	399885	360098	412900	424124	429168	409218	429983	422616
	20	0.112955	2922	13278	3914	155919	4025	4537	8295	12113	7251	3302	2329	3191	3619	3167	3081	3458	2985	4766	6424	4090	6472	5409	14242	7703	19680	15999	21187	42866	84428	162288	271067	346961	391418	391061	365787	413297	427713	433369	404222	436736	436357
	21	0.1189	4427	12482	2514	155193	3631	3740	9248	11173	7467	3054	3761	3260	3385	3218	3162	3482	2911	3916	4608	3834	4971	7119	11112	7603	19502	17904	21998	41975	84964	161368	265266	343944	379653	402811	367860	409391	423222	425597	395783	427798	425474
	22	0.124845	3372	11693	3784	151027	3157	3487	8920	11087	7176	2990	2653	3618	3410	4578	3144	3458	3290	3846	4528	4238	4647	7273	10141	8146	20639	17420	22539	44747	86880	156266	271370	349473	390570	401852	367026	409260	427495	430051	398595	431077	421957
	23	0.13079	3189	11791	2770	149624	3798	3445	9120	12248	7497	4546	2513	3011	3774	4764	3903	3504	4292	3622	4536	4210	3974	5413	10648	8241	20635	15346	22294	45510	83058	156458	264257	350465	386643	393923	367423	405292	425072	426399	393156	427965	436180
	24	0.136735	2733	9447	2377	147783	3476	4771	10255	13440	9087	2668	2631	3120	3388	3527	3947	3007	4781	3507	5091	4102	4520	5859	8955	7794	19414	15963	22910	42092	85545	162528	267437	339058	390874	399681	360865	408053	428001	430274	397944	431492	435500
	25	0.14268	2968	11158	2503	146024	3688	3167	9058	11597	7289	3123	3633	3179	3395	3169	2870	2980	4398	3897	4738	5818	4515	5998	8569	7935	19733	15633	23329	44414	87544	160492	267798	343194	388809	403804	366769	399905	428330	430489	386857	433395	429621
	26	0.148625	3188	10874	2593	141150	3441	3261	10309	12864	7473	3685	2507	3590	5142	3212	2957	3409	2982	4146	5331	3876	4411	7487	8547	7453	20238	16092	24448	44367	87159	165998	265263	350734	389945	398091	359816	412012	429253	434023	399703	427191	424494
	27	0.15457	3743	10580	2423	140853	5077	3359	8305	12205	7557	4349	2786	3720	3561	3076	4193	3011	3258	4021	4989	4237	5043	5783	8718	7561	20627	15424	23010	46913	85361	163803	266204	344324	383367	390526	369055	410042	426496	428213	396630	425173	430990
	28	0.160515	3183	10053	3516	133365	3552	3380	8742	12504	7025	2772	2399	4220	3353	3458	2971	3437	3235	3882	4615	3849	4770	6077	8483	9967	20788	16168	20894	45342	83653	165852	268785	345743	389056	400703	360901	418783	418951	427243	399771	430379	433691
	29	0.16646	2897	10168	3642	133923	4657	3322	7277	12764	6675	3641	3648	4522	3210	3503	3478	3506	4171	3473	5059	3636	4824	5589	8689	9305	20565	15488	21491	43620	87251	168643	268993	349863	393009	392565	367021	411859	425321	426327	399905	430405	435584
	30	0.172405	2728	7069	2472	131164	3990	3001	5745	13035	7586	3320	2687	3316	3321	3294	2764	3581	3015	3920	4800	4054	4421	6055	8837	7800	20220	16463	21220	43675	86077	163382	263730	346056	384019	391907	370952	408176	424010	429958	398155	431172	436819
	31	0.17835	2712	8779	2286	130213	3570	3231	4582	13053	6963	3111	2510	3254	3136	4916	3182	3042	2986	4008	4668	5687	4883	5804	9580	8424	20982	16509	21418	43705	85740	166396	261564	349290	383872	399110	368183	411152	423453	430717	398903	421798	434126
	32	0.184295	3987	9019	2852	122177	4674	3181	4548	12932	8863	2755	2653	3398	3232	3679	3091	3324	2919	4166	4196	3870	4697	5413	8128	8285	19787	15649	22792	45251	84312	170136	263684	340062	390991	392929	361853	412547	423906	429628	405894	420731	435895
	33	0.19024	4107	7002	3265	122221	4893	3078	4071	13287	6659	3075	2556	3335	4608	3517	3499	2939	3288	4156	4581	3786	4109	7360	8576	8274	19885	15862	21512	43786	85123	169582	271999	352187	392993	401379	365808	416256	424369	429625	412348	429058	433295
	34	0.196185	2876	7702	2326	121512	5197	3095	4440	13900	7007	2906	2472	4473	3640	3276	3490	3387	3214	3373	4777	3848	4492	5510	8152	8581	20151	17750	21677	43763	84535	163485	266385	345330	383529	390469	365850	416010	423230	430693	408746	423755	436373
	35	0.20213	4509	5405	3922	119437	3514	3189	4752	13826	8558	2655	2515	3145	3204	3126	3126	4866	2918	4051	4945	3790	4968	5832	8218	7896	21009	16217	24236	43375	83772	172517	266825	351021	384698	401843	356628	416922	419895	432120	410120	433695	438286
	36	0.208075	3446	5515	2463	116710	5344	4392	3967	14699	6116	3320	3572	4468	3011	3436	3195	3223	3233	4047	4890	3329	4423	5384	8468	11288	22082	15602	23131	44513	84726	168782	273172	342280	387185	404348	366972	410023	426463	429472	415859	429988	426989
	37	0.21402	3465	7695	3747	110722	3489	3964	4281	14593	6342	3059	2589	3260	3291	3323	4080	2911	4413	5267	5949	3911	3944	5319	8265	11647	19421	15413	22458	43778	82790	165289	273531	347058	389862	400904	365095	409624	424777	433367	408573	430932	425746
	38	0.219965	3635	7091	2785	109304	3620	3298	4068	15032	6848	4493	2559	3266	2974	3257	3058	3286	3395	6736	5690	3691	4441	7424	8303	22912	19881	15578	22513	46231	88929	170356	269230	352634	390156	398765	366985	404014	425482	422344	402571	432979	433097
	39	0.22591	3974	7056	2465	107006	4991	3565	4341	15437	6653	3072	2723	3242	3175	3834	3219	2933	3426	9528	5759	3521	4209	5130	7640	55810	21209	15421	24527	46404	82891	169895	276267	353335	386560	401998	364596	417252	428513	428445	410284	430397	435832
	40	0.231855	3026	5575	2459	107397	3527	3465	4481	15422	6634	2959	3002	3158	3113	3686	2672	3252	3412	11970	4280	3804	5585	6404	7715	118508	19661	15706	22437	45520	89179	163197	267642	355235	388143	400732	355564	418167	429600	427619	408599	434794	437772
	41	0.2378	2975	7116	2504	102400	4074	4732	4077	15985	8331	3506	4428	3173	2951	3856	3813	3500	3127	14752	4188	3882	4388	6223	8459	230066	19739	15227	22848	47438	86409	166736	273063	353031	387395	403657	359906	412831	414968	429288	400823	423556	430751
	42	0.243745	2982	4749	2331	99831	3670	3194	4604	16448	6954	4368	3793	2885	2889	3324	3094	3255	4591	17220	5239	3750	4023	7463	8221	391730	19540	15418	24796	46275	84453	166161	265923	349056	390977	403836	366777	416908	426258	429270	398353	429148	428602
	43	0.24969	2927	4824	2642	102379	3671	3495	5727	16930	6919	2987	6674	3336	2906	4733	3061	3284	4399	20154	4299	3881	4182	9974	8165	597879	19261	14865	25379	46009	85946	171921	269522	349153	387773	402144	366041	403429	424999	433774	397173	420974	438881
	44	0.255635	3396	5948	3104	101232	3881	3592	4046	16520	6945	3040	7849	3199	3125	4320	2998	3216	3450	21735	4189	3618	4529	11273	8124	791581	21838	15759	22282	44816	86690	172194	273644	351976	387883	403001	365794	410810	423732	432608	393657	427030	434364
	45	0.26158	3064	5659	2646	96760	4035	4525	4401	17453	6951	4044	11845	2904	2964	3286	2686	4888	3082	22431	4366	3954	3832	15135	8188	996221	19498	15695	25055	46507	87652	170966	275376	352681	390512	404391	365908	418511	422982	421873	385693	429140	437514
	46	0.267525	3227	5586	3567	96618	3537	3445	4265	17422	7082	2566	19236	2978	4635	2907	3001	3669	3031	25060	4295	4063	4426	17300	8562	1161224	19414	17889	23134	45414	88828	174732	272032	353137	392052	401406	364257	405367	421376	434325	388744	431192	434175
	47	0.27347	3062	5542	4056	94213	3672	4609	4229	16365	7257	2776	28732	2989	2744	3581	3103	3137	4453	25345	4321	5142	4339	16970	9590	1255742	20185	14976	22338	45022	88909	173352	273689	353828	381141	401947	364045	402658	426291	428531	389607	429965	432510
	48	0.279415	4277	4369	2509	92576	3445	3444	5750	18121	6777	3144	41368	4514	2840	3447	3011	3478	3250	27252	4167	3566	4608	17437	9510	1292092	19940	16298	23095	46671	84834	169252	275892	357164	395898	394875	362138	411635	422873	421105	391393	428655	430749
	49	0.28536	3232	6006	3255	89727	3553	4735	4446	17764	6841	3048	51268	3324	2876	3575	2763	3186	3300	27080	3993	3959	4746	16586	9597	1179207	19627	16024	22000	44975	87123	166538	269045	356808	380456	402514	361814	417381	418502	429727	393407	423017	435516
	50	0.291305	4287	4183	3780	84876	4607	3668	4126	17229	6934	2824	62185	4759	3373	3269	3088	3286	3277	29375	4017	3892	4538	14149	7440	983386	18751	16262	23371	47583	86989	174479	273730	351510	385114	395730	364462	414025	422498	428886	383695	419778	438472
	51	0.29725	2869	3950	3508	87234	3714	3163	4397	20266	6321	2573	74023	3126	3002	3285	2596	3012	3072	30030	5040	3184	6095	13429	8357	726011	18976	15274	22899	45554	91325	174117	276927	358046	391686	403905	364825	400535	416778	433187	392953	424081	434975
	52	0.303195	4194	4796	3890	84026	3620	4787	4220	18713	7574	2851	79777	3082	3163	3249	4581	3298	3487	30004	4644	3426	5748	12161	8556	458890	19076	17599	22585	45982	87169	180346	278609	357431	386721	395593	363356	411568	429867	428690	386594	431924	433853
	53	0.30914	3955	3561	2573	83026	4855	4343	4207	18581	6642	2776	86093	3067	2779	4868	2721	3677	3268	32290	4931	3551	4585	11045	8085	250675	20576	16173	23741	46932	89859	177283	270103	352207	382728	404133	358503	409502	420456	428124	398794	420123	430072
	54	0.315085	4249	3656	3547	76047	3795	3094	4279	19125	6676	2939	90682	4097	2760	5056	2899	3529	3010	32912	7849	3360	4714	10095	8190	134878	19466	15405	25554	45970	92571	177213	272397	353704	384598	399714	364044	410300	423788	432104	395838	420865	432219
	55	0.32103	4022	3907	2366	73904	3675	3265	4185	20167	6352	4150	93091	2818	3030	4162	2752	3620	3010	34739	8466	3380	4962	9704	9035	68091	19944	17295	23715	49366	88901	178972	270804	360622	397032	404097	367394	405419	423337	431956	399334	428908	425010
	56	0.326975	2881	3456	3868	77759	5019	3539	3870	20528	7104	2743	91782	3073	2816	4650	4042	3774	3248	32965	10196	3287	4742	9462	8169	38839	19999	16045	24937	47833	90041	179541	277321	354364	394446	400770	363726	404292	424668	431346	401732	428734	426473
	57	0.33292	2414	3129	2491	75472	4839	3314	4275	21557	6266	2994	91532	3086	3031	6538	3109	3384	3221	33202	12520	3518	4722	8553	8068	27378	19590	16401	24645	47111	89457	182398	267344	351072	395477	405005	367545	417875	428655	419485	412360	418224	434139
	58	0.338865	2857	3528	2818	72114	3491	4111	4303	23221	8166	2925	94878	4475	4133	5720	3386	3811	3349	37089	15013	3150	5736	7549	8005	20578	19472	16061	25856	47647	93813	181802	268881	360133	387559	405447	368527	408020	426737	428510	414608	417887	434758
	59	0.34481	3755	3523	3906	71999	3287	3368	5465	21412	6485	2711	93456	3047	4426	7815	2816	3474	3425	36688	17824	3520	4737	8235	7654	17813	19220	16638	25435	48868	94489	176730	274331	355097	394279	404802	367629	408409	417059	428762	416344	424651	437489
	60	0.350755	3014	4355	3213	70568	3296	2792	7057	21138	6492	3073	94038	3352	2829	6087	2946	3375	3261	32552	18027	3618	3958	7561	8427	18578	19532	18240	26226	48379	92505	182587	273485	359378	384122	398666	366874	413494	423406	427119	422327	425522	443280
	61	0.3567	2882	3125	2198	67179	3838	3320	9945	19167	6764	2892	94253	3398	3197	5775	3043	3519	3425	27665	20093	5048	4467	6736	8434	15591	19815	16405	25567	49547	92144	181686	270917	354924	392638	406372	367904	415581	417530	430212	424058	426977	436267
	62	0.362645	2902	3907	4119	62424	3327	3361	13545	15852	6694	3050	97940	3039	3063	6199	3096	3355	3253	23419	20534	3775	4491	7266	7865	13877	21534	16928	24789	47702	91117	175513	278952	359095	386460	408100	370096	412912	424456	426204	421502	418179	432146
	63	0.36859	4286	4761	2803	61422	3609	3048	16485	9428	7495	4288	97526	3033	3572	6827	4236	3743	4721	18520	21554	3379	4496	7635	9296	14923	21222	16042	24661	50057	90652	181144	277371	354127	390404	404466	367123	417932	427432	430812	427243	426010	427565
	64	0.374535	2746	4623	3927	61939	5069	3310	18281	6177	6504	3856	94812	2831	3776	5767	3560	5034	3552	13342	22232	3492	4238	7347	7700	13450	18988	15893	24138	48082	92284	177030	274735	366585	393498	401910	369855	412711	424377	430810	412980	427510	436026
	65	0.38048	4432	4356	2299	57653	3218	4202	16994	5678	6253	2930	97544	4329	3692	5673	2971	4985	3625	12240	22576	5031	4490	6994	7953	11913	18945	16736	23165	46761	95400	177300	281291	360107	380758	401616	366453	404707	413967	431811	424631	430484	435997
	66	0.386425	3988	3378	2333	55837	3177	2851	15425	5068	6613	3779	99644	3238	4281	5962	4607	3535	3219	11225	22399	3332	4379	7474	7439	12290	18939	16579	24001	51016	93332	182962	281254	359911	393268	405210	364811	417220	423065	430451	422838	425899	435614
	67	0.39237	3194	4568	2567	54741	3463	4510	12536	3029	5985	3864	99207	2532	5455	6380	3389	3234	3604	12269	24396	3728	3905	7244	8665	12093	19008	18138	24335	49475	94457	179964	284884	363164	392851	391951	364026	413904	424363	426754	411480	417677	427480
	68	0.398315	4307	3071	2915	55566	3579	4652	10474	2890	8399	3094	98596	2764	4174	7592	4255	3764	3515	12587	24869	3146	3840	7020	9461	13361	20729	16189	24217	46649	95633	177267	283686	361277	393479	398585	364864	407919	420175	431460	413278	420401	432379
	69	0.40426	3017	4563	3670	53553	3567	3504	6365	3180	6769	3103	97160	2458	4200	6055	2939	4815	3561	10673	26755	3099	5639	7030	7836	11269	21632	19051	23884	45446	93312	179578	275920	359897	383659	400071	368621	416562	426240	432354	410819	429151	435743
	70	0.410205	4385	2884	9758	52029	3571	4310	6087	4604	7952	4340	99303	3982	5224	5704	3165	3283	3538	12120	25327	3741	4033	7008	9482	12299	20913	16986	23463	47231	92964	186055	283789	362306	392362	401681	366871	416318	427473	429332	407996	430129	426946
	71	0.41615	2817	4541	23208	49823	3326	3185	3384	3156	6660	2697	96334	2859	4623	5711	4252	3077	4741	10450	26471	3858	4204	8724	7564	12046	18930	16935	23155	49493	94323	184172	277498	357149	394674	403607	367411	414767	427736	431341	394451	426308	432575
	72	0.422095	2738	3275	51006	47265	3515	4401	3019	2937	6534	3238	97926	2706	5700	5292	2822	3944	4524	10531	25319	3676	3923	7193	8524	12079	17968	15877	23486	46421	95602	182410	278401	359860	396772	403120	370009	413776	421602	422378	398735	430257	439823
	73	0.42804	2964	3123	94036	48337	3451	2950	2910	2997	7659	4107	96735	2860	4155	6001	2997	3217	3208	11135	20237	3406	5226	6618	9612	12296	18886	16089	23927	47736	93677	182218	280256	362680	384567	399727	370395	414973	425075	431507	399366	424857	428074
	74	0.433985	4266	3411	143746	47233	3681	4348	3109	2860	6897	2734	97064	3427	3773	7576	2990	4733	3631	13019	15720	3705	3748	8860	7886	11265	18527	16328	22754	49354	94873	189866	285152	357307	390495	392969	361612	413425	422575	430637	404697	429726	434438
	75	0.43993	2676	3406	189680	43604	4791	4636	2577	2996	6304	3112	95972	3624	4092	5983	3274	3607	4266	12197	12182	3708	4125	7804	8515	11284	19256	17181	23000	51700	94189	186011	284628	359006	389046	402692	360295	401479	423717	433732	394496	427819	438485
	76	0.445875	2988	4394	233035	43792	3621	3004	4003	2661	6522	2839	97374	3738	4306	6790	3858	3341	3390	11385	9896	4552	3841	6605	8495	11992	20803	17035	24623	49228	93889	185819	279297	360358	395100	398961	368210	407191	422054	430178	397689	427962	432138
	77	0.45182	3317	4727	267316	43066	3693	3031	2794	3103	6556	4373	99614	4338	4143	5786	4057	3711	3298	12430	7770	3401	4124	6250	9549	14015	18568	16445	25468	49187	96088	188418	280926	360311	392184	396746	367970	406364	427385	425059	405099	430587	432365
	78	0.457765	4153	2999	293910	42075	3010	3341	2536	2697	6599	3082	94553	3576	3999	5318	3746	5190	5009	13561	6946	3296	4345	6329	9442	14783	18238	15615	26861	50592	94777	189573	271899	359052	382681	405157	368691	412997	418896	425089	402034	423607	431374
	79	0.46371	2734	3400	314361	39388	4900	2786	3866	2653	7856	4355	95538	3538	3809	5429	3856	3302	3671	11575	8061	3490	3955	6028	8124	19840	20618	16485	25206	52649	100220	190471	272808	362664	385229	401694	360758	417004	426250	426172	407158	430900	436670
	80	0.469655	3780	4947	333549	38980	5026	4273	2920	3049	6636	3209	95554	3588	3874	5062	3955	5299	4606	11246	6559	4916	4017	6770	8785	35787	18982	17214	26003	50139	97661	192130	278314	355642	394461	402285	367306	410315	426805	422943	402323	418934	428353
	81	0.4756	3070	4195	334838	40304	4913	3264	2842	2563	7510	4423	95239	3691	3714	5354	5323	3435	3744	11519	5794	3350	3816	5650	9571	69721	18979	18683	24880	49988	99904	193793	281205	360305	391212	403234	368387	412283	427278	434940	393775	427505	436941
	82	0.481545	2900	4420	354847	35744	3754	3136	2424	2908	7703	2694	98772	3528	4205	4977	3892	3337	3548	11978	5769	3158	4288	5599	8869	127145	18631	17053	24660	51088	94168	199514	282652	361758	389093	407824	362276	413533	427226	436007	401002	430534	422521
	83	0.48749	3053	3107	366641	36067	4947	3074	2167	2813	6342	4227	97758	4953	3994	5578	3842	3676	4799	13379	6474	3577	5539	5287	8788	226451	18777	17252	27662	51905	102551	197682	280892	352186	389546	410647	368802	412989	423177	435548	404454	430492	434541
	84	0.493435	3369	3975	373890	32286	5237	4218	2643	2535	6524	3152	101217	5250	3867	5655	5409	3346	3468	11686	6147	3007	4192	5144	8242	348237	19456	17332	25950	50299	100217	200612	278647	362116	388018	408700	368431	412441	423418	438815	399898	427598	440304
	85	0.49938	4070	2886	378994	31626	3651	3135	2286	2776	6318	2907	100835	3389	3747	5246	3702	3312	5226	11197	5904	3175	3509	5588	8414	485140	19470	17612	25490	49784	103097	195203	283301	360022	386344	407855	371849	411049	428120	441354	402284	425985	436280
	86	0.505325	2497	3084	380233	33020	3214	3265	2504	3033	6153	2798	101473	3048	5408	5750	3881	3436	3731	10728	5677	3367	3978	5531	8419	601833	21570	17117	25072	53624	100866	203967	284815	357534	393182	405792	363463	414711	425543	439874	388552	417620	429084
	87	0.51127	2971	3141	381054	30724	3493	3397	2235	3801	7243	4475	100095	3336	4526	6308	3572	3618	3445	11201	7426	5073	4345	5456	9839	642842	19612	16339	25606	50123	104950	203588	287291	360687	391850	404335	369593	413790	421889	431652	398837	426552	430824
	88	0.517215	3907	4036	384468	29373	3495	3276	3710	4209	6197	2879	100984	3330	3932	6418	3160	4880	3556	10643	6324	5077	3938	6282	8804	572714	20852	17764	28100	52038	101084	200339	277095	362720	384866	406622	368693	411764	427532	432006	398495	434006	429478
	89	0.52316	2874	2998	382391	29448	3356	3452	2439	3818	7388	3057	97900	3360	4053	5020	3243	5287	5056	11835	5833	3539	3974	5896	10165	413821	19601	16792	25511	52570	105201	197776	285072	353229	396862	406713	372679	406664	424944	440932	389965	430119	433590
	90	0.529105	4096	2973	387241	26917	4492	5040	3830	2732	6122	3170	102821	3460	5431	5290	3147	3842	4983	10545	5936	3716	3797	5988	9142	252452	19310	17208	26274	50729	106064	205474	278171	359943	398099	394556	368112	415554	427699	436250	391121	418212	437554
	91	0.53505	2756	3118	387142	26630	3446	3584	2338	2441	6264	3007	101763	4770	4287	5353	3127	3733	3792	9952	5596	3607	3878	5437	9813	138322	18530	16529	27679	51206	107770	207281	287286	359455	396439	406024	368755	413819	425403	437760	398801	426012	439041
	92	0.540995	2721	2856	391680	25405	3745	3502	2312	2677	8302	3085	99794	4704	4436	4823	2752	3643	4042	10330	6054	3539	4341	5912	11077	70431	18048	18682	27301	50217	106561	201381	285274	359710	398730	399443	362113	418281	417295	438801	397336	429216	428284
	93	0.54694	3065	4438	393192	27183	3289	3608	3030	2408	6759	3277	97209	3618	5673	6373	4104	3391	3696	10510	5991	3335	4033	6172	9368	38140	18738	17452	29055	53603	102793	208036	287266	358804	388831	403503	359594	414659	422164	425150	400007	431973	429629
	94	0.552885	2851	2721	388634	26915	3598	3176	2574	2719	6860	3026	99614	3255	4174	4997	2991	3119	3191	10174	6149	3615	4570	7534	10595	24560	20106	17439	27387	49049	101678	203562	283589	366810	399183	408387	368589	415986	429999	426199	400379	416877	436340
	95	0.55883	4226	2819	376527	23510	3740	4237	3784	4062	6709	3383	98175	3980	4023	6433	2840	4868	3632	9612	5680	3561	5801	8210	8842	18276	20176	17103	26011	52342	100935	201461	286414	361869	389815	399710	367630	417285	422903	432932	393752	426795	438077
	96	0.564775	3376	3965	389023	25000	3716	3245	2563	3076	7202	3256	94968	3271	3646	6431	2238	3572	4640	10205	5780	2899	5725	7834	9087	16498	19242	19329	25954	51154	106919	201234	281619	368994	393338	405787	369677	417842	428032	431487	389611	423923	428214
	97	0.57072	3360	2778	390168	22896	3687	3043	2801	2795	9755	3028	90943	3388	3805	5139	2853	3405	5053	9645	5964	4856	5519	8731	9428	14718	18731	18238	25943	50759	104190	206599	285571	357665	398519	409300	356715	419934	415962	423959	396079	424174	436699
	98	0.576665	4344	2840	392347	22884	3789	3346	2716	4228	12457	3009	82064	3120	5046	5117	3883	3207	3813	9336	5779	3530	4589	6885	9033	14312	17728	17951	26771	50341	104652	206531	282364	363156	386555	401330	367084	411250	428119	430341	399256	429304	437025
	99	0.58261	3171	4313	393939	21473	3620	3341	2537	2957	18626	2865	71097	3181	4809	4940	2443	3675	3153	8986	5905	3565	6178	6859	9497	13582	18146	17350	25409	49927	105594	199991	284842	362248	397222	404351	367460	407959	425313	429713	395897	430257	437602
	100	0.588555	2601	2895	391912	20455	4001	3944	2412	3030	30701	3227	57772	3098	5410	5140	2652	3745	3636	8932	6166	3572	6533	6407	9881	12810	17082	17866	26078	54619	102205	202223	281139	364328	399016	399634	367153	413743	427917	430627	388333	428179	436249
	101	0.5945	2753	2880	389809	20677	3243	3232	2458	4552	46589	2743	42903	3406	7293	4885	2470	4860	3502	9057	6062	3779	5993	8336	10095	13201	17525	18759	25758	51389	109776	205179	282226	357751	398673	409918	367862	405537	429438	430389	384018	421717	441889
	102	0.600445	3016	4235	388572	17758	3799	3786	2396	3134	62341	4183	31447	4166	11790	4774	2699	3920	3524	9002	5873	3676	9873	7208	10357	12393	17399	20313	26568	50819	104206	209520	287263	361697	388944	398586	368177	420818	427353	431478	391131	428932	434503
	103	0.60639	3190	3563	386729	17801	4030	4943	2429	4024	82718	3107	19865	4709	19125	5002	2550	3308	3564	8969	5446	3261	14866	7275	10210	12670	17215	19397	26964	51919	104613	201667	288109	365781	397930	400801	363437	416684	427907	427577	393762	427995	436350
	104	0.612335	3201	3015	387255	19020	3937	3493	2551	2843	95046	2984	14057	4849	31475	4525	2518	3665	3436	9359	5225	3499	25324	6741	10593	13284	16867	18304	26903	55166	106351	201961	288462	367945	389724	401095	358662	414266	421162	429753	391095	427534	436844
	105	0.61828	2528	3122	387390	17580	4662	3766	4313	2882	95633	2734	8416	3736	49259	5054	2486	3613	4857	10377	5362	3476	45567	6619	9836	11722	16752	18518	26664	53047	106448	210916	281811	364562	394964	405304	369480	413291	418970	431664	395875	421192	428725
	106	0.624225	3021	2904	387598	16252	4107	3373	2865	3318	87072	2859	5932	4935	70457	6732	2630	3192	4860	8582	5403	3614	75246	7520	10210	11928	17286	18744	26097	52513	109564	212335	292046	356940	396118	408548	367333	406359	426548	433486	387265	428383	433382
	107	0.63017	2790	2957	382784	15152	4486	3533	3247	2885	70150	2730	5095	3469	91314	5173	2590	3524	3185	8652	7171	3523	112780	8694	9942	11166	18387	19865	26417	55720	103949	216062	289357	369110	399145	395353	364259	416603	417348	431601	392088	420262	438890
	108	0.636115	3154	3275	385125	16171	4739	3907	2781	3242	48884	2796	4377	3578	109028	4803	2787	3328	3560	8615	5344	3743	151418	7326	9105	11369	17209	18511	27277	52127	111085	212356	290350	361638	400282	402198	366227	413960	427299	420261	392976	431407	437179
	109	0.64206	2991	3486	384819	15241	4889	4927	2638	3336	31026	2666	4187	3613	122942	6240	2832	3368	5327	8864	6762	3656	194839	6879	9655	12005	16599	18532	26883	53688	104901	212602	289006	367719	398754	403216	369113	407237	425236	428919	387116	428576	426210
	110	0.648005	2660	2993	383203	12844	4869	4154	2933	3282	19437	3026	3272	3618	129097	5127	3843	3394	3552	9028	5520	5979	227864	8475	10361	12364	17519	17842	28555	57272	109995	215599	282160	355932	391492	406884	360872	406340	420179	429417	393864	430679	427971
	111	0.65395	4195	3000	380538	15043	5250	4147	3756	3037	15042	4336	3665	3640	120301	5113	2802	3255	3431	8890	7195	4678	226940	6877	13540	11396	16014	18301	30002	54189	109937	215397	281532	365323	394420	396674	373062	414645	427830	434045	388601	421318	425268
	112	0.659895	2876	3031	382418	13603	5569	3735	2872	3159	9688	3220	4173	3902	109147	4920	2754	4518	3885	9333	5700	3989	205494	7286	26436	11466	17475	18461	27142	55636	115004	222683	290357	356597	399158	395104	372670	411010	415432	432132	390032	430192	438687
	113	0.66584	2930	2788	378001	14257	5630	3913	3694	3394	8276	2917	3539	4102	99369	5169	3800	3490	3516	9069	5714	4108	166718	7648	49681	11309	17130	21210	26127	55919	110058	217246	285220	361578	398704	407382	365639	415806	424968	430315	389821	429850	438211
	114	0.671785	2931	4100	377595	11924	6492	5432	2921	3510	7168	3216	3713	4821	95405	5735	2837	3347	5139	9335	5324	4018	112671	7431	99101	10919	16848	19045	28129	55922	113108	221741	283839	363315	394660	391791	362101	413962	423898	433281	395754	417534	435226
	115	0.67773	4271	2744	375008	13453	5366	4626	2900	4752	6002	3210	3470	5747	88148	4376	2824	4912	3299	9826	5445	4183	71014	7691	143091	11277	17692	19045	26371	56491	112744	222020	288198	359426	401707	408338	361501	410042	420396	432212	392197	414711	428162
	116	0.683675	2937	2898	375492	11862	6203	4480	2511	3110	7883	3086	3253	7253	88105	4250	4224	3495	3635	9720	5287	3854	45563	7662	154954	12715	16646	21162	25535	57111	115367	222849	283593	363812	401448	403065	369937	413811	430840	430947	388296	428896	438986
	117	0.68962	4345	2590	368248	12197	5620	4452	2614	4559	5866	2913	3463	10625	82973	4516	2773	3305	3412	10056	5529	3701	28327	7483	108913	10552	16696	18933	26847	57222	113187	213253	293067	363011	403106	396166	368381	416202	430594	429649	389848	430108	441401
	118	0.695565	4141	2964	368050	10803	5204	4614	2530	3312	5416	2966	3284	10981	82253	3625	4185	2935	3944	11940	5399	3368	19871	7545	50964	10568	17280	18349	27479	56407	108722	218246	293410	366329	394771	405598	366022	403543	421778	427545	396110	429541	429701
	119	0.70151	4104	4324	368109	10290	5148	4479	4158	3253	5050	3138	3219	12408	71866	3117	2444	2772	4984	11020	5562	3443	15126	7565	21825	10937	17149	19624	28114	57169	115495	216390	293278	360425	404637	405964	367976	416003	422280	429507	392036	416919	441875
	120	0.707455	4243	3280	367145	10942	4347	6639	4024	4550	5107	3099	4372	12348	63159	4594	3963	3311	3637	10555	5299	3150	15870	7486	12073	10260	17177	19877	28050	59794	111833	214465	292805	364842	389270	410031	366796	407460	429478	430926	392789	420057	442243
	121	0.7134	3296	3195	368094	10649	4666	5767	2844	2863	6835	4022	3131	13651	52143	3454	3946	3376	4988	11712	5636	3720	13462	7683	11196	11315	17389	20998	27854	56371	111415	220223	291772	360455	402311	408652	364641	407029	422281	428840	388530	429033	435364
	122	0.719345	3759	2822	351724	10572	5318	5325	2847	3069	6480	4557	3292	12051	39672	3493	2611	3953	3326	10980	4925	3542	13928	7190	10954	10831	16885	20192	29036	55771	109165	222732	293344	356534	399005	396887	366684	413609	427836	428897	388594	424065	432162
	123	0.72529	4067	3126	359030	10784	3835	6274	2482	3564	5213	3385	3485	10732	29992	3573	2788	3417	3142	11237	5401	3991	11698	8470	9837	11630	16598	18797	29105	57409	111845	216891	294830	368209	393576	399913	370630	415858	421443	434228	389639	425206	430451
	124	0.731235	2975	4349	361785	10498	3589	4151	3048	5051	5402	2870	3332	9998	21567	3397	3185	3402	3391	11180	5246	4219	11622	7172	9905	12772	17637	21723	28493	56214	111979	227559	289589	364750	401434	405588	359751	416548	427850	431625	389669	428644	436319
	125	0.73718	4369	4435	358665	10274	3617	5498	2782	4647	6589	3272	2850	8358	14631	3522	3006	4548	3139	11534	5517	3970	10975	7324	10819	11048	17124	18561	29425	55986	110161	226597	293119	369094	402331	403971	359697	409872	426534	431877	399037	428084	438047
	126	0.743125	2993	4279	351547	8985	4872	5861	2570	3573	5129	3127	3016	7129	10861	3991	2825	3066	4955	11858	5744	3985	10449	7795	10311	10323	15803	19395	29095	59807	115106	223017	296420	370716	400764	402046	368427	417166	417059	431995	395983	418841	435767
	127	0.74907	2765	3033	348694	8875	3854	4668	2812	3181	5159	3122	3561	6112	8489	3519	3002	2745	4942	11575	5435	3827	9358	8009	9170	11476	15720	21512	29680	55053	117573	229625	294471	365569	391119	408725	359419	406120	420030	432943	400143	421106	424279
	128	0.755015	2610	4652	349591	8633	3533	6263	3069	3233	5203	4109	3217	6136	6650	3543	2865	3069	3444	11402	5284	3740	8378	7136	10529	11293	15881	18792	29055	60540	115073	225433	294389	359504	393054	402181	369068	414164	433320	432466	407284	420791	430996
	129	0.76096	2889	4257	347714	8066	3427	4589	2529	3416	5521	3066	3223	6908	6125	3594	3945	3355	3115	11451	4608	4004	8197	7332	8316	11368	15978	18132	28489	57946	111956	225711	293166	365953	405011	406518	367123	415213	428580	432453	405600	419119	439596
	130	0.766905	4186	3235	344721	8373	3667	3989	2763	3477	5409	4152	3451	5990	7185	3486	3659	4712	3390	11639	5247	3939	7957	7988	9504	10508	15994	21032	27741	58458	115819	230693	295788	372086	400449	407194	359315	414697	427215	431650	403015	427500	430968
	131	0.77285	4202	4341	343417	7727	3685	5185	2683	3108	5593	3050	3094	4622	6774	3612	3135	2989	3307	11399	6082	3863	9107	9261	8849	10386	15327	20000	30694	61099	113363	231623	296477	364271	394942	399087	366811	416794	433059	434535	409190	428148	436052
	132	0.778795	2955	2696	344439	7397	5380	5961	3099	3511	6837	2821	3297	5201	5529	3284	2378	2898	3717	11740	5267	5450	7682	9438	8284	10171	15175	18761	29899	58810	117489	230127	291624	360121	402881	395091	363815	415880	420649	423631	408966	420048	438912
	133	0.78474	3195	2768	344160	6755	3390	4284	2567	3334	5279	3215	2711	4939	5604	3207	2611	3060	3490	10939	4970	3383	6935	8384	8690	10775	15560	21426	28096	59170	113237	230211	297442	366881	398330	401873	359852	416086	432499	430882	405700	420499	436299
	134	0.790685	3231	3290	342533	7654	4272	4250	2603	3061	5009	3365	3477	4722	5134	3275	2529	3184	4459	11095	5111	3316	7000	8925	8248	9790	16506	20596	27829	59521	114623	229849	300579	362345	398607	405253	372027	416954	430108	427457	403659	422346	439436
	135	0.79663	3001	3005	337261	7245	3626	3956	3581	4311	6904	4934	3735	3667	5552	3308	4000	3237	3195	8490	5136	3631	6044	12176	11067	12246	14605	19459	29265	57920	114724	233904	293647	365405	396618	398731	369468	414781	420486	425699	406480	422901	438375
	136	0.802575	3847	4846	325556	7091	3690	3942	2854	3755	4951	3704	2879	3578	5188	3046	3743	3614	4836	8375	5591	3616	6335	11543	10700	11699	14682	19119	28285	58944	118130	230752	299493	372189	390146	404362	368688	411301	415719	434554	407521	426015	437396
	137	0.80852	4625	4382	334788	6768	5091	4183	3892	3357	6426	4168	3074	4290	5284	3401	2591	3128	3837	7294	4788	3519	7745	15080	9831	10218	14841	19343	28781	57097	119796	231229	288617	368064	401767	407061	366648	415564	430231	427653	404834	431925	435360
	138	0.814465	3111	3130	327160	7543	3379	5453	2521	3373	4934	6030	2816	3541	5345	3292	2750	3501	3309	7391	4626	3776	6538	17594	10750	9756	15217	19134	30118	59520	121928	237613	299096	368883	400998	405933	369123	415749	427807	432931	400595	422471	426565
	139	0.82041	4229	3416	327806	5936	3033	4334	2491	3345	5103	4388	4471	4273	6167	3213	4183	3211	3570	7570	5689	3155	6014	19619	8958	9913	14455	20052	28372	59866	120539	237523	290654	368836	391108	402958	368506	409030	427488	436005	407599	429423	438413
	140	0.826355	2704	2760	323673	5471	3511	6109	2901	4892	5484	4561	3440	2719	5300	4605	2938	3470	4885	7401	5413	3342	5870	25637	8731	9679	14641	19557	28470	58619	121646	240787	294404	369972	405532	404590	368919	420656	429706	429604	405390	426881	425497
	141	0.8323	3010	4485	320624	5435	3588	4493	3668	4829	6396	4537	3262	2805	5194	3095	2877	3686	3648	7617	5249	3982	6274	25545	8549	9868	16119	20129	27747	62422	121206	239224	288691	366356	395140	401132	371847	415075	428131	431865	402507	421544	436940
	142	0.838245	3001	3483	319772	5920	4832	4421	3856	4964	4884	4942	3428	2774	5092	3660	2785	4632	3552	6912	4839	3972	7864	26337	8121	10268	14695	19073	28571	58884	120007	235781	290196	367953	399996	410989	369596	419243	432832	431011	403605	420752	436940
	143	0.84419	3003	3079	321012	4860	4993	5704	3607	3517	5201	4971	4175	4756	6326	3339	2273	4504	3669	7186	4924	3744	5851	24847	7662	9880	14724	20582	28559	63867	122882	235667	295287	370373	404389	391350	371436	417654	427246	441078	398134	427470	436940
	144	0.850135	2781	4396	319313	4655	3771	4899	4060	4785	4936	5137	4406	2982	4690	3779	3574	4487	4207	6784	5542	4139	6346	21563	8473	9070	14989	19596	29568	60723	125401	237481	294787	356842	396996	401780	363632	419867	427644	426750	396396	418314	436940
	145	0.85608	3077	4004	319031	4765	3972	4151	2574	3765	4880	4400	2892	4017	4415	3744	2657	3194	5399	6816	5028	5517	5807	20794	8377	9551	17027	19318	29382	60911	118214	243489	301240	355206	387945	402426	373029	416988	427626	424172	394842	428912	436940
	146	0.862025	4491	4568	317425	6111	3853	4235	2856	4570	5281	4927	3146	3352	4651	3638	2580	3598	9149	7045	4554	3694	6095	15342	8628	9555	18981	18598	29700	63619	125106	244156	297158	363780	400302	401149	361783	416679	429522	434375	391344	429480	436940
	147	0.86797	4127	3714	309404	4821	3789	4235	2388	3438	4736	6238	3143	4409	4611	4939	3067	3415	11720	7267	5192	4024	7972	13343	8417	10214	22407	18936	30072	63201	121318	239782	299211	362163	395077	396384	367201	412684	430398	430260	393520	431216	436940
	148	0.873915	2615	2879	306669	5911	3817	5697	2502	4784	6245	4802	3012	3012	4833	3297	2541	5049	16306	6588	5070	3926	5893	11118	8478	10087	24137	20775	29392	60079	121615	239856	297806	366354	401922	399396	368972	407169	428926	433761	395917	424607	436940
	149	0.87986	2882	4314	302782	4867	4742	4372	2813	3603	5025	5126	3053	4816	4589	3735	2695	3541	19878	6978	5225	3704	6253	9137	8049	10600	25563	19854	30137	61868	122943	246327	301833	366433	394968	395713	374847	417091	416467	427897	392984	427269	436940
	150	0.885805	2816	2776	293691	4620	3821	6533	3503	5080	4913	4852	3119	5000	5083	3204	3306	3311	20667	6991	5143	4133	5222	9287	7338	10015	27591	20035	32739	64112	122674	244073	295161	359341	399518	403507	370113	406274	428005	434226	390411	426463	436940
	151	0.89175	2841	4037	297616	4219	3700	4568	2466	4941	4871	4990	3070	3685	4507	4412	2655	3448	20704	7566	5143	4163	5580	9093	9201	10492	24857	19592	30330	62844	121213	247784	301334	360808	397530	404672	376037	415200	426151	424426	394482	419965	436940
	152	0.897695	3867	2934	295379	5702	3845	4616	2594	3678	5081	5130	4308	3786	4113	3319	4009	3513	19246	6465	4975	3705	5289	8676	8320	11005	23898	20524	30843	60566	124726	252321	295397	368253	400868	405588	368248	417594	428911	430138	392437	428264	436940
	153	0.90364	2813	2684	292872	4170	3851	6121	3927	3206	5928	5607	3233	5582	4370	3397	2773	3819	17551	8282	4813	3939	5079	9629	8823	11809	23235	19760	29854	61042	126972	245032	300064	367886	400649	408306	373860	416606	425381	422038	393470	426452	436940
	154	0.909585	2883	2871	295698	6216	3624	5483	2684	3514	4582	5400	3004	4384	6064	3203	2616	5266	15842	6225	4910	3952	5700	8499	8399	11790	23168	20312	31273	61432	123628	250402	298538	364525	402685	403683	373396	412876	432669	422191	392802	426781	436940
	155	0.91553	4365	2959	292110	4545	3893	6869	3808	3976	4614	5332	3780	4033	4313	3364	2904	3445	15761	6463	4688	4205	6709	8634	10742	14458	21093	19818	30238	62314	123987	252320	302098	364758	401147	404206	371934	412405	417866	422703	382705	429031	436940
	156	0.921475	4248	4144	287765	5444	3810	7035	2474	5592	4951	5563	4196	4517	3895	3425	2918	3638	12268	6577	4815	4091	8939	8453	9946	24664	21451	20001	31249	61678	126755	245370	298310	373201	395881	405912	373715	417690	431222	429304	391049	429694	436940
	157	0.92742	2751	2778	287484	4180	3873	5293	2926	4244	5007	5392	4416	4517	3842	3174	2781	3648	11181	6183	5357	4576	12273	8299	7988	55430	22247	19245	30852	65586	125242	253817	302379	369453	399581	405882	371757	418515	429167	430504	395120	422738	436940
	158	0.933365	3000	2671	283216	4002	4568	5390	2416	4084	4883	4981	3007	4623	3770	3439	3134	3559	10168	6145	5092	3949	16094	8126	7465	140188	20551	19408	32674	62852	130530	246617	300624	366729	399033	409444	359241	415594	426286	436669	390764	418204	436940
	159	0.93931	4292	3936	275751	4478	3701	5449	4027	3910	4876	5176	4308	4639	3826	3178	4403	3211	8889	5763	6024	4275	22214	10092	7701	300860	18646	18991	33852	65791	127006	254338	299233	373318	389961	399405	369471	410163	428864	427735	391476	431165	436940
	160	0.945255	4880	4036	277322	4658	3639	5556	3669	5019	4677	6602	3234	4292	3807	3366	2806	4356	8196	6783	4943	5518	28784	8431	7826	554483	20535	19851	32106	62563	127747	255635	298663	371801	401839	412885	367588	414454	424180	434900	397673	427647	436940
	161	0.9512	3044	2811	274879	5638	3658	6935	3741	5216	6591	7117	2940	4834	4504	3157	2521	3715	10347	6256	5328	3967	34293	8098	8342	891220	18757	20227	33281	65826	124002	251613	299773	369528	402451	406374	362568	408988	417142	432483	387091	427901	436940
	162	0.957145	2927	2915	270193	4142	4977	5679	2347	3505	5091	5385	4187	4890	4020	3304	2711	4837	9514	8104	6682	4146	36586	8195	8037	1250359	18027	20028	33477	64416	128772	257389	292558	367479	403411	405552	369153	413760	420352	432727	397197	422294	436940
	163	0.96309	4182	4060	260017	5714	4034	6687	2716	5505	4923	5286	3264	4436	4413	3257	4050	3712	6882	6455	5007	3872	39447	7743	8351	1555383	18377	21939	33035	64149	128976	252894	297898	373718	403231	396511	371980	411033	427936	433389	385436	433130	436940
	164	0.969035	4360	3094	267783	4717	4761	7580	2880	3860	4745	5769	4170	4978	4077	2978	2342	3814	6988	6042	4937	3898	41843	7949	8709	1709381	17370	20372	33524	62447	126084	261658	296755	375889	401296	399686	370199	417311	418845	423917	392894	418376	436940
	165	0.97498	3142	3083	266410	4270	3670	5724	2686	4282	4421	5430	2844	5936	4144	3392	3958	3647	7447	6210	5230	4071	40595	8114	8659	1631219	15419	20688	31524	67186	129299	258203	302897	377062	404317	404129	367397	421470	427443	429699	380422	429239	436940
	166	0.980925	2658	2950	260095	5961	3479	5739	2430	4462	6057	5239	3166	6163	4685	3362	2907	3198	6311	6448	5025	4400	37381	10218	7897	1219590	15472	20188	32365	65134	128301	260494	299876	368964	407901	404657	368249	406608	422045	434542	389565	429465	436940
	167	0.98687	4379	3921	262045	4519	3990	6285	3701	4436	6280	5734	3213	5622	4049	3306	2774	3560	5849	6265	5961	3683	37124	8007	8077	671804	15735	22529	31880	64306	131081	258557	305016	374163	401497	409833	363465	422740	427337	433711	383782	430294	436940
	168	0.992815	4516	4463	258394	4742	3612	5181	2414	5312	4920	5143	2997	5247	5395	3150	3998	3942	5012	6298	5333	3690	32223	8233	7917	278192	14737	20839	32358	63275	131611	253703	299229	367564	402540	409315	366239	418834	422012	433822	390843	420696	436940
	169	0.99876	3130	3861	254736	3760	3569	5081	2761	4054	5038	5518	3085	4760	4416	3732	2843	3365	5159	5823	5229	3845	32084	9694	7797	89155	15050	21961	31802	63675	131372	263868	303384	364666	407813	407298	367705	411026	427701	432975	388790	428429	436940
	170	1.00471	3086	2864	252636	3804	3562	5147	2054	4441	5908	6656	2881	4600	4464	3239	2695	3449	5029	7733	4705	3722	28569	11434	8042	33261	18155	21345	31157	66152	127799	264977	304288	372392	402129	408508	365484	415568	430330	434005	392482	430824	436940
	171	1.01065	3289	2862	245429	3932	4500	4665	2677	4462	5232	5750	3315	4955	5149	2886	2889	3962	4454	7820	4901	3481	26623	11494	7846	22028	16647	20186	30564	64525	131454	259847	302854	370289	404128	407810	370880	416482	429079	431866	382478	424588	436940
	172	1.0166	2897	2611	243422	4164	3805	5114	3724	4126	6479	5751	3474	6498	4112	3265	2510	3336	4582	6076	5479	3839	25437	16964	7274	18661	16550	23340	30853	65345	128048	264747	301991	375049	401453	402987	368899	410821	432812	430546	388496	427411	436940
	173	1.02254	4215	2794	240881	4290	3997	5010	2325	4158	4841	5557	3420	4974	3978	2817	2428	3582	4529	6233	5053	4082	26572	31298	8093	17877	16438	20413	30857	65708	132692	262588	297108	366193	408174	406290	370156	417069	427071	426214	390671	425084	436940
	174	1.02849	3161	2968	241958	5148	5039	5310	3904	4515	4942	5818	4868	4345	3946	2808	2451	3983	4359	6197	6484	4118	23301	59368	8193	15273	19552	21858	31356	64050	129713	271008	303299	378152	406633	396894	368613	415567	431203	420663	389618	430024	436940
	175	1.03443	2837	2810	238959	4225	3527	4869	2786	5901	4819	5816	4828	5695	4200	3092	2579	4857	3957	6681	6244	4244	21952	106060	9843	14232	17560	21001	31050	65775	132424	266840	297476	375530	398879	406852	368725	417956	419519	422273	389207	426662	436940
	176	1.04038	4878	2997	233818	3933	3980	4807	4247	4445	5848	6932	3890	5296	3966	3357	2681	3361	4164	7259	4691	4006	21537	155328	9583	14532	18348	23430	30702	65592	136256	267128	301252	374029	404557	406893	368378	413928	429509	434455	389614	429315	436940
	177	1.04632	6439	3874	230346	4416	3768	6281	2745	4330	4764	6112	4364	4280	3984	3346	3122	4872	4386	6145	5465	4172	17179	188211	8092	13329	18317	23406	33150	63583	132495	266201	306415	370230	402369	407374	371839	411895	424720	422892	379100	422631	436940
	178	1.05227	7543	2821	228433	3438	3708	6082	2550	4250	6839	5716	4339	5162	3604	2720	2536	3519	5077	5897	5714	3761	14484	193920	7624	13539	17812	23157	31788	66632	131692	269450	298589	366194	397405	411378	372462	409908	428390	436920	388822	434202	436940
	179	1.05821	11530	2944	225031	3834	3969	4843	2255	5372	5028	5848	4088	5386	3848	2892	2780	3417	3969	5542	5326	3765	12624	172383	8099	13137	15986	22271	30572	69719	132742	268096	307354	365287	398271	407688	366360	413633	428600	433636	388530	426480	436940
	180	1.06416	13967	2717	218884	4060	3642	5065	2372	4437	6596	6013	5408	4319	3580	2937	2780	5265	4168	5252	4959	3479	10999	124561	8585	12691	16206	22798	31063	67591	138082	273530	306647	372516	407940	403481	370754	412532	421122	434108	390289	426523	436940
	181	1.0701	16069	3797	219945	3726	4657	6830	2657	4736	4638	7373	4054	4182	4267	4363	4123	3577	4898	5440	4789	3778	8849	82321	8433	12737	16004	22325	31541	68152	140095	272848	305872	370480	403067	407204	370584	414450	425206	425023	388232	416145	436940
	182	1.07605	18533	4195	217324	4828	3884	5522	2657	4793	4761	5974	4085	4120	3490	3045	2452	3673	3919	5698	5052	5159	8427	50815	9773	14040	16841	22385	32226	65311	136494	268995	308394	376223	408991	408496	371979	414009	425887	436175	387847	428684	436940
	183	1.08199	20459	2857	211954	5145	5157	8226	2857	4330	4471	7290	4214	5007	4090	4416	2780	3528	3483	5187	4992	3730	7707	31444	8064	12449	14805	24182	32626	66641	137513	271781	300736	373898	405381	391410	372639	415556	429254	429848	394200	431544	436940
	184	1.08794	22756	3937	211701	4977	3474	8334	2711	4876	6539	6974	4150	4930	3447	2964	2682	4065	4887	6127	5705	4438	7498	22797	7514	11217	15349	21525	32763	67127	136877	272463	298800	375296	402539	404134	364936	415582	425337	423022	389487	427292	436940
	185	1.09388	23803	4300	203813	4856	3548	9201	2291	4599	4937	5875	4404	4760	4083	2449	2532	3780	3171	5295	4942	4914	7162	19302	8567	11091	16015	22201	33252	66683	138759	279847	306106	367859	399050	409481	360778	418358	430718	431603	390893	428317	436940
	186	1.09983	24579	2887	203755	3704	3783	10620	2634	4705	4578	6731	4713	6803	3835	3361	2616	3200	4522	5864	5117	3531	7891	15583	10278	11034	17493	22066	34771	68452	137382	271894	305858	372255	402748	405646	368073	414501	429000	432921	382834	426848	436940
	187	1.10577	25054	4378	201770	5136	5398	9842	3803	4491	5199	7887	4427	5556	4783	4354	2273	3215	3798	5456	4372	4693	7077	14051	10044	11449	15257	23084	33306	68571	138858	281120	307676	372313	403110	399599	368987	412444	430763	428617	383285	428303	436940
	188	1.11172	27153	3084	198573	3252	4347	10131	2498	5219	4991	8091	4099	5593	3681	3141	2928	3272	3801	5644	4246	3477	6534	13188	8641	12491	15254	23417	32360	67217	139868	279269	305942	370723	403850	406535	370695	413664	432718	432583	380856	424490	436940
	189	1.11766	26727	4525	194188	3333	4141	9462	2330	4992	5093	6011	4318	5577	3748	3051	2760	3049	3420	4918	4470	5513	6949	12246	9217	11499	15806	25495	33372	67637	142449	281237	308556	375270	401472	407233	366525	413497	429462	433432	385223	428520	436940
	190	1.12361	27445	4124	194003	5466	3590	7147	3156	5118	6714	6122	5587	4746	4042	3052	2746	4414	3214	7453	4410	3821	5991	12139	8950	10605	16241	22245	33555	68412	139586	281019	307035	377675	395941	405914	370647	419882	425851	432423	382625	433736	436940
	191	1.12955	28690	2894	192556	5068	3682	7505	3464	5193	5383	7423	4378	3964	5745	2979	3255	3048	2988	5205	4493	3760	5946	11947	8464	11091	15624	23307	32138	74083	139397	280036	310249	380009	397135	398772	373997	406809	423564	433110	387876	431190	436940
	192	1.1355	28803	3770	183725	3428	4818	5318	2862	5038	5234	8103	4021	3903	3848	2810	3475	3581	3307	5868	5829	3963	6455	12882	8886	10736	17334	24942	32557	68875	144355	283788	306913	378297	400836	401181	367506	407593	430136	434190	391035	425434	436940
	193	1.14144	28775	2576	184673	4660	3751	6208	2319	4687	6838	7301	5435	4718	5271	2687	2602	3246	3451	5318	4552	4089	6039	11481	8566	10907	14899	23719	33578	73024	142122	285609	308332	367746	406585	405813	370878	405411	428509	429794	383157	422936	436940
	194	1.14739	28703	4185	182900	3521	3675	6100	2760	4786	6563	6969	5567	3268	4015	3101	2350	5054	2999	5357	4635	4127	6212	11702	8493	10657	17209	23440	35555	68688	143685	280438	304649	366330	402428	406230	361472	418008	427252	434210	389855	428010	436940
	195	1.15333	28220	4132	178427	3452	3643	4504	2732	5491	6618	6117	4253	4109	3959	3147	3585	3569	3248	4940	4610	3786	6524	11178	8313	10795	14600	21424	34084	71056	143520	281771	299756	374309	400317	404435	366942	415561	422296	429729	391096	417736	436940
	196	1.15928	29735	2921	174556	5056	3659	4406	2578	4877	5286	5251	5239	3033	4000	2833	2535	3533	5165	4966	4395	3702	6417	11680	9861	10304	16304	22491	33356	71532	144495	284774	298835	369462	405868	406927	371301	416053	427206	430792	378026	427182	436940
	197	1.16522	28456	2723	168265	4683	4169	6139	2328	5393	5136	5046	5128	2898	5231	2725	2476	3317	4895	5557	4281	3533	5895	12672	7952	11157	15675	22762	35753	72093	144335	280304	306947	378222	403700	408726	364486	414790	431959	433181	379953	419368	436940
	198	1.17117	28477	2862	169243	3280	3710	4579	2481	5618	6691	4863	3816	4639	4300	3217	2777	3201	5139	5687	4412	4034	6785	15056	8304	11035	15199	25507	35424	70741	144665	288443	298962	380582	399519	396971	360341	414957	427132	429558	386842	428043	436940
	199	1.17711	28933	2459	169161	4607	3704	4410	2820	5315	4794	4378	5087	4290	3816	2732	2435	3580	3113	5798	6137	4088	6685	12714	8088	11237	15247	25428	35618	71034	144907	287663	303597	379066	407459	406889	369713	418002	430041	431470	377468	413960	436940
	200	1.18306	28543	4105	164475	3273	4073	5836	2172	5040	5148	3878	5444	4280	3739	2885	2786	3811	3163	5510	4117	4218	6591	14735	8210	10911	15997	23058	34776	76050	145476	283219	305436	380698	395554	407220	370484	417038	427829	423566	382519	428015	436940
	201	1.189	27898	4215	162144	3404	5188	5950	2484	5623	5382	3977	3548	2678	4997	3090	3997	2860	2916	5818	4734	4224	6316	14326	7937	10707	16015	23477	34412	73110	144558	284338	311101	374830	406618	410180	368414	419435	425690	436794	390546	420472	436940
	202	1.19495	28435	2999	159639	2855	3653	6397	2868	6754	4790	3992	3680	3835	3497	3024	2729	3598	3339	5675	4556	4189	5940	12811	8352	12244	17127	23023	34838	76170	144048	286283	299509	369592	400198	410143	367705	420529	431717	426813	385171	426726	436940
	203	1.20089	27461	3043	156257	4558	5325	4357	2506	6670	4753	4696	4191	2671	4276	2848	2548	3581	3307	5795	4556	4188	7714	13041	8141	9907	16626	26216	34156	71849	147434	286714	306203	379567	397223	398663	368685	419106	428156	431178	385059	431804	436940
	204	1.20684	27624	3257	146875	4151	3515	4164	2867	5668	6058	3631	3930	4107	5683	2792	3445	3298	3429	5967	4995	4334	7168	12081	7885	12286	16549	23458	34187	73714	146533	296102	308347	372182	406752	409728	361497	412521	426500	434349	386504	429749	436940
	205	1.21278	26950	3164	149990	3329	3553	4278	2729	5782	4797	3741	3901	2630	4466	2890	2289	3131	5026	6218	4593	3593	6917	11239	8669	10003	17759	25623	34103	72586	151364	287862	311552	371689	410060	404974	373151	417814	431308	431538	386399	429576	436940
	206	1.21873	27412	3975	146351	4365	4784	6952	2768	5853	5315	3303	3712	2727	5872	3312	2339	3486	4249	6398	5758	3975	6456	10665	8202	12143	15368	24132	34050	75353	149987	288020	305260	371040	398200	410948	367058	421067	422925	432876	378180	431409	436940
	207	1.22467	26402	4204	145844	4595	3615	4257	2716	5719	4942	3407	3127	2533	6875	3055	3924	3196	3118	5975	4871	4044	6615	10296	9400	10346	15582	23489	34811	74234	148809	294994	306903	373883	407869	406748	364795	417719	426981	432139	386961	422555	436940
	208	1.23062	25144	3963	138134	3096	3846	4380	2603	5664	5165	3956	3644	2615	8822	3010	3827	3343	3085	6173	4593	3802	6618	10614	8714	10495	16914	26219	34301	76499	148543	293822	304940	377135	407390	404595	373040	420429	428641	432137	381933	428923	436940
	209	1.23656	20046	4532	138753	4423	4959	5950	3018	6587	5378	5208	3273	2971	9840	4397	3818	3172	4409	5777	4805	3564	6758	9798	8640	10574	15008	23891	34797	72509	155283	293120	309572	377162	411159	399206	365310	408000	419976	432871	384656	433141	436940
	210	1.24251	24785	4120	140601	2974	3937	4746	4379	4618	4879	4370	4503	3192	11660	2516	2628	3627	2855	7785	4878	3545	7319	9715	8160	10191	14712	24460	35861	76090	154885	294603	307768	375244	403942	410604	368736	422719	429175	432290	380710	430516	436940
	211	1.24845	23728	4408	134677	3320	4731	5630	2358	4301	4587	5111	3030	3181	12615	2953	2727	5102	4625	6467	4366	3315	7612	9122	7856	11874	13851	24238	36173	75695	155551	289350	307844	376611	411694	407031	365660	421963	432210	437032	382180	427242	436940
	212	1.2544	23921	2802	132631	3254	5060	4448	2821	3537	6241	7020	3787	3529	12686	3004	3684	3288	3178	7593	4808	3132	6950	9514	8371	10160	16002	22930	36359	72247	148892	286945	301728	370924	408301	409784	371409	414805	430384	437720	374990	426171	436940
	213	1.26034	22451	4121	130337	4565	4007	4387	2682	3483	6214	10770	2582	5380	12732	2657	2480	3990	3117	6501	4791	5145	7389	9287	8199	11813	14637	26429	34616	74955	150408	292910	309717	368701	408532	402643	374744	413068	421563	428003	384615	421453	436940
	214	1.26629	22555	2730	123277	2961	3887	4187	2645	3749	4972	18401	2675	3750	14042	2709	2551	5025	4726	6334	4884	3695	6750	8931	8607	11151	15376	23863	36960	76893	155544	295825	310745	377947	408571	413139	368647	411014	434116	431942	383400	425897	436940
	215	1.27223	22072	2759	125468	3530	5137	4280	2346	3297	4728	30360	2749	4204	13723	2546	2881	3688	3334	6012	5425	3513	6756	9560	8028	10666	16915	22876	35187	75966	152840	297881	306529	375877	405024	408802	377327	419812	430665	428601	385155	431745	436940
	216	1.27818	16533	4347	122527	3043	4938	4105	2089	2949	6374	46135	3806	4460	14260	4121	3491	3927	2533	6298	4742	3423	6636	8860	8539	11206	17902	22697	35368	74011	154708	296128	307107	372359	408507	406215	361956	418838	426890	423273	384658	427814	436940
	217	1.28412	19927	3011	121008	4308	4011	4612	3450	2714	6347	64609	2644	4529	16530	4421	2525	3465	3052	6920	5041	2917	7109	9269	8952	12196	15170	23284	35961	73460	151234	294484	310926	374676	411008	410975	366330	419759	430855	422683	387199	418252	436940
	218	1.29007	18986	2957	117522	3861	3752	4444	2271	2688	4594	87709	4150	3970	19537	4461	2197	4079	2638	6286	4834	3710	6428	11349	8933	11640	15708	23319	36929	76955	151320	289268	316074	377875	405984	410095	373270	419703	424832	431944	383639	431381	436940
	219	1.29601	17570	4152	117018	4482	3733	4329	2428	4280	4930	108902	2272	3785	19344	4219	2535	4045	3062	6087	6300	4899	8544	10153	8160	14303	14624	23573	34800	75044	156879	293302	309235	379188	408731	410150	365669	417291	430732	429660	385829	428645	436940
	220	1.30196	17499	3239	109553	3935	3180	4144	2875	2698	4998	119626	2847	4151	22476	2921	2266	3821	4343	6438	5359	3169	6974	10436	8614	13628	17352	23616	37390	78303	157087	294386	307286	378516	406841	399022	368830	418298	426019	434628	388699	427075	436940
	221	1.3079	16088	2982	110222	3755	3967	4000	2523	2451	5433	133626	2632	3735	23178	2990	2713	3419	4487	5761	5011	3314	8718	10928	7986	11739	15827	23202	35367	73303	156595	293322	317389	372349	407002	408204	368873	420881	425096	432373	378099	427706	436940
	222	1.31385	16357	2764	107767	2656	3797	3614	2434	2901	4564	138745	3188	3852	25703	2848	2448	3532	2679	6052	6623	3327	8567	8922	8301	11288	16506	23006	35025	78155	159387	296920	311080	374929	409161	411979	361069	416206	429913	438919	386143	432778	436940
	223	1.31979	17784	2539	102717	2868	4971	4792	2527	3035	6379	145188	2648	4373	25095	2540	3226	3340	2643	6494	5464	3225	6882	10467	8376	11287	16448	23667	36245	78886	154244	291153	314228	381498	408459	409145	369074	414837	428100	423201	390577	428404	436940
	224	1.32574	12245	2513	99549	3878	3791	3507	2533	2950	6027	146130	2870	4288	24034	4171	2780	3466	3115	6723	4724	4053	8472	8053	9785	11064	16484	23582	36202	79559	159920	296883	314570	379328	407431	401988	367736	420990	431158	434181	389061	429793	436940
	225	1.33168	16951	5959	101559	3163	4011	4766	2302	2708	5417	144402	2588	4540	22215	2653	2501	3064	3188	6424	5263	5136	7461	10413	8518	11174	16048	24288	37380	78884	159444	296599	315843	369509	403899	412925	369755	417710	430459	424932	387032	427634	436940
	226	1.33763	16335	6281	96890	2858	4118	4099	2082	2885	5153	143421	2272	4846	22360	2776	2483	3434	3377	5966	6228	5019	7047	8208	8811	10512	16057	24385	36870	78606	154877	292249	313524	386799	393541	411765	370818	417236	429673	432770	380660	428731	436940
	227	1.34357	15488	6829	93400	3224	3534	2980	2419	4682	6902	142807	1974	4798	22766	2834	2270	3488	3626	5832	5213	4575	7465	7770	8697	11338	16402	23371	35897	82874	155278	294203	312231	371789	394983	409310	364623	416094	429198	436647	387203	430040	436940
	228	1.34952	14655	4063	95840	3498	3873	2842	2711	4107	5515	139905	2585	6987	20929	2719	2582	4630	3807	5768	6710	4829	7737	7852	10188	10866	15730	24766	36151	82893	153510	303547	312098	374579	405998	411812	358203	417369	428771	434327	377634	428453	436940
	229	1.35546	10501	4282	95786	3210	3626	3420	2353	3517	7166	141259	3642	6315	20571	2819	3643	3493	4492	6101	5245	3847	7206	7861	8256	10584	15860	23532	37854	77969	158477	296173	315759	382922	403467	401791	364684	422821	431701	434848	388593	427302	436940
	230	1.36141	13352	3859	93974	3297	4105	3466	3039	3476	6955	136648	2641	8573	20044	4249	2474	3672	5165	6223	4918	5282	7019	7541	9009	10412	17164	24460	39258	82864	158098	302156	307810	379704	404021	409082	371554	422850	431886	434561	381993	420985	436940
	231	1.36735	13651	3964	94793	2709	5132	4610	2415	3113	5339	132402	3486	6542	19013	3203	2757	3292	6592	7074	6596	3581	8746	9788	9142	12773	15359	23883	38004	80867	158011	302803	315094	380133	394461	399794	366612	412237	420055	424980	391117	432533	436940
	232	1.3733	12995	6677	89303	3887	3480	3327	2399	3691	4663	133035	2345	7673	18075	3150	2256	3140	4995	6116	5398	3330	7680	7730	8160	11192	18557	24575	38764	83571	163220	306059	309633	381002	403157	397557	370170	421720	431285	434983	381068	431217	436940
	233	1.37924	12271	3530	85223	3751	3571	3416	2268	3657	5245	126877	2236	6877	16907	3060	2733	4550	5777	5419	4892	4128	6828	6584	7968	10784	16629	24128	36094	80959	157539	296101	312364	381315	403117	410970	372950	406480	425991	425008	391754	429142	436940
	234	1.38519	11811	4176	88914	4032	3649	2919	3334	3434	5071	119929	3665	7397	17335	3525	2914	3148	4781	5776	6069	3965	6155	7239	7940	10216	16466	24202	38092	81010	165913	301061	304054	381581	403874	412129	367991	420108	427922	429895	390170	435186	436940
	235	1.39113	12026	4298	82156	6108	4104	3216	1806	3137	5241	120276	2662	8351	15685	3247	2824	3104	5203	6296	5317	3808	6799	7678	8332	10137	15793	23870	37313	82930	161922	301135	317791	376300	405180	409307	371062	411318	426238	431511	379512	428863	436940
	236	1.39708	11317	6562	80687	6086	3874	3261	2742	3114	7464	116369	2886	6867	15201	3106	3995	3224	6695	5986	5154	3774	6855	7350	9598	10348	15453	26284	39317	79726	165884	298592	310561	377877	406115	410763	373960	417219	429811	432008	385444	422382	436940
	237	1.40302	11138	6522	82534	3620	6974	4312	2699	3285	8469	117640	2711	6947	17004	5004	3830	4735	4948	5837	4992	3807	6423	7960	8296	10503	16187	24446	41511	81433	166338	303874	312985	372736	399952	409759	371614	416331	430777	431590	390548	423976	436940
	238	1.40897	7461	3381	80678	3962	7138	3449	2539	3496	16964	115144	2634	6868	16086	3240	2756	3266	4639	6218	5897	3811	6332	7716	8976	10272	17384	23762	38216	84558	164427	297891	310728	368973	404520	404148	365636	423789	429947	420358	391866	429804	436940
	239	1.41491	10832	6972	74339	3562	7702	6398	2365	4152	40045	114829	2647	7741	13403	3107	2559	3326	4999	6040	4527	3687	7039	9577	8136	10883	16700	23599	37546	84671	163542	299178	307666	374988	406234	410871	370890	413382	428910	432284	387161	425955	436940
	240	1.42086	10692	3626	74683	6540	7286	4264	2779	3854	89316	111504	2515	6124	12818	4522	3649	3590	4896	5715	4580	3311	6637	7121	9846	10563	18021	23236	39369	82097	161973	297882	314879	377168	395164	405049	364853	417945	431330	433143	381319	429309	436940
	241	1.4268	10062	6758	70499	3732	7292	4101	2789	3753	173887	114645	3672	6252	12831	3289	2695	3973	4909	6004	4549	3832	6493	7544	8702	10327	15505	24182	39462	81803	169632	299280	309750	381168	397623	408187	368247	424208	428604	436741	387020	424672	436940
	242	1.43275	10057	6589	73699	3881	4433	3712	5171	3473	297054	111267	2626	5869	12732	3179	2824	3926	4310	5524	4761	5563	6455	7924	7752	10468	18437	24413	39032	80997	170432	305068	321201	369720	406228	408892	367742	408710	420797	434240	387077	429696	436940
	243	1.43869	9034	3909	75052	6614	7012	4598	5913	3214	449651	111337	2664	7311	11825	3442	2354	3946	5785	5752	4267	3713	6590	7769	10201	10820	16017	27489	40644	84337	171212	306183	313821	384806	405284	405475	362775	410531	435338	421846	383540	429103	436940
	244	1.44464	9196	6631	68147	3927	4697	4227	5818	4805	604776	111889	2273	6152	11314	3238	2911	4864	4227	5937	4758	3808	8281	7848	8976	9973	16521	24723	39901	82883	165266	295386	309061	381243	407465	410706	365300	408368	420088	433980	385683	432301	436940
	245	1.45058	9481	6840	66661	3783	4536	4120	5976	6483	723841	114089	1917	6025	11131	2726	2675	3946	4134	5436	5274	5208	6746	7875	7942	10532	17488	23926	39432	80801	172040	302194	314730	380054	409484	412217	372273	419817	434387	432744	382018	431149	436940
	246	1.45653	9268	3395	66173	6273	7651	6211	6258	6944	812003	109219	2313	5740	12604	3644	3309	4665	4773	6146	6057	3810	8470	8101	8803	10535	15797	24598	37574	85622	173600	302143	316458	370167	405114	408204	380049	418211	431599	434311	387049	428283	436940
	247	1.46247	8539	7330	68054	6563	4642	3783	3351	4385	840770	111612	2245	5750	10348	3597	3319	3631	4156	6646	4900	4067	7074	7863	8760	12583	16495	25061	38535	83930	170403	308194	316495	377340	396688	414317	379440	415179	421630	432103	386603	431897	436940
	248	1.46842	9378	3961	62594	4393	4509	6312	5960	5020	818141	106652	2728	7589	11423	2775	4103	3667	5127	9419	4461	3871	7130	8579	8567	10568	16356	26207	38998	84565	168364	311749	318579	372366	402864	412584	366202	419720	416358	434505	387932	429202	436940
	249	1.47436	5534	4101	65929	4053	7528	6517	3144	6464	771947	109385	2452	7185	10097	3255	2880	3397	3991	7721	4222	3971	8624	7956	8247	12654	16633	25022	39792	82244	173296	307301	306523	384154	397947	408242	372300	414570	418497	426774	393383	430845	436940
	250	1.48031	7995	3557	63942	6820	4896	7017	5987	6993	705885	110060	3430	7090	9551	3279	3161	3037	3755	8242	6144	3620	6517	8148	7149	11060	16729	24960	38879	83275	168596	301680	316318	380505	404386	413358	373673	408514	425767	425595	384193	425071	436940
	251	1.48625	8037	6407	64098	6314	7522	3805	6218	4392	623950	111665	2229	7079	10247	4141	3147	4764	4370	8990	4639	3826	6471	9117	8635	10853	16833	25486	39169	82566	172547	308179	316845	367168	404877	408426	375814	407650	431380	434683	385443	428119	436940
	252	1.4922	8301	3339	61878	6374	4757	3871	6106	4259	546659	112197	3476	5561	9302	3024	2856	3958	5169	8402	6009	3605	6182	7973	8307	11062	18148	25066	41095	87322	173594	309117	316788	377823	405693	412374	373823	416243	426564	431515	389784	419689	436940
	253	1.49814	5204	5971	60682	3474	7540	3830	5868	6894	466202	112718	2699	5836	9426	2902	3097	3507	3812	9668	4601	3840	6161	7991	9961	11114	16079	26615	39398	82470	169490	300370	318882	381489	398366	412160	369191	417462	430298	431532	382492	427835	436940
	254	1.50409	7745	3814	60580	6501	7452	6602	5994	4426	419176	112174	3362	5948	8947	3061	3030	3636	3822	8353	4531	4083	6104	7689	7987	10762	16967	27549	38963	83263	171974	310976	320020	378198	408151	409745	372365	419933	429260	431887	388926	425252	436940
	255	1.51003	4898	6170	57145	6548	7922	4197	3124	4445	379294	109318	6282	5942	8755	4155	3024	3709	3900	8293	4849	4324	5945	9879	8119	10617	16409	24614	39423	87520	173757	304138	314493	380247	409042	409161	376394	408701	430744	431358	392894	421927	436940
	256	1.51598	5156	3677	58320	3562	4718	3637	3209	6603	341252	105602	3107	5637	8500	3193	3518	3718	3795	8060	4716	3642	5904	9449	8247	10319	16178	26130	39889	87296	171676	309928	317006	386924	406664	402679	369572	415597	427779	431927	387823	430856	436940
	257	1.52192	7800	6662	51382	6395	7828	4166	3354	4139	312010	96797	3167	5406	8743	3162	3049	3534	3577	9229	4432	4039	6066	7368	8196	10466	16830	26339	38882	83312	173698	312257	311665	381191	401148	408818	374812	418472	432925	434585	389569	419924	436940
	258	1.52787	7497	4079	54607	3946	7706	5965	3508	7125	288174	87843	4067	8946	8237	3179	2929	3353	3693	7721	4450	5289	6018	7676	9835	11289	16703	29272	42256	82373	173054	310568	313494	382130	407649	407826	374312	423949	432452	438549	382239	419896	436940
	259	1.53381	5956	4033	53451	3490	6808	3685	6591	4634	268795	77808	6016	5775	7675	4276	3586	3100	3295	8926	6377	3717	6221	7751	10062	12340	16095	27109	41048	83182	173991	301282	317736	383633	407341	403130	371258	422766	434909	434041	385836	431283	436940
	260	1.53976	9943	4487	52220	3848	7620	6194	3794	4396	247510	62632	3250	6157	8516	3159	3285	3242	3908	7494	4822	3849	6227	9391	8918	10867	16458	26002	39638	85271	174944	302198	313940	381955	402486	405491	359754	417902	432211	425723	388273	422836	436940
	261	1.5457	11404	4448	48307	6432	7412	3795	3530	4437	227256	44799	3218	8800	11845	3324	2683	3602	3672	6830	4747	4154	6387	8186	10080	10658	18637	26135	40953	83322	174550	312213	323278	385462	406959	399359	375900	411245	422753	433720	392097	426656	436940
	262	1.55165	10413	7434	47792	4111	4640	3793	5993	4681	215219	30377	3446	6081	9276	3142	3139	4892	4123	6827	5090	4297	6789	8132	9833	11635	15618	28312	40968	85112	182259	312827	316889	384477	396250	411709	370571	419862	433903	434264	390034	431307	436940
	263	1.55759	10257	4757	49214	6486	5190	3929	3446	7335	200449	23667	3051	5973	8017	5952	3582	3479	5594	6903	6210	3742	8693	7448	7868	11139	16330	26212	42394	85785	177784	309729	315584	382626	401192	408012	370232	407754	425123	435399	388271	420104	436940
	264	1.56354	9969	4253	44546	6402	7131	6887	6546	4055	187622	16605	3673	5766	7907	4131	3277	2927	4036	6722	6410	5852	7931	8088	7968	11362	16762	27264	41729	87421	184350	314619	324691	381047	404553	402980	363179	419053	431656	432453	389384	417862	436940
	265	1.56948	7137	4630	46214	5979	4747	6835	6121	7172	175916	9470	3272	8875	7284	3882	5078	3215	4747	6337	4434	5706	9182	8205	9211	12877	17892	26696	41691	89139	178910	304456	313994	383962	400735	406906	372629	417558	432576	431425	387425	427708	436940
	266	1.57543	7191	7454	46604	3461	4417	6683	3954	4587	161805	7201	3401	5517	6955	6574	3785	3129	5023	6400	4687	4365	7577	7677	9008	10790	17455	26855	42978	84713	180122	306596	325071	386266	399404	403205	373982	420116	429460	435082	383067	425230	436940
	267	1.58137	10121	5027	44210	3579	5131	3821	6091	4394	150834	8667	3396	5782	9073	5988	4459	3451	5534	6089	4408	4477	9258	7386	8493	11285	17933	27433	41388	86421	180499	305585	326954	383254	407215	404075	368949	416944	420909	433610	391221	430798	436940
	268	1.58732	6961	8073	43674	3980	5402	3843	3531	4636	140575	7383	6378	5837	5882	3797	4084	3476	5524	7802	4370	4373	9188	9374	9025	10828	17862	29277	41280	92255	187562	306864	320154	383240	404537	402282	367960	410875	425615	432126	389007	421121	436940
	269	1.59326	9418	6327	42122	3578	5131	3480	3360	4330	137826	4698	3947	5479	4812	6045	4302	3542	5779	7787	4474	4855	8108	7640	8570	13088	17468	30666	41736	87800	180164	307987	323503	382946	403482	411463	368385	419920	428189	427192	387873	420389	436940
	270	1.59921	9959	11516	41533	6638	7944	4014	3850	4421	125497	7371	6223	5786	7627	6280	4244	4271	5676	5910	5965	3998	9767	8140	9269	11377	17978	30255	41367	86198	181621	303516	321684	374459	397365	412486	362648	423868	423570	421537	389252	420724	436940
	271	1.60515	10669	30992	41397	6683	4356	4033	3579	7368	118452	4621	3400	5650	4465	3733	3682	6843	5990	5625	6049	5732	8372	7994	9274	10780	17918	29464	42354	86797	179369	312146	320587	370150	399937	402396	371876	404437	422105	423265	386889	421010	436940
	272	1.6111	10398	55978	40185	6734	5107	3899	2997	4475	109850	4324	6084	5342	4893	6204	4465	3691	5935	5176	4769	4262	8331	7609	10152	10889	19912	27817	42008	88676	186019	307811	326583	385652	406806	414213	370344	416846	429545	434812	382237	425133	436940
	273	1.61704	9924	103916	38347	6706	4743	6709	3428	4751	105363	6947	6181	4825	6775	3361	6573	4331	5692	6004	4958	3924	8205	8005	7388	10125	17400	27833	41567	88600	181599	302587	316810	375200	408493	405616	373724	413848	420593	436605	382164	429758	436940
	274	1.62299	7112	152954	37912	6275	8184	4465	5904	7291	94264	7453	3720	4821	7109	3795	4283	3372	6311	5450	5296	4196	9099	7709	8407	11458	18294	27207	43943	90871	178907	314195	322028	384923	399302	413472	372262	416762	428025	431021	388778	420213	436940
	275	1.62893	10265	201024	38344	3518	5275	6800	5727	4822	88823	4788	6034	4197	4502	3955	4185	3873	6431	8827	5038	3798	7891	8140	8209	11457	17364	27030	43447	93966	190009	319070	322995	377116	402016	413534	373224	415715	429624	433685	385073	426958	436940
	276	1.63488	7208	242965	36496	7098	4678	3826	3487	7923	82193	3954	5930	4558	4229	3786	7360	3606	6472	6430	4792	4499	7670	7391	8375	11291	18487	26274	43855	88961	180900	313658	319003	378596	405916	405797	365018	409066	435835	426015	390128	430456	436940
	277	1.64082	7518	284021	36258	3953	5305	7170	3273	4988	77828	4435	3492	4470	4001	3672	11051	4044	6617	6474	5621	4461	8142	7764	8148	11560	17488	26852	45474	92590	187759	311212	320411	372549	403767	411955	363652	409774	427770	423749	386103	430857	436940
	278	1.64677	11099	313400	31931	3629	5370	7224	3455	7579	75669	6561	3090	6883	4131	3693	11366	3850	6050	6408	9306	4464	8767	8544	8095	13033	17100	27384	41135	92805	187913	318045	320884	381858	402254	416216	374786	412872	432542	436250	391876	428271	436940
	279	1.65271	7484	337258	29812	3809	7305	6558	6027	4907	72799	6212	5891	4350	6878	6456	10918	7697	9125	6517	9088	6419	8578	8240	8200	11260	17062	27872	42015	93319	189555	318823	322671	385440	408648	414227	366719	413146	437631	435770	386153	425677	436940
	280	1.65866	7782	353668	34026	6703	4834	4272	6585	7730	62330	4328	6290	6811	6688	3439	11183	4368	8339	5997	5541	5651	7896	7486	8431	11581	17571	26982	41948	93667	182210	315861	324285	383601	405234	412679	374979	418736	421942	425632	388032	433742	436940
	281	1.6646	8474	366544	32897	4273	7626	6690	3565	4888	61449	7024	3616	4735	4382	3884	14752	4412	8278	6272	5959	5627	9076	8031	7816	11378	19045	26666	43681	93758	189901	320030	321681	386978	407898	411412	375055	412011	434951	430471	386287	426048	436940
	282	1.67055	11863	376388	32909	6879	7908	6470	3463	4592	56511	7117	3360	7074	4085	4080	10168	4101	5547	8969	5357	5516	8644	7287	7374	10676	17031	26633	46230	93342	193465	318826	321732	373234	393920	409868	363652	412969	433293	430898	380139	431473	436940
	283	1.67649	11074	382930	30735	4232	5363	4289	3752	7579	48223	4138	5889	7403	7323	3558	10437	4588	5946	5883	5797	8165	9464	8502	8111	13001	16442	26326	45763	95059	187734	319275	318356	386663	405499	415040	372164	421621	430161	430351	386322	421123	436940
	284	1.68244	10850	390169	27878	4370	4711	4194	6183	7745	44401	6988	6068	4040	4240	6528	12238	6945	5273	9101	5606	8177	8995	10331	7685	11263	16108	26627	44529	92279	187785	312392	325503	386753	397158	415039	369723	411365	428717	435041	388236	434958	436940
	285	1.68838	7385	395224	29961	6985	4826	3921	3401	7435	42307	4550	6111	6506	7039	4011	24459	4229	5837	5369	8923	5423	12050	8270	7612	11537	16843	26167	43524	89803	190012	324730	318379	377345	409096	410367	366101	419620	429951	432557	387615	422405	436940
	286	1.69433	9936	386385	29181	4074	7957	4497	3634	5050	41780	4164	2956	4215	6847	4234	29114	5031	7916	5919	5948	5377	8930	7953	7903	11042	19395	26667	43301	91731	189613	319042	319311	373672	409196	413975	372468	418249	432830	424728	387228	427784	436940
	287	1.70027	9318	403552	25497	6745	5533	4136	3299	4477	39260	4285	3278	7401	4172	6183	30302	5647	5090	6501	5917	5019	9111	8195	7451	12927	17214	27402	42791	94815	198376	319865	321289	382607	405280	412369	374762	412152	423700	432238	379311	425335	436940
	288	1.70622	7053	401723	27506	6741	8012	3905	3356	4551	32358	4158	5558	6776	7110	4184	26104	8766	5246	6059	5688	8153	8901	8804	7632	11988	17674	27198	45405	92422	191152	313804	319089	379654	411472	410172	372207	420209	423568	434401	387327	420892	436940
	289	1.71216	9472	404268	22965	6835	7465	4139	3356	4958	33081	4221	3492	4286	4097	4010	29113	5266	5665	5942	8593	5100	8758	9191	7646	11264	17540	28361	43984	92296	197520	314262	322809	372516	407854	417442	375040	409332	431499	426375	382254	425933	436940
	290	1.71811	9537	409648	22945	6626	8341	7117	3145	5476	27555	3625	3796	4715	3803	4334	28627	5606	4765	9384	6294	5107	8432	10359	7367	11259	20093	29177	43221	93459	200082	316739	323292	373142	404975	411735	374490	422337	425624	432113	387065	427321	436940
	291	1.72405	10068	412218	22242	4115	5213	7124	3225	4859	28768	4280	3019	7189	6879	4284	24299	8415	5152	9159	6027	5014	9216	8973	7354	12361	19460	28250	45178	94106	198761	317949	318542	381788	401999	404334	369430	422747	420077	427399	380026	432334	436940
	292	1.73	6702	415058	22551	3993	5328	6836	6124	7625	27083	3743	6223	7252	4424	3989	22869	5225	4623	6160	6014	5422	8989	12183	8189	11837	19884	28605	45782	94763	191824	319805	320173	379936	404374	415894	376053	415158	426814	434854	386486	420812	436940
	293	1.73594	6874	409855	24510	6337	7604	6812	5898	5328	21270	3625	3644	4401	4283	3798	22888	5567	5468	6087	8423	4876	8656	8818	7771	11580	19123	31811	48852	95503	199075	306786	322193	381592	401528	412799	371094	416411	422451	432536	385016	429065	436940
	294	1.74189	7079	405377	23767	3966	5383	6891	3337	5042	20548	3803	6301	6737	4223	3583	16393	7612	4996	5777	6023	5280	9270	11727	7640	12604	19934	27286	46010	97183	202398	311292	314308	377941	405654	414729	375175	422859	430893	434205	379328	421486	436940
	295	1.74783	10400	416257	21117	6577	7783	7179	3443	5453	21134	7289	3599	4480	4154	3960	13843	7689	8338	6265	6475	4833	8464	11958	7635	11991	22147	30493	45367	97855	198387	318777	324292	384184	402330	402748	371803	419178	429472	420944	387234	430674	436940
	296	1.75378	10862	413578	22654	4468	5412	4335	3214	5811	20955	6659	3198	4285	6430	4480	14482	5180	4924	6437	5867	7690	8149	8864	7658	12310	19300	28924	45510	101219	210003	318790	322480	382627	401618	413742	373686	416273	430638	435960	382523	428099	436940
	297	1.75972	7474	411826	22599	4238	5394	6733	3385	6302	19671	6679	3151	4755	3554	4237	11657	7229	7229	7795	6145	7842	8064	8531	7832	12399	18323	28952	45455	99683	201172	315753	319511	382812	412078	412007	373620	426832	422164	423022	380253	433433	436940
	298	1.76567	10894	408786	18338	6670	4985	4182	3583	6085	15069	4142	3070	7096	3981	7508	15604	10496	9465	9201	8279	8438	11147	9355	7912	14202	17707	30902	46375	99666	203616	315104	322412	377980	400353	412376	375454	416017	431420	433096	388206	422406	436940
	299	1.77161	10251	412305	20551	6692	8032	3616	6149	10195	14542	4322	3397	5022	6568	9149	20258	12983	8706	12658	9910	8105	12374	8459	11805	11971	18607	29153	47696	100710	208017	324545	314672	381793	411876	418023	370880	420019	423392	426041	383641	431929	436940
	300	1.77756	10861	410170	22245	7173	8526	4187	3466	7346	13922	3789	6375	7171	4466	13530	17366	9752	9283	12351	9829	8039	13961	8259	8723	11754	18625	28391	46605	105187	204751	326884	321743	375762	411304	402958	376232	417479	424159	432525	388596	433248	436940
	301	1.7835	7149	411728	20261	3825	5752	3807	3430	7584	12634	3656	5733	7473	8793	13499	19508	9233	11530	9274	9193	8102	11978	12125	8576	12529	18613	28907	45394	100721	206919	316516	318186	376190	412646	411930	373255	412651	423282	430023	379898	420417	436940
	302	1.78945	6676	410879	19512	4299	8012	4122	3594	10060	15551	4131	5788	7310	7253	14149	16093	10367	9344	12812	9071	7082	11938	8882	11984	12343	18085	29241	46222	104081	206773	317695	326610	387698	402186	415790	371682	417035	427428	436694	377117	428687	436940
	303	1.79539	9922	409124	19634	4108	5733	7064	6139	9695	12176	3860	3119	5665	7281	12932	15990	9969	9054	9660	8580	7944	12129	8814	8327	12565	18459	29527	44646	99921	210725	325226	322849	385876	408325	413730	365256	415325	431461	432430	387354	429734	436940
	304	1.80134	11010	406546	15422	4066	5253	4348	3695	9240	14716	3951	3766	9601	7958	15498	15777	9809	8784	9858	8938	7669	14311	9658	8661	12310	18902	28572	47081	105362	207238	324803	323279	393068	408716	412282	373582	419544	431252	432470	384733	429518	436940
	305	1.80728	9920	407002	15448	3780	8639	3830	6118	9214	12181	4218	3360	11941	7744	14948	15835	10384	8523	9877	9193	10579	11776	11864	7895	12362	18422	29965	46791	104019	211889	326483	327738	375857	409557	413563	372847	418475	430413	435226	386285	421811	436940
	306	1.81323	10679	409921	16064	7027	5816	6632	5905	6266	11883	4149	3511	12008	7650	16175	16054	10054	9306	12225	9410	8001	11861	11626	12337	12978	17822	31354	46842	103199	208822	322963	325528	390079	414772	411079	376060	409916	430456	430119	377197	430079	436940
	307	1.81917	13424	407688	17472	6522	5524	6941	3193	8068	14434	3866	7197	13580	7715	15798	14399	8899	8610	9619	9505	8825	20165	11106	8414	12772	18975	29707	43875	97488	209976	319973	323875	388251	408380	417500	375537	420760	421704	435630	385667	430473	436940
	308	1.82512	12665	404802	14799	3858	8985	3902	3486	4813	13717	3929	9698	15028	10701	12425	14327	9383	12159	10108	9612	8518	19301	14666	8560	12280	18887	29049	44587	104641	207605	327000	326796	387031	411172	413575	375618	416318	427115	434750	386628	421701	436940
	309	1.83106	12595	407517	17140	3911	8847	6929	3401	7704	11278	3924	11356	12589	7756	12913	18075	9384	9602	9626	9444	8788	19353	15340	11366	12186	19170	29055	44008	99012	209303	329192	321896	390233	406290	407027	373981	419164	424728	433948	378598	427886	436940
	310	1.83701	9487	409460	16492	3866	5727	4020	3104	4727	11314	3838	11424	11934	10974	13137	14839	9164	9392	9171	9197	11714	23885	13126	10845	12679	19871	29941	45455	101622	206016	319112	331280	381282	410821	414517	365733	421493	429045	435072	388264	427058	436940
	311	1.84295	13220	404177	12892	3835	8753	7105	5578	7069	10343	5882	10955	12335	8230	13509	16861	12273	9771	9671	9436	12219	24807	14272	15404	12154	22783	29298	45383	104199	211885	320082	328864	390599	401523	411294	374131	418546	431067	435075	388450	422812	436940
	312	1.8489	9660	405005	13046	6496	8344	4072	2806	4259	13504	6983	10814	12807	7911	12364	17199	9035	10838	10051	9310	9571	22417	14354	14199	16563	23929	30434	47692	100704	210178	317095	327419	388525	409141	405103	373824	416618	424859	435407	381908	430196	436940
	313	1.85484	11943	403083	12494	4110	8276	3721	3635	4725	9956	4997	14219	14313	10663	13389	14205	10997	12312	12859	13144	9494	22623	13570	12312	12717	24638	31499	46002	104214	209670	330211	331885	384778	409657	401930	375049	418614	427608	434256	383679	430051	436940
	314	1.86079	9864	400609	15772	6461	8240	6493	3298	3861	10761	5534	10500	11823	8064	16097	17231	9242	11975	10646	11191	9104	23556	14075	12941	13105	24895	30394	47613	103872	206710	327161	327278	381734	409666	413138	375066	409574	430597	435152	387024	428799	436940
	315	1.86673	12476	400765	15271	6524	5505	4020	5357	4066	13855	5417	10933	11829	11160	12776	13474	11280	12921	10413	13004	11656	22748	14560	12711	15563	27490	30611	46235	102896	214574	324878	324691	375938	409883	415490	362665	419500	421800	425621	386629	417607	436940
	316	1.87268	9008	399523	14817	6397	5850	6998	5353	3778	9946	5123	10654	11574	7885	13018	14060	12303	13013	10363	12589	12750	21514	15150	12794	19559	22144	35785	45722	103228	210136	325729	323093	379104	406685	413405	372261	422823	419746	429013	387227	421425	436940
	317	1.87862	12802	398237	11961	6522	5888	6981	3340	6031	14038	5641	11611	12428	8175	12265	16725	10089	12365	12789	12938	12219	25375	14693	16335	16189	20654	33245	47856	102199	212089	325009	323777	386239	407109	414970	373551	419514	431371	435552	384644	414964	436940
	318	1.88457	9436	401495	11632	6590	7946	4062	3730	6375	10721	5905	11589	12601	11205	13311	14604	10180	12031	9983	9438	9099	22511	14609	17441	17085	21158	33195	47118	103050	218831	320884	328485	380771	410715	404364	374270	412535	427531	425688	385228	433024	436940
	319	1.89051	12344	400404	11091	4089	5936	6569	5788	3734	13461	5793	10922	11923	7693	12505	13566	10285	11214	11094	10355	9901	22397	14661	13848	17301	24925	33263	48183	103673	215754	319866	328391	387209	401124	408090	369673	421390	432046	421363	376609	420239	436940
	320	1.89646	9561	397438	13087	6378	6204	3925	3648	3512	10597	6146	12282	11949	6951	12900	14606	10708	10239	11209	10492	9170	23064	17392	12793	16836	22922	33651	49668	105388	224277	325746	317551	389700	409237	408516	376821	419560	423492	435462	385300	425309	436940
	321	1.9024	9101	393521	11204	6125	5949	4022	3464	6252	11058	5827	13069	11325	7780	12369	18931	13479	10110	9814	10566	9511	22835	14671	13141	17973	24017	34076	46439	105458	222441	322245	326192	389461	409051	413522	367918	419844	422417	433659	386458	430888	436940
	322	1.90835	12314	392704	10720	3763	6045	3633	4107	3821	13829	8193	15311	12561	7456	13183	15102	10190	10087	10253	10593	9854	22737	14839	12854	18938	23897	34223	50814	109207	219593	329907	325722	390527	410856	418106	372393	420738	431023	423859	386951	434055	436940
	323	1.91429	8802	394539	13383	3535	6504	4099	6621	3824	14220	5343	20015	11644	8383	12298	14304	12694	9418	10171	10376	10157	21816	14949	14056	18054	25046	33732	49454	109184	222582	329767	317646	390593	408661	404262	362777	413669	434049	427936	385379	424575	436940
	324	1.92024	12174	387707	10172	4074	6177	3874	6567	3303	13944	5494	19303	12451	7885	13109	16105	9883	9036	13391	13460	12671	26472	14246	13986	18050	24797	37840	49490	105336	224646	327208	323819	390948	409598	411457	368516	419903	427548	434996	386393	415436	436940
	325	1.92618	12373	392938	10179	3983	6584	6347	6385	5832	11339	5345	21703	12245	7282	17361	15187	9877	8153	9897	10714	12940	25714	15239	12852	17758	25734	38147	50069	108694	223108	330945	324711	388685	410098	412341	363864	422575	432557	434418	380404	428090	436940
	326	1.93213	9185	390044	12154	3905	10414	6257	3800	6375	13878	5534	24202	11935	7707	14386	14044	12748	9425	10536	10044	9958	22353	15299	13779	18621	27231	38363	55844	107782	225539	325193	326021	384568	411301	414324	375630	427572	431986	434058	382742	426398	436940
	327	1.93807	9611	386951	9176	3934	13015	6537	3918	3618	11492	8075	23179	14452	10409	17315	15922	12434	10220	10067	10846	11038	22449	14859	17162	18474	26361	38750	49813	109576	221123	326729	318139	386412	403957	404222	374519	412692	428707	424812	379245	421165	436940
	328	1.94402	12672	380583	9330	6620	18755	4592	4861	6282	11218	8799	23257	14597	11393	14007	14638	12576	9946	12102	12905	10064	21345	15703	12676	17874	28240	40228	51308	113685	225412	322367	327503	392264	403645	406564	366008	425116	428953	431452	387256	424371	436940
	329	1.94996	12103	383009	8771	3888	25906	3846	4864	4127	13685	6042	26305	14797	11704	13503	14509	10962	10109	12837	10857	10274	24848	15215	16723	18224	28885	39468	54479	115730	224773	328364	324591	395360	416178	405622	376979	414436	423767	427643	384669	426746	436940
	330	1.95591	9239	382018	8656	3823	33533	3624	8119	7226	10997	5682	22334	12406	8429	14602	14686	10373	10538	9823	10875	10043	24250	15224	14041	18122	31005	38859	53471	108932	223410	326880	327257	387668	413422	419358	364218	423936	428946	426548	382519	432587	436940
	331	1.96185	12254	379114	11902	6543	48705	4031	6293	4306	14009	5950	25487	14292	11734	14224	17757	9955	10634	13065	10724	12735	21168	14253	13206	19977	31677	38581	52256	108293	219980	327841	330680	396141	415964	405751	364348	415656	429066	430938	386858	425230	436940
	332	1.9678	9950	377224	8339	4000	63624	6547	9149	7009	11294	5327	23030	14314	8613	14148	14457	9701	11137	9424	10689	12845	21882	18113	15968	19245	34432	39390	55182	107748	218750	327774	328714	389051	402469	407370	375964	428469	431938	430787	378759	422852	436940
	333	1.97374	9310	374704	10890	3760	74566	6695	9277	4627	10169	5461	22394	14486	8872	13987	16720	10416	10737	10879	11499	13034	22236	15231	14604	22780	29454	40381	55050	116470	231216	334709	333713	386420	419693	424773	383953	435367	428603	429118	383966	429299	436940
	334	1.97969	12680	375904	7891	6133	79436	6146	8305	7799	10936	5962	24190	12276	11481	16030	17666	13634	11056	10028	10720	12153	21692	14899	13863	18947	32087	40874	55163	111121	221712	334204	325500	386269	423107	426175	379311	439829	429407	431545	392849	419443	436940
	335	1.98563	12621	373131	8713	3631	81006	3493	5053	5318	11651	8828	24574	12584	8665	13855	14411	10151	10962	10639	13754	9617	22368	15297	13887	18353	26765	40777	59875	115390	231664	337500	323953	397636	419641	427411	385490	439132	428140	429302	387622	429519	436940
	336	1.99158	12861	371889	10729	6618	86210	7151	5236	4860	11546	8735	22158	15581	12334	13951	15000	12686	10788	10289	11408	10318	22971	15639	13599	17924	26107	41946	54552	118383	235112	336590	324647	397665	412606	426867	393343	430197	418498	422968	386417	423157	436940
	337	1.99752	12877	369177	10220	7032	85518	6777	4620	4193	11160	5460	24212	12205	12366	13686	14780	9734	13044	10261	13085	9775	22904	14643	13631	17630	27242	39626	55322	119624	232698	342220	338784	391026	424781	426118	376390	429300	433217	432098	378258	421179	436940
	338	2.00347	12765	366273	10618	4148	81972	4215	6281	6953	10512	5998	20675	12756	12748	14341	16249	10231	10048	13340	13542	9484	22834	18256	13621	17912	26605	40054	56019	118868	239704	326675	333351	388407	410824	431343	388222	439076	432264	432212	384964	431042	436940
	339	2.00941	13648	371294	10159	6583	87281	6882	4015	4241	11547	6388	20494	12939	10316	13272	17756	12115	9770	10409	11036	9959	23135	15014	14145	21856	25652	39645	59246	116578	237254	329455	339947	391907	417760	428341	389278	437870	436133	431170	384787	424646	436940
	340	2.01536	10175	361525	10164	4104	85497	3654	4122	7396	12041	8239	19623	12655	9247	14199	17052	9434	10137	10522	14625	9879	23932	14572	13281	21514	25419	41769	56650	115383	244957	331927	341444	399055	417006	423144	389325	436697	426588	430146	378624	421880	436940
	341	2.0213	10019	361341	10622	3651	85708	3814	3946	4632	12788	5802	20194	12879	11986	14284	14701	10366	11967	10586	10475	9684	23241	16052	17123	18059	25891	38337	62703	114685	243365	335938	342628	396469	420070	428096	391997	440511	436122	431961	387282	429930	436940
	342	2.02725	10302	359727	6574	6573	83665	6533	4582	7276	17745	5563	19564	12828	9355	14702	13596	9942	11514	10053	10363	9323	25038	15292	16136	20573	30388	37755	61830	120927	246311	346365	340447	398615	419988	429437	392008	436706	436285	431074	387474	431693	436940
	343	2.03319	10003	354554	8939	6808	83906	3821	4450	3989	15709	5265	22956	16033	9541	14891	15952	13113	8887	10331	10391	9401	23043	14501	17637	18893	25390	41481	57694	117487	241780	346591	345047	399744	421931	417752	383022	435040	425301	428697	378074	430863	436940
	344	2.03914	9640	346554	6909	6079	80985	4321	4649	4284	20461	6161	24071	13105	9943	13798	13090	12459	8987	9971	14531	9935	25358	14137	14019	18529	25131	38111	56361	116925	237751	344362	341504	400799	419424	427959	393270	427478	436416	433295	382911	432941	436940
	345	2.04508	13378	351157	9115	3632	82832	3968	7408	4257	21389	6001	23995	13060	9271	17584	13581	10381	9307	13850	11341	9854	22319	14705	13887	18171	25896	42607	57951	123886	248501	343437	332729	394379	419696	415559	383258	447109	425823	430801	372408	431442	436940
	346	2.05103	13008	346065	7846	6562	81092	6398	4889	4248	18369	5658	20665	16184	9212	13730	16204	10311	9179	13301	14318	10419	21525	15064	14972	17890	26867	38373	57074	118383	239688	343231	340189	402361	413524	427199	391595	432225	432665	426267	377704	415324	436940
	347	2.05697	9621	330870	5556	3278	82800	3972	4961	4562	17631	8484	21742	13975	9874	14672	14128	10298	8940	9387	11630	12424	24424	15122	14241	17605	29938	36726	57630	119197	247108	337773	332475	400234	409578	429659	388741	441893	424756	431957	386017	433003	436940
	348	2.06292	13805	343258	8693	6674	74565	6428	5723	7008	19540	8606	21333	15764	12506	13636	13474	10327	9091	10026	14240	16347	23994	14986	14598	17300	26328	37226	59224	118081	244842	345161	339211	397106	421870	431020	382262	438962	425062	428083	382523	425633	436940
	349	2.06886	9301	344761	7784	4113	79294	3937	5302	4643	14082	6329	21888	12886	12177	13796	13423	10490	8822	9842	13686	29493	21740	14748	17318	18004	26793	37572	57306	120377	251395	340324	339686	389175	422279	435133	378347	427299	430553	431919	386202	431681	436940
	350	2.07481	12255	341769	8696	6682	79563	4110	5412	4401	14918	6378	21322	12944	12222	17355	13234	10182	9565	12305	11458	48912	21375	18954	14202	18537	26336	37435	56591	125682	250714	345014	340959	392063	421920	425654	389734	443769	424771	434998	381077	429708	436940
	351	2.08075	9464	336547	5517	6946	78364	6806	5023	4649	11664	7067	23711	16564	9916	16718	13352	10204	9469	12998	11781	87567	21328	14760	14257	18599	29406	41927	57683	122614	245739	339672	327013	390672	421316	430635	389368	440020	435364	428876	376990	431651	436940
	352	2.0867	12522	330485	5275	3814	79602	6768	7393	4485	9538	7544	21608	13998	12404	14979	13534	10350	11645	9857	11499	148352	21656	15022	17384	17797	28787	39192	62871	122084	250167	343113	339906	386088	422612	429621	390969	429628	425560	427763	385664	431651	436940
	353	2.09264	9028	321742	7876	3940	79262	3733	5275	4619	12857	7473	20457	13342	9992	15559	13807	9181	12200	13396	12057	236851	22334	19374	14004	18637	26773	42929	61536	121576	246872	335263	331175	395450	426558	417235	379329	440615	431918	423937	384677	431651	436940
	354	2.09859	12714	320375	7907	7061	79484	6810	7933	4967	9574	11089	20364	13785	10316	17052	13178	10045	8630	10089	13845	355953	22530	14522	14212	17977	25771	38520	61980	127422	256447	342925	336115	400228	416498	414153	392415	428191	431498	433381	386202	431651	436940
	355	2.10453	12506	310700	8053	7275	78483	6765	5324	5167	12675	10846	23812	12451	10666	15412	15339	10467	12008	13427	12143	502387	23893	15433	14941	18281	25741	38356	59132	128857	253119	338477	332410	392544	425312	429899	391381	434945	434025	423554	385855	431651	436940
	356	2.11048	11865	310242	8416	7120	78632	4185	5192	6143	8774	8222	20276	13178	10911	15058	13927	9680	8884	10578	11348	645721	20306	14501	14740	17983	29929	39434	63755	125208	257209	342567	339426	389037	421793	417748	393176	445086	434311	430979	378703	431651	436940
	357	2.11642	8574	304758	8439	7071	78262	4307	7719	11157	11437	8461	23491	13125	10034	16744	12711	9857	11886	10766	11922	809939	21973	15663	13021	19009	25226	43780	64885	129179	253603	347792	340406	398636	424173	428494	392011	443996	426966	431354	383344	431651	436940
	358	2.12237	8495	302502	5484	6544	80298	8028	7575	18295	9108	8369	19474	15259	10011	15181	15023	9438	9494	9698	14573	977820	21875	15385	13843	21694	26647	39127	60156	126767	249176	347898	339984	388841	415831	429937	383930	440755	431128	427978	383759	431651	436940
	359	2.12831	8368	295282	5259	4023	81813	7274	7681	29068	9239	7972	20743	14002	10347	17797	12507	9908	9257	10055	14943	1204247	20815	15671	13945	18625	29256	38353	59938	124752	259300	345295	342358	392929	410721	432932	394767	445995	434318	434148	379845	431651	436940
	360	2.13426	11351	292572	7954	3961	80738	4842	5149	49232	8764	9123	19703	14068	13277	17322	12442	9345	9434	12841	13985	1402503	21885	18958	18502	22352	27224	44230	59692	127888	260531	339564	341908	401411	422560	420525	391187	429661	428258	424660	372793	431651	436940
	361	2.1402	11315	290575	4930	7075	83863	5055	5344	81580	11606	8428	19406	14050	10370	17875	12613	9571	8926	10440	11417	1645097	20584	15757	15051	21886	26738	39808	59332	130007	253325	350060	344505	404395	413235	434485	391440	437946	432968	434158	382277	431651	436940
	362	2.14615	7972	284260	5210	3966	87805	4550	5693	113279	8466	12207	19216	12959	9978	15127	13140	13220	10021	9588	11393	1827441	24561	15994	14970	22747	26528	42371	61049	127719	251301	349335	343913	401609	414082	419372	383448	430710	429792	428036	386934	431651	436940
	363	2.15209	8394	277822	6117	4124	91317	4968	5122	149921	8884	11548	21273	13355	10165	14682	15183	9574	10111	13319	14477	2037109	21042	15642	14853	18536	26142	40156	59709	130766	262262	352623	336127	403542	422241	428289	389944	443983	432835	436962	383881	431651	436940
	364	2.15804	11545	275804	6200	7633	97281	5247	5515	179361	8433	11861	18996	13894	9948	14261	12645	10208	13886	10514	14872	2315082	21208	15925	18297	18650	26501	40596	59266	125994	256747	340383	335994	392154	425532	422163	393201	434657	429061	433205	385192	431651	436940
	365	2.16398	7869	271401	6768	3716	102663	4922	5371	201884	9015	8915	19062	16130	9714	17855	15778	9886	13845	10436	11070	2461097	20660	16194	18288	19087	26021	40957	60173	129250	257715	350136	341157	402391	412899	433370	383123	435394	425558	425876	380583	431651	436940
	366	2.16993	8451	264848	9714	3858	100119	7210	5305	211357	9741	8884	18559	16531	10278	14712	12126	10323	12004	12652	11389	2679318	22335	16178	15148	17886	26372	40500	62298	130506	265224	352020	348584	405111	424393	431447	394284	438820	431916	432544	385297	431651	436940
	367	2.17587	8515	256780	9370	6605	114054	4702	5540	219724	12243	11714	18388	12491	9847	17278	12757	9750	16006	12847	11617	2864448	25399	15873	18354	19285	27089	41299	67012	133885	257848	349908	350367	391869	422960	425916	385096	440430	429399	431112	379153	431651	436940
	368	2.18182	11193	256030	6486	6431	121049	7333	8292	226813	12878	8508	21889	13625	10113	17609	16388	9526	13039	10261	11824	3104172	21754	16718	15073	18077	27523	41103	66987	131017	262501	339014	347134	402536	427795	432114	390040	428161	423865	432180	381455	431651	436940
	369	2.18776	11478	249350	9760	6648	126993	4324	4914	230530	10126	11273	18881	13762	10469	14836	17230	9874	13395	12620	10884	3275594	25344	17438	15981	18801	27440	41651	60471	136543	265869	345641	348691	404765	414455	433222	386557	427951	432401	421715	385377	431651	436940
	370	2.19371	11029	242282	9461	4037	136426	5037	5552	230093	10938	8530	19023	17176	10224	18120	16431	9491	13589	9733	10273	3195587	22470	17823	20372	19709	28058	41509	62319	134004	257171	348342	351610	406498	413729	429488	395294	440427	424287	431139	385651	431651	436940
	371	2.19965	11374	241341	9293	4148	143312	4429	5560	228318	10614	9111	19227	14123	10306	17945	17163	10014	13763	10026	11297	2387386	22583	18121	17092	23331	28205	41097	62419	132958	258865	338095	352475	407200	425260	431290	394046	438964	437707	424511	385119	431651	436940
	372	2.2056	11261	239743	6400	4108	144916	7079	8187	231987	10129	8863	17758	13547	10672	14173	17935	9642	12159	10150	11262	1116709	22388	22123	19824	18900	32945	40586	67525	132032	268423	341004	341563	407316	412426	436082	393343	429059	435527	425406	384091	431651	436940
	373	2.21154	8332	224725	9542	4178	158695	6974	8601	240888	13434	12047	20937	14901	13680	14161	17592	13207	11937	10516	10999	306306	22785	20033	16766	18459	28247	41201	63462	132929	272171	334570	350485	398743	422645	432369	382957	432269	431307	429982	381191	431651	436940
	374	2.21749	11502	227667	7486	4060	169181	5347	5752	241905	10795	9078	20228	13570	13893	15460	19580	12125	11720	9940	10758	95470	23812	24711	15704	18622	31209	45919	61620	129166	273739	338407	343846	403837	426747	417729	396410	440292	421034	429348	385754	431651	436940
	375	2.22343	10603	222524	6726	4087	183227	6862	4756	243155	10493	9084	20996	14230	11714	15227	22384	9908	11081	9615	11182	52808	29500	23039	16122	18700	27278	41887	61681	136421	262092	337043	347312	403509	422101	428723	386884	431029	433319	433274	385471	431651	436940
	376	2.22938	11031	218157	9301	7021	197195	4528	8111	251226	10859	8981	18275	17225	12388	14678	21321	10316	10617	13218	10622	46514	33104	23270	15685	19749	27913	42182	65923	129477	275227	348669	337542	405982	414378	428981	394773	440840	432104	425640	379086	431651	436940
	377	2.23532	10893	215040	10143	7135	214598	4052	5514	252033	10545	8713	17871	14286	12072	15391	23959	13853	11522	10138	11695	45017	42140	24448	15896	19419	28153	41393	65609	131052	275172	337110	343927	410426	426325	429119	394870	442910	432409	432350	387692	431651	436940
	378	2.24127	7876	206086	6255	6363	237398	7708	6140	246994	14578	9098	17856	13566	12973	14470	24129	10671	14443	13649	11167	38609	50208	26232	17954	19546	27124	42887	62150	128628	269267	348573	335871	401045	422285	431269	382369	438508	429971	424959	386619	431651	436940
	379	2.24721	7810	195015	8977	6738	264865	7757	8185	251526	10771	8828	18166	13535	12850	15289	22240	10926	11346	10751	15424	35603	60783	30538	15557	19235	31420	43311	66577	135564	267000	348827	344709	404114	424935	417698	390013	440400	432827	423835	380200	431651	436940
	380	2.25316	10612	200159	9254	6770	288626	4971	7783	249476	11302	7953	20543	16085	15793	17988	24019	11001	11856	10274	11028	35361	59127	31367	17451	19412	27530	42435	63523	129894	269717	352892	338227	397971	425290	430938	388620	442370	434949	433964	380571	431651	436940
	381	2.2591	7669	194424	6111	6705	315580	5025	5200	246707	13568	9082	17642	15962	13990	14709	25284	10240	15050	10677	10806	36446	53088	27381	17407	23268	28006	44063	64453	132532	277181	354388	345224	407340	412763	433541	394365	428868	426912	426351	385015	431651	436940
	382	2.26505	7736	190052	9494	6776	333517	7152	5487	242284	11184	8935	17617	13983	17140	15400	29040	10334	12579	10970	14293	32187	46321	26678	13847	20005	27235	42827	67384	138882	279184	353647	339703	393294	416610	430488	396769	443822	434291	424723	375024	431651	436940
	383	2.27099	10881	184408	9461	6610	338894	7157	5514	244077	11435	7921	16911	14740	17289	18246	27134	10332	13930	10119	14541	32429	37952	26433	14519	19602	27109	43063	66432	133248	272687	356722	344257	404719	417271	431948	385846	431542	422440	427634	386773	431651	436940
	384	2.27694	11306	179047	6422	6835	334777	4366	5307	239522	14085	7857	20248	14733	14416	15069	29879	10923	17086	10088	11846	31320	30059	26229	15150	19873	29030	48392	67203	139066	272602	355861	344683	404016	416267	428123	381538	440555	427960	432787	387870	431651	436940
	385	2.28288	10494	173593	9028	7098	313813	4923	5967	239343	11651	7726	17445	15305	14511	14478	29578	11141	14358	13817	11255	34039	25948	24961	14123	19274	28322	44174	68181	135000	275134	352572	347518	397800	418672	432439	386881	440441	432834	431822	373907	431651	436940
	386	2.28883	10197	172123	5745	4294	282908	5016	5257	243792	14400	7631	17961	19300	16757	18010	34459	13612	14270	10362	15974	28650	23579	24481	17552	18932	33850	44607	67797	132350	283239	354354	346183	400050	427026	416136	397931	431612	425901	432085	387949	431651	436940
	387	2.29477	7371	167728	9530	3942	237193	5278	5283	246831	15241	8504	18284	18331	13519	18448	32049	13361	14649	10177	11317	33068	23788	20313	14708	19441	34770	47396	66215	135039	285058	344901	347613	401426	424249	429817	389563	443037	434495	429265	385128	431651	436940
	388	2.30072	7080	162672	9327	4626	187087	5029	6150	255067	12869	7534	18758	24666	14282	14597	37550	10398	14832	10695	16078	29393	22891	17448	15034	23308	36124	46088	64236	135511	277157	345190	339171	410019	416089	431017	392624	446900	433051	429041	382269	431651	436940
	389	2.30666	10659	155771	5941	7125	144920	5026	6137	253301	13286	8147	19044	39671	16702	14708	36730	13237	15668	10906	15731	28974	24183	18098	14571	23306	36668	45081	66212	138145	287271	345264	348380	408740	423985	428596	391400	430013	424716	425656	376915	431651	436940
	390	2.31261	10229	158931	9173	4056	109028	7302	5808	257357	16339	7652	18302	60322	13236	14971	40479	11368	15146	10646	15061	30180	24363	16819	15095	19949	35487	48901	69052	141984	289680	345757	345017	403267	425162	432382	383726	442622	420479	434404	380011	431651	436940
	391	2.31855	10382	161213	5471	4373	80416	4676	8717	270773	16257	7903	18447	105985	16369	16987	40096	11569	14723	13280	12666	27315	24194	15817	15831	20165	30425	46726	67912	144988	293278	347233	344753	408333	426978	429792	380500	442379	423208	430702	384421	431651	436940
	392	2.3245	7448	162440	9205	6663	55917	4891	8629	271650	13540	10992	20860	180566	14658	14096	41166	14473	14354	13390	12372	28749	27084	17497	18297	20810	29252	47465	65897	143755	281330	353867	339207	413498	426037	433656	393066	434625	427075	430861	385702	431651	436940
	393	2.33044	8042	157915	5744	4603	45847	4684	5651	277708	16763	7544	21419	290717	17138	14942	43901	11740	15667	10541	12643	31813	23599	19136	15570	21510	29368	48686	69870	146143	284426	347472	350093	411555	430115	418168	381652	444611	432056	437180	384162	431651	436940
	394	2.33639	11752	158231	9184	4389	36313	5190	5452	288237	12995	10155	17922	437960	17829	15858	49655	11898	15292	9881	12586	27118	23777	20186	14547	24821	30810	49807	64866	138655	291454	350838	347352	396366	423848	433039	384174	445579	419962	421381	377528	431651	436940
	395	2.34233	13820	152457	8622	7076	26346	4797	6054	291525	15090	7649	17813	616274	14830	15799	50847	11539	15652	10317	15476	29675	22134	20649	14785	19445	29714	51370	65034	138771	292871	347316	344728	407719	426758	431526	393275	441068	434947	423655	389505	431651	436940
	396	2.34828	15306	145256	6049	4367	26621	7148	5348	297861	16632	7425	17708	825037	18381	15838	54924	11628	14992	12921	13197	30270	22284	20994	15452	20014	32206	53290	70289	147491	293396	358976	337046	406512	414792	438966	393594	440809	422746	434263	383148	431651	436940
	397	2.35422	15493	137716	5706	4418	19441	4862	6106	308517	24559	9951	17539	1074294	30589	16017	63315	12843	14478	10969	12491	35575	24377	21979	15120	19675	32803	53685	66034	140695	294342	355486	351418	397691	413598	430581	394702	446358	434339	435155	384638	431651	436940
	398	2.36017	15732	133926	5740	6673	15998	7535	6131	309955	30593	8027	18961	1331522	71443	15438	62487	13025	18555	10922	15675	33337	25218	25233	15377	23819	33503	54611	66588	141760	296999	354669	342366	410216	418718	440262	391561	429558	431635	435986	382975	431651	436940
	399	2.36611	10935	128201	8638	7631	15094	7277	9162	314016	51747	10672	27167	1581517	108586	18694	67179	12846	17751	11218	16133	36067	21993	24612	14633	20530	33737	57267	67453	140565	295667	356940	342243	400735	416689	439484	384137	444731	426523	435336	389969	431651	436940
	400	2.37206	14582	121492	6526	7363	17384	4011	7261	313848	95982	7459	31024	1845455	112102	15023	73406	12910	14639	10339	14370	38744	20890	25637	15610	19905	32710	60878	67262	141493	296304	356183	343454	402128	424632	442355	395872	432188	433404	434622	382917	431651	436940
	401	2.378	11169	116828	8750	4476	13909	4328	7303	312745	168493	10292	28774	2092989	112762	18403	76836	12885	14576	13982	16549	41410	21954	28723	14653	19614	33208	56597	68779	140948	289882	352518	353642	401794	415718	452555	381495	442208	433559	429795	384932	431651	436940
	402	2.38395	14674	108022	8899	4950	16189	5127	7638	312420	288710	7959	30584	2277647	110083	18249	79857	16353	14446	11096	16352	47156	22493	30290	15302	20284	30102	57802	66838	141948	299934	350294	354012	408028	425052	454108	395534	445076	430718	431322	381175	431651	436940
	403	2.38989	14041	104745	5523	5019	11414	4379	10034	309122	462035	10132	33332	2281724	101142	15386	89689	14057	14772	13609	17175	53641	26599	31826	14121	18942	30408	56733	69499	142477	300959	345422	343890	402920	413661	476190	391498	447160	426426	432238	387114	431651	436940
	404	2.39584	10104	100987	5462	4889	15275	7640	10240	312341	686105	8105	34899	1918696	95772	17841	91205	12657	14539	12412	16693	58024	22294	35329	14953	20309	31210	56569	68048	143354	294029	357201	339456	393565	425049	463933	396329	440681	425038	439899	376603	431651	436940
	405	2.40178	12910	98307	8804	7523	11068	7901	9880	319003	955623	7746	33331	1261434	89589	15739	101212	12871	14250	13082	14560	66316	24326	40492	14745	20010	30648	53990	69156	152609	305103	354761	348849	396478	422767	482530	393817	433541	436241	438257	386655	431651	436940
	406	2.40773	14150	94218	9158	4844	15102	8225	10437	314088	1228776	10713	32909	623830	81509	17037	105754	15380	14481	15232	14896	79012	23535	39527	17997	24720	29941	55461	74518	151014	292942	345399	354212	405487	415014	465020	394255	443117	424362	431016	385611	431651	436940
	407	2.41367	13843	91199	5526	5007	13965	7837	7177	319453	1485494	7600	37939	270312	72096	20438	113151	14399	14954	16995	15520	89601	24422	44184	15786	21840	29527	61493	67991	151444	299984	345544	347020	405932	426494	462675	379834	443291	422881	434799	377317	431651	436940
	408	2.41962	13942	88738	8536	5153	14240	6922	7656	327202	1657083	7915	38938	132246	64403	22015	119439	15125	15353	18221	16041	96873	26474	49168	14763	22723	29276	56791	73815	149035	298347	360290	352418	396172	420287	454245	397104	442748	435497	425745	384426	431651	436940
	409	2.42556	9237	78679	5845	7045	13607	7624	7415	321354	1750418	8280	36246	86559	58371	24553	127135	15679	15717	21460	17586	108972	23975	56496	15442	22774	28843	57548	70269	145401	300511	361887	343617	407899	413115	456075	394305	440458	438867	426726	386929	431651	436940
	410	2.43151	9988	80061	8925	4839	9363	7344	7610	325053	1751474	8011	42659	69205	46882	24381	134910	15641	18868	23653	21046	118909	23577	60047	16988	24040	31927	59328	70909	147415	299674	349969	345849	411596	425323	449344	394554	445367	428077	433439	384601	431651	436940
	411	2.43745	12999	78601	8516	7917	9157	8535	7331	332363	1609167	7740	44499	63427	37031	28133	145024	18548	16096	23737	19425	129195	24507	69352	14802	28128	29841	59504	71774	152172	290023	354248	352362	407294	425223	452530	399366	443075	427499	432821	387726	431651	436940
	412	2.4434	12073	75683	8910	7723	9569	5281	10413	337474	1391572	7866	41928	56511	30680	29585	150380	19596	19801	24339	20113	143627	27747	76837	19195	24202	29436	59742	71826	152129	293398	357476	354446	403359	427256	439426	394017	444285	421718	437236	379683	431651	436940
	413	2.44934	12319	72874	8898	5012	13043	5374	7805	358873	1158660	11387	46751	56054	27656	29799	148308	16658	15238	26025	22508	150578	24752	89642	14961	27663	29466	60247	74239	153355	302643	353908	344852	395530	424414	446800	397354	430874	432674	429606	381688	431651	436940
	414	2.45529	9144	70951	8656	5371	12380	8862	10028	383845	955471	9111	41105	51208	21865	26510	152190	16314	15623	27862	23321	152502	24454	102830	14834	27220	28765	62410	75127	154712	305785	361052	353901	398705	428399	438182	387017	432714	426836	431731	382412	431651	436940
	415	2.46123	9485	67763	6138	4695	13116	8090	10105	417032	833982	13696	41917	52363	21908	27158	158698	16987	16831	27093	25211	150858	24516	120428	17208	23972	30632	61896	71393	151971	295369	360378	352498	408087	415412	432077	399152	445311	423150	431986	387473	431651	436940
	416	2.46718	13043	67110	5513	5278	8299	8502	10045	462508	777755	11571	42808	46716	17083	27009	157217	18140	16445	30053	29071	148988	24627	142451	18043	24697	30047	60338	70384	147957	295245	357865	353495	409262	422432	440264	395575	446088	430052	437038	386255	431651	436940
	417	2.47312	12701	64100	5268	4880	8394	5340	10016	541743	739555	14504	41936	42647	15590	30827	159496	21196	15940	28903	31549	144154	25627	162514	18554	25228	31785	60712	70315	152621	302347	349160	352815	408541	418746	428898	385062	434500	430034	432859	390084	431651	436940
	418	2.47907	13502	62689	8890	5502	8873	8481	6567	657239	717060	12396	40799	43878	16346	32860	155048	19001	15882	29384	36210	137442	25306	180427	15214	26013	30659	60400	77566	149596	306569	356884	350345	405606	427604	426884	398514	444240	421217	431646	385387	431651	436940
	419	2.48501	12484	56452	8495	4543	13638	8412	6832	806210	670378	16120	40670	41696	15863	31781	155362	20067	19647	30480	40583	121342	27845	208301	15507	26218	30385	59650	75362	152976	306063	358369	343369	398996	433250	439883	402248	443913	432991	434461	384102	431651	436940
	420	2.49096	11641	53578	7794	4869	14287	8052	7130	980121	598838	16088	40660	41009	15190	32738	149900	21321	17368	33170	44275	108823	31501	231025	17165	27424	30590	59777	72559	156715	311622	358937	352553	406576	422165	438570	400194	431546	429409	424413	388533	431651	436940
	421	2.4969	12674	56580	5280	6999	29215	8753	8686	1211258	517030	13261	40889	38982	17994	34754	147933	21534	20186	34997	54203	91968	28854	260255	16553	28229	29614	64631	74960	151964	307053	358152	352164	407952	427746	422845	393197	437358	432627	432801	381296	431651	436940
	422	2.50285	12384	50163	8393	7290	36595	9183	6561	1436658	431518	13182	38320	37737	19026	31437	139015	21730	17340	39401	61643	75976	34434	284201	17320	28246	28391	61426	69734	160207	304871	348099	350352	399894	434841	431740	383421	443812	421691	434805	390625	431651	436940
	423	2.50879	8576	52007	5700	5424	44974	7295	9318	1670264	356926	12915	40241	37295	16896	31623	123691	25435	21430	43822	69646	63125	37347	321880	17502	28122	28545	63065	71977	152376	312629	351940	350095	409676	416603	435373	386130	438811	431588	431407	385200	431651	436940
	424	2.51474	12297	47182	8179	7500	53519	7370	6874	1913784	296230	13842	39765	36042	17867	33513	109489	25913	18469	42430	75666	57354	35712	356525	16816	27336	29945	58088	70433	158220	302523	359779	355137	396339	429226	438790	385439	444547	428003	432015	375807	431651	436940
	425	2.52068	12350	46058	5525	7889	54561	7127	9347	2166028	236066	13373	34838	35855	22867	31690	99031	22635	19336	48561	87946	49355	39678	392859	18297	27842	30417	57333	72001	153827	297912	349201	345381	405134	430784	437719	389874	441615	429914	427045	388901	431651	436940
	426	2.52663	13522	45146	5480	5025	55007	7808	6909	2410004	186177	13412	35178	35888	19004	32670	84171	22929	19038	48787	104699	39037	43783	428606	18579	26443	28606	58087	75523	159510	311035	359294	344247	408108	417978	442262	396349	445869	425617	421668	378754	431651	436940
	427	2.53257	14178	46710	8305	4531	53579	9927	6686	2680122	144615	13017	33021	31195	19799	35541	73583	23227	19739	56163	119195	35779	52179	467615	17670	26371	29981	58903	71404	154047	297012	352312	356104	401273	427162	425890	398721	444251	426640	430688	385788	431651	436940
	428	2.53852	11140	44749	5634	5200	59046	10362	9583	2915833	116708	13450	31472	27603	22161	33360	62054	24772	19545	56487	142715	29152	53846	492693	18509	25044	29240	54279	71551	158030	299328	363778	354275	407536	419327	435073	396770	443556	429814	420569	385171	431651	436940
	429	2.54446	15974	38579	5338	5233	63111	10557	7012	3147867	90365	13169	31214	27817	19925	32751	52670	23766	22790	62446	170382	26044	66281	502479	16958	25676	29256	54275	72432	155993	308205	362555	352367	399018	428231	437588	387470	447133	428498	433701	385261	431651	436940
	430	2.55041	13223	41491	7598	7482	64978	7854	6277	3310970	67250	13746	28282	23323	19403	33761	46628	24083	20147	62200	199621	23269	69496	501983	17060	24336	29743	55059	71225	159320	311658	360093	347213	395064	436705	435793	385766	446774	433113	435005	386165	431651	436940
	431	2.55635	18237	40401	5228	7496	63717	7921	6691	3516193	49809	13789	30011	24919	18659	33666	39702	25231	20825	65703	243803	21094	78671	485112	17477	26375	30453	58051	73748	154224	299377	354991	353692	408651	422514	434538	394743	434062	431978	432647	382283	431651	436940
	432	2.5623	18386	39687	5371	4778	65472	7558	6815	3680850	36417	17856	27276	22809	18738	36501	31117	27222	21471	69587	294128	21048	90272	439652	18044	22919	29329	52357	75900	158098	308926	359756	357184	399009	426014	436096	399204	442879	434406	430519	379534	431651	436940
	433	2.56824	14721	38314	7917	7454	69146	7707	9294	3847182	31630	16478	23740	22098	21026	33933	29058	25595	21453	70681	353267	20717	101624	382906	16657	22635	34133	50723	75566	162196	304414	365302	354375	405468	430489	425642	396667	433202	433761	437377	377781	431651	436940
	434	2.57419	14310	37231	8587	7689	72585	7993	9457	3886532	30394	14508	23089	18738	18736	36675	21202	25391	24569	74258	415712	19297	113139	311779	16467	21852	29617	51062	74618	156017	305690	364746	351837	408461	427506	425529	396598	443726	432492	435423	384422	431651	436940
	435	2.58013	16136	35043	5788	7776	78515	10543	7032	3722752	28619	16197	21369	21007	17998	33455	18899	28463	21953	75172	476956	20802	130698	237072	16445	25128	30798	51545	81436	159370	304573	366759	358991	407068	420157	436311	388960	445321	425052	432001	384011	431651	436940
	436	2.58608	13854	30131	5651	5259	77135	11448	6317	3269046	31788	13668	22242	18814	17559	35689	17749	26215	25389	79440	543208	21262	146243	176546	16927	22541	30233	55019	77411	159510	305792	355620	354733	408725	418080	426750	398333	446691	429067	435899	383359	431651	436940
	437	2.59202	12032	34363	8115	7293	82179	10428	6400	2487737	28607	13183	18722	17954	16770	33022	18337	25535	23952	86122	617644	24026	173854	130482	15915	20755	32337	55126	76227	159664	316138	354292	350248	404698	429979	429529	399082	436819	423372	432926	386919	431651	436940
	438	2.59797	11626	28655	8002	7757	83282	7362	6701	1722145	29196	15920	21181	17131	15778	32590	13328	30029	24339	84240	682621	22473	197809	89854	16198	26279	33208	51261	76945	169086	306832	361342	358011	408686	423990	433541	389513	439158	422718	437874	386281	431651	436940
	439	2.60391	12368	26175	7838	8214	87067	10702	9543	1160675	29861	12301	17159	17858	16259	33500	13403	28024	27945	90247	754022	23327	230765	61937	15323	21259	37228	49684	83499	159153	313609	368514	344517	402184	419157	436700	400484	433167	436463	435376	387791	431651	436940
	440	2.60986	9243	27340	5054	7497	97332	8481	6819	847595	30406	11179	17512	19057	18915	34654	12140	27246	29359	91740	805163	26789	263584	44811	16349	22028	33695	52768	79244	158964	313762	368768	352620	405352	429944	437100	389693	434237	431296	433113	384713	431651	436940
	441	2.6158	11387	25642	5447	5257	100820	10827	8850	676957	31354	11874	19900	19418	16326	34971	12425	27373	28791	88868	846424	24373	299320	34595	16183	21572	33109	51079	78161	163127	315181	357487	357662	407998	428041	436407	401350	432018	434284	433633	389623	431651	436940
	442	2.62175	8207	26162	5203	5214	100720	10196	6434	572001	35992	12805	17301	16530	17142	33469	12773	27863	32479	89980	875177	27156	337257	28783	16841	22644	33137	51890	81898	161107	310158	355489	348886	392205	430499	422537	390449	427387	430869	439469	387905	431651	436940
	443	2.62769	10520	24585	6314	7772	113585	7660	6308	500570	37782	20252	17602	16384	16158	37010	12574	27584	29095	85712	877390	26354	366900	25313	16033	20667	31968	51133	85086	162730	308488	366346	353601	394586	419037	434371	398900	426964	422209	435155	387526	431651	436940
	444	2.63364	7805	21838	4474	7970	116431	12036	9321	431966	35384	30404	17013	16286	16699	31560	15753	31599	30530	85866	866132	25124	400259	21623	16746	25209	31225	51997	78489	164055	304718	354968	354871	410920	432689	435481	386692	439149	422796	438079	386998	431651	436940
	445	2.63958	10486	21347	4199	7157	122551	8324	6655	389179	39679	58053	20352	19210	16697	34752	13208	27267	31798	75361	824517	24708	439797	19681	17214	21908	31660	51603	77925	163260	310165	354541	344570	408143	428993	434281	400174	438236	424920	432015	383331	431651	436940
	446	2.64553	9746	22368	4225	4701	123305	8317	6819	343035	43015	111109	18201	16884	18002	29705	12244	29078	36297	66291	754220	25375	475773	18292	19511	22448	30561	54469	84882	169142	310263	363538	355580	395381	431770	438606	392147	443157	423098	432811	378892	431651	436940
	447	2.65147	7671	19726	4302	3814	134891	8645	9323	314190	45735	188910	20144	18863	17421	27816	14504	25352	36755	59852	649081	24999	502547	20980	19114	22374	30137	63946	83972	162377	319462	354320	348303	406612	433607	435790	398010	442117	432825	434166	388334	431651	436940
	448	2.65742	7561	19394	4589	4258	141597	11040	9327	275644	46716	301658	17358	16203	18116	26006	15552	23725	35337	47249	528907	25589	539449	16444	15441	27134	30455	98547	78662	165230	314966	364843	343976	398601	431073	436550	398172	442145	420367	423501	389005	431651	436940
	449	2.66336	8157	19163	5966	6172	143609	11325	6452	246474	53048	429287	18574	15380	18046	24242	12327	22339	40126	40136	400452	24549	554405	15796	15848	26826	31389	161489	84256	167797	310212	353573	346981	405978	428120	437191	398290	442600	435863	426948	376630	431651	436940
	450	2.66931	6863	21262	5748	4613	152876	8819	6754	204413	51767	574438	22325	16238	19502	21974	12337	21091	38111	36168	285203	24868	578801	18426	15846	25442	31248	246044	81157	174925	309757	359257	352631	406189	422164	427424	400489	441842	429125	436185	386574	431651	436940
	451	2.67525	9632	19871	4556	4675	163430	8627	6364	171038	57992	721530	21592	15409	19071	20322	15398	19197	37166	27739	197793	28479	583219	18571	19450	27971	34720	258947	79152	167916	312276	356424	350688	409442	420606	425894	387658	444137	426769	436803	384483	431651	436940
	452	2.6812	9626	17491	4547	4583	169944	8174	6788	131674	56873	850342	21769	18442	18893	19849	12538	17199	37664	25845	124658	23200	577479	15160	15990	25347	31012	226865	78092	170971	319557	354817	355959	406330	433825	439488	397386	442677	430537	436004	381060	431651	436940
	453	2.68714	6881	16991	4269	5930	183256	8152	9595	91457	54552	963100	22747	18239	19774	22919	13147	17161	38242	22440	78474	29030	556150	15274	19718	25855	30891	158950	79553	169022	311596	365955	354619	412705	433866	439961	390656	443580	420104	435317	387235	431651	436940
	454	2.69309	8938	18063	4273	4821	194657	8140	6794	61976	55937	1072187	23187	15752	20060	22289	13701	15752	41933	20557	54082	24314	511290	14775	20361	26932	31513	113714	77302	170424	319994	366699	355310	413068	420386	428548	400208	443518	434003	436668	386786	431651	436940
	455	2.69903	8815	15619	5721	4593	201202	8074	7409	36615	61605	1174290	19847	15949	19838	19731	15948	17956	36911	20126	38299	25145	441922	18041	30012	25701	30838	91205	79246	176621	318581	356815	352184	408393	423781	435412	398784	442777	424830	434500	386370	431651	436940
	456	2.70498	8329	16743	4093	4676	215685	9442	6324	24854	62278	1265199	23652	16703	20631	21176	14339	15270	36163	21756	25525	25428	363167	14227	29937	27719	32201	77189	77647	176455	321239	368091	347649	399693	438987	428086	400553	441691	433278	435024	379783	431651	436940
	457	2.71092	6991	14949	5414	4905	225943	8708	6497	18634	61865	1364149	23737	19092	18926	21600	16740	17377	36396	23292	24434	25241	281219	14898	26656	27957	34091	71148	80563	167948	323683	370294	347649	407797	430964	436495	398511	443977	427738	439617	379481	431651	436940
	458	2.71687	6942	14427	4338	5858	235681	8819	6726	13285	64920	1464886	23855	19776	19490	21463	14063	14825	34979	24526	21078	26052	202603	14060	23340	28812	37498	68656	79995	172015	324276	357262	349505	410688	431637	438770	401352	432203	434057	431453	386514	431651	436940
	459	2.72281	8646	16841	4871	4480	246350	8796	6817	13691	69372	1534944	22092	18540	23595	21773	15681	15322	38927	25642	18300	25449	142041	14816	20383	29448	38539	70359	78445	169668	316122	370666	354206	413107	430720	426851	388664	442631	436489	441730	388893	431651	436940
	460	2.72876	6342	15142	5185	6128	255714	9631	6816	11786	72313	1588219	23271	18678	20127	22941	14372	18418	35544	31387	20790	25858	94040	14261	21701	28880	34158	65062	80214	176916	315655	363319	355092	399555	420880	440447	401082	446665	433434	436240	384984	431651	436940
	461	2.7347	8415	12940	4301	5261	269076	9031	6175	11166	75542	1666121	25077	16307	22570	23939	13917	17285	36799	30679	19630	26133	61089	13905	20523	29406	34669	61924	81119	175392	320302	362770	348906	411574	420229	441404	400918	447134	433623	431666	387428	431651	436940
	462	2.74065	6330	14615	5674	5119	273768	8792	6523	12482	76741	1704945	25614	17582	23186	25353	14955	18738	37055	35391	17317	25732	41864	14402	16641	30018	38072	64734	81493	170268	319968	370686	353117	401866	424158	438562	401934	440803	424620	433043	377294	431651	436940
	463	2.74659	6696	12467	5832	4789	285293	8937	6400	10696	79979	1755940	23801	15721	20651	29833	18011	19367	38472	36264	15940	25628	30481	13668	16279	33079	37979	58807	80378	168835	324452	373545	356736	399182	432405	433127	392753	434169	439220	425367	384199	431651	436940
	464	2.75254	8385	14878	5514	4791	304710	9769	7671	11716	83809	1815073	24938	15996	24133	37323	16612	20110	39681	39914	16240	28763	24634	14761	15868	32884	39474	58451	81626	172395	311805	372441	359166	413970	419180	436209	399285	445216	432119	435625	388757	431651	436940
	465	2.75848	6039	13986	5455	4989	311680	11759	6713	10881	87573	1854487	28760	18743	23684	41735	16320	21489	39116	43264	18777	28526	20812	13656	16871	32164	35308	64587	82563	178718	314192	362127	347461	412829	427801	428336	390342	438776	430436	426114	388563	431651	436940
	466	2.76443	6277	12121	4512	5365	326803	16980	6657	10776	89841	1914250	28267	15715	24581	49261	17202	22118	40717	47483	15158	25502	18336	13410	16252	29557	34358	59846	81712	172833	326549	363397	347502	402622	428900	436751	397480	434515	425144	435076	382985	431651	436940
	467	2.77037	7940	11932	5677	6711	332104	19822	7040	10808	93795	1938040	25574	15639	21494	51524	21895	22703	41012	49576	15390	26383	17743	18273	16522	29262	34473	58157	82288	172964	324777	367617	358998	414247	429937	436854	391569	443976	426240	433677	386712	431651	436940
	468	2.77632	5801	12826	4348	6051	335966	19756	7506	12162	96122	1939638	27136	15602	21962	48223	19620	26474	43765	56718	15068	26249	20321	18277	16529	32068	35017	58995	86836	183950	324150	373333	351083	406667	431971	437935	399574	439412	433631	434522	389195	431651	436940
	469	2.78226	7664	12532	5706	5040	336091	17843	6145	10352	99217	1922665	26428	16912	22676	56628	21190	25220	40698	64067	14903	26806	20269	16822	16201	36467	38587	57327	82716	176477	321197	372495	360361	403362	429479	437513	388474	446752	421861	422543	383520	431651	436940
	470	2.78821	5746	11694	5348	6092	337094	16873	6932	10560	104331	1898525	29052	15574	21260	52681	27052	26058	42493	69934	15447	27794	16882	19480	16711	37091	38400	59356	83070	179202	328436	370427	348572	409786	416748	441274	400260	446212	427257	434429	382020	431651	436940
	471	2.79415	7860	10902	4170	4799	329849	15774	6174	10624	110643	1900135	26961	15224	25032	54568	25829	27209	40599	76802	14979	26391	20430	21480	17235	33371	34223	56853	81605	178746	330458	373730	359609	403794	430572	436264	400050	442863	427645	437627	389053	431651	436940
	472	2.8001	7110	10929	4442	5830	324707	14363	7932	10219	112157	1912338	29519	15129	20739	57344	29249	28139	39352	80417	15277	26375	15575	21773	20415	34551	38255	58323	87259	184547	330123	378070	356860	412969	429300	437163	398949	444187	435567	433137	379163	431651	436940
	473	2.80604	5587	12945	4219	4763	313066	13859	6491	11708	118398	1912775	29158	14110	20495	62729	31894	29633	35955	86492	16102	26510	19225	20250	20772	34212	35671	61209	87885	181007	345213	368085	357176	403819	424809	433440	403431	447148	433080	423158	382341	431651	436940
	474	2.81199	6109	12468	4317	5649	305122	13946	6331	10144	122645	1911859	28425	14506	21454	65356	31157	31639	34723	97091	15248	26491	16501	18872	16271	33548	34516	55427	85020	181213	342175	367315	356913	413728	428887	434521	395438	442599	432489	428335	386608	431651	436940
	475	2.81793	7601	10246	3993	6969	302792	11990	6224	10694	126971	1889710	31350	14248	20913	62621	33858	33769	34015	100491	15484	29745	15578	16852	19796	33240	38453	54492	85714	180972	361294	384182	355453	413116	427713	428739	388337	441368	432304	434071	383740	431651	436940
	476	2.82388	6744	12025	4014	5189	289648	12068	6652	9922	129076	1881524	29745	14649	19836	61412	40671	35199	33619	109714	16204	26193	16072	16723	21715	30798	40008	54586	84263	193035	369210	381201	348299	412703	430671	423034	400334	443732	431216	428930	382681	431651	436940
	477	2.82982	10569	11872	3979	5038	294490	12504	7164	10728	131920	1849694	30108	13500	20917	67050	36048	36480	32882	114799	16173	28401	16320	16274	16779	35292	34295	55563	86124	192471	378939	382364	361670	411653	430636	438536	387936	447639	429705	431317	379452	431651	436940
	478	2.83577	24196	9721	5352	4926	292196	10575	6259	9029	135483	1824981	30526	15800	20352	64504	34894	43181	32787	115214	16247	26652	16553	14876	16871	31504	33147	56053	85077	190232	385425	377132	348378	408056	433211	433298	391437	445450	437115	433417	387139	431651	436940
	479	2.84171	47850	9736	4585	5093	289333	10497	6568	9364	136186	1803557	30154	12890	21751	68390	34539	41413	34156	117632	16785	27327	16984	14461	17027	30255	33597	58079	85049	184159	408000	377682	361018	413622	434495	425086	399721	433853	421160	437914	384014	431651	436940
	480	2.84766	87278	10141	4093	4993	274275	10801	6573	8826	137645	1812771	29994	13259	20578	69377	35427	45860	35071	119468	16961	27145	19113	14087	15807	28266	37890	52283	85830	192467	421814	381467	359680	411568	432426	436075	396571	436544	432932	428409	378412	431651	436940
	481	2.8536	136903	11209	5686	5044	272217	11595	8014	9382	133356	1801021	29158	14143	21477	66245	36642	48459	38537	121152	17588	27516	15886	14709	19522	28552	34150	59243	90614	191667	431545	377024	363312	414419	436293	436871	400509	445539	424109	433019	386231	431651	436940
	482	2.85955	186039	9680	5485	4743	270823	10544	8416	8935	137509	1794592	31367	12110	22331	70375	37578	53267	40561	118474	17778	29050	16375	14253	17401	25779	33695	55134	91822	186315	434924	381364	357799	415344	436579	438548	396430	445604	427962	432741	378951	431651	436940
	483	2.86549	232362	9843	4472	5147	258538	10025	7855	10090	135903	1780160	29755	10671	21528	70729	39167	53783	43399	110188	17376	29354	16485	14605	16722	26619	34019	53405	92191	184743	425178	377969	360219	400769	433800	431798	399613	445403	423842	433362	386433	431651	436940
	484	2.87144	271648	9206	4378	6275	242008	10830	6290	9079	136612	1745550	27666	12337	23070	70430	34888	58527	47010	103933	17311	34996	19016	14295	16071	26152	33098	53509	88646	184920	409068	378033	350973	415443	421181	428309	403102	447468	434284	433272	388411	431651	436940
	485	2.87738	303331	8759	5745	6581	236168	10531	6952	8280	135891	1718775	28563	11039	23377	72399	39123	61734	49491	95572	18054	31473	15737	14333	16841	24076	36118	54046	93118	191400	383013	374373	362273	408864	418323	440798	391378	446583	431528	433012	379630	431651	436940
	486	2.88333	314514	8735	3811	7071	219421	11372	7282	8285	131898	1705233	26770	10234	22719	69066	39115	65488	54729	80189	17583	32530	17022	17609	20383	29131	46152	55842	86385	189171	383361	386506	358787	417296	432194	440914	392418	433483	435451	423865	387879	431651	436940
	487	2.88927	343651	8799	3971	6803	204302	11135	8742	9447	128824	1719012	25388	11109	24884	69229	35990	69738	58773	69983	17203	32717	16571	14028	16433	24284	92075	54240	90863	194592	362189	385109	350188	414077	419279	442456	399801	441914	430716	424153	386038	431651	436940
	488	2.89522	357197	8149	5045	8168	188560	11072	12315	8532	124986	1715718	25221	11129	24421	72400	36348	69885	63594	53666	16087	35349	16345	17819	16729	23599	217738	58226	89772	185117	362491	409525	359184	410593	421856	433742	402094	443437	431949	423796	386977	431651	436940
	489	2.90116	378395	8160	5719	7027	173407	11850	18128	10006	121255	1704135	25240	8955	24110	70933	35918	74858	67316	41569	16270	37167	17388	15199	16935	27277	400231	54189	86339	184251	357186	444961	360254	416654	424433	441386	390756	436455	431092	431613	380689	431651	436940
	490	2.90711	383723	7974	4178	7383	153591	10704	29078	8470	113803	1729684	23091	9378	23769	71851	38793	77320	72048	29562	16450	35533	16805	15248	17504	24416	565572	55109	92307	192031	355993	480544	359439	407845	432263	441845	399540	443415	434539	425922	381108	431651	436940
	491	2.91305	385521	7838	4536	8603	136911	11361	49528	8281	103470	1772335	22732	9061	24530	73611	39035	78981	78266	24942	15396	36074	16855	15445	17652	24842	609030	59877	88089	190893	361538	532951	361625	411915	435242	438552	398935	441761	433118	432055	389963	431651	436940
	492	2.919	395111	8310	4404	6776	112100	10624	67008	7744	95413	1815570	22693	9383	25286	76214	36522	85168	83307	20217	16586	35504	16918	14370	17101	25430	490490	54587	91715	197122	363365	579608	358588	396559	422935	429354	402301	446586	421101	437142	389820	431651	436940
	493	2.92494	400219	9288	4021	6950	97346	11083	90248	8436	91472	1875139	22931	8981	25933	76352	38167	85072	87484	15651	17411	36268	17756	14812	17428	29188	309234	56248	93729	191930	376849	630034	362429	403304	433370	441304	401092	443190	432842	429531	386185	431651	436940
	494	2.93089	401949	9196	3918	6703	88809	12061	114413	8445	82305	1960160	21248	8727	25175	75227	36878	84878	93238	13395	16781	33914	16889	14604	18976	25825	176471	56674	90421	199982	379900	653073	364784	412205	423886	442056	397891	430602	428238	435919	389180	431651	436940
	495	2.93683	404428	7573	5264	7766	67752	10484	125651	8978	76247	2048450	20268	9309	26464	67514	35147	85377	97533	12264	18013	36456	17197	18643	17182	25280	117994	57777	88511	194575	384274	644583	356254	400869	435631	439885	400160	444213	432452	438462	378379	431651	436940
	496	2.94278	407892	7983	3703	6829	64603	9489	135605	8412	70276	2143985	19970	9241	25946	64687	38001	84045	98296	11646	17508	32389	17181	14583	18365	29320	83861	55533	89803	194101	379571	623049	354727	414133	434069	425919	402974	428020	422531	431164	387869	431651	436940
	497	2.94872	404814	9644	4578	5866	47597	9681	146786	8662	65538	2129937	20137	9540	26368	68611	35466	80398	103903	11451	18367	31411	18530	16068	18773	29113	65388	61762	88902	199339	394065	578829	350701	414290	421548	429002	401439	435002	424315	431522	378992	431651	436940
	498	2.95467	406727	7859	4624	6807	47945	9413	148988	8923	56503	1964824	20074	10771	28848	73944	37845	76885	107481	11894	18497	26575	18497	16424	21311	26222	59500	62217	94395	206902	397354	551433	355686	414055	432316	436039	399952	444690	430511	434600	388505	431651	436940
	499	2.96061	409071	10237	4234	7820	41804	8715	154537	8375	51160	1621040	20514	9401	28175	78357	38098	69526	110456	12367	19969	24738	18951	17824	18478	29963	49089	56528	97092	199703	401915	505605	356426	415675	423503	439965	391088	444272	430024	424462	385996	431651	436940
	500	2.96656	408354	7606	5498	7182	30077	7719	158949	8322	46130	1142806	21907	9684	26581	84980	41548	63765	113337	12236	21839	22206	22197	16975	22604	26838	46707	59611	96091	201004	401891	480232	359882	408401	425061	429424	390990	443056	428023	432833	386509	431651	436940
	501	2.9725	404343	8494	4190	7937	26908	7675	158323	9249	38077	709278	21361	9640	28377	90294	41379	58737	117909	14088	21721	21136	20380	20670	22706	28969	61915	58159	98225	207884	419146	455370	358892	404973	432856	437608	401091	443317	430401	430985	386669	431651	436940
	502	2.97845	407691	7432	4033	6543	23573	7210	155512	7759	33834	393547	21359	10810	29062	96459	45668	52355	119552	12621	20600	19473	23058	19069	20382	29498	115098	58575	93323	205081	429662	429006	354154	414610	422952	426226	403943	431732	423000	435135	389781	431651	436940
	503	2.98439	407253	9053	5816	6619	21475	6884	164366	8727	28926	216035	22162	9166	29599	107497	45720	45783	122446	12416	20882	18383	24569	18091	20871	33855	251972	59377	91795	206326	441679	424560	357718	416157	431936	424738	401806	443908	433972	432536	392841	431651	436940
	504	2.99034	411829	9096	5505	8485	20590	7917	163862	8279	23687	137399	21486	11861	30700	111950	49280	42114	123050	14615	22133	18918	25682	19304	22624	30853	484655	58153	96431	208199	460683	421713	354745	414384	435264	427903	401216	442336	429102	425044	387254	431651	436940
	505	2.99628	414215	9300	4197	6660	25079	7763	163704	9918	19311	100491	22469	11074	30929	121083	49823	36404	123568	13709	23699	18546	28663	19202	24971	35851	699894	60338	99739	211161	460902	417112	357730	407805	436339	438402	400062	442033	432117	425937	381571	431651	436940
	506	3.00223	416609	7763	4399	6564	24816	6333	170048	9784	16832	82182	23377	11580	30822	130694	51175	32026	114740	13579	23710	16689	32552	19033	26890	34872	756835	62931	94211	216578	460584	417490	359212	407042	421463	440593	401071	448003	429900	431889	386472	431651	436940
	507	3.00817	412410	7009	3543	6685	23400	7631	169791	8237	14824	71190	22572	10996	34700	137092	49697	28615	105057	14402	26457	16920	37594	20279	28370	36729	605339	65215	94603	208042	448394	414961	353772	414545	434989	430295	406184	444302	432119	433726	380211	431651	436940
	508	3.01412	413914	7502	4982	6798	17073	5923	169683	10254	15254	63798	22204	10370	31370	143738	52847	27328	92808	11800	24823	17761	35671	20352	32201	38736	362822	60991	100365	205103	449486	417335	363975	414971	432024	440715	401802	442866	426260	431937	390137	431651	436940
	509	3.02006	411218	9230	4424	6902	22477	6359	173406	9224	14086	60153	22685	10866	27501	149127	51203	25462	80810	12707	24584	16746	39324	19939	36506	42294	204530	61306	101636	210966	415217	402551	363441	415700	434859	441451	390613	445751	426630	433580	388346	431651	436940
	510	3.02601	413193	8921	4263	7534	17087	6097	174209	9269	13430	54906	24205	9936	26381	163341	51544	25923	65865	14502	25036	15870	37762	22705	45500	44183	118703	65022	96589	206809	412713	410415	356333	417065	436113	428654	401774	443660	431319	435963	388178	431651	436940
	511	3.03195	415056	8489	5382	8028	22285	7639	178518	9189	10955	51752	23609	8720	27435	171782	52504	27121	53798	12684	27646	15417	37501	25314	51690	49449	84149	63206	96928	217326	401152	405674	362134	416077	436053	440688	387552	431924	424650	430273	391933	431651	436940
	512	3.0379	412240	6753	4207	6997	16634	6436	180719	10432	11820	48299	23469	7206	28976	180331	53361	28962	40203	13516	30401	17155	35609	26441	64290	52078	70189	60113	103762	214647	384490	392147	366117	415161	426308	443698	391077	449710	424429	429950	392260	431651	436940
	513	3.04384	411320	6729	4445	6950	21435	5959	180292	12658	10376	45416	21253	7795	30910	190503	52206	31694	30511	13849	36182	14899	31524	28816	76379	60088	70242	61202	97371	209668	391092	395829	365436	419361	424886	430188	393516	445601	424768	432274	391072	431651	436940
	514	3.04979	409198	8246	4233	6748	16227	7260	180535	14781	10579	43217	17556	7426	32500	195438	50969	31032	22158	13935	42455	16971	28308	32692	97011	63739	60753	60798	101527	209143	393719	385306	370781	407524	426082	430181	400045	434628	431249	429139	387600	431651	436940
	515	3.05573	410229	9204	4236	6760	21557	6021	180363	12759	10525	43701	16508	7243	32366	201225	50069	31912	15850	14616	44800	18112	24021	36256	117231	70092	56074	60571	96770	216556	401937	392896	365216	407104	433938	443744	390186	432452	435733	434930	389900	431651	436940
	516	3.06168	407621	8141	4727	8354	22590	6594	180307	14415	10576	40697	16251	7804	36453	202229	49767	34337	12920	14975	42742	16588	20509	37172	146699	72432	54921	57634	97690	209902	403713	395592	362069	417492	432262	437786	402711	446329	429256	426936	391524	431651	436940
	517	3.06762	406631	6958	4408	6619	22582	6218	182377	13517	11180	39193	17763	7757	36849	209344	47455	36474	9147	16191	45720	12155	17466	39028	179401	75125	52922	61755	96609	207415	420214	392656	355207	410463	438641	441009	397027	449011	434326	431386	387152	431651	436940
	518	3.07357	411856	8933	4145	6768	23231	6572	178966	13181	10448	36530	18219	8929	40216	213953	45433	37014	7432	16003	45082	11264	16474	40072	217719	73378	51323	58808	96994	217304	422241	390741	362124	416417	438271	433450	401397	445276	435354	423021	390097	431651	436940
	519	3.07951	408926	6513	4203	6186	23980	7385	178866	12589	10162	35922	17801	8002	38938	220486	44124	40016	7132	17650	44868	11387	13791	38118	247831	64565	48777	60105	95983	210084	420049	380054	352232	408466	427780	432692	389338	440621	428105	425768	392140	431651	436940
	520	3.08546	406541	7235	3915	6634	18876	6006	183226	13105	10412	34086	17527	8258	43253	226419	45740	41534	6540	16825	47836	11312	10446	35899	275260	57610	49469	59438	103760	211639	415216	391321	358357	418035	430792	439055	390656	442499	434224	439491	389672	431651	436940
	521	3.0914	405808	8486	4674	6776	25799	8827	185840	13622	10094	35146	17953	8536	45522	228336	42393	43309	6930	17707	47373	12282	9406	31857	287564	49825	51000	61160	102384	219490	397178	389229	364357	412375	421793	444131	400974	437706	436780	425395	383543	431651	436940
	522	3.09735	401821	8010	4228	7663	25346	5944	188453	13141	9894	32955	18209	8098	47777	230023	45976	44280	6435	17133	47444	12474	9193	26697	280458	42480	46736	63838	96893	211065	387321	378722	366967	404948	427993	432506	404840	450068	436778	436129	387532	431651	436940
	523	3.10329	399574	7346	4069	7626	25488	6714	200779	13532	10846	32305	16896	8293	49536	231844	45080	43841	6171	17107	49479	13748	10831	23829	255828	38461	50067	64652	100060	218787	365912	385868	362467	412853	438471	443431	389651	430719	429342	432248	381922	431651	436940
	524	3.10924	388123	6860	5063	8208	24394	6967	201660	12612	9303	31542	16490	8664	52144	233459	46358	45038	6503	20492	50030	23427	9391	19521	222800	31662	49679	61265	102368	211178	367892	389026	360999	414593	425496	445257	389996	438162	437541	424715	379770	431651	436940
	525	3.11518	400000	8051	5824	7605	19163	6785	206719	13755	9035	32757	17121	8848	55369	235582	48257	46612	6011	18700	50734	54152	9138	16436	177956	27896	44785	66775	101044	213247	350661	379996	355934	404130	437673	440524	401444	446252	434197	429014	382306	431651	436940
	526	3.12113	399560	6384	8438	8188	25828	6296	206860	14342	10300	31479	13780	8879	59167	230948	53955	44108	7390	18580	52271	100587	9055	15366	139725	28551	43986	61813	99109	214694	348054	383275	356522	414548	434495	434047	400836	445054	433802	436149	377967	431651	436940
	527	3.12707	395341	7087	7314	8280	18545	8210	206563	19767	9760	31456	14268	9309	62795	223514	57148	46530	5605	18099	51671	129823	9130	14080	108501	26226	43836	61338	104603	225662	355803	371357	364790	415227	426172	427996	401401	435758	438206	437979	380437	431651	436940
	528	3.13302	397225	6093	7970	7288	19967	6529	201068	20152	8726	30311	13324	11151	67833	205943	62114	44858	5185	17333	53465	150479	9096	15722	83824	24706	41466	67841	101013	216947	341923	384731	360716	420384	424547	440596	393642	445885	436461	425094	384110	431651	436940
	529	3.13896	399903	7775	7915	7999	19000	8456	195131	22345	9868	30059	11247	9631	69098	191324	62428	44196	5964	16025	53538	163641	9185	14959	70770	25783	40666	67322	101420	222343	349958	386267	366321	416836	436931	437787	402665	447311	427419	423846	381723	431651	436940
	530	3.14491	396159	5863	8012	8092	25516	6794	192883	22579	10809	28357	11534	11180	71526	169754	67724	40842	5834	14593	52379	185457	9608	16641	65791	25104	39466	62962	101249	230308	343346	381693	356478	404445	436739	431088	408093	443002	424738	435128	387022	431651	436940
	531	3.15085	396173	5377	8298	8231	25613	7903	184902	21743	9102	29303	10228	10190	75403	143138	70906	39060	5864	15501	53916	200518	9563	17534	73132	21889	41691	66715	103141	222121	343885	384890	362692	410365	436616	439214	405221	451426	435624	440213	382668	431651	436940
	532	3.1568	395075	6477	8126	7872	27050	6983	180708	21764	9489	28926	10276	12013	76892	115594	73849	36074	6801	13547	56568	212226	11534	18773	81286	22748	40396	63498	101682	222575	344968	384531	354450	405048	435637	432186	395253	439531	427943	421220	385708	431651	436940
	533	3.16274	387923	5936	8958	7961	20133	6852	180987	20930	9901	27392	8118	10665	79710	89725	81153	32695	6643	14190	56622	214452	12436	21861	97432	24116	39769	61908	104274	232252	345443	383996	366257	415186	424346	427630	406939	442101	423849	437032	380197	431651	436940
	534	3.16869	386464	6444	8637	9268	25921	6375	182200	21355	10650	27210	7974	10360	83429	67099	82443	28221	6154	12760	54141	205289	13662	26614	118373	24103	36944	62791	103433	228782	346481	384365	358950	408058	432378	440851	404145	458689	435537	432551	385637	431651	436940
	535	3.17463	385319	7303	10193	8023	20003	6816	183211	20650	11844	23206	10364	10641	80956	49149	87135	25742	5721	11635	51591	190429	14097	29587	140012	26366	36890	60086	108572	232455	344009	375769	364925	408786	437734	437939	403735	463559	425896	429257	386318	431651	436940
	536	3.18058	386739	7796	8274	9412	26274	7014	181126	21472	12347	20427	12948	13066	85797	34160	95462	20978	5675	14401	48907	170999	15132	31122	161178	26565	36996	62876	103672	224424	340430	377276	365303	412900	421244	440083	390390	465482	435459	432589	381781	431651	436940
	537	3.18652	380967	6049	8623	9830	19475	6506	180084	21146	15217	18614	13282	11017	84221	22976	91679	16657	5566	11565	44779	144087	16240	32065	181066	30356	39214	62225	103516	229672	337737	384795	365839	416331	436711	440863	394312	461235	435467	427052	384331	431651	436940
	538	3.19247	377678	5992	9892	10096	24630	6570	177713	22114	17158	18791	10860	12487	86449	16418	101381	13919	5261	11435	43262	117928	17962	33469	187153	30228	36323	63332	102401	224145	338725	376987	368075	422878	424047	439753	403144	472236	434685	433890	386935	431651	436940
	539	3.19841	376166	6682	8875	8664	25801	8273	180436	20448	20134	18080	9830	11109	91222	12412	97408	12998	5624	13404	37012	93230	18629	32316	183044	28948	37458	60949	104789	224304	339933	385722	369707	417564	426758	437546	401682	475993	433534	427700	383615	431651	436940
	540	3.20436	377316	7372	9457	10749	26239	6327	178254	22238	23739	18302	8090	11968	85946	11444	101592	9863	7057	11292	34581	73904	18416	29631	166498	29978	36434	62467	106548	230532	347737	383401	367132	406187	435222	440881	398828	470483	426832	434201	386832	431651	436940
	541	3.2103	375351	6103	11017	9069	25234	6406	179443	21829	24017	19692	7024	12032	88726	9900	102516	10445	6412	10782	32601	56468	17968	25543	147960	29265	36508	62329	103172	231112	348815	385096	367937	419516	428839	435455	399602	462603	425749	434187	385990	431651	436940
	542	3.21625	373237	7595	11599	8825	27360	6737	179113	22114	26180	17636	6565	11977	86920	8404	101596	7775	5731	10689	32866	44729	17354	21678	119691	28712	36951	62515	101578	226406	350760	385894	368853	418121	433220	436543	395404	460210	428606	433976	384783	431651	436940
	543	3.22219	372297	7402	11368	9402	27003	7075	177688	23139	25387	18153	6112	12302	85775	9353	103967	7051	5210	10817	33036	41910	17108	18342	96499	26999	35763	59903	98956	231287	349222	377920	360164	405237	432434	431522	394964	439646	433045	433158	383961	431651	436940
	544	3.22814	368946	7658	10219	9727	25856	7218	179092	24403	22748	17547	6074	12941	82246	7792	101234	7423	5506	10613	34172	41775	15050	15986	71908	26015	35116	59940	100696	228506	352380	383964	360210	411752	418808	428413	385941	449771	433125	433432	385154	431651	436940
	545	3.23408	365971	7279	11143	9947	25585	7216	182463	26558	21820	18667	5643	13311	82163	7828	100173	7447	7086	10518	34718	45498	16369	13922	56323	24709	35805	63180	96740	232825	341121	377351	353186	398867	425150	420620	393669	444648	430222	428438	386296	431651	436940
	546	3.24003	360630	5502	10260	10122	27058	7436	183407	27026	19817	16468	6135	13418	78461	7688	92558	7152	5740	12315	38644	49686	14785	11788	44972	25294	34849	64750	101559	234410	348780	374316	360607	400192	426128	429387	385564	443290	428976	424848	392233	431651	436940
	547	3.24597	357108	5595	11916	12043	26515	7578	184334	28149	19643	16441	4323	13278	75528	7493	87212	6968	5597	9726	41210	49007	14416	12749	36556	23181	34593	66939	99752	233597	347510	383142	360152	401227	416579	422554	395534	428847	432399	432731	385861	431651	436940
	548	3.25192	357769	5890	10021	11566	24983	8180	186751	31126	21210	15742	4530	13123	71946	7773	76204	6943	5882	11484	43152	48315	13519	11018	28952	22893	35182	71272	101906	229861	349626	374841	357617	403628	420740	427832	392235	434869	422486	425107	383445	431651	436940
	549	3.25786	353342	5800	10372	10349	27673	7617	179922	32115	20220	16910	5793	13534	69429	7288	66224	7456	5739	9731	45529	47853	13352	10750	28371	21354	36399	65450	99576	236362	340988	373173	352472	396044	416448	427119	391418	436334	428052	428598	379356	431651	436940
	550	3.26381	351221	7329	11509	10261	21043	8273	179848	35272	21586	17092	4495	14438	60795	7445	56265	6350	6511	9223	49826	45194	12868	12633	23851	21089	45879	65395	105571	231073	348269	371050	357570	397562	420669	431131	392658	435481	432064	421814	386165	431651	436940
	551	3.26975	353426	5679	10466	12353	27404	7295	184743	36834	20121	17666	4694	15194	53785	7774	47024	6520	6699	9732	50221	43855	13863	10587	22946	20588	61687	63138	101904	237131	347294	381064	361186	402043	424954	426992	390106	436415	434239	432596	388450	431651	436940
	552	3.2757	348046	7123	11116	10216	26940	7103	182731	36426	21537	14933	4703	15324	46250	7302	36041	6848	6256	10972	54129	42882	15162	13171	21910	20581	109248	61321	98252	231912	350623	381175	358853	402546	421240	428930	397890	433304	431893	421667	387256	431651	436940
	553	3.28164	345107	7471	10847	11086	21741	6718	183828	38244	23198	14977	4415	16234	39181	8224	27790	7398	5313	9986	55353	38672	16889	11480	21148	20663	183449	62297	101585	233237	342526	372579	354938	408464	422125	427757	396469	436908	423516	430955	388114	431651	436940
	554	3.28759	344735	5703	10701	11090	21847	7623	182924	41353	21605	15421	4034	16778	32404	7755	23466	6799	6342	11351	58538	37499	18023	11349	20913	20440	238230	61539	100205	232248	346731	379653	362622	404448	425452	427616	404571	433803	427993	421903	384936	431651	436940
	555	3.29353	339322	7667	11942	9984	28444	8324	181191	41975	21798	13631	4750	19147	26365	8113	15707	6563	6826	9271	58894	35652	22439	12269	21013	20099	234020	60569	102926	240061	348573	376689	348449	402139	422254	418201	395467	423142	423827	431246	388407	431651	436940
	556	3.29948	337520	5119	10527	11211	29919	7813	182522	42099	22517	14903	4676	17433	18800	9254	12496	8380	6426	9416	60838	31411	25215	12196	21391	20245	182462	61891	102442	234078	337357	379186	352935	399442	415969	423679	395839	426056	430258	434690	388240	431651	436940
	557	3.30542	337633	5459	10347	11354	22104	7588	181777	44023	23121	16260	4187	19064	14432	9838	10820	6432	6207	11001	58850	31890	29995	13271	22953	20405	112734	62102	103923	236782	350927	377805	356544	399244	420063	420913	402858	431025	427778	430883	387075	431651	436940
	558	3.31137	334989	5739	10064	12931	28920	6610	188546	45726	25035	18033	5554	19118	11770	8328	8052	6981	6263	8834	57030	31868	36940	13742	22991	20356	71635	62363	103918	237936	342267	376983	355193	407141	418676	430226	400389	432239	429202	431571	389463	431651	436940
	559	3.31731	318447	7430	9700	12413	22427	7982	184269	48044	24300	19878	3658	19434	8667	7907	6685	6686	7540	10355	51985	30934	43400	15006	23807	20668	51759	60611	105486	231926	336905	377531	350353	407387	425438	430755	390875	432332	431961	431542	389845	431651	436940
	560	3.32326	323728	5261	10297	12645	30262	8954	185728	48948	25251	22767	4208	21760	7342	8340	6013	7202	6040	8817	47191	33250	51460	16965	26056	20833	45134	60469	107926	240584	344075	376889	363040	399558	421767	431195	396872	430744	432899	421607	380534	431651	436940
	561	3.3292	321847	6850	8807	11715	30100	6992	185499	50766	25419	23525	4462	22383	5845	7791	7742	9046	6222	9448	40897	37697	60988	19723	26218	20907	41539	61406	107748	232003	343829	372389	351978	395109	426829	429106	395772	431124	431420	432510	378072	431651	436940
	562	3.33515	318254	5484	8773	13037	30693	7915	182875	54050	25409	23901	5413	22627	6022	8117	6724	7401	5754	9256	36564	42379	74599	21630	29619	22594	40713	65018	104271	234436	342558	370042	349996	396720	423023	419847	392258	430361	430238	434219	378072	431651	436940
	563	3.34109	322807	5986	9191	12357	32914	7573	182376	54221	27693	23688	5552	23404	5985	7787	7906	8035	5794	8757	33166	48903	90287	24341	30295	22335	38157	62998	103530	238629	343244	375820	360169	407366	421524	417777	395251	430175	424689	429497	378072	431651	436940
	564	3.34704	318908	7440	8380	13909	33131	7904	186845	54834	27292	25943	7354	26998	5514	8541	6042	8932	6293	8751	29664	57429	111524	31614	36113	21503	39510	60929	104637	237914	344619	374000	353659	404730	425029	429999	392035	421063	422848	434933	378072	431651	436940
	565	3.35298	315170	5752	8732	15128	33134	7338	182310	60978	28925	26985	10450	27119	7133	7926	5903	7533	6186	8846	25273	67270	138297	33442	44432	21093	41220	63878	104520	240204	348980	368916	360352	407561	422492	427812	390586	433029	435163	429854	378072	431651	436940
	566	3.35893	310628	5822	8881	13691	33867	7844	180106	59087	28591	26084	10896	28576	5231	7538	7235	7226	6212	8645	23464	77066	172301	36169	50313	21390	38506	62894	106749	241221	346295	372934	360492	405620	422653	421245	386271	431544	430114	432408	378072	431651	436940
	567	3.36487	310525	6018	11676	13140	23702	8014	176658	62783	31259	27945	13751	28936	5804	9065	6104	8798	6135	8352	23849	86108	211961	37613	63513	21884	36497	62802	104637	246635	357412	369087	357426	406010	424547	428280	387984	430973	428520	425103	378072	431651	436940
	568	3.37082	310596	5593	11297	14203	30656	7717	167965	62552	31370	26662	14447	29692	7180	8376	6307	8038	7959	8516	18057	88409	258800	39315	81387	24109	37946	66564	107241	248464	362279	379840	350276	405770	422804	429591	391042	430662	434734	430977	378072	431651	436940
	569	3.37676	309823	5369	10303	14552	32310	9572	146071	68007	34912	28529	14705	30756	5813	8282	6810	10066	6221	8531	12941	88855	306986	38332	105522	22781	39539	62755	108452	243928	373968	379386	351625	404192	422051	428471	396892	429142	432342	435862	378072	431651	436940
	570	3.38271	305744	6681	10084	15706	24907	8891	128308	70794	34331	28160	16213	33201	5726	9197	6551	10053	6297	8284	10910	87419	364041	35025	128998	25017	40246	63219	109257	242961	409684	377155	361834	402507	423121	424472	389314	431633	435051	433536	378072	431651	436940
	571	3.38865	301690	5379	10219	13959	25611	8565	96794	71662	38152	30617	18520	35037	5324	8100	6180	9573	7999	8627	10575	76908	410401	32500	170590	23400	37821	63845	105713	249266	458969	381244	360679	401598	420266	431283	401346	429711	430329	433363	378072	431651	436940
	572	3.3946	299094	5637	11922	15875	32898	8324	73712	76351	36559	29178	17534	37068	5696	8935	6272	10443	6815	7499	12066	66284	461522	27173	219398	23168	40809	66492	108433	248814	514899	373526	350883	398371	416364	426177	404670	433604	434709	429205	378072	431651	436940
	573	3.40054	301300	5179	10536	14838	33608	8135	51816	74764	38481	30298	17318	38144	6884	10021	6677	9557	7359	9998	12252	53952	512054	24714	274836	24595	36827	63793	108326	244505	593619	378941	361985	405740	425317	430570	400835	427493	430056	435909	378072	431651	436940
	574	3.40649	300540	7421	12766	15629	25697	7714	40429	81469	41543	32182	18933	41313	5176	9117	6719	9281	7376	9592	10750	41604	563583	23400	334879	29240	37336	63667	112133	246457	687720	380160	352881	398753	430058	426369	396663	432615	428230	429267	378072	431651	436940
	575	3.41243	298404	8807	11358	14837	33844	9751	30894	78857	41913	37212	19224	42729	4989	9017	6770	10344	8931	9184	11774	30703	586592	19333	407446	54787	37469	64652	109005	248345	791566	372963	362041	395126	428945	425352	408718	420541	433429	427177	378072	431651	436940
	576	3.41838	295348	10104	13783	16131	26853	8518	26625	83460	42112	45655	17405	42550	5244	11150	7074	11549	7634	7973	10998	21658	599945	19944	502850	119451	38083	64590	109765	249996	888028	380253	364087	405216	425430	426541	396301	431651	434552	422535	378072	431651	436940
	577	3.42432	295380	8924	10950	17869	26725	9502	25590	84603	47158	50044	16356	46979	5052	8494	6464	10300	8715	8404	11510	15793	595798	21432	579375	225336	37373	66011	108776	253952	953731	387224	357592	403653	423716	425941	397195	430694	427111	430298	378072	431651	436940
	578	3.43027	287963	9440	12940	15241	26643	8077	25820	86487	45779	52291	17490	47629	4876	9534	6173	10913	9901	8406	10972	13850	559242	28041	641115	324025	38073	64619	110009	248641	981602	378412	358208	408989	431626	427370	404955	428897	434954	430300	378072	431651	436940
	579	3.43621	286186	9318	11505	17974	34240	8004	26453	93518	48134	49654	16399	51098	5047	8702	6900	11021	8489	8328	10418	11166	497351	31092	666919	391033	36977	64423	109969	251096	981979	388026	364621	400796	433756	426409	402197	420489	436333	424212	378072	431651	436940
	580	3.44216	286721	9583	11598	18320	34688	8855	27127	92132	51511	45567	15639	50274	5241	5907	6071	11161	10236	8200	10673	8958	401170	40204	656834	409547	37027	65958	110633	259276	954329	387900	353619	400658	437358	421149	405413	426182	433174	427646	378072	431651	436940
	581	3.4481	278892	8940	12206	17228	34422	8207	27351	93954	57089	43578	15302	54258	4511	5218	6328	11667	9635	8018	9864	8065	316430	46267	606224	373849	40078	67375	111606	252207	879100	384688	360630	396284	438185	426736	406591	418582	436657	429941	378072	431651	436940
	582	3.45405	266107	10727	12744	16955	34516	8852	25575	103051	68962	45052	16477	55624	4980	5285	7857	12686	9402	10151	8401	8099	222462	53863	489677	309572	37743	69099	113538	252484	800027	384775	361759	394787	435619	419365	409280	428934	431323	427989	378072	431651	436940
	583	3.45999	267695	9360	13267	18608	27353	8432	26446	109009	80643	44747	14765	55357	4371	4768	6309	12243	10641	8953	7609	8845	143853	67473	371460	224306	37796	65103	115814	253836	697772	378152	358452	408238	437956	422141	415076	433781	438375	425439	378072	431651	436940
	584	3.46594	262152	9928	14044	18506	35283	8228	27711	114248	97245	44221	14664	57993	5828	5342	6303	14494	10921	8902	9855	8540	92861	78304	264687	146438	37446	66605	110582	261987	602400	388042	355131	407879	437756	428014	410173	430194	435062	429677	378072	431651	436940
	585	3.47188	255377	8877	13886	20742	34406	9317	28591	118218	114525	44980	14382	62359	6185	4563	5876	12628	13145	8782	7218	9926	58623	95671	168026	97009	40184	65891	114915	264004	513621	386922	362983	402809	437534	419531	411974	430552	434012	435344	378072	431651	436940
	586	3.47783	248163	9562	14077	18460	35438	10496	30795	121220	134413	44737	15266	64048	4165	6785	5834	13265	16083	8954	8521	8846	41604	119836	106818	75877	41378	65984	112029	259697	452060	376770	355793	407614	430405	431115	414414	421550	432488	437521	378072	431651	436940
	587	3.48377	239977	9081	15729	17515	34633	9385	29967	123118	149347	44569	15340	69234	4738	5608	6340	13384	15747	8796	7529	10022	30847	140366	60568	68108	38487	65147	114676	267464	403959	383571	360078	408145	434249	430098	426805	430825	436224	433201	378072	431651	436940
	588	3.48972	234500	10359	15618	20445	33785	8929	29127	127641	163908	46454	16170	68054	5226	6155	7731	14184	18350	8771	7362	8637	25917	169896	39324	71558	40431	65765	114005	266329	380250	384914	357075	403539	437369	428058	420294	433469	432529	418082	378072	431651	436940
	589	3.49566	227524	8923	15454	21354	26217	9456	29243	130368	167927	45736	14329	72017	5253	7327	6191	14743	19927	8908	7496	8794	25027	198779	27294	74221	36710	66237	116859	263932	381618	383538	351561	405396	440407	424005	430585	425002	426155	430640	378072	431651	436940
	590	3.50161	220951	10447	16272	19677	34993	9241	30083	138762	171615	46303	14706	78075	4984	5981	7877	13015	23419	11101	7878	8382	25023	215322	21426	79616	37449	69265	115913	265170	397055	381456	351182	406821	434132	414115	429242	430687	439169	434781	378072	431651	436940
	591	3.50755	216154	9030	15254	20746	27247	10917	29856	143788	176565	47548	14452	76931	5039	6822	6302	13406	23492	8945	8983	8867	24221	228265	19591	89042	38751	66388	116166	271928	421752	381202	358253	400108	442945	423741	445278	430115	427592	426225	378072	431651	436940
	592	3.5135	210107	8416	15953	21242	32821	10736	31529	145066	179584	45656	15174	80678	5401	7544	5372	13462	26063	8550	8888	8997	22756	226544	18468	97853	39693	67377	114010	262724	484215	377681	359493	395608	445574	423727	447098	428444	432889	423175	378072	431651	436940
	593	3.51944	205697	10303	16178	21293	35398	11060	31142	152230	179635	45176	13713	81857	5845	7282	5998	12288	26988	9092	8563	8838	24283	210964	20045	104373	42919	66562	116050	262594	580048	379797	359873	406427	444601	426341	455135	425267	438670	423423	378072	431651	436940
	594	3.52539	203742	8790	17359	21429	34036	10707	33561	160859	180367	46160	12788	85294	5274	7297	7120	11017	23813	8890	8288	8044	20409	184928	19535	106715	39263	68493	118756	263258	694803	381373	360121	406458	447316	427636	452386	421872	438394	437044	378072	431651	436940
	595	3.53133	187311	9330	17456	21565	34204	10268	33671	167224	180741	44190	12328	88339	7466	7745	4803	10877	25216	9185	9074	8524	19106	148021	17797	105705	39913	67010	116531	267082	844309	383761	354676	404971	440526	417689	446386	432363	431186	431819	378072	431651	436940
	596	3.53728	191811	8844	19158	24201	28825	9985	34415	175385	180965	42883	12728	90837	5598	8888	4519	9873	25728	9531	10754	7988	17842	112694	17539	102150	39557	69288	113802	268359	997261	379613	353070	406716	448179	428158	447036	432266	423738	435029	378072	431651	436940
	597	3.54322	179512	8418	19110	24839	22286	10964	35515	178171	182101	44534	10471	94366	6253	8676	6075	9201	25883	9972	9971	8395	15633	79294	16244	90695	39781	72186	117565	277313	1113565	384825	361417	400329	446644	424508	443806	430439	426878	428445	378072	431651	436940
	598	3.54917	174826	9629	19855	23040	20838	10677	36094	182737	183708	42611	11538	97337	5971	8207	5474	7916	25277	9974	10089	7947	16048	54569	15945	75258	42563	71047	115324	271165	1187445	382429	356478	406030	450061	426278	444925	430252	420980	435165	378072	431651	436940
	599	3.55511	165227	10256	21942	24413	20562	10625	37641	188386	182749	42704	10408	102687	5695	8405	4414	8073	23251	11353	11933	8425	14985	32815	15164	60867	44659	72239	117305	275899	1199673	381822	358120	411895	456393	413890	450455	422100	434711	436749	378072	431651	436940
	600	3.56106	152451	8755	20795	24240	19916	10267	38621	192325	178708	41919	8593	106886	5879	8980	4916	8494	22181	9756	10401	8604	16420	22853	15122	49635	43100	67590	117824	277958	1138846	384185	357557	405298	453837	416175	448905	425701	431172	433012	378072	431651	436940
	601	3.567	137361	8896	21469	25754	22055	12033	39236	198849	180240	44953	8676	110932	6441	8737	3854	5742	19832	9459	13108	8616	14290	15755	15527	40618	43150	68700	119603	271544	1039789	382205	359861	398999	459425	425702	443683	419229	434125	434690	378072	431651	436940
	602	3.57295	121774	8508	21394	27993	19530	10247	40086	200704	176600	42217	8132	110504	8512	8753	3639	6722	18977	9918	12420	9190	11573	13300	15201	33470	43610	69750	123006	278816	906632	381733	352942	395569	448227	417041	443305	418217	435878	436639	378072	431651	436940
	603	3.57889	111236	8170	22203	27097	20565	9795	44153	208994	180300	43296	8889	111836	6305	7741	4147	5194	17590	12276	13037	10892	11918	10979	15600	29206	46712	67950	121659	282249	771978	381868	353510	403341	459160	428016	447951	419602	425431	421770	378072	431651	436940
	604	3.58484	109996	8167	22521	27539	21769	9536	39858	213307	178032	42537	9613	114734	7143	8508	4819	5447	15987	10275	12658	12247	11061	13010	14556	27641	43087	71675	121069	272554	646362	377707	359897	408343	462663	420934	439170	428628	433720	435511	378072	431651	436940
	605	3.59078	104212	8476	22733	30440	19757	10006	36332	211810	177073	43320	8072	117417	7222	8628	3780	6679	16008	11324	13857	10667	9623	11128	16403	26281	46116	68766	122009	283893	551535	396932	351829	404844	464760	427516	457765	426623	434950	437865	378072	431651	436940
	606	3.59673	96535	8211	24915	29885	21045	9468	35198	220204	178837	43087	8101	113217	8990	6589	3612	6530	15083	9957	16499	11734	8740	12097	13894	26178	47495	70200	121644	283205	485725	417448	356319	408703	451093	417275	460555	419579	420204	430596	378072	431651	436940
	607	3.60267	94414	10108	26282	30857	23001	9638	34086	224701	179091	44754	9341	93232	9025	5939	3505	4709	15279	10986	15944	10281	9103	12570	14360	25918	46622	69984	120611	279288	434415	447997	355206	400628	466218	424878	467587	430195	432514	434997	378072	431651	436940
	608	3.60862	97977	8252	26892	30940	21305	9360	36075	227923	180416	41311	8853	55335	8196	7568	3611	4645	15638	9789	15983	10070	8683	13281	15052	30108	42705	70255	120706	281950	414766	465179	358419	405453	465335	419040	476710	433937	434343	431026	378072	431651	436940
	609	3.61456	91503	8300	26348	31319	22944	8858	34934	228093	180442	39065	9157	25295	9703	5961	3525	5975	16178	9743	15858	11425	8409	12730	14539	31339	41586	70517	123014	278664	397838	449765	351158	411257	458893	426852	470826	429489	432197	435752	378072	431651	436940
	610	3.62051	86208	8008	25787	31539	21335	9056	36197	231820	188464	37219	10438	19761	8925	5475	3310	4747	16283	8992	15884	8864	8963	14663	16749	31077	42978	73809	126091	292557	379778	432390	359671	410067	468025	428674	474814	430661	431543	425013	378072	431651	436940
	611	3.62645	86778	9751	25280	33271	21808	8361	35437	232887	186442	35480	8901	17721	10655	5386	3491	4445	16763	8796	16820	9063	9206	14659	16449	35272	44580	74454	128155	289804	374876	418492	355201	410388	471552	425452	474734	426696	431434	433761	378072	431651	436940
	612	3.6324	80111	7992	26441	34738	21365	8655	36138	224507	185893	36533	10132	16035	9624	5459	3729	3999	18152	10618	15316	8411	9279	15584	15118	37511	45838	74777	125861	286550	375592	410705	361163	405820	458561	430587	462535	419775	436779	432495	378072	431651	436940
	613	3.63834	80597	8584	28618	32521	24404	7643	41583	224236	184246	36006	10839	16127	11401	5344	3573	5427	17005	8556	16585	9509	8853	16310	15845	42659	44496	73094	126674	286801	368287	405423	356352	396891	461000	426412	459273	427329	436642	431686	378072	431651	436940
	614	3.64429	78604	9647	27128	33742	23352	8225	36741	216819	182800	35136	9399	15284	10149	5257	4137	5642	16632	8742	14143	8094	9083	17718	15018	48140	42493	72402	130734	287851	366197	396834	361433	412473	466266	427121	456158	425127	433308	433088	378072	431651	436940
	615	3.65023	74592	8599	29659	37365	24219	8472	41486	210749	173391	34408	9671	16849	11202	5368	3566	3870	16165	8983	14964	8254	10063	18431	15925	54695	44481	77166	130485	288365	370054	388778	363834	408798	473472	431250	449473	426492	426450	433651	378072	431651	436940
	616	3.65618	76446	8128	30418	37017	25096	8031	43146	199868	166964	34682	8973	14229	11692	5570	4033	3834	12850	8732	13982	8584	9120	20706	17986	64116	40589	77451	128917	284610	369127	385900	347725	406326	473024	424538	452317	426485	433831	436997	378072	431651	436940
	617	3.66212	92105	8363	31861	39925	22332	8033	43945	182860	151231	36551	8656	12905	10239	5211	5035	5521	9907	9330	16484	10126	8726	22610	18063	70842	42285	74585	128672	286843	372892	378141	356052	409668	474713	428088	455193	428871	426454	435489	378072	431651	436940
	618	3.66807	169141	9268	33175	39170	24073	8560	43212	166096	144150	35729	8582	12064	9835	5015	5380	3349	9437	9096	14941	8893	9027	25117	21016	80066	43349	73957	129940	275594	374417	392764	357262	409284	464887	429954	456886	419491	424019	439874	378072	431651	436940
	619	3.67401	343455	8111	33023	41126	26386	7648	47038	147202	133992	34947	8438	13153	7526	6865	4199	3413	7045	9029	16585	10900	9957	24396	21278	82772	45208	80452	126896	289012	369767	396026	349923	406958	474904	425371	461166	425253	431336	434387	378072	431651	436940
	620	3.67996	636023	9463	32933	40315	24121	7243	48847	123429	118682	34854	8429	11304	5185	6821	5250	3809	6038	9432	17507	8802	9867	21957	23043	87145	43534	76198	129806	280811	370948	394007	351763	397952	473020	427404	472519	422836	437411	425327	378072	431651	436940
	621	3.6859	1016308	10329	35107	43669	25459	6658	51670	106707	107857	32969	7945	12452	5252	6026	4337	3346	4783	10818	19196	10175	9777	21728	21996	85346	43284	77553	127272	290412	371670	383569	353057	409737	473622	427868	484793	427980	433815	433354	378072	431651	436940
	622	3.69185	1433403	9546	38467	42377	25190	8048	53974	90869	102047	32398	8216	11336	6600	5347	3917	5092	4671	9165	20340	11420	9052	20020	23090	83325	44013	78341	129913	286068	367101	391392	358026	410395	474240	425596	481010	429392	434275	430246	378072	431651	436940
	623	3.69779	1863449	7853	38098	44198	24745	5917	54313	75626	91920	32016	7466	11333	5075	5123	3449	3262	4598	10360	20870	10043	8760	19327	24291	74195	47017	79195	130879	292977	363647	390092	354434	399695	477280	428861	500490	431549	428768	432666	378072	431651	436940
	624	3.70374	2227442	8778	39550	45886	28057	6064	54996	61782	83990	32905	8213	10260	5334	5073	5363	3108	4079	9018	22565	12231	10362	17622	27212	67095	45118	80255	132320	288173	370124	388800	358398	406597	471601	428328	500675	422075	429756	425814	378072	431651	436940
	625	3.70968	2434849	9575	42313	49863	25165	5893	55994	50484	78803	33034	7219	9554	5031	4911	3749	3207	4822	9458	22559	9712	9153	14878	27368	56043	45315	82068	136069	296336	374827	392592	359050	405958	468476	431274	498753	429870	431419	432969	378072	431651	436940
	626	3.71563	2264610	9142	43773	48891	25898	5888	59486	44206	71016	32074	7577	10768	5018	4728	4245	4787	4736	9399	22391	10006	11407	12605	29503	46357	44138	77343	131972	296543	376316	390951	360186	409027	471083	432553	498365	427091	428704	433340	378072	431651	436940
	627	3.72157	1757092	7791	47117	53184	25869	5514	59342	37005	67331	33474	6640	10108	5586	5742	4383	4466	3998	8892	24496	10639	9866	14261	30027	40434	41959	79068	132202	292049	393833	391542	354163	408902	476146	425271	492395	429733	431440	439098	378072	431651	436940
	628	3.72752	1301837	9479	47355	54181	29289	7363	61676	30366	61643	32527	6578	9749	5466	5369	4053	3265	4213	9700	22789	9778	11507	12724	32061	33744	44324	82479	136285	295103	424393	391912	361035	398257	468439	421678	483128	426887	432311	428477	378072	431651	436940
	629	3.73346	1061046	9441	50389	51232	28896	7588	64057	26166	60349	33335	6240	9241	5480	4717	5975	3695	5999	10596	23077	11189	10316	11598	34387	29392	41283	87462	135792	295654	454536	390333	356874	408511	465383	431191	483388	429388	435889	436859	378072	431651	436940
	630	3.73941	903865	8962	51118	50259	27946	16466	64027	23311	59151	35405	6014	9388	5898	4924	4699	3270	4579	12282	21116	10720	10038	11295	33640	26428	41477	91664	132699	297895	510535	392834	358578	406981	467048	426490	492892	428039	437728	433757	378072	431651	436940
	631	3.74535	791246	8374	54918	42261	27072	43672	65402	21252	56137	35764	6640	9854	5786	5214	4502	3489	4510	11292	21640	10343	9673	11460	34239	24329	45473	97972	133943	289155	558950	383834	363627	407353	464304	419589	509770	433901	431289	432571	378072	431651	436940
	632	3.7513	713711	8440	53704	24185	25150	106588	65649	20491	54915	37151	5437	9188	5313	5377	4870	3748	4428	13775	19679	11810	11000	11672	33943	24356	44378	107426	137610	296429	580934	392662	356325	408029	462453	427608	506243	431673	431251	427165	378072	431651	436940
	633	3.75724	634564	8275	57909	12797	25979	195357	66100	18679	51258	38351	5161	9116	5833	4929	8548	4771	4160	13280	19710	10718	11644	11969	32555	23110	41885	105105	133467	298408	605335	393066	363389	403197	464485	430257	527645	424622	432795	430889	378072	431651	436940
	634	3.76319	574000	8748	58313	7492	30578	287105	68779	17279	50737	37034	4696	6876	5592	4974	18625	3301	4193	13215	19304	10619	11687	12449	28894	23616	41339	101208	133658	294738	605750	385989	363905	411099	457757	425107	533971	432025	433301	423303	378072	431651	436940
	635	3.76913	515558	9447	61107	5817	27364	357602	69296	15072	49660	38563	4260	5691	5273	5810	24560	3402	5591	14134	19726	9573	12513	12571	27257	23733	42419	94320	134597	298412	571443	395474	358501	404893	456995	426049	540620	427141	433437	433442	378072	431651	436940
	636	3.77508	461612	8048	63461	6030	29234	395807	68041	13973	45351	38424	5641	7021	5908	5292	25747	3681	4255	14597	16697	11696	12782	13427	25383	23841	42234	89545	138669	304761	540595	388412	361095	409391	460564	429520	539871	430211	426650	438960	378072	431651	436940
	637	3.78102	417287	8264	68881	6518	28505	420764	72330	15596	45360	39000	4472	5280	6180	6792	27568	3690	4301	14549	18604	10538	14402	13315	21361	23688	43297	85501	137676	302207	497217	396089	359980	406160	454696	426636	535595	430300	420130	428502	378072	431651	436940
	638	3.78697	372859	8264	70461	6065	27685	447914	71931	13612	42219	38727	3735	5042	7467	5252	27462	3463	4139	14742	17725	9635	13701	13613	19668	24312	45205	80384	131583	313173	447513	387737	359281	406157	457200	418562	516764	429311	433010	435002	378072	431651	436940
	639	3.79291	338860	8438	72382	6323	26318	476474	73968	15086	40906	40537	3583	5629	6503	5612	28808	3667	4412	15672	16797	10286	13366	14402	18158	23637	42203	78843	137507	326605	416417	401556	360688	412930	455354	422601	496510	427122	434674	431109	378072	431651	436940
	640	3.79886	306318	9219	77198	5985	28718	499836	75800	15480	43475	42788	3522	4941	6401	5329	27720	3335	4005	15382	16866	10300	14636	12599	19938	25379	42687	81171	134928	343899	397567	405230	360532	407926	456651	427197	491129	416331	433895	436353	378072	431651	436940
	641	3.8048	285547	8155	83361	6084	27244	530592	74374	13488	38531	42881	3414	6958	6242	5465	27941	3669	4636	13299	17178	9993	13700	12871	20738	23929	43290	78620	135192	348914	380726	408576	357902	415497	451573	428208	455689	425564	435147	421938	378072	431651	436940
	642	3.81075	258813	7691	80574	6234	26282	541052	77735	14001	36817	42270	3678	7211	5875	5438	26237	3699	4138	12313	17287	10021	12752	12129	17371	24037	44447	78973	142029	354388	378477	408251	349935	411640	441423	429931	444820	429081	434823	436877	378072	431651	436940
	643	3.81669	238246	8882	86925	5952	25707	555114	76000	14377	38356	42732	4778	5899	5992	5562	27357	3536	4281	11093	15586	10129	10145	11923	17016	24685	44061	82959	137768	349584	374885	407625	355340	411927	450481	427636	437611	415396	434788	435798	378072	431651	436940
	644	3.82264	222929	8511	86494	6140	27100	564151	76843	16307	36055	42554	3183	5326	6031	5957	25952	3579	3920	11001	17765	9452	8462	12840	16681	24232	47404	81986	136000	347613	371796	413656	350281	406293	445091	424863	419136	430610	432411	434539	378072	431651	436940
	645	3.82858	207912	7808	86522	6374	28387	573030	78649	14951	39214	45359	3809	5778	6076	5386	25789	5526	4071	9124	14791	9288	8470	12644	16114	25016	47339	80000	139127	353883	371215	412037	357431	415228	446049	433809	422039	430271	434400	426455	378072	431651	436940
	646	3.83453	195027	7967	89308	7539	26402	576599	80132	15449	42030	45991	3577	5402	6554	5722	24756	3624	5549	9721	13959	9746	9166	12561	14995	25238	49386	85489	140646	350147	362336	404208	353653	404209	440299	422610	418039	425460	425136	433440	378072	431651	436940
	647	3.84047	177321	8035	92578	7074	27921	589855	81915	15329	55226	47819	2878	6120	6390	6316	24781	3427	3879	9809	13115	9301	8593	13429	16843	25235	46939	80676	136908	350369	368683	403762	361440	412518	437861	429438	403849	429371	424897	434377	378072	431651	436940
	648	3.84642	165727	8946	89662	5769	28576	604269	84036	17122	80659	47890	3691	6185	8548	7123	22933	3729	5671	11514	12628	9983	8078	13661	15019	25082	47704	81614	140362	348984	369734	412144	357506	410464	440783	436951	414908	430965	433293	433161	378072	431651	436940
	649	3.85236	152380	7021	94539	6516	25761	616108	87746	15655	127263	48552	3721	6058	6942	6521	21131	3713	4184	9447	11240	10238	7905	14286	15034	24902	46771	84136	138767	347558	371132	403958	356966	406171	432255	428351	409567	430733	433727	434014	378072	431651	436940
	650	3.85831	145308	8607	93305	6675	25886	627806	93610	14730	201043	46960	3390	5482	6305	6812	19934	3860	3982	8813	10580	10316	8939	15296	15771	27781	45358	84642	143385	333948	376966	400810	359344	413295	436904	429365	410103	424355	434838	435749	378072	431651	436940
	651	3.86425	131727	8532	93676	6405	27995	650207	95447	16224	300201	49971	3865	5831	8726	6452	19270	3627	3893	10402	12206	12032	9140	15858	15373	24557	45175	84677	140624	330832	385117	405326	358521	411147	435877	428871	394683	419253	429694	425502	378072	431651	436940
	652	3.8702	123888	7335	95214	6303	27510	663329	96775	15093	414855	50045	3426	5735	7923	7077	17834	3710	3655	10206	11365	10868	9300	20059	14987	24723	46526	85423	138654	322501	408747	394860	356136	410989	435714	432154	402696	425315	428566	434075	378072	431651	436940
	653	3.87614	117447	7519	94037	7729	27849	675847	97047	15239	542354	50308	3221	7229	8219	7076	19154	3710	4426	9344	9674	10210	9447	21212	14416	25673	49623	84110	144289	324882	449301	401995	356315	412287	434258	419293	396976	423779	436261	435119	378072	431651	436940
	654	3.88209	104394	7582	97419	6191	27509	684835	101089	15031	663368	51067	4635	5519	9453	7464	16027	4016	3934	8868	10912	9953	9774	21895	14755	24048	45354	87766	142450	311280	495050	396063	352754	401249	434490	426422	399071	428899	424565	429580	378072	431651	436940
	655	3.88803	99191	7187	98875	7569	25136	697521	100470	15281	772369	54114	4463	5496	8607	7693	17830	3648	4592	9499	11644	9915	10429	24558	16576	24184	49027	83668	148848	313877	545988	395967	354196	401947	428959	419984	395335	427120	432250	436495	378072	431651	436940
	656	3.89398	91597	7191	98511	7062	27674	704174	96604	15357	840448	55247	3710	5172	9955	9912	15673	4627	5038	9671	11176	10451	10461	27093	15170	27532	50660	83396	148960	311365	615721	387412	352850	412105	425774	424085	389867	424536	427254	428404	378072	431651	436940
	657	3.89992	93055	7062	101214	9000	25505	713647	95670	12840	839694	55007	3607	4631	9194	8927	15171	3717	4452	8505	9160	9469	9879	30948	15496	24427	51213	81530	149578	307144	681596	389776	350620	413729	433007	419591	395192	421044	435933	422800	378072	431651	436940
	658	3.90587	87170	7490	100110	8167	26702	720235	95711	11002	759092	55143	3827	4446	9147	9070	14905	5093	4202	8608	9108	10274	10451	35654	15895	27027	50671	84315	144332	300126	733818	393341	358646	412921	428743	419978	394501	419090	434088	433271	378072	431651	436940
	659	3.91181	83978	7305	96687	9340	25932	745407	88189	11635	606216	56754	3850	4206	11532	9930	14702	4851	4161	7846	9122	10196	9559	40522	15550	25194	56683	86287	145593	304568	755800	393501	360207	411755	429568	430296	392260	429040	427272	424875	378072	431651	436940
	660	3.91776	78502	7437	93443	10846	26523	768316	86400	10580	418467	59382	3841	5705	10633	9635	16023	5088	4315	7427	9324	10932	9673	42776	15475	26999	59749	88565	146891	304437	748410	382643	354069	403288	427487	427630	398025	429574	434536	436525	378072	431651	436940
	661	3.9237	75671	9123	87012	11483	27827	785323	79396	9529	253808	61597	3865	3915	11340	9522	14510	3582	4164	6832	8843	10450	9516	44793	17484	24793	63662	86716	152388	306908	708818	393730	360662	406476	429653	427774	405844	424678	441029	434329	378072	431651	436940
	662	3.92965	68776	7607	84321	14336	27959	806034	74061	9594	134114	61257	4066	4127	11438	9827	12060	3688	5553	9212	9283	10002	9321	44825	17577	25396	62234	83919	147218	305549	671195	380896	345793	405867	419535	423968	403756	427227	437347	426695	378072	431651	436940
	663	3.93559	62235	7817	76786	14917	24915	827931	66197	9775	69436	63087	4513	5516	13592	9884	13742	4943	4840	8979	9962	10258	8428	43651	15267	25726	58814	83117	148379	308805	606807	387914	360275	410984	429759	432739	411147	427368	438383	440033	378072	431651	436940
	664	3.94154	61177	7731	68847	14006	23499	828751	60476	10658	39970	64843	4331	3988	14123	11983	11155	3682	4785	7025	10939	10499	9847	35003	15295	24845	57842	83703	147914	309420	539374	376904	361223	413420	432868	426929	415283	428336	429074	432284	378072	431651	436940
	665	3.94748	56964	7007	66119	14554	21608	859598	56784	10290	27688	71277	3939	4372	13401	10964	12978	4092	4136	7510	9626	9796	8058	24007	14838	26473	55525	83382	152320	309348	497197	388703	356423	400018	426347	417580	413142	428825	437201	426700	378072	431651	436940
	666	3.95343	57677	6998	60458	14987	22627	874695	48320	12234	23054	71848	4166	4490	13770	12652	13170	3590	5984	8364	12039	9600	9454	15465	15832	26009	53153	84706	151622	307290	461701	385578	357981	412069	415155	433292	420146	424383	423551	432066	378072	431651	436940
	667	3.95937	52213	6971	54463	13818	22476	877298	44631	12422	22510	75943	5598	4711	15217	13737	11009	4351	4650	6784	9472	9061	8212	14107	16161	29027	53593	86315	153149	308988	450137	384173	356280	412687	429449	432253	414227	427390	431110	430604	378072	431651	436940
	668	3.96532	51069	7450	49382	16770	21914	883050	41635	12053	21897	76857	4295	3983	15336	11333	11961	3875	4636	7008	9530	9287	8379	13307	15885	28073	52480	86445	152537	304817	450328	387882	357362	400921	418270	432628	411840	418543	436693	436205	378072	431651	436940
	669	3.97126	48121	7110	46688	16784	18548	894766	37633	12756	23086	80745	4045	4893	14587	12372	10561	3357	4423	6790	9749	9317	8620	13358	16361	26326	51768	89356	149885	300841	488818	389676	356302	405110	420959	428845	409499	423285	424911	433586	378072	431651	436940
	670	3.97721	48127	7295	42269	17772	19683	907733	36947	11897	23525	84227	4368	4638	15311	13782	11490	3776	4136	6850	10064	9872	8021	13580	15788	26457	58992	84356	148257	311192	529180	390153	358057	404271	427350	432598	400325	426446	436602	429898	378072	431651	436940
	671	3.98315	44714	7760	40120	18342	17656	916419	35370	11281	23083	84965	3817	4085	15115	13449	9581	3987	4390	8550	10009	9892	10205	16162	15608	27777	64183	84436	150738	309063	582904	388057	359679	411540	425029	442739	405428	427977	435090	435059	378072	431651	436940
	672	3.9891	39444	7603	36876	15941	16251	920527	35381	13709	21861	87945	4097	4948	16037	12638	9668	3472	4661	6752	9770	9497	8229	13920	16515	26389	83727	84311	152563	308087	617919	392765	353229	409429	426797	450362	402643	431387	437072	434892	378072	431651	436940
	673	3.99504	38525	8736	37589	16196	15282	929050	33000	13072	22020	88512	4227	4305	11511	12166	9201	3325	4595	6650	10137	11186	9993	14287	16233	27203	120225	89920	151499	308229	651068	388553	351770	407007	423592	453629	402308	429660	436397	438418	378072	431651	436940
	674	4.00099	38271	7706	33782	18047	13843	933014	33150	13196	22050	90593	4231	4645	7952	13558	8856	3422	4452	6517	9983	10969	7700	15752	18244	28814	159226	86710	150322	308938	641082	381137	356754	400001	423998	448620	407619	429325	436521	433753	378072	431651	436940
	675	4.00693	37273	7558	33278	18380	12643	959063	35248	13642	21629	89814	4019	4258	4782	14422	9783	4410	5951	6121	10158	10352	8358	13494	19405	27552	199178	83929	152163	308496	632483	391484	360489	412689	424986	457513	402091	426305	427551	440320	378072	431651	436940
	676	4.01288	34246	7264	33385	18810	10852	996162	35911	13622	24671	90778	4526	4076	3967	12935	9272	3883	4974	7289	11552	11550	10635	14195	20153	27865	212545	86927	149879	300492	598651	392725	358528	411691	412124	460760	419483	425810	428445	432244	378072	431651	436940
	677	4.01882	31798	7617	33408	17611	10173	1024409	32802	14108	22967	92390	4651	5135	3562	15227	8554	3616	4540	8115	11760	11165	7962	15355	19951	27125	202205	89776	153353	307366	572471	389024	357969	413646	420216	457214	428311	433061	430620	432667	378072	431651	436940
	678	4.02477	31374	7194	32254	17533	7728	1056546	33592	14810	22973	91874	5517	5651	3524	13902	9345	5262	5885	7029	10105	12380	10454	14644	21769	26879	176918	88860	148943	302722	540253	392059	361887	406381	413388	447827	429038	427038	434776	431952	378072	431651	436940
	679	4.03071	32582	7466	33297	20120	6984	1116741	34608	14692	25717	93326	4551	4620	3273	15328	9624	3385	4827	7347	9477	13015	8625	15067	22260	25843	131563	87607	157641	308219	508204	384976	350863	402448	425582	446562	434320	433394	436234	431745	378072	431651	436940
	680	4.03666	30849	7670	32039	18101	7832	1151900	34051	15569	23737	94464	4754	5021	4609	13901	7196	3595	6207	8281	10436	14507	9736	17423	21966	26920	99518	88286	156047	308254	489385	394900	360986	402598	423250	439006	440214	419986	424890	424614	378072	431651	436940
	681	4.0426	29941	7514	32805	19005	8699	1191867	35128	14755	24478	95460	5773	3513	3531	14251	7715	3350	4737	7995	11419	17198	9810	16289	21631	26682	79091	87514	152300	308998	470060	394949	360484	406494	422618	444777	429955	428019	434648	429986	378072	431651	436940
	682	4.04855	28608	8476	32963	21518	8841	1231882	34582	15382	23929	98666	4580	3578	3282	14115	9430	3781	4780	10428	10388	19806	9321	19033	21773	27974	72388	88286	159172	313603	447403	395457	360000	407008	412895	438352	427819	429998	428756	431913	378072	431651	436940
	683	4.05449	29550	8363	30834	20040	7694	1251811	35462	14815	25122	99863	5114	3237	3649	11651	7197	4232	4953	11373	10632	22326	10234	16164	20350	27001	63846	91638	161788	309577	429373	396528	354466	404645	413895	440645	435188	431838	436949	433020	378072	431651	436940
	684	4.06044	28954	8338	32907	21779	8711	1242454	36038	15183	23605	99142	4670	3402	4966	10715	7848	4953	5147	14395	9959	23359	9896	16921	19431	28973	62026	90549	160093	309905	413307	398840	359029	402306	412558	434648	421478	431760	435047	429202	378072	431651	436940
	685	4.06638	27504	8330	35259	21804	7139	1214298	33971	17428	25449	104166	5222	3657	3513	6595	6365	3907	6492	16055	9492	25993	9717	17178	18641	26823	59244	88258	165932	304905	393282	404932	358962	409748	413510	433554	405963	419035	434836	436005	378072	431651	436940
	686	4.07233	25333	8974	34592	22856	7072	1170641	34036	15828	25127	106992	5326	3395	4241	4630	8538	5008	5284	16829	10025	24368	10832	16872	18088	28394	58571	87536	164399	304491	389160	404294	361960	405920	416230	424426	409873	428139	422463	431480	378072	431651	436940
	687	4.07827	24089	7472	36120	22519	7484	1112700	32533	16041	25823	116925	4963	3247	3364	3878	6620	5030	4539	19248	10681	23125	11224	17881	17216	26544	60427	89572	162149	300541	384971	415507	360624	408132	421487	434793	397202	426900	425887	433312	378072	431651	436940
	688	4.08422	23639	8340	33949	21409	8806	1045487	32102	17151	24611	120405	5421	3287	3413	5157	7240	3980	4453	17322	10065	22378	12105	18013	17600	27854	56777	88646	162133	304278	379348	415564	358702	409829	416705	433750	395702	424551	438915	436223	378072	431651	436940
	689	4.09016	25341	8816	34966	23369	7061	963016	28127	16147	23448	125430	5405	3278	3419	3640	8956	3568	4742	15295	10131	19663	12511	16115	17969	27644	55060	91811	160041	313383	381606	428193	359974	409037	421112	427164	398711	423039	433803	431865	378072	431651	436940
	690	4.09611	25081	9033	33110	21721	7362	872384	27577	15364	24096	132877	5069	3523	4833	3630	13398	3922	4665	13514	10653	16563	14519	15514	18362	27382	52620	95100	159837	316195	383559	429264	360335	410404	410738	436006	395286	418412	430945	426218	378072	431651	436940
	691	4.10205	25439	7261	31192	23143	8410	779790	23378	15997	24165	145165	4992	3169	3370	3692	19960	3430	4509	13050	9707	15917	13430	15049	15635	28144	55825	90444	163091	313483	385674	427285	354217	408539	418024	437812	409311	422118	436589	430125	378072	431651	436940
	692	4.108	22206	7816	30206	23005	9214	695830	23255	15236	22774	150638	5578	3152	3211	5011	26836	3830	5121	11006	11203	11489	14646	15249	18498	27782	53786	89488	158693	325230	397181	429127	359999	410110	422527	438565	414442	422080	427182	431650	378072	431651	436940
	693	4.11394	21573	8553	25354	22620	10090	597318	19906	16878	23264	162039	5298	4207	3347	3762	30571	3645	4651	10245	10266	9803	14275	14821	18967	27298	55773	90416	156247	320292	407949	425356	361968	403306	422017	433638	419455	425008	433560	422837	378072	431651	436940
	694	4.11989	22257	7790	22479	24324	12426	510897	18575	13981	19568	166147	5690	3431	3425	5110	30602	3360	5725	9504	11350	9695	14141	15640	16830	30009	54662	90791	162810	330267	432876	424505	360868	403352	427724	449379	421679	432894	431682	433172	378072	431651	436940
	695	4.12583	21198	7498	23060	23295	14620	432294	16485	14033	20938	167549	5447	5220	3224	3978	28736	3912	6286	9349	10683	8072	13933	15621	18415	26656	52469	90313	157507	338648	455261	422924	362105	403958	422697	435389	427865	427336	436864	432277	378072	431651	436940
	696	4.13178	21264	8187	20837	24194	13855	368163	14216	13493	19547	160020	6251	3188	3614	5030	27238	3397	6421	8444	11141	6823	12932	16786	17099	29863	52419	91527	162107	328242	492057	412461	361520	411863	412998	446208	430930	431645	427104	431355	378072	431651	436940
	697	4.13772	20486	8243	18620	26036	13260	315190	13866	13376	19400	145877	5542	3118	3288	3979	23287	3438	4663	8249	9855	6798	12873	16237	17473	27679	56581	93624	162545	337050	516955	414516	359011	419404	410255	443365	432369	428716	431865	435603	378072	431651	436940
	698	4.14367	20180	7791	20004	23963	14089	272750	13030	13122	19872	128475	8329	2920	3427	5259	20348	4055	4996	7399	11605	7040	12758	16678	18291	27117	51857	93847	164288	334061	540628	404975	358911	403632	421254	443093	431850	430014	433757	428939	378072	431651	436940
	699	4.14961	20320	9758	19507	25780	16094	245592	13027	10488	21750	109151	6222	3307	2690	3481	18764	3772	5090	8104	11455	6164	11075	15863	16482	26541	50865	97726	162791	329147	543597	411324	363838	412745	419868	441457	421700	432816	437872	428164	378072	431651	436940
	700	4.15556	22330	8108	19588	25198	14760	219419	11413	10888	20233	88827	6804	3050	3635	3400	14730	3604	4648	8322	11513	6298	10321	16460	17674	29584	54160	96579	165118	328836	537754	409860	362440	410350	421703	439264	425022	427279	423317	432883	378072	431651	436940
	701	4.1615	20602	8563	19760	25582	14060	195797	11428	9294	22130	71487	6563	3165	3243	3472	14719	3201	4632	8082	10261	6593	9885	16743	17277	26655	53198	97069	168430	329469	514784	405016	362448	412341	420795	440487	420294	429969	436527	425348	378072	431651	436940
	702	4.16745	20059	8662	20017	28603	17040	169198	11065	9427	20887	56459	7224	3138	3165	3646	12452	3306	5035	8580	10847	5980	10158	17758	17994	26942	51161	94690	166816	325946	483499	402181	362018	403635	423044	437734	415490	430622	429670	433703	378072	431651	436940
	703	4.17339	21543	8753	19848	28776	16484	139307	11179	7868	21213	46688	7541	4417	3376	5114	11710	3257	6387	10464	12574	6633	11607	19404	17348	26217	52358	93823	167727	319728	455963	400265	353407	412224	418231	426976	417737	420047	432568	424486	378072	431651	436940
	704	4.17934	22401	9841	21420	29263	15417	110518	11940	6846	22178	37713	6760	3233	3420	3991	12134	3107	4465	9154	11207	6228	8798	18709	19629	28869	52416	96136	166210	316373	445699	397488	360741	410030	419919	441441	414092	428056	433122	424536	378072	431651	436940
	705	4.18528	21150	10198	22085	27210	16029	82676	10631	8007	21452	31949	7063	2862	4860	4027	10858	3482	4191	8918	10854	6413	8796	20052	18054	27510	53455	94185	168349	328412	437856	400015	359530	408644	415353	427318	422702	427740	428386	430247	378072	431651	436940
	706	4.19123	20379	9119	22032	29769	15647	58637	10802	7871	21255	29834	6843	3364	3151	4956	9529	4342	4845	8680	11011	6579	10209	18496	18729	25959	54088	94248	171432	328707	432100	394792	358552	410734	419035	433551	428397	428124	434622	431823	378072	431651	436940
	707	4.19717	20130	9192	21482	29169	16104	40858	11018	6061	22812	27817	7054	3660	4656	3610	9955	4687	4635	9408	10286	6326	11964	22390	17892	27679	53006	94769	175272	330863	440767	395277	362509	400480	413701	442010	437537	427452	431427	425377	378072	431651	436940
	708	4.20312	18588	8493	22723	31522	16670	30639	12074	6220	25272	27954	6676	5015	3323	3160	9280	5284	4395	9515	10897	5926	9198	22189	19345	29430	54261	96053	170429	337447	442225	392705	358470	400059	409379	448412	441848	428480	432351	426199	378072	431651	436940
	709	4.20906	20484	8638	22776	29358	16606	22786	10716	5916	25369	29337	7099	3264	3627	3416	8914	5764	4473	10580	11428	6711	9956	21842	17202	27125	55939	98047	168932	338508	454182	389188	357922	411803	419353	456272	449419	430593	431908	423057	378072	431651	436940
	710	4.21501	18741	9061	24546	29297	18394	19094	9584	6548	26701	28080	8184	4740	3589	3838	9389	5896	4944	11769	11852	5810	8937	21307	18886	29704	53768	98669	171206	340040	458452	391536	358374	402880	424030	455379	447081	427074	431109	427097	378072	431651	436940
	711	4.22095	18761	9187	24971	30636	15901	19106	11019	6082	24539	28761	8868	3420	4879	3950	9183	5890	5250	11336	12043	7796	9809	24381	16586	27725	54243	99883	170026	334745	463434	395254	359095	404587	424214	461157	444036	420475	425386	433996	378072	431651	436940
	712	4.2269	19917	10806	24847	31742	19049	16267	11591	6261	25927	28606	9273	3149	2931	4001	8790	5620	7228	12503	12426	6237	10676	21518	16833	28399	53261	100711	172093	322621	447839	391324	366037	405290	420112	471068	444056	428474	435950	432203	378072	431651	436940
	713	4.23284	17812	9471	24320	31170	18539	14967	10716	5783	27191	30261	7608	3671	3150	3982	8643	5266	7104	13029	12554	6184	10195	21642	16380	27877	53966	103518	172317	328919	440181	381587	360605	407530	413636	472079	454490	428047	424840	435737	378072	431651	436940
	714	4.23879	18190	9317	25136	32589	20274	13507	12152	5683	28855	30142	7369	3737	3276	3622	9026	5359	7436	14602	12371	8315	10959	21946	16607	28457	53116	102523	174925	318279	429691	394799	365395	410891	418414	476415	444937	417191	432676	428884	378072	431651	436940
	715	4.24473	19594	9143	23920	32029	20366	13425	10279	5435	27457	30217	6851	4627	3356	3428	8533	6802	8831	15776	13288	6008	11540	22624	17926	28905	58716	99773	180195	319513	426365	389901	362556	412609	422914	478136	451726	424316	433582	435280	378072	431651	436940
	716	4.25068	19307	9885	23390	32972	20124	12288	10798	4612	29068	28738	6247	2970	2845	3419	8382	4909	10022	16587	13635	6394	12337	22481	15957	28871	54035	102804	175028	326753	421028	390628	363807	408704	413996	476439	438887	426410	436772	434618	378072	431651	436940
	717	4.25662	18866	10609	24112	33667	18059	13148	11452	4935	29850	29432	6694	3276	3605	3850	9359	5359	12444	17948	12117	6934	13586	22269	15319	29314	55914	104430	180722	321954	424523	394860	357379	403697	421372	475019	442817	432109	433903	428371	378072	431651	436940
	718	4.26257	19555	9505	24078	34131	19418	13601	11511	3884	28919	29858	7490	3067	3415	3435	8509	4636	12679	18524	12893	6246	11502	22748	15787	29259	54466	104868	182832	325912	445039	393073	361789	402033	419854	474251	440325	429671	433542	439295	378072	431651	436940
	719	4.26851	18245	9554	24323	32346	19830	11922	11110	4281	30828	31602	6251	3721	3187	3610	8300	5136	11525	23298	13082	6195	12049	23286	18202	29826	54536	103515	179791	324348	450092	394422	362188	408857	424681	463844	430639	430356	430696	434322	378072	431651	436940
	720	4.27446	18852	11594	23485	33322	20009	12064	11568	4323	30175	29762	7275	3167	3610	3687	8716	4869	11438	20705	13485	6360	10867	22421	15879	29874	54307	104387	183441	327829	450206	386198	365418	410342	417273	459536	437234	427195	434912	434731	378072	431651	436940
	721	4.2804	19182	10122	23230	34928	20647	11564	11288	4038	32211	30115	5633	3098	3410	3488	8032	4859	9950	20811	14316	6317	11128	23837	16261	28239	55640	105868	180774	327897	452205	391876	363488	406106	421568	446437	433563	431049	425788	437096	378072	431651	436940
	722	4.28635	17403	10662	23416	33424	20848	10726	9985	4047	31755	32348	5286	3204	5048	3824	8161	5105	8357	20124	13712	5888	10205	22523	15336	29921	56089	105043	179475	322720	447470	399703	361601	411800	414991	447827	426039	428517	434940	430283	378072	431651	436940
	723	4.29229	20645	12434	24378	34724	20882	11513	10895	3902	32065	31493	4810	3269	3557	3713	9363	6425	8154	15851	16418	6530	10331	21674	15920	30612	53350	105500	184020	322547	421578	391479	354106	411007	426210	447492	422483	436545	436276	431887	378072	431651	436940
	724	4.29824	22117	10058	24780	34220	20864	12538	8949	4010	31124	30470	4421	3267	3234	3835	7978	4746	7384	12125	16424	5907	9731	20468	16195	30928	53708	102022	178482	329122	415849	385607	362109	409137	420348	441214	411019	426154	434390	431340	378072	431651	436940
	725	4.30418	22967	10759	26925	36973	21127	13115	9004	4105	32233	30163	4571	3169	3728	4891	8407	4658	7322	9203	18922	6579	9622	20484	17127	29740	57821	101240	179827	325709	407587	389854	352427	398894	418889	441033	403691	429466	432882	428552	378072	431651	436940
	726	4.31013	24693	11344	26515	36815	23135	11616	10325	5172	31720	33048	5450	3366	3418	3952	8172	6030	5335	8177	17424	6684	10523	19427	16818	29446	54137	104408	181335	320111	389350	399114	352852	402037	422253	429675	408572	421361	435490	426907	378072	431651	436940
	727	4.31607	26390	11257	29385	35044	24887	11110	9163	7399	32336	32359	4749	3617	3143	3742	9870	6218	4970	8050	19755	6584	9601	19452	18892	30595	53382	103188	184782	331533	391451	398428	358994	408372	422186	430909	401867	431874	422042	432292	378072	431651	436940
	728	4.32202	25099	11099	28924	35529	24564	10791	9389	12640	32902	33999	4353	3401	3401	4833	7940	5238	4990	8609	22875	8386	10094	17178	16317	29990	54046	103478	178574	329549	390897	395952	360896	409529	424441	433290	393784	432929	423939	425030	378072	431651	436940
	729	4.32796	22464	10375	28467	37598	26901	11550	9940	19625	33132	34770	5324	3356	3486	3309	7575	5267	5082	8645	25461	6435	10545	16842	17716	31389	55648	102170	178027	322972	389412	386798	362985	410118	421837	436093	396361	432721	431568	434253	378072	431651	436940
	730	4.33391	20635	10552	27762	35928	23811	11623	10229	31295	34661	38627	3949	2847	3584	5434	7786	4950	4464	8227	28048	5678	10762	17290	17299	30381	55149	101595	176428	317631	389134	393008	364028	407833	421203	433826	397225	430865	436600	434828	378072	431651	436940
	731	4.33985	20635	12798	27572	36219	24698	10510	10335	46067	35016	44508	3322	3142	3498	3538	9378	4808	5705	9180	32566	6327	10479	17682	17445	30033	53738	100697	182865	326543	386461	396277	363706	406110	420481	436870	382310	433739	429332	429852	378072	431651	436940
	732	4.3458	21361	11909	27624	38104	24727	11438	10504	67132	34269	48550	3509	2888	3811	3939	7661	4919	4763	7710	39574	6747	12057	16603	17052	30170	54231	104895	180327	322847	380770	385439	353246	413862	424644	442480	392658	431721	437377	426946	378072	431651	436940
	733	4.35174	20240	11698	26749	35937	24693	11545	11367	81574	34785	52091	3831	4719	3818	3969	7785	4688	4953	8458	44762	6442	12161	18587	16735	29707	55810	102184	181994	320781	380998	393651	363521	408981	424216	449134	395604	427691	436097	430840	378072	431651	436940
	734	4.35769	17651	12086	24601	39313	25263	11754	10749	97682	34603	57927	3470	3275	3380	3929	7676	4897	4797	8818	41513	6141	10851	16655	16690	30298	58902	101775	181071	325445	383827	393326	355315	400593	422902	452866	391195	429864	423905	438030	378072	431651	436940
	735	4.36363	20358	10204	23472	39499	28187	11797	9630	112427	35717	57926	3478	2954	3553	5221	7572	4530	5032	8956	33557	8361	10551	18667	19184	30099	56245	109475	185097	326659	385298	387623	353130	408574	411250	452126	397330	422909	428008	427068	378072	431651	436940
	736	4.36958	20004	8874	21845	40525	25969	12173	8858	118481	33529	60240	3689	3337	3307	3938	8576	4617	6119	9567	20055	5856	9796	17313	17817	32081	58070	104393	182071	331451	382873	396616	354371	408051	419820	458171	397904	429368	425000	431550	378072	431651	436940
	737	4.37552	16790	9409	21732	39440	26549	11077	6597	121518	37037	56098	3539	3682	3577	5203	8739	4249	5015	11576	16207	6484	10910	17523	16814	29192	59203	107257	186862	330368	387672	389526	359630	406362	423941	472571	399246	431732	435004	435319	378072	431651	436940
	738	4.38147	16927	6735	19288	41738	27460	11484	5945	127015	37582	48511	3900	3682	3411	3586	7924	4507	4551	11800	15386	6668	10508	17521	16838	29862	63291	103803	192242	327827	397114	396842	363017	408759	413676	488678	408526	418215	425063	427892	378072	431651	436940
	739	4.38741	16131	8121	17282	41439	28838	11364	4230	133078	36421	41010	4079	3462	3628	3831	8822	4375	4723	12462	15295	6623	11076	17385	17906	30147	66134	111846	194248	324447	405094	383037	354241	409826	411856	493176	411538	421937	431990	434996	378072	431651	436940
	740	4.39336	18978	8466	14985	40971	29017	11213	4284	131819	38080	34652	4315	3353	3507	3825	7859	4893	4687	13395	17870	6639	10619	18339	15894	30407	67524	110822	195055	320132	416232	397481	366251	407888	414528	487921	414404	433060	433215	425145	378072	431651	436940
	741	4.3993	18999	7144	12681	41588	29894	11849	5226	129672	38928	27789	4554	3871	3225	3474	7754	5711	5040	14511	15318	7881	10519	20769	18457	29942	65723	107474	189099	327041	429676	396431	354044	409520	412941	497226	410402	428971	427455	438578	378072	431651	436940
	742	4.40525	21924	7763	11006	40681	30353	12374	5513	129213	40997	25136	4970	4832	2921	3404	8285	6382	4705	13066	15423	7037	11092	18260	17370	29817	64282	109725	195135	319692	443720	395454	352525	408206	425571	500899	416369	431159	436440	432779	378072	431651	436940
	743	4.41119	27779	6735	10075	42018	32579	13007	4318	133036	41069	16147	6284	3711	3193	3358	8345	3985	4415	12926	15886	8457	10709	17681	17436	30261	66782	109343	191381	327242	458249	391997	354038	411718	418543	484623	416253	429495	432825	432574	378072	431651	436940
	744	4.41714	36705	6847	8218	45318	34763	12125	3975	130754	41447	12349	5186	3464	4074	3728	8867	6088	4582	12187	15650	8120	12031	16677	18330	31151	62610	111567	195259	321262	455471	394260	357671	406146	410559	491282	415457	426907	435999	423191	378072	431651	436940
	745	4.42308	41891	6403	8855	44274	37209	12153	4096	126603	43462	9688	5541	3664	5189	3475	9999	4409	6194	10697	15961	13208	11580	15861	18436	31109	61895	108426	189998	321471	447938	396496	363580	410093	413322	485267	400566	421502	435590	433861	378072	431651	436940
	746	4.42903	42544	7764	6760	47365	39602	13011	4484	123124	42125	8182	6034	3552	7809	4597	9117	4535	4359	9691	15960	31933	10955	16415	17093	30033	62185	112914	191687	321669	435475	394513	355862	409457	407711	468783	405246	425767	435323	434411	378072	431651	436940
	747	4.43497	38162	7375	7673	45248	41654	12827	4300	122300	42540	4955	5673	3285	8867	3285	9376	6197	4779	9642	17316	59664	10858	15927	18556	32583	65317	113309	192401	327617	423539	400745	367313	400018	420932	460871	406800	432251	430811	427269	378072	431651	436940
	748	4.44092	35627	5986	5901	49784	46279	12757	3823	123265	44161	4619	5658	3605	13554	3823	8713	6097	3881	10037	17653	80053	12010	16078	17799	31461	61190	111755	196468	328366	403350	396823	354781	409738	419832	460845	407679	426245	433825	421180	378072	431651	436940
	749	4.44686	31430	7485	5940	49423	46075	12811	3998	119638	46540	4784	5701	3577	17171	4105	8714	4536	3926	8145	17122	75584	11337	16048	17808	32067	60925	112227	194589	327346	405932	399619	356756	407346	423380	458881	406120	420583	434311	431838	378072	431651	436940
	750	4.45281	30228	6106	4789	51086	44190	12859	5188	122039	47516	5484	5856	3557	21917	3548	8980	4465	3936	8777	16284	55516	10830	16428	18372	32658	61331	110092	188354	325235	400688	395844	359475	412955	411329	451465	410713	426763	422144	430874	378072	431651	436940
	751	4.45875	25919	5388	4758	50597	44817	12477	3359	122230	48658	8311	6870	4100	22657	3907	8431	4945	5814	8390	16620	36970	10899	17209	17344	31854	62902	113485	195244	327484	389108	392642	358880	403087	419907	455400	412663	425457	436330	433411	378072	431651	436940
	752	4.4647	23762	5012	4412	53659	43473	13114	4094	122972	49688	8946	4983	3896	21678	5132	8671	4339	5887	9122	16864	25034	12486	15994	16431	34062	64942	109625	191263	323215	401184	391125	363354	405303	410852	452993	413777	426037	425798	432448	378072	431651	436940
	753	4.47064	22498	6800	4661	57057	44378	14713	5684	121989	51961	12507	5516	3780	21227	3789	8542	3895	4155	9546	14476	18834	11167	17304	16462	33168	66584	107214	198206	332150	400264	396188	357346	407218	420363	451282	410195	425903	435146	427573	378072	431651	436940
	754	4.47659	22292	4943	3957	60596	40594	13609	4210	125140	47800	13244	6733	3505	17712	3706	8338	4351	4054	9821	13639	15124	10395	16272	16936	33484	69988	107730	197323	331380	389751	394375	361391	409982	421206	452736	414576	425654	424807	431872	378072	431651	436940
	755	4.48253	20389	6632	4218	63389	40355	14126	4403	121036	50714	15541	4960	4078	16532	4287	8232	4801	3910	10072	9247	14012	10443	16077	17271	35550	72060	107033	195135	332163	392674	398998	366352	399726	410684	455987	410879	419624	434749	434708	378072	431651	436940
	756	4.48848	19048	5306	4400	65830	40718	13641	4148	123368	53041	17604	5939	3525	13284	4198	7737	4352	4296	12184	7258	13838	10813	17051	17345	32795	75959	110772	195877	325254	402468	396044	355843	401956	421674	446538	410743	423051	429927	433233	378072	431651	436940
	757	4.49442	19691	5586	4331	68666	40837	15624	4228	127833	50121	18772	6933	3913	11641	3680	7815	5909	4499	11293	7325	11224	12696	16857	19214	32223	82235	113675	202679	333482	402051	386138	365496	409316	414725	457548	406109	429744	430442	434156	378072	431651	436940
	758	4.50037	17599	5240	4696	68671	42972	13117	5140	127346	51785	20014	5576	3454	9711	5169	7991	4129	3551	10482	6879	11178	11904	18684	16686	34912	83423	111587	200135	334797	413545	398139	361968	408293	417500	448996	404631	426832	435045	435694	378072	431651	436940
	759	4.50631	16483	5387	4254	67856	41055	15034	3606	125513	51921	20704	7143	3623	7473	3533	7798	4069	4123	10696	7385	10684	11763	15744	18227	34258	82408	109943	205077	325158	428259	398356	358802	408473	416997	460046	403698	414489	434975	429417	378072	431651	436940
	760	4.51226	15691	6112	4186	68369	41986	15333	4854	126616	51274	20226	5334	4485	7128	3736	7399	4631	4028	10821	6844	11395	11858	18725	16777	31879	81404	112027	205765	333281	442864	388027	364538	411190	419998	454320	396610	426197	432346	427320	378072	431651	436940
	761	4.5182	16303	5681	4214	67150	42187	15114	2977	124389	50607	22910	5832	3424	7552	3532	8059	4152	4190	10537	6916	10050	11624	16613	17792	33928	76068	113150	201193	325217	477502	393975	363220	402284	420381	454204	396842	427340	424047	432950	378072	431651	436940
	762	4.52415	15127	5581	4781	69678	42134	15925	3002	125597	52815	23689	5587	4911	5368	3980	10122	4044	5966	10039	7572	9532	11931	16831	17739	33178	73053	113024	207910	336692	491283	398448	358005	409862	418804	452427	391962	429115	432895	438416	378072	431651	436940
	763	4.53009	14069	7018	5861	70040	44760	16010	2656	123248	53061	21912	5617	3412	5329	3827	10195	4312	4219	9388	8793	9350	14960	17455	19572	33910	69686	115516	209520	336872	502025	392740	357137	409776	415822	440774	390262	420871	438745	434256	378072	431651	436940
	764	4.53604	13883	7023	4181	70760	47776	15169	4264	122812	53855	22564	5974	2904	4646	3839	11854	4446	4350	9576	8095	9373	12470	16372	17498	32068	68581	118162	209633	335046	503880	391567	357959	403561	417213	431037	385340	427293	432229	435268	378072	431651	436940
	765	4.54198	12768	6398	4382	72008	46954	16307	2841	124913	55842	22524	5589	3417	4548	3997	12657	4316	4053	8814	8883	9191	12166	16934	17682	33133	66257	116824	203736	326224	495028	386441	353030	399706	419967	434037	390943	428248	430728	436612	378072	431651	436940
	766	4.54793	12500	7485	4390	75479	46934	16135	2666	124486	53070	23049	5490	3680	4379	3981	11118	4155	4378	8745	8178	10296	12264	16978	16846	32681	65383	116415	203408	335073	475574	395862	357386	406092	427773	425444	387810	427945	434446	438414	378072	431651	436940
	767	4.55387	12329	6064	6203	74764	49312	17232	3338	125585	56998	21613	5229	2896	4250	3355	11401	4015	5743	8521	8079	14065	13912	16168	19436	35607	67555	114808	205301	335805	448592	399881	356594	401344	416220	434179	389199	425314	430232	433479	378072	431651	436940
	768	4.55982	12528	7594	4723	76560	49328	16013	2888	123175	52438	22150	5749	2894	3807	5019	12488	4203	4398	7749	8690	29794	12394	17169	17745	31132	64960	116984	208695	323669	435128	393955	359164	404947	422030	435780	380951	427718	435039	436586	378072	431651	436940
	769	4.56576	13392	6434	6347	75265	50774	17601	4239	128214	52005	21732	5159	3076	4145	3897	10764	4273	3789	7943	8979	67176	13023	16622	16905	33459	68122	114866	205355	321970	413412	396467	347611	403621	424192	427240	389451	424279	427568	433583	378072	431651	436940
	770	4.57171	12066	6644	5088	76206	51691	16549	4298	127103	54793	23085	5784	3257	3781	4090	10100	4710	5755	7470	9847	136005	12470	16223	17427	32911	66187	115035	211875	331414	417481	395513	359674	411007	420723	430143	389751	429250	433213	435553	378072	431651	436940
	771	4.57765	13551	6146	4376	77585	52210	17316	3178	130497	54441	23557	6600	3223	4670	3962	9309	4305	4004	7322	11340	233647	12550	15965	17539	33414	67095	120685	206152	324799	413426	395245	358017	410446	409287	431300	385591	424630	431644	439205	378072	431651	436940
	772	4.5836	12229	8107	4972	73596	55060	17340	4169	129216	55318	25852	5486	4405	4202	3908	8711	4320	4094	8235	14052	338884	12604	15536	17361	34299	65687	122456	207762	333119	415646	396860	360921	409358	410535	425245	391241	427468	432567	439205	378072	431651	436940
	773	4.58954	13489	6571	4939	75151	55016	17002	2488	132614	56417	23334	6699	3001	4004	3555	8116	5966	4130	7655	17152	415141	12517	16145	17289	36133	64125	118444	214329	323673	422377	397008	362191	401511	423088	436820	387175	426876	429048	439205	378072	431651	436940
	774	4.59549	12940	6317	4681	77014	56909	17948	2775	133173	58147	23905	5395	2914	4090	3746	7436	4301	3657	8014	18180	424670	11765	15740	18898	34837	65673	118813	208063	336809	421314	395422	364734	414021	421922	435319	381122	428456	431154	439205	378072	431651	436940
	775	4.60143	11508	7269	4999	75961	57820	17781	4336	130390	58391	21541	4753	3547	5272	3753	7655	4194	4191	7136	18219	380765	12593	15200	17270	34588	69274	122248	213867	329373	441507	389830	361855	412199	422450	437093	383956	426935	432602	439205	378072	431651	436940
	776	4.60738	10826	4766	5468	76909	59125	17674	3179	128871	55393	19109	4930	3512	3133	3657	7824	3932	3946	7031	16998	292072	13188	16000	17814	35349	66229	122502	210788	331657	443444	403255	361485	400388	424277	434280	394429	428110	424401	439205	378072	431651	436940
	777	4.61332	12190	5114	6333	77943	61094	16934	3084	127973	55368	18521	4838	3207	3370	4356	8822	4384	3875	6849	14274	192668	14750	16044	16631	37003	66162	119885	212273	338655	463882	385494	353452	404668	423236	438004	396900	429642	436120	439205	378072	431651	436940
	778	4.61927	12429	3334	6638	77036	61476	14826	4099	130852	48897	16244	5055	3120	3453	3864	6935	5647	3794	7710	14601	115491	18430	17335	16293	36323	66753	121251	215191	339639	470709	386586	358790	409416	420458	442866	390171	427371	431710	439205	378072	431651	436940
	779	4.62521	10832	3457	6758	78876	61816	10831	2950	126721	44209	13105	5482	3286	3425	4799	8909	5702	3869	7088	11725	67805	18505	13969	17069	35723	67120	119229	223624	343920	472896	397656	354111	410142	408620	442569	398723	420724	422648	439205	378072	431651	436940
	780	4.63116	11103	3225	5427	76729	63192	8230	3304	128466	37999	8926	6243	4485	3426	5835	7516	4334	3861	7948	10806	41756	19232	17430	16914	33829	70911	120136	211342	332095	477062	396761	361939	399380	421262	433728	402258	427091	425574	439205	378072	431651	436940
	781	4.6371	11045	4327	5720	76739	63713	5073	4190	127349	32659	7018	4666	3173	3364	5947	6929	4199	4289	7246	10342	27550	18785	15408	17941	36072	70248	120976	219956	339768	473744	400579	364207	413525	417927	434312	409723	427724	431708	439205	378072	431651	436940
[truncated: 60 more rows]

## Sheet: HC 1 min
			The raw data obtained from 5 runs (shown in different colors) for the overall comprehensive analysis using 1.00 min H/C window
[truncated: 846 more rows]
[truncated: 4 more columns]

[truncated: 2 more sheets: HC 0.5 min, HC 0.2 min]
