# Supplementary material for: Strategies towards simpler configuration and higher peak capacity with comprehensive multidimensional gas chromatography
Source: Royal Society of Chemistry journal article supplement (doi:10.1039/d0ra10495g), 2021-01-01
Supplement: d0ra10495g2.pdf [file d0ra10495g2.pdf]

## Supplementary material

**Manuscript Title:** Strategies towards simpler configuration and higher peak capacity with comprehensive multidimensional gas chromatography

Pannipa Janta,<sup>a</sup> Duangkamol Pinyo,<sup>b</sup> Yamonporn Yodta,<sup>b</sup> Porames Vasasiri,<sup>b</sup> Meinolf Weidenbach,<sup>c</sup> Matthias Pursch,<sup>d</sup> Xiuhan (Grace) Yang\*<sup>e</sup> and Chadin Kulsing\*<sup>af</sup>

<sup>a</sup> Department of Chemistry, Faculty of Science, Chulalongkorn University, Bangkok 10330, Thailand

<sup>b</sup> The Center for Advanced Analytical Technology, Dow Chemical Thailand Ltd, Map Ta Phut Industrial Estate, Rayong 21150, Thailand

<sup>c</sup> Polyurethanes Tech Center, Dow Deutschland Anlagen GmbH, 21677 Stade, Germany

<sup>d</sup> Dow Chemical China Investment Company, Shanghai 201203, China

<sup>e</sup> Analytical Science, Dow Deutschland Anlagen GmbH, 21677 Stade, Germany

<sup>f</sup> Chromatographic Separation and Flavor Chemistry Research Unit and Center of Molecular Sensory Science, Department of Chemistry, Faculty of Science, Chulalongkorn University, Bangkok 10330, Thailand

**Table S-1.** The valve control programs for different heartcut events applied in each comprehensive H/C analysis.

| <b>H/C window 5 min</b>                                  |    |
|----------------------------------------------------------|----|
| <b>No. of experiment = <math>5 \div 5 = 1</math> Run</b> |    |
| Start (min) 8.5                                          | On |
| 13.5                                                     | On |
| 18.5                                                     | On |
| 23.5                                                     | On |
| 28.5                                                     | On |
| 33.5                                                     | On |
| 38.5                                                     | On |
| 43.5                                                     | On |
| End (min) 48.5                                           | On |

| <b>H/C window 2.5 min</b>                                   |       |      |       |
|-------------------------------------------------------------|-------|------|-------|
| <b>No. of experiment = <math>5 \div 2.5 = 2</math> Runs</b> |       |      |       |
|                                                             | Run 1 |      | Run 2 |
| Start (min) 8.5                                             | On    | 11   | On    |
| 11                                                          | Off   | 13.5 | Off   |
| 13.5                                                        | On    | 16   | On    |
| 16                                                          | Off   | 18.5 | Off   |
| 18.5                                                        | On    | 21   | On    |
| 21                                                          | Off   | 23.5 | Off   |
| 23.5                                                        | On    | 26   | On    |
| 26                                                          | Off   | 28.5 | Off   |
| 28.5                                                        | On    | 31   | On    |
| 31                                                          | Off   | 33.5 | Off   |
| 33.5                                                        | On    | 36   | On    |
| 36                                                          | Off   | 38.5 | Off   |
| 38.5                                                        | On    | 41   | On    |
| 41                                                          | Off   | 43.5 | Off   |
| 43.5                                                        | On    | 46   | On    |
| 46                                                          | Off   | 48.5 | Off   |
| 48.5                                                        | On    | 51   | On    |
| End (min) 51                                                | Off   | 53.5 | Off   |

| <b>H/C 1.25 min</b>                                          |       |       |       |       |       |       |       |     |
|--------------------------------------------------------------|-------|-------|-------|-------|-------|-------|-------|-----|
| <b>No. of experiment = <math>5 \div 1.25 = 4</math> Runs</b> |       |       |       |       |       |       |       |     |
| Run 1                                                        |       | Run 2 |       | Run 3 |       | Run 4 |       |     |
| Start (min)                                                  | 8.5   | On    | 9.75  | On    | 11    | On    | 12.25 | On  |
|                                                              | 9.75  | Off   | 11    | Off   | 12.25 | Off   | 13.5  | Off |
|                                                              | 13.5  | On    | 14.75 | On    | 16    | On    | 17.25 | On  |
|                                                              | 14.75 | Off   | 16    | Off   | 17.25 | Off   | 18.5  | Off |
|                                                              | 18.5  | On    | 19.75 | On    | 21    | On    | 22.25 | On  |
|                                                              | 19.75 | Off   | 21    | Off   | 22.25 | Off   | 23.5  | Off |
|                                                              | 23.5  | On    | 24.75 | On    | 26    | On    | 27.25 | On  |
|                                                              | 24.75 | Off   | 26    | Off   | 27.25 | Off   | 28.5  | Off |
|                                                              | 28.5  | On    | 29.75 | On    | 31    | On    | 32.25 | On  |
|                                                              | 29.75 | Off   | 31    | Off   | 32.25 | Off   | 33.5  | Off |
|                                                              | 33.5  | On    | 34.75 | On    | 36    | On    | 37.25 | On  |
|                                                              | 34.75 | Off   | 36    | Off   | 37.25 | Off   | 38.5  | Off |
|                                                              | 38.5  | On    | 39.75 | On    | 41    | On    | 42.25 | On  |
|                                                              | 39.75 | Off   | 41    | Off   | 42.25 | Off   | 43.5  | Off |
|                                                              | 43.5  | On    | 44.75 | On    | 46    | On    | 47.25 | On  |
|                                                              | 44.75 | Off   | 46    | Off   | 47.25 | Off   | 48.5  | Off |
|                                                              | 48.5  | On    | 49.75 | On    | 51    | On    | 52.25 | On  |
| End (min)                                                    | 49.75 | Off   | 51    | Off   | 52.25 | Off   | 53.5  | Off |

| <b>H/C 1 min</b>                        |     |       |     |       |     |       |     |       |     |
|-----------------------------------------|-----|-------|-----|-------|-----|-------|-----|-------|-----|
| <b>No. of experiment = 5÷1 = 5 Runs</b> |     |       |     |       |     |       |     |       |     |
| Run 1                                   |     | Run 2 |     | Run 3 |     | Run 4 |     | Run 5 |     |
| Start (min) 8.5                         | On  | 9.5   | On  | 10.5  | On  | 11.5  | On  | 12.5  | On  |
| 9.5                                     | Off | 10.5  | Off | 11.5  | Off | 12.5  | Off | 13.5  | Off |
| 13.5                                    | On  | 14.5  | On  | 15.5  | On  | 16.5  | On  | 17.5  | On  |
| 14.5                                    | Off | 15.5  | Off | 16.5  | Off | 17.5  | Off | 18.5  | Off |
| 18.5                                    | On  | 19.5  | On  | 20.5  | On  | 21.5  | On  | 22.5  | On  |
| 19.5                                    | Off | 20.5  | Off | 21.5  | Off | 22.5  | Off | 23.5  | Off |
| 23.5                                    | On  | 24.5  | On  | 25.5  | On  | 26.5  | On  | 27.5  | On  |
| 24.5                                    | Off | 25.5  | Off | 26.5  | Off | 27.5  | Off | 28.5  | Off |
| 28.5                                    | On  | 29.5  | On  | 30.5  | On  | 31.5  | On  | 32.5  | On  |
| 29.5                                    | Off | 30.5  | Off | 31.5  | Off | 32.5  | Off | 33.5  | Off |
| 33.5                                    | On  | 34.5  | On  | 35.5  | On  | 36.5  | On  | 37.5  | On  |
| 34.5                                    | Off | 35.5  | Off | 36.5  | Off | 37.5  | Off | 38.5  | Off |
| 38.5                                    | On  | 39.5  | On  | 40.5  | On  | 41.5  | On  | 42.5  | On  |
| 39.5                                    | Off | 40.5  | Off | 41.5  | Off | 42.5  | Off | 43.5  | Off |
| 43.5                                    | On  | 44.5  | On  | 45.5  | On  | 46.5  | On  | 47.5  | On  |
| 44.5                                    | Off | 45.5  | Off | 46.5  | Off | 47.5  | Off | 48.5  | Off |
| 48.5                                    | On  | 49.5  | On  | 50.5  | On  | 51.5  | On  | 52.5  | On  |
| End (min) 49.5                          | Off | 50.5  | Off | 51.5  | Off | 52.5  | Off | 53.5  | Off |

---

**H/C 0.5 min****No. of experiment =  $5 \div 0.5 = 10$  Runs**

---

| Run 1           | Run 2    | Run 3   | Run 4    | Run 5   | Run 6    | Run 7   | Run 8    | Run 9   | Run 10   |
|-----------------|----------|---------|----------|---------|----------|---------|----------|---------|----------|
| Start (min) 8.5 | On 9     | On 9.5  | On 10    | On 10.5 | On 11    | On 11.5 | On 12    | On 12.5 | On 13    |
| 9               | Off 9.5  | Off 10  | Off 10.5 | Off 11  | Off 11.5 | Off 12  | Off 12.5 | Off 13  | Off 13.5 |
| 13.5            | On 14    | On 14.5 | On 15    | On 15.5 | On 16    | On 16.5 | On 17    | On 17.5 | On 18    |
| 14              | Off 14.5 | Off 15  | Off 15.5 | Off 16  | Off 16.5 | Off 17  | Off 17.5 | Off 18  | Off 18.5 |
| 18.5            | On 19    | On 19.5 | On 20    | On 20.5 | On 21    | On 21.5 | On 22    | On 22.5 | On 23    |
| 19              | Off 19.5 | Off 20  | Off 20.5 | Off 21  | Off 21.5 | Off 22  | Off 22.5 | Off 23  | Off 23.5 |
| 23.5            | On 24    | On 24.5 | On 25    | On 25.5 | On 26    | On 26.5 | On 27    | On 27.5 | On 28    |
| 24              | Off 24.5 | Off 25  | Off 25.5 | Off 26  | Off 26.5 | Off 27  | Off 27.5 | Off 28  | Off 28.5 |
| 28.5            | On 29    | On 29.5 | On 30    | On 30.5 | On 31    | On 31.5 | On 32    | On 32.5 | On 33    |
| 29              | Off 29.5 | Off 30  | Off 30.5 | Off 31  | Off 31.5 | Off 32  | Off 32.5 | Off 33  | Off 33.5 |
| 33.5            | On 34    | On 34.5 | On 35    | On 35.5 | On 36    | On 36.5 | On 37    | On 37.5 | On 38    |
| 34              | Off 34.5 | Off 35  | Off 35.5 | Off 36  | Off 36.5 | Off 37  | Off 37.5 | Off 38  | Off 38.5 |
| 38.5            | On 39    | On 39.5 | On 40    | On 40.5 | On 41    | On 41.5 | On 42    | On 42.5 | On 43    |
| 39              | Off 39.5 | Off 40  | Off 40.5 | Off 41  | Off 41.5 | Off 42  | Off 42.5 | Off 43  | Off 43.5 |
| 43.5            | On 44    | On 44.5 | On 45    | On 45.5 | On 46    | On 46.5 | On 47    | On 47.5 | On 48    |
| 44              | Off 44.5 | Off 45  | Off 45.5 | Off 46  | Off 46.5 | Off 47  | Off 47.5 | Off 48  | Off 48.5 |
| 48.5            | On 49    | On 49.5 | On 50    | On 50.5 | On 51    | On 51.5 | On 52    | On 52.5 | On 53    |
| End (min) 49    | Off 49.5 | Off 50  | Off 50.5 | Off 51  | Off 51.5 | Off 52  | Off 52.5 | Off 53  | Off 53.5 |

---

**H/C 0.2 min**  
**No. of experiment =  $5 \div 0.2 = 25$  Runs**

| Run 1           |     | Run 2 |     | Run 3 |     | Run 4 |     | Run 5 |     | Run 6 |     | Run 7 |     | Run 8 |     | Run 9 |     | Run 10 |     | Run 11 |     | Run 12 |     | Run 13 |     |
|-----------------|-----|-------|-----|-------|-----|-------|-----|-------|-----|-------|-----|-------|-----|-------|-----|-------|-----|--------|-----|--------|-----|--------|-----|--------|-----|
| Start (min) 8.5 | On  | 8.7   | On  | 8.9   | On  | 9.1   | On  | 9.3   | On  | 9.5   | On  | 9.7   | On  | 9.9   | On  | 10.1  | On  | 10.3   | On  | 10.5   | On  | 10.7   | On  | 10.9   | On  |
| 8.7             | Off | 8.9   | Off | 9.1   | Off | 9.3   | Off | 9.5   | Off | 9.7   | Off | 9.9   | Off | 10.1  | Off | 10.3  | Off | 10.5   | Off | 10.7   | Off | 10.9   | Off | 11.1   | Off |
| 13.5            | On  | 13.7  | On  | 13.9  | On  | 14.1  | On  | 14.3  | On  | 14.5  | On  | 14.7  | On  | 14.9  | On  | 15.1  | On  | 15.3   | On  | 15.5   | On  | 15.7   | On  | 15.9   | On  |
| 13.7            | Off | 13.9  | Off | 14.1  | Off | 14.3  | Off | 14.5  | Off | 14.7  | Off | 14.9  | Off | 15.1  | Off | 15.3  | Off | 15.5   | Off | 15.7   | Off | 15.9   | Off | 16.1   | Off |
| 18.5            | On  | 18.7  | On  | 18.9  | On  | 19.1  | On  | 19.3  | On  | 19.5  | On  | 19.7  | On  | 19.9  | On  | 20.1  | On  | 20.3   | On  | 20.5   | On  | 20.7   | On  | 20.9   | On  |
| 18.7            | Off | 18.9  | Off | 19.1  | Off | 19.3  | Off | 19.5  | Off | 19.7  | Off | 19.9  | Off | 20.1  | Off | 20.3  | Off | 20.5   | Off | 20.7   | Off | 20.9   | Off | 21.1   | Off |
| 23.5            | On  | 23.7  | On  | 23.9  | On  | 24.1  | On  | 24.3  | On  | 24.5  | On  | 24.7  | On  | 24.9  | On  | 25.1  | On  | 25.3   | On  | 25.5   | On  | 25.7   | On  | 25.9   | On  |
| 23.7            | Off | 23.9  | Off | 24.1  | Off | 24.3  | Off | 24.5  | Off | 24.7  | Off | 24.9  | Off | 25.1  | Off | 25.3  | Off | 25.5   | Off | 25.7   | Off | 25.9   | Off | 26.1   | Off |
| 28.5            | On  | 28.7  | On  | 28.9  | On  | 29.1  | On  | 29.3  | On  | 29.5  | On  | 29.7  | On  | 29.9  | On  | 30.1  | On  | 30.3   | On  | 30.5   | On  | 30.7   | On  | 30.9   | On  |
| 28.7            | Off | 28.9  | Off | 29.1  | Off | 29.3  | Off | 29.5  | Off | 29.7  | Off | 29.9  | Off | 30.1  | Off | 30.3  | Off | 30.5   | Off | 30.7   | Off | 30.9   | Off | 31.1   | Off |
| 33.5            | On  | 33.7  | On  | 33.9  | On  | 34.1  | On  | 34.3  | On  | 34.5  | On  | 34.7  | On  | 34.9  | On  | 35.1  | On  | 35.3   | On  | 35.5   | On  | 35.7   | On  | 35.9   | On  |
| 33.7            | Off | 33.9  | Off | 34.1  | Off | 34.3  | Off | 34.5  | Off | 34.7  | Off | 34.9  | Off | 35.1  | Off | 35.3  | Off | 35.5   | Off | 35.7   | Off | 35.9   | Off | 36.1   | Off |
| 38.5            | On  | 38.7  | On  | 38.9  | On  | 39.1  | On  | 39.3  | On  | 39.5  | On  | 39.7  | On  | 39.9  | On  | 40.1  | On  | 40.3   | On  | 40.5   | On  | 40.7   | On  | 40.9   | On  |
| 38.7            | Off | 38.9  | Off | 39.1  | Off | 39.3  | Off | 39.5  | Off | 39.7  | Off | 39.9  | Off | 40.1  | Off | 40.3  | Off | 40.5   | Off | 40.7   | Off | 40.9   | Off | 41.1   | Off |
| 43.5            | On  | 43.7  | On  | 43.9  | On  | 44.1  | On  | 44.3  | On  | 44.5  | On  | 44.7  | On  | 44.9  | On  | 45.1  | On  | 45.3   | On  | 45.5   | On  | 45.7   | On  | 45.9   | On  |
| 43.7            | Off | 43.9  | Off | 44.1  | Off | 44.3  | Off | 44.5  | Off | 44.7  | Off | 44.9  | Off | 45.1  | Off | 45.3  | Off | 45.5   | Off | 45.7   | Off | 45.9   | Off | 46.1   | Off |
| 48.5            | On  | 48.7  | On  | 48.9  | On  | 49.1  | On  | 49.3  | On  | 49.5  | On  | 49.7  | On  | 49.9  | On  | 50.1  | On  | 50.3   | On  | 50.5   | On  | 50.7   | On  | 50.9   | On  |
| End (min) 48.7  | Off | 48.9  | Off | 49.1  | Off | 49.3  | Off | 49.5  | Off | 49.7  | Off | 49.9  | Off | 50.1  | Off | 50.3  | Off | 50.5   | Off | 50.7   | Off | 50.9   | Off | 51.1   | Off |

**H/C 0.2 min (Continued)**  
**No. of experiment =  $5 \div 0.2 = 25$  Run**

| Run 14           |     | Run 15 |     | Run 16 |     | Run 17 |     | Run 18 |     | Run 19 |     | Run 20 |     | Run 21 |     | Run 22 |     | Run 23 |     | Run 24 |     | Run 25 |     |
|------------------|-----|--------|-----|--------|-----|--------|-----|--------|-----|--------|-----|--------|-----|--------|-----|--------|-----|--------|-----|--------|-----|--------|-----|
| Start (min) 11.1 | On  | 11.3   | On  | 11.5   | On  | 11.7   | On  | 11.9   | On  | 12.1   | On  | 12.3   | On  | 12.5   | On  | 12.7   | On  | 12.9   | On  | 13.1   | On  | 13.3   | On  |
| 11.3             | Off | 11.5   | Off | 11.7   | Off | 11.9   | Off | 12.1   | Off | 12.3   | Off | 12.5   | Off | 12.7   | Off | 12.9   | Off | 13.1   | Off | 13.3   | Off | 13.5   | Off |
| 16.1             | On  | 16.3   | On  | 16.5   | On  | 16.7   | On  | 16.9   | On  | 17.1   | On  | 17.3   | On  | 17.5   | On  | 17.7   | On  | 17.9   | On  | 18.1   | On  | 18.3   | On  |
| 16.3             | Off | 16.5   | Off | 16.7   | Off | 16.9   | Off | 17.1   | Off | 17.3   | Off | 17.5   | Off | 17.7   | Off | 17.9   | Off | 18.1   | Off | 18.3   | Off | 18.5   | Off |
| 21.1             | On  | 21.3   | On  | 21.5   | On  | 21.7   | On  | 21.9   | On  | 22.1   | On  | 22.3   | On  | 22.5   | On  | 22.7   | On  | 22.9   | On  | 23.1   | On  | 23.3   | On  |
| 21.3             | Off | 21.5   | Off | 21.7   | Off | 21.9   | Off | 22.1   | Off | 22.3   | Off | 22.5   | Off | 22.7   | Off | 22.9   | Off | 23.1   | Off | 23.3   | Off | 23.5   | Off |
| 26.1             | On  | 26.3   | On  | 26.5   | On  | 26.7   | On  | 26.9   | On  | 27.1   | On  | 27.3   | On  | 27.5   | On  | 27.7   | On  | 27.9   | On  | 28.1   | On  | 28.3   | On  |
| 26.3             | Off | 26.5   | Off | 26.7   | Off | 26.9   | Off | 27.1   | Off | 27.3   | Off | 27.5   | Off | 27.7   | Off | 27.9   | Off | 28.1   | Off | 28.3   | Off | 28.5   | Off |
| 31.1             | On  | 31.3   | On  | 31.5   | On  | 31.7   | On  | 31.9   | On  | 32.1   | On  | 32.3   | On  | 32.5   | On  | 32.7   | On  | 32.9   | On  | 33.1   | On  | 33.3   | On  |
| 31.3             | Off | 31.5   | Off | 31.7   | Off | 31.9   | Off | 32.1   | Off | 32.3   | Off | 32.5   | Off | 32.7   | Off | 32.9   | Off | 33.1   | Off | 33.3   | Off | 33.5   | Off |
| 36.1             | On  | 36.3   | On  | 36.5   | On  | 36.7   | On  | 36.9   | On  | 37.1   | On  | 37.3   | On  | 37.5   | On  | 37.7   | On  | 37.9   | On  | 38.1   | On  | 38.3   | On  |
| 36.3             | Off | 36.5   | Off | 36.7   | Off | 36.9   | Off | 37.1   | Off | 37.3   | Off | 37.5   | Off | 37.7   | Off | 37.9   | Off | 38.1   | Off | 38.3   | Off | 38.5   | Off |
| 41.1             | On  | 41.3   | On  | 41.5   | On  | 41.7   | On  | 41.9   | On  | 42.1   | On  | 42.3   | On  | 42.5   | On  | 42.7   | On  | 42.9   | On  | 43.1   | On  | 43.3   | On  |
| 41.3             | Off | 41.5   | Off | 41.7   | Off | 41.9   | Off | 42.1   | Off | 42.3   | Off | 42.5   | Off | 42.7   | Off | 42.9   | Off | 43.1   | Off | 43.3   | Off | 43.5   | Off |
| 46.1             | On  | 46.3   | On  | 46.5   | On  | 46.7   | On  | 46.9   | On  | 47.1   | On  | 47.3   | On  | 47.5   | On  | 47.7   | On  | 47.9   | On  | 48.1   | On  | 48.3   | On  |
| 46.3             | Off | 46.5   | Off | 46.7   | Off | 46.9   | Off | 47.1   | Off | 47.3   | Off | 47.5   | Off | 47.7   | Off | 47.9   | Off | 48.1   | Off | 48.3   | Off | 48.5   | Off |
| 51.1             | On  | 51.3   | On  | 51.5   | On  | 51.7   | On  | 51.9   | On  | 52.1   | On  | 52.3   | On  | 52.5   | On  | 52.7   | On  | 52.9   | On  | 53.1   | On  | 53.3   | On  |
| End (min) 51.3   | Off | 51.5   | Off | 51.7   | Off | 51.9   | Off | 52.1   | Off | 52.3   | Off | 52.5   | Off | 52.7   | Off | 52.9   | Off | 53.1   | Off | 53.3   | Off | 53.5   | Off |

## **Investigation of experimental conditions in GC×GC**

GC×GC employed long <sup>1</sup>D column (30 m) and short <sup>2</sup>D column (5 m) enabling fast <sup>2</sup>D separation of technical glycol precursor sample (with compounds elution time mostly distributing within a window of 6 s). As a result, comprehensive analysis was performed within a single run (a single injection). Flow modulator was applied in this approach which requires high <sup>2</sup>D flow for effective modulation process [15, 16]. The outlet flow was thus split to decrease flow to MS by using DS as a splitter [17] as shown in **Fig. 1A**. The flow was further reduced by use of a longer restrictor with the same I.D. to MS.

### ***Effects of injection time and <sup>2</sup>D column flow***

With a constant <sup>1</sup>D flow of 0.8 mL/min, different injection times and <sup>2</sup>D column flows were investigated in this study. The corresponding GC×GC results were evaluated according to  $n_c$  (related to average peak width), total peak area (indicating greater peak focusing effect during the modulation) and the number of identified compounds as shown in **Fig. S1**. Change of modulator injection time and <sup>2</sup>D flow in GC×GC significantly affected  ${}^2w_{b,ave}$  and total intensity (see <sup>2</sup>D width at blob base and total volume data in **Fig. S1A** and **S1B**); whilst,  ${}^1w_{b,ave}$  slightly varied as shown by similar <sup>1</sup>D width at blob base values plotted in **Fig. S1C**.



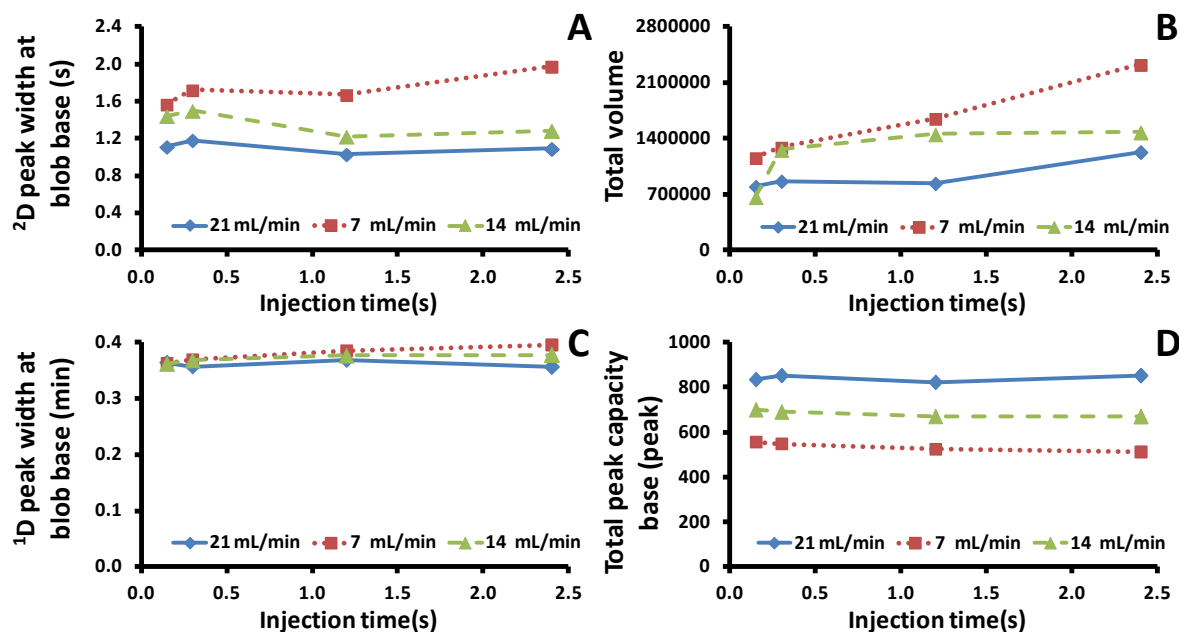

Fig

. S1. Effects of modulator injection time on separation performance using different <sup>2</sup>D column flows: 21, 14 and 7 mL min<sup>-1</sup> (♦, Δ and □, respectively).

With a constant <sup>2</sup>D flow of 21 mL min<sup>-1</sup>, different modulator injection time was applied with the results shown in Fig. S2. Injection time is a period in which a pulse from the end of <sup>1</sup>D column is filled into the channel inside the modulator prior to injection onto <sup>2</sup>D column. This is a critical parameter in GC×GC which could cause peak dispersion or breakthrough during the modulation process. With the studied conditions, too short injection time (0.15 s) could cause peak fronting as shown by the downward plateau of the peaks located between 20-30 min <sup>1</sup>t<sub>R</sub> in Fig. S2; whilst, too long injection time (2.40 s) led to peak tailing (e.g. see the upward plateau of the peaks located between 20-30 min <sup>1</sup>t<sub>R</sub> in Fig. S2). An effective injection time was selected to be 0.60 s reducing effects of peak broadening as shown by the minimum <sup>2</sup>D width at blob base (<sup>2</sup>w<sub>b,ave</sub>) with the 2D flows of 21 and 14 mL min<sup>-1</sup> in Fig. S1A

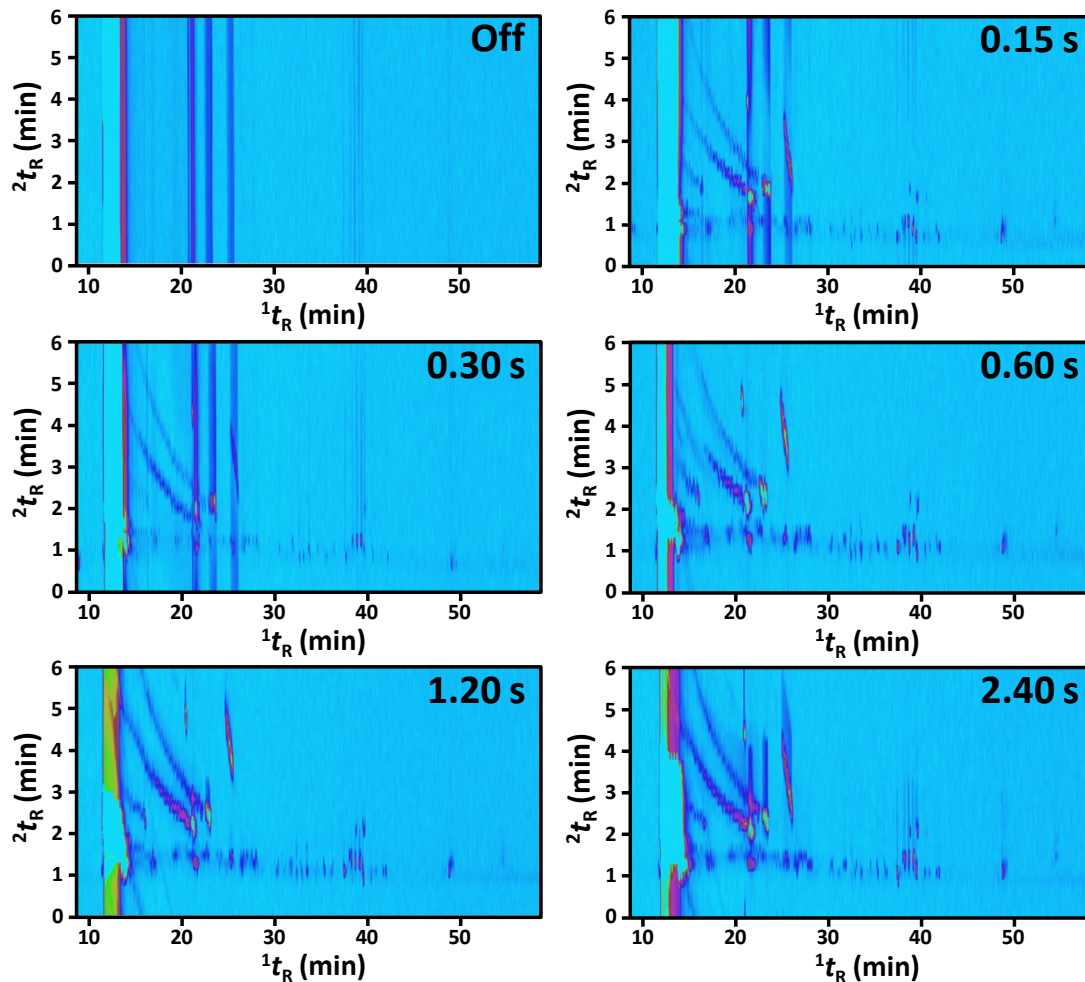

**Fig. S2.** GC×GC results obtained by using different injection time (0.15-2.40 s) using a constant  $^1D$  and  $^2D$  column flows of 0.8 and 21 mL min<sup>-1</sup>, respectively.

It should be noted that a suitable condition cannot be only that resulting in the best performance, *e.g.* with the highest  $n_c$  at 21 mL min<sup>-1</sup> of  $^2D$  flow and 0.60 s injection time (**Fig. S1D**) or highest total volume (total intensity) at 7 mL min<sup>-1</sup> of  $^2D$  flow and 0.60 s injection time (**Fig. S1D**). Other factors need to be taken into account. Use of high pressure at the modulator is required for effective modulation process (*e.g.* well focused peaks or prevention of leakage), which resulted in high  $^2D$  flow. However, low flow is required to preserve lifetime of MS vacuum pump and improved sensitivity, as well as providing effective flow of 20-40 cm s<sup>-1</sup> with He as carrier gas. The  $^2D$  flow

should thus be decreased. However, too low <sup>2</sup>D flow also causes ineffective modulation process, *e.g.* further resulting in weak focussing effect or peak splitting, and peak broadening. With a constant injection time of 0.6 s, different <sup>2</sup>D flow was applied with the results shown in **Fig. S3**.

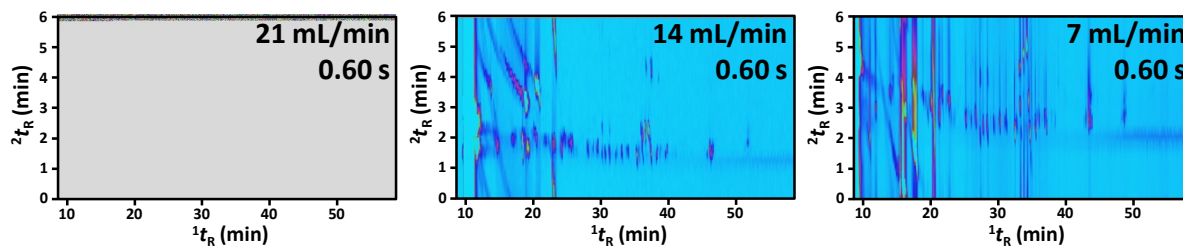

**Fig. S3.** GC×GC results obtained by using different <sup>2</sup>D column flow (21, 14 and 7 mL min<sup>-1</sup>) using a constant <sup>1</sup>D column flow and injection time of 0.8 mL min<sup>-1</sup> and 0.60 s, respectively.

The result showed improved separation (also with broader peaks) at lower flow due to the increasing void time. However, modulation performance decreased at the lower <sup>2</sup>D column flow as can be seen with the significantly broader peak width in <sup>2</sup>D separation, see the larger <sup>2</sup>D width at blob base ( $^2w_{b,ave}$ ) by using <sup>2</sup>D flow of 7 mL min<sup>-1</sup> in **Fig. S1A**, as well as the split peaks (*e.g.* that after 40 min) by this flow in **Fig. S1**. Based on the improved separation performance with significantly high intensity and low <sup>2</sup>D flow, 14 mL min<sup>-1</sup> of <sup>2</sup>D flow and 0.60 s of injection time were selected for further analysis with compound identification.

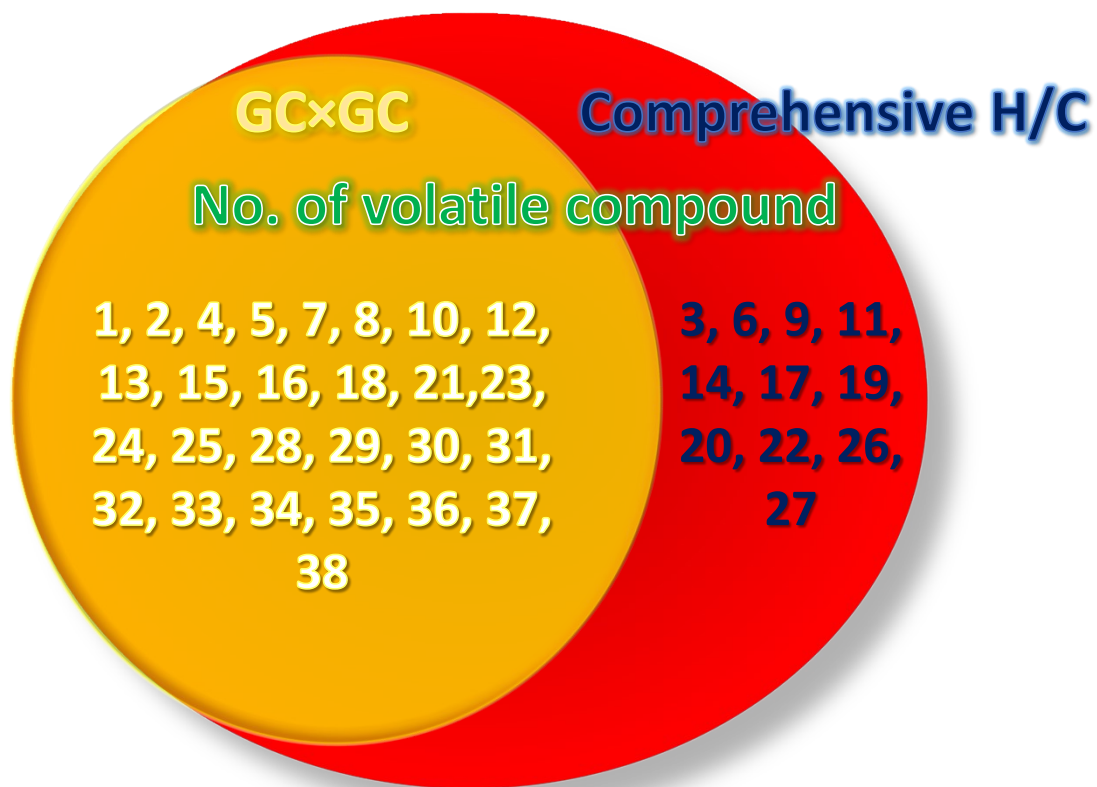

**Fig. S4.** Venn diagram showing the number of identified compounds in **Table 1** using GC×GC and the comprehensive H/C MDGC techniques.
